# Supplementary material for: Rapid Tear Proteomics via In-Capillary Digestion for Biomarker Discovery
Source: Preprints.org preprint supplement (doi:10.20944/preprints202410.0589.v1), 2024-10-08
Supplement: Supplementary file 1 [file supplementary]

## Sheet: 1) Table S1 Description
Table S1. Tear Proteins Identified in Experiments to Optimize Protein Quantities and LC Gradients for LC-MS/MS
A total of 30 tabs are included in this file:
Tab 1. Table S1 description
Tab 2. All proteins identified (922): A comprehensive list of 922 proteins identified during experiments optimizing protein quantities and LC gradients for LC-MS/MS. This is the integrated and summarized data from 27 LC-MS/MS datasets, with redundant proteins removed.
Tab 3. Data summary and bar chart: A summary of proteins identified in each individual LC-MS/MS experiment, along with the data for the bar chart in Figure 2.
Tab 4. 200ng-21min#1 (167): The 167 proteins identified using 200 ng of peptides and a 21-minute LC gradient, repeat 1.
Tab 5. 200ng-21min#2 (166): The 166 proteins identified using 200 ng of peptides and a 21-minute LC gradient, repeat 2.
Tab 6. 200ng-21min#3 (207): The 207 proteins identified using 200 ng of peptides and a 21-minute LC gradient, repeat 3.
Tab 7. 200ng-44min#1 (220): The 220 proteins identified using 200 ng of peptides and a 44-minute LC gradient, repeat 1.
Tab 8. 200ng-44min#2 (201): The 201 proteins identified using 200 ng of peptides and a 44-minute LC gradient, repeat 2.
Tab 9. 200ng-44min#3 (190): The 190 proteins identified using 200 ng of peptides and a 44-minute LC gradient, repeat 3.
Tab 10. 200ng-88min#1 (402): The 402 proteins identified using 200 ng of peptides and a 88-minute LC gradient, repeat 1.
Tab 11. 200ng-88min#2 (411): The 411 proteins identified using 200 ng of peptides and a 88-minute LC gradient, repeat 2.
Tab 12. 200ng-88min#3 (429): The 429 proteins identified using 200 ng of peptides and a 88-minute LC gradient, repeat 3.
Tab 13. 500ng-21min#1 (292): The 292 proteins identified using 500 ng of peptides and a 21-minute LC gradient, repeat 1.
Tab 14. 500ng-21min#2 (304): The 304 proteins identified using 500 ng of peptides and a 21-minute LC gradient, repeat 2.
Tab 15. 500ng-21min#3 (284): The 284 proteins identified using 500 ng of peptides and a 21-minute LC gradient, repeat 3.
Tab 16. 500ng-44min#1 (322): The 322 proteins identified using 500 ng of peptides and a 44-minute LC gradient, repeat 1.
Tab 17. 500ng-44min#2 (316): The 316 proteins identified using 500 ng of peptides and a 44-minute LC gradient, repeat 2.
Tab 18. 500ng-44min#3 (337): The 337 proteins identified using 500 ng of peptides and a 44-minute LC gradient, repeat 3.
Tab 19. 500ng-88min#1 (597): The 597 proteins identified using 500 ng of peptides and a 88-minute LC gradient, repeat 1.
Tab 20. 500ng-88min#2 (568): The 568 proteins identified using 500 ng of peptides and a 88-minute LC gradient, repeat 2.
Tab 21. 500ng-88min#3 (608): The 608 proteins identified using 500 ng of peptides and a 88-minute LC gradient, repeat 3.
Tab 22. 1000ng-21min#1 (241): The 241 proteins identified using 1000 ng of peptides and a 21-minute LC gradient, repeat 1.
Tab 23. 1000ng-21min#2 (238): The 238 proteins identified using 1000 ng of peptides and a 21-minute LC gradient, repeat 2.
Tab 24. 1000ng-21min#3 (245): The 245 proteins identified using 1000 ng of peptides and a 21-minute LC gradient, repeat 3.
Tab 25. 1000ng-44min#1 (277): The 277 proteins identified using 1000 ng of peptides and a 44-minute LC gradient, repeat 1.
Tab 26. 1000ng-44min#2 (268): The 268 proteins identified using 1000 ng of peptides and a 44-minute LC gradient, repeat 2.
Tab 27. 1000ng-44min#3 (276): The 276 proteins identified using 1000 ng of peptides and a 44-minute LC gradient, repeat 3.
Tab 28. 1000ng-88min#1 (541): The 541 proteins identified using 1000 ng of peptides and a 88-minute LC gradient, repeat 1.
Tab 29. 1000ng-88min#2 (528): The 528 proteins identified using 1000 ng of peptides and a 88-minute LC gradient, repeat 2.
Tab 30. 1000ng-88min#3 (504): The 504 proteins identified using 1000 ng of peptides and a 88-minute LC gradient, repeat 3.
Notes:
1. NSAF Score: Normalized Spectral Abundance Factor Score. The NSAF score is used to estimate protein abundance in label-free proteomics. It normalizes the spectral counts (i.e., the number of times peptides from a protein are detected in mass spectrometry) by the length of the protein to account for larger proteins naturally producing more peptides.
2. EmPAI Score: Exponentially Modified Protein Abundance Index Score. The EmPAI score is another label-free quantification method used in proteomics to estimate protein abundance. It calculates the protein's coverage based on the number of observed peptides compared to the number of theoretical peptides that could be detected, providing an estimation of protein concentration in a sample.

## Sheet: 2) All proteins identified(922)
Protein Group Name	Protein Accession	Protein Length	Protein Molecular Weight	Total PSMs from 27 Data Sets	Protein Description	Protein Description	Gene symbol
sp|P02788|TRFL_HUMAN	P02788	710	78182	39643	Lactotransferrin OS=Homo sapiens OX=9606 GN=LTF PE=1 SV=6	Lactotransferrin	LTF
sp|P61626|LYSC_HUMAN	P61626	148	16537	14034	Lysozyme C OS=Homo sapiens OX=9606 GN=LYZ PE=1 SV=1	Lysozyme C	LYZ
sp|P31025|LCN1_HUMAN	P31025	176	19250	10965	Lipocalin-1 OS=Homo sapiens OX=9606 GN=LCN1 PE=1 SV=1	Lipocalin-1	LCN1
sp|P01833|PIGR_HUMAN	P01833	764	83284	9412	Polymeric immunoglobulin receptor OS=Homo sapiens OX=9606 GN=PIGR PE=1 SV=4	Polymeric immunoglobulin receptor	PIGR
sp|P01876|IGHA1_HUMAN	P01876	398	42849	8550	Immunoglobulin heavy constant alpha 1 OS=Homo sapiens OX=9606 GN=IGHA1 PE=1 SV=3	Immunoglobulin heavy constant alpha 1	IGHA1
sp|P02768|ALBU_HUMAN	P02768	609	69367	8347	Albumin OS=Homo sapiens OX=9606 GN=ALB PE=1 SV=2	Albumin	ALB
sp|P12273|PIP_HUMAN	P12273	146	16572	7162	Prolactin-inducible protein OS=Homo sapiens OX=9606 GN=PIP PE=1 SV=1	Prolactin-inducible protein	PIP
sp|P04264|K2C1_HUMAN	P04264	644	66039	6831	Keratin, type II cytoskeletal 1 OS=Homo sapiens OX=9606 GN=KRT1 PE=1 SV=6	Keratin, type II cytoskeletal 1	KRT1
sp|Q9GZZ8|LACRT_HUMAN	Q9GZZ8	138	14246	6066	Extracellular glycoprotein lacritin OS=Homo sapiens OX=9606 GN=LACRT PE=1 SV=1	Extracellular glycoprotein lacritin	LACRT
sp|P25311|ZA2G_HUMAN	P25311	298	34259	5868	Zinc-alpha-2-glycoprotein OS=Homo sapiens OX=9606 GN=AZGP1 PE=1 SV=2	Zinc-alpha-2-glycoprotein	AZGP1
sp|P01024|CO3_HUMAN	P01024	1663	187147	5511	Complement C3 OS=Homo sapiens OX=9606 GN=C3 PE=1 SV=2	Complement C3	C3
sp|P98160|PGBM_HUMAN	P98160	4391	468835	5274	Basement membrane-specific heparan sulfate proteoglycan core protein OS=Homo sapiens OX=9606 GN=HSPG2 PE=1 SV=4	Basement membrane-specific heparan sulfate proteoglycan core protein	HSPG2
sp|O75556|SG2A1_HUMAN	O75556	95	10884	4844	Mammaglobin-B OS=Homo sapiens OX=9606 GN=SCGB2A1 PE=1 SV=1	Mammaglobin-B	SCGB2A1
sp|P0DOX2|IGA2_HUMAN	P0DOX2	455	48934	4704	Immunoglobulin alpha-2 heavy chain OS=Homo sapiens OX=9606 PE=1 SV=2	Immunoglobulin alpha-2 heavy chain
sp|P01834|IGKC_HUMAN	P01834	107	11765	4559	Immunoglobulin kappa constant OS=Homo sapiens OX=9606 GN=IGKC PE=1 SV=2	Immunoglobulin kappa constant	IGKC
sp|P35527|K1C9_HUMAN	P35527	623	62064	4411	Keratin, type I cytoskeletal 9 OS=Homo sapiens OX=9606 GN=KRT9 PE=1 SV=3	Keratin, type I cytoskeletal 9	KRT9
sp|P01036|CYTS_HUMAN	P01036	141	16214	4358	Cystatin-S OS=Homo sapiens OX=9606 GN=CST4 PE=1 SV=3	Cystatin-S	CST4
sp|P01877|IGHA2_HUMAN	P01877	391	42334	4308	Immunoglobulin heavy constant alpha 2 OS=Homo sapiens OX=9606 GN=IGHA2 PE=1 SV=5	Immunoglobulin heavy constant alpha 2	IGHA2
sp|Q9UGM3|DMBT1_HUMAN	Q9UGM3	2413	260734	4272	Deleted in malignant brain tumors 1 protein OS=Homo sapiens OX=9606 GN=DMBT1 PE=1 SV=2	Deleted in malignant brain tumors 1 protein	DMBT1
sp|P13645|K1C10_HUMAN	P13645	584	58827	3757	Keratin, type I cytoskeletal 10 OS=Homo sapiens OX=9606 GN=KRT10 PE=1 SV=6	Keratin, type I cytoskeletal 10	KRT10
sp|P35908|K22E_HUMAN	P35908	639	65433	3626	Keratin, type II cytoskeletal 2 epidermal OS=Homo sapiens OX=9606 GN=KRT2 PE=1 SV=2	Keratin, type II cytoskeletal 2 epidermal	KRT2
sp|P0DOX7|IGK_HUMAN	P0DOX7	214	23379	3559	Immunoglobulin kappa light chain OS=Homo sapiens OX=9606 PE=1 SV=1	Immunoglobulin kappa light chain
sp|Q16378|PROL4_HUMAN	Q16378	134	15097	3501	Proline-rich protein 4 OS=Homo sapiens OX=9606 GN=PRR4 PE=1 SV=3	Proline-rich protein 4	PRR4
sp|P13647|K2C5_HUMAN	P13647	590	62378	3186	Keratin, type II cytoskeletal 5 OS=Homo sapiens OX=9606 GN=KRT5 PE=1 SV=3	Keratin, type II cytoskeletal 5	KRT5
sp|Q99935|PROL1_HUMAN	Q99935	248	27216	3004	Opiorphin prepropeptide OS=Homo sapiens OX=9606 GN=OPRPN PE=1 SV=2	Opiorphin prepropeptide	OPRPN
sp|P02538|K2C6A_HUMAN	P02538	564	60045	2845	Keratin, type II cytoskeletal 6A OS=Homo sapiens OX=9606 GN=KRT6A PE=1 SV=3	Keratin, type II cytoskeletal 6A	KRT6A
sp|P48668|K2C6C_HUMAN	P48668	564	60025	2767	Keratin, type II cytoskeletal 6C OS=Homo sapiens OX=9606 GN=KRT6C PE=1 SV=3	Keratin, type II cytoskeletal 6C	KRT6C
sp|P01037|CYTN_HUMAN	P01037	141	16388	2548	Cystatin-SN OS=Homo sapiens OX=9606 GN=CST1 PE=1 SV=3	Cystatin-SN	CST1
sp|P04259|K2C6B_HUMAN	P04259	564	60067	2504	Keratin, type II cytoskeletal 6B OS=Homo sapiens OX=9606 GN=KRT6B PE=1 SV=5	Keratin, type II cytoskeletal 6B	KRT6B
sp|P0DOY3|IGLC3_HUMAN	P0DOY3	106	11266	2452	Immunoglobulin lambda constant 3 OS=Homo sapiens OX=9606 GN=IGLC3 PE=1 SV=1	Immunoglobulin lambda constant 3	IGLC3
sp|P02533|K1C14_HUMAN	P02533	472	51561	2340	Keratin, type I cytoskeletal 14 OS=Homo sapiens OX=9606 GN=KRT14 PE=1 SV=4	Keratin, type I cytoskeletal 14	KRT14
sp|O95968|SG1D1_HUMAN	O95968	90	9898	2317	Secretoglobin family 1D member 1 OS=Homo sapiens OX=9606 GN=SCGB1D1 PE=1 SV=1	Secretoglobin family 1D member 1	SCGB1D1
sp|P13646|K1C13_HUMAN	P13646	458	49588	2220	Keratin, type I cytoskeletal 13 OS=Homo sapiens OX=9606 GN=KRT13 PE=1 SV=4	Keratin, type I cytoskeletal 13	KRT13
sp|Q13421|MSLN_HUMAN	Q13421	630	68986	2211	Mesothelin OS=Homo sapiens OX=9606 GN=MSLN PE=1 SV=2	Mesothelin	MSLN
sp|P10909|CLUS_HUMAN	P10909	449	52495	2160	Clusterin OS=Homo sapiens OX=9606 GN=CLU PE=1 SV=1	Clusterin	CLU
sp|P01591|IGJ_HUMAN	P01591	159	18099	2101	Immunoglobulin J chain OS=Homo sapiens OX=9606 GN=JCHAIN PE=1 SV=4	Immunoglobulin J chain	JCHAIN
sp|P01871|IGHM_HUMAN	P01871	474	51924	2037	Immunoglobulin heavy constant mu OS=Homo sapiens OX=9606 GN=IGHM PE=1 SV=5	Immunoglobulin heavy constant mu	IGHM
sp|P22079|PERL_HUMAN	P22079	712	80288	1893	Lactoperoxidase OS=Homo sapiens OX=9606 GN=LPO PE=1 SV=2	Lactoperoxidase	LPO
sp|P02787|TRFE_HUMAN	P02787	698	77050	1730	Serotransferrin OS=Homo sapiens OX=9606 GN=TF PE=1 SV=4	Serotransferrin	TF
sp|P08779|K1C16_HUMAN	P08779	473	51268	1684	Keratin, type I cytoskeletal 16 OS=Homo sapiens OX=9606 GN=KRT16 PE=1 SV=4	Keratin, type I cytoskeletal 16	KRT16
sp|P14555|PA2GA_HUMAN	P14555	144	16083	1648	Phospholipase A2, membrane associated OS=Homo sapiens OX=9606 GN=PLA2G2A PE=1 SV=2	Phospholipase A2, membrane associated	PLA2G2A
sp|P0DOX6|IGM_HUMAN	P0DOX6	576	63486	1594	Immunoglobulin mu heavy chain OS=Homo sapiens OX=9606 PE=1 SV=2	Immunoglobulin mu heavy chain
sp|P0DOX8|IGL1_HUMAN	P0DOX8	216	22830	1589	Immunoglobulin lambda-1 light chain OS=Homo sapiens OX=9606 PE=1 SV=1	Immunoglobulin lambda-1 light chain
sp|Q08380|LG3BP_HUMAN	Q08380	585	65331	1540	Galectin-3-binding protein OS=Homo sapiens OX=9606 GN=LGALS3BP PE=1 SV=1	Galectin-3-binding protein	LGALS3BP
sp|P00450|CERU_HUMAN	P00450	1065	122205	1531	Ceruloplasmin OS=Homo sapiens OX=9606 GN=CP PE=1 SV=1	Ceruloplasmin	CP
sp|P19013|K2C4_HUMAN	P19013	520	56144	1482	Keratin, type II cytoskeletal 4 OS=Homo sapiens OX=9606 GN=KRT4 PE=1 SV=5	Keratin, type II cytoskeletal 4	KRT4
sp|P60709|ACTB_HUMAN;sp|P63261|ACTG_HUMAN	P60709;P63261	375	41737	1441	Actin, cytoplasmic 1 OS=Homo sapiens OX=9606 GN=ACTB PE=1 SV=1	Actin, cytoplasmic 1	ACTB
sp|P08727|K1C19_HUMAN	P08727	400	44106	1332	Keratin, type I cytoskeletal 19 OS=Homo sapiens OX=9606 GN=KRT19 PE=1 SV=4	Keratin, type I cytoskeletal 19	KRT19
sp|P00738|HPT_HUMAN	P00738	406	45205	1322	Haptoglobin OS=Homo sapiens OX=9606 GN=HP PE=1 SV=1	Haptoglobin	HP
sp|P03973|SLPI_HUMAN	P03973	132	14326	1220	Antileukoproteinase OS=Homo sapiens OX=9606 GN=SLPI PE=1 SV=2	Antileukoproteinase	SLPI
sp|Q04695|K1C17_HUMAN	Q04695	432	48106	1220	Keratin, type I cytoskeletal 17 OS=Homo sapiens OX=9606 GN=KRT17 PE=1 SV=2	Keratin, type I cytoskeletal 17	KRT17
sp|P61769|B2MG_HUMAN	P61769	119	13715	1209	Beta-2-microglobulin OS=Homo sapiens OX=9606 GN=B2M PE=1 SV=1	Beta-2-microglobulin	B2M
sp|P12035|K2C3_HUMAN	P12035	628	64417	1169	Keratin, type II cytoskeletal 3 OS=Homo sapiens OX=9606 GN=KRT3 PE=1 SV=3	Keratin, type II cytoskeletal 3	KRT3
sp|P80188|NGAL_HUMAN	P80188	198	22588	1105	Neutrophil gelatinase-associated lipocalin OS=Homo sapiens OX=9606 GN=LCN2 PE=1 SV=2	Neutrophil gelatinase-associated lipocalin	LCN2
sp|P06396|GELS_HUMAN	P06396	782	85697	1098	Gelsolin OS=Homo sapiens OX=9606 GN=GSN PE=1 SV=1	Gelsolin	GSN
sp|P19012|K1C15_HUMAN	P19012	456	49212	1074	Keratin, type I cytoskeletal 15 OS=Homo sapiens OX=9606 GN=KRT15 PE=1 SV=3	Keratin, type I cytoskeletal 15	KRT15
sp|Q01546|K22O_HUMAN	Q01546	638	65841	1060	Keratin, type II cytoskeletal 2 oral OS=Homo sapiens OX=9606 GN=KRT76 PE=1 SV=2	Keratin, type II cytoskeletal 2 oral	KRT76
sp|P0DOY2|IGLC2_HUMAN	P0DOY2	106	11294	1028	Immunoglobulin lambda constant 2 OS=Homo sapiens OX=9606 GN=IGLC2 PE=1 SV=1	Immunoglobulin lambda constant 2	IGLC2
sp|Q5XKE5|K2C79_HUMAN	Q5XKE5	535	57836	996	Keratin, type II cytoskeletal 79 OS=Homo sapiens OX=9606 GN=KRT79 PE=1 SV=2	Keratin, type II cytoskeletal 79	KRT79
sp|P80303|NUCB2_HUMAN	P80303	420	50223	963	Nucleobindin-2 OS=Homo sapiens OX=9606 GN=NUCB2 PE=1 SV=3	Nucleobindin-2	NUCB2
sp|P07858|CATB_HUMAN	P07858	339	37822	951	Cathepsin B OS=Homo sapiens OX=9606 GN=CTSB PE=1 SV=3	Cathepsin B	CTSB
sp|B9A064|IGLL5_HUMAN;sp|P0DOX8|IGL1_HUMAN	B9A064;P0DOX8	214	23063	941	Immunoglobulin lambda-like polypeptide 5 OS=Homo sapiens OX=9606 GN=IGLL5 PE=1 SV=2	Immunoglobulin lambda-like polypeptide 5	IGLL5
sp|A0M8Q6|IGLC7_HUMAN	A0M8Q6	106	11254	933	Immunoglobulin lambda constant 7 OS=Homo sapiens OX=9606 GN=IGLC7 PE=1 SV=3	Immunoglobulin lambda constant 7	IGLC7
sp|O95678|K2C75_HUMAN	O95678	551	59560	932	Keratin, type II cytoskeletal 75 OS=Homo sapiens OX=9606 GN=KRT75 PE=1 SV=2	Keratin, type II cytoskeletal 75	KRT75
sp|Q8N474|SFRP1_HUMAN	Q8N474	314	35386	926	Secreted frizzled-related protein 1 OS=Homo sapiens OX=9606 GN=SFRP1 PE=1 SV=1	Secreted frizzled-related protein 1	SFRP1
sp|P98088|MUC5A_HUMAN	P98088	5654	585574	917	Mucin-5AC OS=Homo sapiens OX=9606 GN=MUC5AC PE=1 SV=4	Mucin-5AC	MUC5AC
sp|P20061|TCO1_HUMAN	P20061	433	48207	810	Transcobalamin-1 OS=Homo sapiens OX=9606 GN=TCN1 PE=1 SV=2	Transcobalamin-1	TCN1
sp|P15924|DESP_HUMAN	P15924	2871	331774	796	Desmoplakin OS=Homo sapiens OX=9606 GN=DSP PE=1 SV=3	Desmoplakin	DSP
sp|P04083|ANXA1_HUMAN	P04083	346	38714	767	Annexin A1 OS=Homo sapiens OX=9606 GN=ANXA1 PE=1 SV=2	Annexin A1	ANXA1
sp|P68032|ACTC_HUMAN;sp|P68133|ACTS_HUMAN	P68032;P68133	377	42019	751	Actin, alpha cardiac muscle 1 OS=Homo sapiens OX=9606 GN=ACTC1 PE=1 SV=1	Actin, alpha cardiac muscle 1	ACTC1
sp|P01034|CYTC_HUMAN	P01034	146	15799	750	Cystatin-C OS=Homo sapiens OX=9606 GN=CST3 PE=1 SV=1	Cystatin-C	CST3
sp|P01009|A1AT_HUMAN	P01009	418	46737	728	Alpha-1-antitrypsin OS=Homo sapiens OX=9606 GN=SERPINA1 PE=1 SV=3	Alpha-1-antitrypsin	SERPINA1
sp|Q86Y46|K2C73_HUMAN	Q86Y46	540	58923	688	Keratin, type II cytoskeletal 73 OS=Homo sapiens OX=9606 GN=KRT73 PE=1 SV=1	Keratin, type II cytoskeletal 73	KRT73
sp|P07602|SAP_HUMAN	P07602	524	58113	677	Prosaposin OS=Homo sapiens OX=9606 GN=PSAP PE=1 SV=2	Prosaposin	PSAP
sp|A0A0B4J1X5|HV374_HUMAN	A0A0B4J1X5	117	12840	666	Immunoglobulin heavy variable 3-74 OS=Homo sapiens OX=9606 GN=IGHV3-74 PE=3 SV=1	Immunoglobulin heavy variable 3-74	IGHV3-74
sp|P02647|APOA1_HUMAN	P02647	267	30778	658	Apolipoprotein A-I OS=Homo sapiens OX=9606 GN=APOA1 PE=1 SV=1	Apolipoprotein A-I	APOA1
sp|P07355|ANXA2_HUMAN	P07355	339	38604	649	Annexin A2 OS=Homo sapiens OX=9606 GN=ANXA2 PE=1 SV=2	Annexin A2	ANXA2
sp|P0DOX5|IGG1_HUMAN	P0DOX5	449	49329	644	Immunoglobulin gamma-1 heavy chain OS=Homo sapiens OX=9606 PE=1 SV=2	Immunoglobulin gamma-1 heavy chain
sp|P07339|CATD_HUMAN	P07339	412	44552	623	Cathepsin D OS=Homo sapiens OX=9606 GN=CTSD PE=1 SV=1	Cathepsin D	CTSD
sp|Q14515|SPRL1_HUMAN	Q14515	664	75208	597	SPARC-like protein 1 OS=Homo sapiens OX=9606 GN=SPARCL1 PE=1 SV=2	SPARC-like protein 1	SPARCL1
sp|Q14697|GANAB_HUMAN	Q14697	944	106874	580	Neutral alpha-glucosidase AB OS=Homo sapiens OX=9606 GN=GANAB PE=1 SV=3	Neutral alpha-glucosidase AB	GANAB
sp|P05787|K2C8_HUMAN	P05787	483	53704	577	Keratin, type II cytoskeletal 8 OS=Homo sapiens OX=9606 GN=KRT8 PE=1 SV=7	Keratin, type II cytoskeletal 8	KRT8
sp|P02814|SMR3B_HUMAN	P02814	79	8188	563	Submaxillary gland androgen-regulated protein 3B OS=Homo sapiens OX=9606 GN=SMR3B PE=1 SV=2	Submaxillary gland androgen-regulated protein 3B	SMR3B
sp|P00751|CFAB_HUMAN	P00751	764	85533	557	Complement factor B OS=Homo sapiens OX=9606 GN=CFB PE=1 SV=2	Complement factor B	CFB
sp|Q3SY84|K2C71_HUMAN	Q3SY84	523	57292	552	Keratin, type II cytoskeletal 71 OS=Homo sapiens OX=9606 GN=KRT71 PE=1 SV=3	Keratin, type II cytoskeletal 71	KRT71
sp|Q96DA0|ZG16B_HUMAN	Q96DA0	208	22739	549	Zymogen granule protein 16 homolog B OS=Homo sapiens OX=9606 GN=ZG16B PE=1 SV=3	Zymogen granule protein 16 homolog B	ZG16B
sp|P01780|HV307_HUMAN	P01780	117	12943	534	Immunoglobulin heavy variable 3-7 OS=Homo sapiens OX=9606 GN=IGHV3-7 PE=1 SV=2	Immunoglobulin heavy variable 3-7	IGHV3-7
sp|P06702|S10A9_HUMAN	P06702	114	13242	533	Protein S100-A9 OS=Homo sapiens OX=9606 GN=S100A9 PE=1 SV=1	Protein S100-A9	S100A9
sp|P01011|AACT_HUMAN	P01011	423	47651	515	Alpha-1-antichymotrypsin OS=Homo sapiens OX=9606 GN=SERPINA3 PE=1 SV=2	Alpha-1-antichymotrypsin	SERPINA3
sp|Q7Z794|K2C1B_HUMAN	Q7Z794	578	61901	514	Keratin, type II cytoskeletal 1b OS=Homo sapiens OX=9606 GN=KRT77 PE=1 SV=3	Keratin, type II cytoskeletal 1b	KRT77
sp|P09228|CYTT_HUMAN	P09228	141	16445	510	Cystatin-SA OS=Homo sapiens OX=9606 GN=CST2 PE=1 SV=1	Cystatin-SA	CST2
sp|Q14CN4|K2C72_HUMAN	Q14CN4	511	55877	499	Keratin, type II cytoskeletal 72 OS=Homo sapiens OX=9606 GN=KRT72 PE=1 SV=2	Keratin, type II cytoskeletal 72	KRT72
sp|A0A0B4J1V0|HV315_HUMAN	A0A0B4J1V0	119	12926	491	Immunoglobulin heavy variable 3-15 OS=Homo sapiens OX=9606 GN=IGHV3-15 PE=3 SV=1	Immunoglobulin heavy variable 3-15	IGHV3-15
sp|Q6MZM9|PRR27_HUMAN	Q6MZM9	219	22720	484	Proline-rich protein 27 OS=Homo sapiens OX=9606 GN=PRR27 PE=2 SV=1	Proline-rich protein 27	PRR27
sp|A0A0B4J1Y9|HV372_HUMAN	A0A0B4J1Y9	119	13203	483	Immunoglobulin heavy variable 3-72 OS=Homo sapiens OX=9606 GN=IGHV3-72 PE=3 SV=1	Immunoglobulin heavy variable 3-72	IGHV3-72
sp|Q5VSP4|LC1L1_HUMAN	Q5VSP4	162	17918	474	Putative lipocalin 1-like protein 1 OS=Homo sapiens OX=9606 GN=LCN1P1 PE=5 SV=1	Putative lipocalin 1-like protein 1	LCN1P1
sp|P04406|G3P_HUMAN	P04406	335	36053	473	Glyceraldehyde-3-phosphate dehydrogenase OS=Homo sapiens OX=9606 GN=GAPDH PE=1 SV=3	Glyceraldehyde-3-phosphate dehydrogenase	GAPDH
sp|P04792|HSPB1_HUMAN	P04792	205	22783	471	Heat shock protein beta-1 OS=Homo sapiens OX=9606 GN=HSPB1 PE=1 SV=2	Heat shock protein beta-1	HSPB1
sp|Q02818|NUCB1_HUMAN	Q02818	461	53879	467	Nucleobindin-1 OS=Homo sapiens OX=9606 GN=NUCB1 PE=1 SV=4	Nucleobindin-1	NUCB1
sp|P49788|TIG1_HUMAN	P49788	294	33285	459	Retinoic acid receptor responder protein 1 OS=Homo sapiens OX=9606 GN=RARRES1 PE=1 SV=2	Retinoic acid receptor responder protein 1	RARRES1
sp|P08603|CFAH_HUMAN	P08603	1231	139096	450	Complement factor H OS=Homo sapiens OX=9606 GN=CFH PE=1 SV=4	Complement factor H	CFH
sp|Q5T749|KPRP_HUMAN	Q5T749	579	64136	448	Keratinocyte proline-rich protein OS=Homo sapiens OX=9606 GN=KPRP PE=1 SV=1	Keratinocyte proline-rich protein	KPRP
sp|P06733|ENOA_HUMAN	P06733	434	47169	437	Alpha-enolase OS=Homo sapiens OX=9606 GN=ENO1 PE=1 SV=2	Alpha-enolase	ENO1
sp|Q8N1N4|K2C78_HUMAN	Q8N1N4	520	56866	436	Keratin, type II cytoskeletal 78 OS=Homo sapiens OX=9606 GN=KRT78 PE=1 SV=2	Keratin, type II cytoskeletal 78	KRT78
sp|P05109|S10A8_HUMAN	P05109	93	10834	431	Protein S100-A8 OS=Homo sapiens OX=9606 GN=S100A8 PE=1 SV=1	Protein S100-A8	S100A8
sp|P14923|PLAK_HUMAN	P14923	745	81745	423	Junction plakoglobin OS=Homo sapiens OX=9606 GN=JUP PE=1 SV=3	Junction plakoglobin	JUP
sp|P55058|PLTP_HUMAN	P55058	493	54739	410	Phospholipid transfer protein OS=Homo sapiens OX=9606 GN=PLTP PE=1 SV=1	Phospholipid transfer protein	PLTP
sp|Q6UXB2|CXL17_HUMAN	Q6UXB2	119	13819	402	C-X-C motif chemokine 17 OS=Homo sapiens OX=9606 GN=CXCL17 PE=1 SV=1	C-X-C motif chemokine 17	CXCL17
sp|P30740|ILEU_HUMAN	P30740	379	42742	397	Leukocyte elastase inhibitor OS=Homo sapiens OX=9606 GN=SERPINB1 PE=1 SV=1	Leukocyte elastase inhibitor	SERPINB1
sp|Q13217|DNJC3_HUMAN	Q13217	504	57580	391	DnaJ homolog subfamily C member 3 OS=Homo sapiens OX=9606 GN=DNAJC3 PE=1 SV=1	DnaJ homolog subfamily C member 3	DNAJC3
sp|P01772|HV333_HUMAN	P01772	117	13074	388	Immunoglobulin heavy variable 3-33 OS=Homo sapiens OX=9606 GN=IGHV3-33 PE=1 SV=2	Immunoglobulin heavy variable 3-33	IGHV3-33
sp|P01768|HV330_HUMAN;sp|P0DP03|HVC05_HUMAN	P01768;P0DP03	117	12947	386	Immunoglobulin heavy variable 3-30 OS=Homo sapiens OX=9606 GN=IGHV3-30 PE=1 SV=2	Immunoglobulin heavy variable 3-30	IGHV3-30
sp|P01033|TIMP1_HUMAN	P01033	207	23171	385	Metalloproteinase inhibitor 1 OS=Homo sapiens OX=9606 GN=TIMP1 PE=1 SV=1	Metalloproteinase inhibitor 1	TIMP1
sp|Q7Z3Y8|K1C27_HUMAN	Q7Z3Y8	459	49822	378	Keratin, type I cytoskeletal 27 OS=Homo sapiens OX=9606 GN=KRT27 PE=1 SV=2	Keratin, type I cytoskeletal 27	KRT27
sp|P01782|HV309_HUMAN	P01782	118	12945	372	Immunoglobulin heavy variable 3-9 OS=Homo sapiens OX=9606 GN=IGHV3-9 PE=1 SV=2	Immunoglobulin heavy variable 3-9	IGHV3-9
sp|P01764|HV323_HUMAN	P01764	117	12582	366	Immunoglobulin heavy variable 3-23 OS=Homo sapiens OX=9606 GN=IGHV3-23 PE=1 SV=2	Immunoglobulin heavy variable 3-23	IGHV3-23
sp|Q15782|CH3L2_HUMAN	Q15782	390	43501	365	Chitinase-3-like protein 2 OS=Homo sapiens OX=9606 GN=CHI3L2 PE=1 SV=1	Chitinase-3-like protein 2	CHI3L2
sp|P01860|IGHG3_HUMAN	P01860	446	49093	344	Immunoglobulin heavy constant gamma 3 OS=Homo sapiens OX=9606 GN=IGHG3 PE=1 SV=3	Immunoglobulin heavy constant gamma 3	IGHG3
sp|P0DTE7|AMY1B_HUMAN;sp|P0DUB6|AMY1A_HUMAN;sp|P0DTE8|AMY1C_HUMAN	P0DTE7;P0DUB6;P0DTE8	511	57768	339	Alpha-amylase 1B OS=Homo sapiens OX=9606 GN=AMY1B PE=1 SV=1	Alpha-amylase 1B	AMY1B
sp|P0DP04|HV43D_HUMAN	P0DP04	118	13017	338	Immunoglobulin heavy variable 3-43D OS=Homo sapiens OX=9606 GN=IGHV3-43D PE=3 SV=1	Immunoglobulin heavy variable 3-43D	IGHV3-43D
sp|Q96S96|PEBP4_HUMAN	Q96S96	227	25733	338	Phosphatidylethanolamine-binding protein 4 OS=Homo sapiens OX=9606 GN=PEBP4 PE=1 SV=3	Phosphatidylethanolamine-binding protein 4	PEBP4
sp|A0A0A0MS15|HV349_HUMAN	A0A0A0MS15	119	13056	335	Immunoglobulin heavy variable 3-49 OS=Homo sapiens OX=9606 GN=IGHV3-49 PE=3 SV=1	Immunoglobulin heavy variable 3-49	IGHV3-49
sp|P81605|DCD_HUMAN	P81605	110	11284	330	Dermcidin OS=Homo sapiens OX=9606 GN=DCD PE=1 SV=2	Dermcidin	DCD
sp|Q02809|PLOD1_HUMAN	Q02809	727	83550	329	Procollagen-lysine,2-oxoglutarate 5-dioxygenase 1 OS=Homo sapiens OX=9606 GN=PLOD1 PE=1 SV=2	Procollagen-lysine,2-oxoglutarate 5-dioxygenase 1	PLOD1
sp|P26447|S10A4_HUMAN	P26447	101	11728	325	Protein S100-A4 OS=Homo sapiens OX=9606 GN=S100A4 PE=1 SV=1	Protein S100-A4	S100A4
sp|P01763|HV348_HUMAN	P01763	117	12813	323	Immunoglobulin heavy variable 3-48 OS=Homo sapiens OX=9606 GN=IGHV3-48 PE=1 SV=2	Immunoglobulin heavy variable 3-48	IGHV3-48
sp|P06312|KV401_HUMAN	P06312	121	13380	322	Immunoglobulin kappa variable 4-1 OS=Homo sapiens OX=9606 GN=IGKV4-1 PE=1 SV=1	Immunoglobulin kappa variable 4-1	IGKV4-1
sp|P34096|RNAS4_HUMAN	P34096	147	16840	316	Ribonuclease 4 OS=Homo sapiens OX=9606 GN=RNASE4 PE=1 SV=3	Ribonuclease 4	RNASE4
sp|Q99456|K1C12_HUMAN	Q99456	494	53511	310	Keratin, type I cytoskeletal 12 OS=Homo sapiens OX=9606 GN=KRT12 PE=1 SV=1	Keratin, type I cytoskeletal 12	KRT12
sp|A0A0C4DH72|KV106_HUMAN	A0A0C4DH72	117	12697	299	Immunoglobulin kappa variable 1-6 OS=Homo sapiens OX=9606 GN=IGKV1-6 PE=3 SV=1	Immunoglobulin kappa variable 1-6	IGKV1-6
sp|P02774|VTDB_HUMAN	P02774	474	52918	299	Vitamin D-binding protein OS=Homo sapiens OX=9606 GN=GC PE=1 SV=2	Vitamin D-binding protein	GC
sp|P02763|A1AG1_HUMAN	P02763	201	23540	293	Alpha-1-acid glycoprotein 1 OS=Homo sapiens OX=9606 GN=ORM1 PE=1 SV=2	Alpha-1-acid glycoprotein 1	ORM1
sp|A0A0B4J1V1|HV321_HUMAN	A0A0B4J1V1	117	12840	291	Immunoglobulin heavy variable 3-21 OS=Homo sapiens OX=9606 GN=IGHV3-21 PE=1 SV=1	Immunoglobulin heavy variable 3-21	IGHV3-21
sp|P01619|KV320_HUMAN	P01619	116	12557	289	Immunoglobulin kappa variable 3-20 OS=Homo sapiens OX=9606 GN=IGKV3-20 PE=1 SV=2	Immunoglobulin kappa variable 3-20	IGKV3-20
sp|Q02413|DSG1_HUMAN	Q02413	1049	113748	288	Desmoglein-1 OS=Homo sapiens OX=9606 GN=DSG1 PE=1 SV=2	Desmoglein-1	DSG1
sp|P05089|ARGI1_HUMAN	P05089	322	34735	285	Arginase-1 OS=Homo sapiens OX=9606 GN=ARG1 PE=1 SV=2	Arginase-1	ARG1
sp|P28799|GRN_HUMAN	P28799	593	63545	284	Progranulin OS=Homo sapiens OX=9606 GN=GRN PE=1 SV=2	Progranulin	GRN
sp|P62937|PPIA_HUMAN	P62937	165	18012	283	Peptidyl-prolyl cis-trans isomerase A OS=Homo sapiens OX=9606 GN=PPIA PE=1 SV=2	Peptidyl-prolyl cis-trans isomerase A	PPIA
sp|O00391|QSOX1_HUMAN	O00391	747	82578	282	Sulfhydryl oxidase 1 OS=Homo sapiens OX=9606 GN=QSOX1 PE=1 SV=3	Sulfhydryl oxidase 1	QSOX1
sp|P01859|IGHG2_HUMAN	P01859	395	43806	280	Immunoglobulin heavy constant gamma 2 OS=Homo sapiens OX=9606 GN=IGHG2 PE=1 SV=3	Immunoglobulin heavy constant gamma 2	IGHG2
sp|P59665|DEF1_HUMAN;sp|P59666|DEF3_HUMAN	P59665;P59666	94	10201	277	Neutrophil defensin 1 OS=Homo sapiens OX=9606 GN=DEFA1 PE=1 SV=1	Neutrophil defensin 1	DEFA1
sp|P08571|CD14_HUMAN	P08571	375	40076	274	Monocyte differentiation antigen CD14 OS=Homo sapiens OX=9606 GN=CD14 PE=1 SV=2	Monocyte differentiation antigen CD14	CD14
sp|P0DP02|HVC33_HUMAN	P0DP02	117	12989	271	Immunoglobulin heavy variable 3-30-3 OS=Homo sapiens OX=9606 GN=IGHV3-30-3 PE=1 SV=1	Immunoglobulin heavy variable 3-30-3	IGHV3-30-3
sp|P60174|TPIS_HUMAN	P60174	249	26669	270	Triosephosphate isomerase OS=Homo sapiens OX=9606 GN=TPI1 PE=1 SV=4	Triosephosphate isomerase	TPI1
sp|P35900|K1C20_HUMAN	P35900	424	48487	269	Keratin, type I cytoskeletal 20 OS=Homo sapiens OX=9606 GN=KRT20 PE=1 SV=1	Keratin, type I cytoskeletal 20	KRT20
sp|O00584|RNT2_HUMAN	O00584	256	29481	264	Ribonuclease T2 OS=Homo sapiens OX=9606 GN=RNASET2 PE=1 SV=2	Ribonuclease T2	RNASET2
sp|P0DMV8|HS71A_HUMAN;sp|P0DMV9|HS71B_HUMAN	P0DMV8;P0DMV9	641	70052	262	Heat shock 70 kDa protein 1A OS=Homo sapiens OX=9606 GN=HSPA1A PE=1 SV=1	Heat shock 70 kDa protein 1A	HSPA1A
sp|Q92743|HTRA1_HUMAN	Q92743	480	51287	260	Serine protease HTRA1 OS=Homo sapiens OX=9606 GN=HTRA1 PE=1 SV=1	Serine protease HTRA1	HTRA1
sp|P03950|ANGI_HUMAN	P03950	147	16550	256	Angiogenin OS=Homo sapiens OX=9606 GN=ANG PE=1 SV=1	Angiogenin	ANG
sp|Q7Z3Y7|K1C28_HUMAN	Q7Z3Y7	464	50567	256	Keratin, type I cytoskeletal 28 OS=Homo sapiens OX=9606 GN=KRT28 PE=1 SV=2	Keratin, type I cytoskeletal 28	KRT28
sp|Q6S8J3|POTEE_HUMAN	Q6S8J3	1075	121363	248	POTE ankyrin domain family member E OS=Homo sapiens OX=9606 GN=POTEE PE=2 SV=3	POTE ankyrin domain family member E	POTEE
sp|Q9BRK5|CAB45_HUMAN	Q9BRK5	362	41807	246	45 kDa calcium-binding protein OS=Homo sapiens OX=9606 GN=SDF4 PE=1 SV=1	45 kDa calcium-binding protein	SDF4
sp|P01861|IGHG4_HUMAN	P01861	396	43832	244	Immunoglobulin heavy constant gamma 4 OS=Homo sapiens OX=9606 GN=IGHG4 PE=1 SV=2	Immunoglobulin heavy constant gamma 4	IGHG4
sp|Q06830|PRDX1_HUMAN	Q06830	199	22110	244	Peroxiredoxin-1 OS=Homo sapiens OX=9606 GN=PRDX1 PE=1 SV=1	Peroxiredoxin-1	PRDX1
sp|P01624|KV315_HUMAN	P01624	115	12496	241	Immunoglobulin kappa variable 3-15 OS=Homo sapiens OX=9606 GN=IGKV3-15 PE=1 SV=2	Immunoglobulin kappa variable 3-15	IGKV3-15
sp|P14314|GLU2B_HUMAN	P14314	528	59425	238	Glucosidase 2 subunit beta OS=Homo sapiens OX=9606 GN=PRKCSH PE=1 SV=2	Glucosidase 2 subunit beta	PRKCSH
sp|P09211|GSTP1_HUMAN	P09211	210	23356	236	Glutathione S-transferase P OS=Homo sapiens OX=9606 GN=GSTP1 PE=1 SV=2	Glutathione S-transferase P	GSTP1
sp|P02790|HEMO_HUMAN	P02790	462	51676	235	Hemopexin OS=Homo sapiens OX=9606 GN=HPX PE=1 SV=2	Hemopexin	HPX
sp|A0A0C4DH31|HV118_HUMAN	A0A0C4DH31	117	12820	232	Immunoglobulin heavy variable 1-18 OS=Homo sapiens OX=9606 GN=IGHV1-18 PE=3 SV=1	Immunoglobulin heavy variable 1-18	IGHV1-18
sp|A0A075B6P5|KV228_HUMAN;sp|P01615|KVD28_HUMAN;sp|P01614|KVD40_HUMAN;sp|A0A087WW87|KV240_HUMAN	A0A075B6P5;P01615;P01614;A0A087WW87	120	12957	227	Immunoglobulin kappa variable 2-28 OS=Homo sapiens OX=9606 GN=IGKV2-28 PE=3 SV=1	Immunoglobulin kappa variable 2-28	IGKV2-28
sp|P15311|EZRI_HUMAN	P15311	586	69413	227	Ezrin OS=Homo sapiens OX=9606 GN=EZR PE=1 SV=4	Ezrin	EZR
sp|P13987|CD59_HUMAN	P13987	128	14177	226	CD59 glycoprotein OS=Homo sapiens OX=9606 GN=CD59 PE=1 SV=1	CD59 glycoprotein	CD59
sp|A0A0A0MRZ8|KVD11_HUMAN;sp|P04433|KV311_HUMAN	A0A0A0MRZ8;P04433	115	12625	224	Immunoglobulin kappa variable 3D-11 OS=Homo sapiens OX=9606 GN=IGKV3D-11 PE=3 SV=6	Immunoglobulin kappa variable 3D-11	IGKV3D-11
sp|P08729|K2C7_HUMAN	P08729	469	51386	224	Keratin, type II cytoskeletal 7 OS=Homo sapiens OX=9606 GN=KRT7 PE=1 SV=5	Keratin, type II cytoskeletal 7	KRT7
sp|P62805|H4_HUMAN	P62805	103	11367	224	Histone H4 OS=Homo sapiens OX=9606 GN=H4C1 PE=1 SV=2	Histone H4	H4C1
sp|P01602|KV105_HUMAN	P01602	117	12782	220	Immunoglobulin kappa variable 1-5 OS=Homo sapiens OX=9606 GN=IGKV1-5 PE=1 SV=2	Immunoglobulin kappa variable 1-5	IGKV1-5
sp|A0A087WSY6|KVD15_HUMAN	A0A087WSY6	115	12534	217	Immunoglobulin kappa variable 3D-15 OS=Homo sapiens OX=9606 GN=IGKV3D-15 PE=3 SV=6	Immunoglobulin kappa variable 3D-15	IGKV3D-15
sp|P01597|KV139_HUMAN;sp|P04432|KVD39_HUMAN	P01597;P04432	117	12737	216	Immunoglobulin kappa variable 1-39 OS=Homo sapiens OX=9606 GN=IGKV1-39 PE=1 SV=2	Immunoglobulin kappa variable 1-39	IGKV1-39
sp|A0A0J9YX35|HV64D_HUMAN	A0A0J9YX35	117	12823	215	Immunoglobulin heavy variable 3-64D OS=Homo sapiens OX=9606 GN=IGHV3-64D PE=3 SV=1	Immunoglobulin heavy variable 3-64D	IGHV3-64D
sp|P05090|APOD_HUMAN	P05090	189	21276	214	Apolipoprotein D OS=Homo sapiens OX=9606 GN=APOD PE=1 SV=1	Apolipoprotein D	APOD
sp|P20930|FILA_HUMAN	P20930	4061	435180	214	Filaggrin OS=Homo sapiens OX=9606 GN=FLG PE=1 SV=3	Filaggrin	FLG
sp|P14618|KPYM_HUMAN	P14618	531	57937	211	Pyruvate kinase PKM OS=Homo sapiens OX=9606 GN=PKM PE=1 SV=4	Pyruvate kinase PKM	PKM
sp|Q5D862|FILA2_HUMAN	Q5D862	2391	248072	211	Filaggrin-2 OS=Homo sapiens OX=9606 GN=FLG2 PE=1 SV=1	Filaggrin-2	FLG2
sp|P01023|A2MG_HUMAN	P01023	1474	163290	207	Alpha-2-macroglobulin OS=Homo sapiens OX=9606 GN=A2M PE=1 SV=3	Alpha-2-macroglobulin	A2M
sp|P07237|PDIA1_HUMAN	P07237	508	57116	206	Protein disulfide-isomerase OS=Homo sapiens OX=9606 GN=P4HB PE=1 SV=3	Protein disulfide-isomerase	P4HB
sp|P06310|KV230_HUMAN	P06310	120	13185	202	Immunoglobulin kappa variable 2-30 OS=Homo sapiens OX=9606 GN=IGKV2-30 PE=3 SV=2	Immunoglobulin kappa variable 2-30	IGKV2-30
sp|P22352|GPX3_HUMAN	P22352	226	25402	201	Glutathione peroxidase 3 OS=Homo sapiens OX=9606 GN=GPX3 PE=1 SV=2	Glutathione peroxidase 3	GPX3
sp|P68371|TBB4B_HUMAN	P68371	445	49831	198	Tubulin beta-4B chain OS=Homo sapiens OX=9606 GN=TUBB4B PE=1 SV=1	Tubulin beta-4B chain	TUBB4B
sp|P29508|SPB3_HUMAN	P29508	390	44565	197	Serpin B3 OS=Homo sapiens OX=9606 GN=SERPINB3 PE=1 SV=2	Serpin B3	SERPINB3
sp|P31949|S10AB_HUMAN	P31949	105	11740	196	Protein S100-A11 OS=Homo sapiens OX=9606 GN=S100A11 PE=1 SV=2	Protein S100-A11	S100A11
sp|P63104|1433Z_HUMAN	P63104	245	27745	196	14-3-3 protein zeta/delta OS=Homo sapiens OX=9606 GN=YWHAZ PE=1 SV=1	14-3-3 protein zeta/delta	YWHAZ
sp|P11021|BIP_HUMAN	P11021	654	72333	192	Endoplasmic reticulum chaperone BiP OS=Homo sapiens OX=9606 GN=HSPA5 PE=1 SV=2	Endoplasmic reticulum chaperone BiP	HSPA5
sp|P10599|THIO_HUMAN	P10599	105	11737	190	Thioredoxin OS=Homo sapiens OX=9606 GN=TXN PE=1 SV=3	Thioredoxin	TXN
sp|A0A0C4DH32|HV320_HUMAN	A0A0C4DH32	117	12673	189	Immunoglobulin heavy variable 3-20 OS=Homo sapiens OX=9606 GN=IGHV3-20 PE=3 SV=2	Immunoglobulin heavy variable 3-20	IGHV3-20
sp|A0A0C4DH41|HV461_HUMAN;sp|P0DP08|HVD82_HUMAN;sp|P0DP06|HVD34_HUMAN;sp|P06331|HV434_HUMAN;sp|P01825|HV459_HUMAN;sp|P01824|HV439_HUMAN	A0A0C4DH41;P0DP08;P0DP06;P06331;P01825;P01824	118	13066	188	Immunoglobulin heavy variable 4-61 OS=Homo sapiens OX=9606 GN=IGHV4-61 PE=1 SV=1	Immunoglobulin heavy variable 4-61	IGHV4-61
sp|P31947|1433S_HUMAN	P31947	248	27774	181	14-3-3 protein sigma OS=Homo sapiens OX=9606 GN=SFN PE=1 SV=1	14-3-3 protein sigma	SFN
sp|Q96BQ1|FAM3D_HUMAN	Q96BQ1	224	24963	181	Protein FAM3D OS=Homo sapiens OX=9606 GN=FAM3D PE=1 SV=1	Protein FAM3D	FAM3D
sp|Q08554|DSC1_HUMAN	Q08554	894	99987	180	Desmocollin-1 OS=Homo sapiens OX=9606 GN=DSC1 PE=1 SV=2	Desmocollin-1	DSC1
sp|P31944|CASPE_HUMAN	P31944	242	27680	178	Caspase-14 OS=Homo sapiens OX=9606 GN=CASP14 PE=1 SV=2	Caspase-14	CASP14
sp|A0A0C4DH36|HV338_HUMAN	A0A0C4DH36	116	12759	176	Probable non-functional immunoglobulin heavy variable 3-38 OS=Homo sapiens OX=9606 GN=IGHV3-38 PE=1 SV=1	Probable non-functional immunoglobulin heavy variable 3-38	IGHV3-38
sp|O43707|ACTN4_HUMAN	O43707	911	104854	172	Alpha-actinin-4 OS=Homo sapiens OX=9606 GN=ACTN4 PE=1 SV=2	Alpha-actinin-4	ACTN4
sp|Q86X29|LSR_HUMAN	Q86X29	649	71439	172	Lipolysis-stimulated lipoprotein receptor OS=Homo sapiens OX=9606 GN=LSR PE=1 SV=4	Lipolysis-stimulated lipoprotein receptor	LSR
sp|P02675|FIBB_HUMAN	P02675	491	55928	169	Fibrinogen beta chain OS=Homo sapiens OX=9606 GN=FGB PE=1 SV=2	Fibrinogen beta chain	FGB
sp|P04075|ALDOA_HUMAN	P04075	364	39420	165	Fructose-bisphosphate aldolase A OS=Homo sapiens OX=9606 GN=ALDOA PE=1 SV=2	Fructose-bisphosphate aldolase A	ALDOA
sp|Q01469|FABP5_HUMAN	Q01469	135	15164	165	Fatty acid-binding protein 5 OS=Homo sapiens OX=9606 GN=FABP5 PE=1 SV=3	Fatty acid-binding protein 5	FABP5
sp|P17931|LEG3_HUMAN	P17931	250	26152	161	Galectin-3 OS=Homo sapiens OX=9606 GN=LGALS3 PE=1 SV=5	Galectin-3	LGALS3
sp|P05164|PERM_HUMAN	P05164	745	83869	156	Myeloperoxidase OS=Homo sapiens OX=9606 GN=MPO PE=1 SV=1	Myeloperoxidase	MPO
sp|P68104|EF1A1_HUMAN;sp|Q5VTE0|EF1A3_HUMAN	P68104;Q5VTE0	462	50141	155	Elongation factor 1-alpha 1 OS=Homo sapiens OX=9606 GN=EEF1A1 PE=1 SV=1	Elongation factor 1-alpha 1	EEF1A1
sp|A0A0C4DH25|KVD20_HUMAN	A0A0C4DH25	116	12515	154	Immunoglobulin kappa variable 3D-20 OS=Homo sapiens OX=9606 GN=IGKV3D-20 PE=3 SV=1	Immunoglobulin kappa variable 3D-20	IGKV3D-20
sp|P01766|HV313_HUMAN	P01766	116	12506	154	Immunoglobulin heavy variable 3-13 OS=Homo sapiens OX=9606 GN=IGHV3-13 PE=1 SV=2	Immunoglobulin heavy variable 3-13	IGHV3-13
sp|P0C0S8|H2A1_HUMAN;sp|Q9BTM1|H2AJ_HUMAN;sp|Q99878|H2A1J_HUMAN;sp|Q96KK5|H2A1H_HUMAN;sp|Q6FI13|H2A2A_HUMAN;sp|Q16777|H2A2C_HUMAN;sp|P20671|H2A1D_HUMAN	P0C0S8;Q9BTM1;Q99878;Q96KK5;Q6FI13;Q16777;P20671	130	14091	154	Histone H2A type 1 OS=Homo sapiens OX=9606 GN=H2AC11 PE=1 SV=2	Histone H2A type 1	H2AC11
sp|A0A0B4J1X8|HV343_HUMAN	A0A0B4J1X8	118	13077	153	Immunoglobulin heavy variable 3-43 OS=Homo sapiens OX=9606 GN=IGHV3-43 PE=3 SV=1	Immunoglobulin heavy variable 3-43	IGHV3-43
sp|P02749|APOH_HUMAN	P02749	345	38298	152	Beta-2-glycoprotein 1 OS=Homo sapiens OX=9606 GN=APOH PE=1 SV=3	Beta-2-glycoprotein 1	APOH
sp|Q86YZ3|HORN_HUMAN	Q86YZ3	2850	282389	152	Hornerin OS=Homo sapiens OX=9606 GN=HRNR PE=1 SV=2	Hornerin	HRNR
sp|A0A075B6R2|HV404_HUMAN	A0A075B6R2	117	12848	151	Immunoglobulin heavy variable 4-4 OS=Homo sapiens OX=9606 GN=IGHV4-4 PE=3 SV=2	Immunoglobulin heavy variable 4-4	IGHV4-4
sp|A0A0C4DH73|KV112_HUMAN;sp|P01611|KVD12_HUMAN	A0A0C4DH73;P01611	117	12645	151	Immunoglobulin kappa variable 1-12 OS=Homo sapiens OX=9606 GN=IGKV1-12 PE=3 SV=1	Immunoglobulin kappa variable 1-12	IGKV1-12
sp|P11142|HSP7C_HUMAN	P11142	646	70898	151	Heat shock cognate 71 kDa protein OS=Homo sapiens OX=9606 GN=HSPA8 PE=1 SV=1	Heat shock cognate 71 kDa protein	HSPA8
sp|O60814|H2B1K_HUMAN;sp|Q99880|H2B1L_HUMAN;sp|Q99879|H2B1M_HUMAN;sp|Q99877|H2B1N_HUMAN;sp|Q93079|H2B1H_HUMAN;sp|Q5QNW6|H2B2F_HUMAN;sp|P62807|H2B1C_HUMAN;sp|P58876|H2B1D_HUMAN;sp|P57053|H2BFS_HUMAN	O60814;Q99880;Q99879;Q99877;Q93079;Q5QNW6;P62807;P58876;P57053	126	13890	149	Histone H2B type 1-K OS=Homo sapiens OX=9606 GN=H2BC12 PE=1 SV=3	Histone H2B type 1-K	H2BC12
sp|P00558|PGK1_HUMAN	P00558	417	44615	147	Phosphoglycerate kinase 1 OS=Homo sapiens OX=9606 GN=PGK1 PE=1 SV=3	Phosphoglycerate kinase 1	PGK1
sp|P02750|A2GL_HUMAN	P02750	347	38178	147	Leucine-rich alpha-2-glycoprotein OS=Homo sapiens OX=9606 GN=LRG1 PE=1 SV=2	Leucine-rich alpha-2-glycoprotein	LRG1
sp|Q13162|PRDX4_HUMAN	Q13162	271	30540	146	Peroxiredoxin-4 OS=Homo sapiens OX=9606 GN=PRDX4 PE=1 SV=1	Peroxiredoxin-4	PRDX4
sp|Q99574|NEUS_HUMAN	Q99574	410	46427	146	Neuroserpin OS=Homo sapiens OX=9606 GN=SERPINI1 PE=1 SV=1	Neuroserpin	SERPINI1
sp|Q14118|DAG1_HUMAN	Q14118	895	97441	145	Dystroglycan 1 OS=Homo sapiens OX=9606 GN=DAG1 PE=1 SV=2	Dystroglycan 1	DAG1
sp|A0A075B6K4|LV310_HUMAN	A0A075B6K4	115	12441	143	Immunoglobulin lambda variable 3-10 OS=Homo sapiens OX=9606 GN=IGLV3-10 PE=3 SV=2	Immunoglobulin lambda variable 3-10	IGLV3-10
sp|P0DJI8|SAA1_HUMAN	P0DJI8	122	13532	141	Serum amyloid A-1 protein OS=Homo sapiens OX=9606 GN=SAA1 PE=1 SV=1	Serum amyloid A-1 protein	SAA1
sp|P02652|APOA2_HUMAN	P02652	100	11175	139	Apolipoprotein A-II OS=Homo sapiens OX=9606 GN=APOA2 PE=1 SV=1	Apolipoprotein A-II	APOA2
sp|P06703|S10A6_HUMAN	P06703	90	10180	138	Protein S100-A6 OS=Homo sapiens OX=9606 GN=S100A6 PE=1 SV=1	Protein S100-A6	S100A6
sp|P15328|FOLR1_HUMAN	P15328	257	29819	138	Folate receptor alpha OS=Homo sapiens OX=9606 GN=FOLR1 PE=1 SV=3	Folate receptor alpha	FOLR1
sp|P19957|ELAF_HUMAN	P19957	117	12270	138	Elafin OS=Homo sapiens OX=9606 GN=PI3 PE=1 SV=3	Elafin	PI3
sp|A0A075B6S2|KVD29_HUMAN;sp|A2NJV5|KV229_HUMAN	A0A075B6S2;A2NJV5	120	13143	137	Immunoglobulin kappa variable 2D-29 OS=Homo sapiens OX=9606 GN=IGKV2D-29 PE=3 SV=1	Immunoglobulin kappa variable 2D-29	IGKV2D-29
sp|P31151|S10A7_HUMAN	P31151	101	11471	137	Protein S100-A7 OS=Homo sapiens OX=9606 GN=S100A7 PE=1 SV=4	Protein S100-A7	S100A7
sp|Q8NFT2|STEA2_HUMAN	Q8NFT2	490	56056	137	Metalloreductase STEAP2 OS=Homo sapiens OX=9606 GN=STEAP2 PE=1 SV=3	Metalloreductase STEAP2	STEAP2
sp|Q16651|PRSS8_HUMAN	Q16651	343	36431	136	Prostasin OS=Homo sapiens OX=9606 GN=PRSS8 PE=1 SV=1	Prostasin	PRSS8
sp|Q8NBJ4|GOLM1_HUMAN	Q8NBJ4	401	45333	135	Golgi membrane protein 1 OS=Homo sapiens OX=9606 GN=GOLM1 PE=1 SV=1	Golgi membrane protein 1	GOLM1
sp|P07996|TSP1_HUMAN	P07996	1170	129383	133	Thrombospondin-1 OS=Homo sapiens OX=9606 GN=THBS1 PE=1 SV=2	Thrombospondin-1	THBS1
sp|P01700|LV147_HUMAN	P01700	117	12284	131	Immunoglobulin lambda variable 1-47 OS=Homo sapiens OX=9606 GN=IGLV1-47 PE=1 SV=2	Immunoglobulin lambda variable 1-47	IGLV1-47
sp|O14773|TPP1_HUMAN	O14773	563	61248	130	Tripeptidyl-peptidase 1 OS=Homo sapiens OX=9606 GN=TPP1 PE=1 SV=2	Tripeptidyl-peptidase 1	TPP1
sp|O43852|CALU_HUMAN	O43852	315	37107	129	Calumenin OS=Homo sapiens OX=9606 GN=CALU PE=1 SV=2	Calumenin	CALU
sp|Q16630|CPSF6_HUMAN	Q16630	551	59210	125	Cleavage and polyadenylation specificity factor subunit 6 OS=Homo sapiens OX=9606 GN=CPSF6 PE=1 SV=2	Cleavage and polyadenylation specificity factor subunit 6	CPSF6
sp|Q92896|GSLG1_HUMAN	Q92896	1179	134552	125	Golgi apparatus protein 1 OS=Homo sapiens OX=9606 GN=GLG1 PE=1 SV=2	Golgi apparatus protein 1	GLG1
sp|A0A0C4DH34|HV428_HUMAN	A0A0C4DH34	117	13124	124	Immunoglobulin heavy variable 4-28 OS=Homo sapiens OX=9606 GN=IGHV4-28 PE=3 SV=1	Immunoglobulin heavy variable 4-28	IGHV4-28
sp|P0DTE1|HV383_HUMAN	P0DTE1	115	12671	122	Probable non-functional immunoglobulin heavy variable 3-38-3 OS=Homo sapiens OX=9606 GN=IGHV3-38-3 PE=1 SV=1	Probable non-functional immunoglobulin heavy variable 3-38-3	IGHV3-38-3
sp|P30101|PDIA3_HUMAN	P30101	505	56782	120	Protein disulfide-isomerase A3 OS=Homo sapiens OX=9606 GN=PDIA3 PE=1 SV=4	Protein disulfide-isomerase A3	PDIA3
sp|P04746|AMYP_HUMAN	P04746	511	57707	119	Pancreatic alpha-amylase OS=Homo sapiens OX=9606 GN=AMY2A PE=1 SV=2	Pancreatic alpha-amylase	AMY2A
sp|O00299|CLIC1_HUMAN	O00299	241	26923	118	Chloride intracellular channel protein 1 OS=Homo sapiens OX=9606 GN=CLIC1 PE=1 SV=4	Chloride intracellular channel protein 1	CLIC1
sp|O60437|PEPL_HUMAN	O60437	1756	204745	118	Periplakin OS=Homo sapiens OX=9606 GN=PPL PE=1 SV=4	Periplakin	PPL
sp|P30044|PRDX5_HUMAN	P30044	214	22086	118	Peroxiredoxin-5, mitochondrial OS=Homo sapiens OX=9606 GN=PRDX5 PE=1 SV=4	Peroxiredoxin-5, mitochondrial	PRDX5
sp|O43490|PROM1_HUMAN	O43490	865	97202	116	Prominin-1 OS=Homo sapiens OX=9606 GN=PROM1 PE=1 SV=1	Prominin-1	PROM1
sp|P04430|KV116_HUMAN	P04430	117	12618	115	Immunoglobulin kappa variable 1-16 OS=Homo sapiens OX=9606 GN=IGKV1-16 PE=1 SV=2	Immunoglobulin kappa variable 1-16	IGKV1-16
sp|P68431|H31_HUMAN;sp|Q71DI3|H32_HUMAN;sp|Q16695|H31T_HUMAN;sp|P84243|H33_HUMAN	P68431;Q71DI3;Q16695;P84243	136	15404	115	Histone H3.1 OS=Homo sapiens OX=9606 GN=H3C1 PE=1 SV=2	Histone H3.1	H3C1
sp|A0A0C4DH68|KV224_HUMAN	A0A0C4DH68	120	13079	108	Immunoglobulin kappa variable 2-24 OS=Homo sapiens OX=9606 GN=IGKV2-24 PE=3 SV=1	Immunoglobulin kappa variable 2-24	IGKV2-24
sp|P02765|FETUA_HUMAN	P02765	367	39341	108	Alpha-2-HS-glycoprotein OS=Homo sapiens OX=9606 GN=AHSG PE=1 SV=2	Alpha-2-HS-glycoprotein	AHSG
sp|Q9UBG3|CRNN_HUMAN	Q9UBG3	495	53533	107	Cornulin OS=Homo sapiens OX=9606 GN=CRNN PE=1 SV=1	Cornulin	CRNN
sp|P07437|TBB5_HUMAN	P07437	444	49671	105	Tubulin beta chain OS=Homo sapiens OX=9606 GN=TUBB PE=1 SV=2	Tubulin beta chain	TUBB
sp|P31749|AKT1_HUMAN	P31749	480	55686	104	RAC-alpha serine/threonine-protein kinase OS=Homo sapiens OX=9606 GN=AKT1 PE=1 SV=2	RAC-alpha serine/threonine-protein kinase	AKT1
sp|P01717|LV325_HUMAN	P01717	112	12011	103	Immunoglobulin lambda variable 3-25 OS=Homo sapiens OX=9606 GN=IGLV3-25 PE=1 SV=2	Immunoglobulin lambda variable 3-25	IGLV3-25
sp|P01762|HV311_HUMAN	P01762	117	12909	102	Immunoglobulin heavy variable 3-11 OS=Homo sapiens OX=9606 GN=IGHV3-11 PE=1 SV=2	Immunoglobulin heavy variable 3-11	IGHV3-11
sp|A0A0B4J1V6|HV373_HUMAN	A0A0B4J1V6	119	12858	101	Immunoglobulin heavy variable 3-73 OS=Homo sapiens OX=9606 GN=IGHV3-73 PE=3 SV=1	Immunoglobulin heavy variable 3-73	IGHV3-73
sp|Q14508|WFDC2_HUMAN	Q14508	124	12993	101	WAP four-disulfide core domain protein 2 OS=Homo sapiens OX=9606 GN=WFDC2 PE=1 SV=2	WAP four-disulfide core domain protein 2	WFDC2
sp|P04004|VTNC_HUMAN	P04004	478	54306	97	Vitronectin OS=Homo sapiens OX=9606 GN=VTN PE=1 SV=1	Vitronectin	VTN
sp|A0A075B6R9|KVD24_HUMAN;sp|A0A0C4DH68|KV224_HUMAN	A0A075B6R9;A0A0C4DH68	120	13079	96	Probable non-functional immunoglobulin kappa variable 2D-24 OS=Homo sapiens OX=9606 GN=IGKV2D-24 PE=1 SV=1	Probable non-functional immunoglobulin kappa variable 2D-24	IGKV2D-24
sp|P00352|AL1A1_HUMAN	P00352	501	54862	96	Aldehyde dehydrogenase 1A1 OS=Homo sapiens OX=9606 GN=ALDH1A1 PE=1 SV=2	Aldehyde dehydrogenase 1A1	ALDH1A1
sp|P23083|HV102_HUMAN	P23083	117	13085	96	Immunoglobulin heavy variable 1-2 OS=Homo sapiens OX=9606 GN=IGHV1-2 PE=1 SV=2	Immunoglobulin heavy variable 1-2	IGHV1-2
sp|A0A0C4DH67|KV108_HUMAN	A0A0C4DH67	115	12537	95	Immunoglobulin kappa variable 1-8 OS=Homo sapiens OX=9606 GN=IGKV1-8 PE=3 SV=1	Immunoglobulin kappa variable 1-8	IGKV1-8
sp|A0A075B6S5|KV127_HUMAN	A0A075B6S5	117	12711	94	Immunoglobulin kappa variable 1-27 OS=Homo sapiens OX=9606 GN=IGKV1-27 PE=3 SV=1	Immunoglobulin kappa variable 1-27	IGKV1-27
sp|A0A0J9YXX1|HV5X1_HUMAN	A0A0J9YXX1	117	12773	94	Immunoglobulin heavy variable 5-10-1 OS=Homo sapiens OX=9606 GN=IGHV5-10-1 PE=3 SV=1	Immunoglobulin heavy variable 5-10-1	IGHV5-10-1
sp|P02679|FIBG_HUMAN	P02679	453	51512	93	Fibrinogen gamma chain OS=Homo sapiens OX=9606 GN=FGG PE=1 SV=3	Fibrinogen gamma chain	FGG
sp|P08311|CATG_HUMAN	P08311	255	28837	93	Cathepsin G OS=Homo sapiens OX=9606 GN=CTSG PE=1 SV=2	Cathepsin G	CTSG
sp|P30838|AL3A1_HUMAN	P30838	453	50395	93	Aldehyde dehydrogenase, dimeric NADP-preferring OS=Homo sapiens OX=9606 GN=ALDH3A1 PE=1 SV=3	Aldehyde dehydrogenase, dimeric NADP-preferring	ALDH3A1
sp|Q13438|OS9_HUMAN	Q13438	667	75562	93	Protein OS-9 OS=Homo sapiens OX=9606 GN=OS9 PE=1 SV=1	Protein-9	OS9
sp|P07686|HEXB_HUMAN	P07686	556	63137	91	Beta-hexosaminidase subunit beta OS=Homo sapiens OX=9606 GN=HEXB PE=1 SV=4	Beta-hexosaminidase subunit beta	HEXB
sp|Q13835|PKP1_HUMAN	Q13835	747	82861	89	Plakophilin-1 OS=Homo sapiens OX=9606 GN=PKP1 PE=1 SV=2	Plakophilin-1	PKP1
sp|P35321|SPR1A_HUMAN	P35321	89	9877	88	Cornifin-A OS=Homo sapiens OX=9606 GN=SPRR1A PE=1 SV=2	Cornifin-A	SPRR1A
sp|Q8WVQ1|CANT1_HUMAN	Q8WVQ1	401	44840	87	Soluble calcium-activated nucleotidase 1 OS=Homo sapiens OX=9606 GN=CANT1 PE=1 SV=1	Soluble calcium-activated nucleotidase 1	CANT1
sp|P0CG38|POTEI_HUMAN	P0CG38	1075	121282	85	POTE ankyrin domain family member I OS=Homo sapiens OX=9606 GN=POTEI PE=3 SV=1	POTE ankyrin domain family member I	POTEI
sp|P00338|LDHA_HUMAN	P00338	332	36689	84	L-lactate dehydrogenase A chain OS=Homo sapiens OX=9606 GN=LDHA PE=1 SV=2	L-lactate dehydrogenase A chain	LDHA
sp|P08758|ANXA5_HUMAN	P08758	320	35937	84	Annexin A5 OS=Homo sapiens OX=9606 GN=ANXA5 PE=1 SV=2	Annexin A5	ANXA5
sp|P31749|AKT1_HUMAN;sp|Q9Y243|AKT3_HUMAN;sp|P31751|AKT2_HUMAN	P31749;Q9Y243;P31751	480	55686	84	RAC-alpha serine/threonine-protein kinase OS=Homo sapiens OX=9606 GN=AKT1 PE=1 SV=2	RAC-alpha serine/threonine-protein kinase	AKT1
sp|P09237|MMP7_HUMAN	P09237	267	29677	83	Matrilysin OS=Homo sapiens OX=9606 GN=MMP7 PE=1 SV=1	Matrilysin	MMP7
sp|Q13867|BLMH_HUMAN	Q13867	455	52562	82	Bleomycin hydrolase OS=Homo sapiens OX=9606 GN=BLMH PE=1 SV=1	Bleomycin hydrolase	BLMH
sp|P02671|FIBA_HUMAN	P02671	866	94973	80	Fibrinogen alpha chain OS=Homo sapiens OX=9606 GN=FGA PE=1 SV=2	Fibrinogen alpha chain	FGA
sp|P12830|CADH1_HUMAN	P12830	882	97456	80	Cadherin-1 OS=Homo sapiens OX=9606 GN=CDH1 PE=1 SV=3	Cadherin-1	CDH1
sp|P19021|AMD_HUMAN	P19021	973	108332	80	Peptidyl-glycine alpha-amidating monooxygenase OS=Homo sapiens OX=9606 GN=PAM PE=1 SV=2	Peptidyl-glycine alpha-amidating monooxygenase	PAM
sp|P07711|CATL1_HUMAN	P07711	333	37564	79	Procathepsin L OS=Homo sapiens OX=9606 GN=CTSL PE=1 SV=2	Procathepsin L	CTSL
sp|Q7Z3Z0|K1C25_HUMAN	Q7Z3Z0	450	49318	79	Keratin, type I cytoskeletal 25 OS=Homo sapiens OX=9606 GN=KRT25 PE=1 SV=1	Keratin, type I cytoskeletal 25	KRT25
sp|A0A075B6K0|LV316_HUMAN	A0A075B6K0	115	12466	78	Immunoglobulin lambda variable 3-16 OS=Homo sapiens OX=9606 GN=IGLV3-16 PE=3 SV=2	Immunoglobulin lambda variable 3-16	IGLV3-16
sp|A0A0A0MT36|KVD21_HUMAN	A0A0A0MT36	114	12340	78	Immunoglobulin kappa variable 6D-21 OS=Homo sapiens OX=9606 GN=IGKV6D-21 PE=3 SV=1	Immunoglobulin kappa variable 6D-21	IGKV6D-21
sp|P22528|SPR1B_HUMAN	P22528	89	9888	77	Cornifin-B OS=Homo sapiens OX=9606 GN=SPRR1B PE=1 SV=2	Cornifin-B	SPRR1B
sp|Q8NCL4|GALT6_HUMAN	Q8NCL4	622	71159	76	Polypeptide N-acetylgalactosaminyltransferase 6 OS=Homo sapiens OX=9606 GN=GALNT6 PE=1 SV=2	Polypeptide N-acetylgalactosaminyltransferase 6	GALNT6
sp|Q9C075|K1C23_HUMAN	Q9C075	422	48131	76	Keratin, type I cytoskeletal 23 OS=Homo sapiens OX=9606 GN=KRT23 PE=1 SV=2	Keratin, type I cytoskeletal 23	KRT23
sp|A0A0C4DH42|HV366_HUMAN;sp|P0DP02|HVC33_HUMAN;sp|P01772|HV333_HUMAN;sp|P01767|HV353_HUMAN	A0A0C4DH42;P0DP02;P01772;P01767	116	12698	73	Immunoglobulin heavy variable 3-66 OS=Homo sapiens OX=9606 GN=IGHV3-66 PE=3 SV=1	Immunoglobulin heavy variable 3-66	IGHV3-66
sp|Q13510|ASAH1_HUMAN	Q13510	395	44660	73	Acid ceramidase OS=Homo sapiens OX=9606 GN=ASAH1 PE=1 SV=5	Acid ceramidase	ASAH1
sp|P23528|COF1_HUMAN	P23528	166	18502	72	Cofilin-1 OS=Homo sapiens OX=9606 GN=CFL1 PE=1 SV=3	Cofilin-1	CFL1
sp|Q9BWS9|CHID1_HUMAN	Q9BWS9	393	44941	72	Chitinase domain-containing protein 1 OS=Homo sapiens OX=9606 GN=CHID1 PE=1 SV=1	Chitinase domain-containing protein 1	CHID1
sp|P01593|KVD33_HUMAN;sp|P01594|KV133_HUMAN	P01593;P01594	117	12848	70	Immunoglobulin kappa variable 1D-33 OS=Homo sapiens OX=9606 GN=IGKV1D-33 PE=1 SV=2	Immunoglobulin kappa variable 1D-33	IGKV1D-33
sp|P61916|NPC2_HUMAN	P61916	151	16570	70	NPC intracellular cholesterol transporter 2 OS=Homo sapiens OX=9606 GN=NPC2 PE=1 SV=1	NPC intracellular cholesterol transporter 2	NPC2
sp|P32119|PRDX2_HUMAN	P32119	198	21892	69	Peroxiredoxin-2 OS=Homo sapiens OX=9606 GN=PRDX2 PE=1 SV=5	Peroxiredoxin-2	PRDX2
sp|P53634|CATC_HUMAN	P53634	463	51854	69	Dipeptidyl peptidase 1 OS=Homo sapiens OX=9606 GN=CTSC PE=1 SV=2	Dipeptidyl peptidase 1	CTSC
sp|P60660|MYL6_HUMAN	P60660	151	16930	69	Myosin light polypeptide 6 OS=Homo sapiens OX=9606 GN=MYL6 PE=1 SV=2	Myosin light polypeptide 6	MYL6
sp|A0A075B6I9|LV746_HUMAN	A0A075B6I9	117	12468	68	Immunoglobulin lambda variable 7-46 OS=Homo sapiens OX=9606 GN=IGLV7-46 PE=3 SV=4	Immunoglobulin lambda variable 7-46	IGLV7-46
sp|P01599|KV117_HUMAN	P01599	117	12779	68	Immunoglobulin kappa variable 1-17 OS=Homo sapiens OX=9606 GN=IGKV1-17 PE=1 SV=2	Immunoglobulin kappa variable 1-17	IGKV1-17
sp|Q13296|SG2A2_HUMAN	Q13296	93	10499	68	Mammaglobin-A OS=Homo sapiens OX=9606 GN=SCGB2A2 PE=1 SV=1	Mammaglobin-A	SCGB2A2
sp|Q9UBC9|SPRR3_HUMAN	Q9UBC9	169	18154	68	Small proline-rich protein 3 OS=Homo sapiens OX=9606 GN=SPRR3 PE=1 SV=2	Small proline-rich protein 3	SPRR3
sp|P01601|KVD16_HUMAN	P01601	117	12730	67	Immunoglobulin kappa variable 1D-16 OS=Homo sapiens OX=9606 GN=IGKV1D-16 PE=3 SV=2	Immunoglobulin kappa variable 1D-16	IGKV1D-16
sp|P01743|HV146_HUMAN	P01743	117	12933	67	Immunoglobulin heavy variable 1-46 OS=Homo sapiens OX=9606 GN=IGHV1-46 PE=1 SV=2	Immunoglobulin heavy variable 1-46	IGHV1-46
sp|Q96DR8|MUCL1_HUMAN	Q96DR8	90	9039	67	Mucin-like protein 1 OS=Homo sapiens OX=9606 GN=MUCL1 PE=1 SV=1	Mucin-like protein 1	MUCL1
sp|P01709|LV208_HUMAN	P01709	118	12382	65	Immunoglobulin lambda variable 2-8 OS=Homo sapiens OX=9606 GN=IGLV2-8 PE=1 SV=2	Immunoglobulin lambda variable 2-8	IGLV2-8
sp|P08582|TRFM_HUMAN	P08582	738	80215	65	Melanotransferrin OS=Homo sapiens OX=9606 GN=MELTF PE=1 SV=2	Melanotransferrin	MELTF
sp|P35579|MYH9_HUMAN	P35579	1960	226530	65	Myosin-9 OS=Homo sapiens OX=9606 GN=MYH9 PE=1 SV=4	Myosin-9	MYH9
sp|P40925|MDHC_HUMAN	P40925	334	36426	65	Malate dehydrogenase, cytoplasmic OS=Homo sapiens OX=9606 GN=MDH1 PE=1 SV=4	Malate dehydrogenase, cytoplasmic	MDH1
sp|Q6KB66|K2C80_HUMAN	Q6KB66	452	50525	65	Keratin, type II cytoskeletal 80 OS=Homo sapiens OX=9606 GN=KRT80 PE=1 SV=2	Keratin, type II cytoskeletal 80	KRT80
sp|P15309|PPAP_HUMAN	P15309	386	44566	64	Prostatic acid phosphatase OS=Homo sapiens OX=9606 GN=ACP3 PE=1 SV=3	Prostatic acid phosphatase	ACP3
sp|A0A075B6I0|LV861_HUMAN	A0A075B6I0	122	12814	63	Immunoglobulin lambda variable 8-61 OS=Homo sapiens OX=9606 GN=IGLV8-61 PE=3 SV=7	Immunoglobulin lambda variable 8-61	IGLV8-61
sp|A0A0C4DH35|HV335_HUMAN	A0A0C4DH35	117	12810	63	Probable non-functional immunoglobulin heavy variable 3-35 OS=Homo sapiens OX=9606 GN=IGHV3-35 PE=1 SV=1	Probable non-functional immunoglobulin heavy variable 3-35	IGHV3-35
sp|A0A0C4DH67|KV108_HUMAN;sp|A0A0C4DH69|KV109_HUMAN	A0A0C4DH67;A0A0C4DH69	115	12537	63	Immunoglobulin kappa variable 1-8 OS=Homo sapiens OX=9606 GN=IGKV1-8 PE=3 SV=1	Immunoglobulin kappa variable 1-8	IGKV1-8
sp|Q5T750|KPLCE_HUMAN	Q5T750	250	26238	63	Protein KPLCE OS=Homo sapiens OX=9606 GN=KPLCE PE=1 SV=1	Protein KPLCE	KPLCE
sp|A0A087WW87|KV240_HUMAN;sp|P01614|KVD40_HUMAN	A0A087WW87;P01614	121	13310	62	Immunoglobulin kappa variable 2-40 OS=Homo sapiens OX=9606 GN=IGKV2-40 PE=3 SV=2	Immunoglobulin kappa variable 2-40	IGKV2-40
sp|P07737|PROF1_HUMAN	P07737	140	15054	62	Profilin-1 OS=Homo sapiens OX=9606 GN=PFN1 PE=1 SV=2	Profilin-1	PFN1
sp|P08670|VIME_HUMAN	P08670	466	53652	62	Vimentin OS=Homo sapiens OX=9606 GN=VIM PE=1 SV=4	Vimentin	VIM
sp|Q02487|DSC2_HUMAN	Q02487	901	99962	61	Desmocollin-2 OS=Homo sapiens OX=9606 GN=DSC2 PE=1 SV=1	Desmocollin-2	DSC2
sp|O43653|PSCA_HUMAN	O43653	114	11959	60	Prostate stem cell antigen OS=Homo sapiens OX=9606 GN=PSCA PE=1 SV=2	Prostate stem cell antigen	PSCA
sp|O60888|CUTA_HUMAN	O60888	179	19116	60	Protein CutA OS=Homo sapiens OX=9606 GN=CUTA PE=1 SV=2	Protein CutA	CUTA
sp|P02545|LMNA_HUMAN	P02545	664	74140	60	Prelamin-A/C OS=Homo sapiens OX=9606 GN=LMNA PE=1 SV=1	Prelamin-A/C	LMNA
sp|Q11201|SIA4A_HUMAN	Q11201	340	39075	60	CMP-N-acetylneuraminate-beta-galactosamide-alpha-2,3-sialyltransferase 1 OS=Homo sapiens OX=9606 GN=ST3GAL1 PE=1 SV=1	CMP-N-acetylneuraminate-beta-galactosamide-alpha-2,3-sialyltransferase 1	ST3GAL1
sp|Q06828|FMOD_HUMAN	Q06828	376	43179	59	Fibromodulin OS=Homo sapiens OX=9606 GN=FMOD PE=1 SV=2	Fibromodulin	FMOD
sp|P0DP01|HV108_HUMAN	P0DP01	117	12992	58	Immunoglobulin heavy variable 1-8 OS=Homo sapiens OX=9606 GN=IGHV1-8 PE=1 SV=1	Immunoglobulin heavy variable 1-8	IGHV1-8
sp|P52209|6PGD_HUMAN	P52209	483	53140	58	6-phosphogluconate dehydrogenase, decarboxylating OS=Homo sapiens OX=9606 GN=PGD PE=1 SV=3	6-phosphogluconate dehydrogenase, decarboxylating	PGD
sp|Q6UXB3|LYPD2_HUMAN	Q6UXB3	125	13115	58	Ly6/PLAUR domain-containing protein 2 OS=Homo sapiens OX=9606 GN=LYPD2 PE=1 SV=1	Ly6/PLAUR domain-containing protein 2	LYPD2
sp|P0DTE7|AMY1B_HUMAN;sp|P19961|AMY2B_HUMAN;sp|P0DUB6|AMY1A_HUMAN;sp|P0DTE8|AMY1C_HUMAN	P0DTE7;P19961;P0DUB6;P0DTE8	511	57768	57	Alpha-amylase 1B OS=Homo sapiens OX=9606 GN=AMY1B PE=1 SV=1	Alpha-amylase 1B	AMY1B
sp|O75888|TNF13_HUMAN	O75888	250	27433	56	Tumor necrosis factor ligand superfamily member 13 OS=Homo sapiens OX=9606 GN=TNFSF13 PE=1 SV=1	Tumor necrosis factor ligand superfamily member 13	TNFSF13
sp|P19652|A1AG2_HUMAN	P19652	201	23603	56	Alpha-1-acid glycoprotein 2 OS=Homo sapiens OX=9606 GN=ORM2 PE=1 SV=2	Alpha-1-acid glycoprotein 2	ORM2
sp|Q92817|EVPL_HUMAN	Q92817	2033	231602	56	Envoplakin OS=Homo sapiens OX=9606 GN=EVPL PE=1 SV=3	Envoplakin	EVPL
sp|A0A075B6K5|LV39_HUMAN;sp|P80748|LV321_HUMAN	A0A075B6K5;P80748	115	12332	55	Immunoglobulin lambda variable 3-9 OS=Homo sapiens OX=9606 GN=IGLV3-9 PE=3 SV=1	Immunoglobulin lambda variable 3-9	IGLV3-9
sp|A0A0B4J2H0|HV69D_HUMAN;sp|P01742|HV169_HUMAN	A0A0B4J2H0;P01742	117	12660	55	Immunoglobulin heavy variable 1-69D OS=Homo sapiens OX=9606 GN=IGHV1-69D PE=1 SV=1	Immunoglobulin heavy variable 1-69D	IGHV1-69D
sp|O14745|NHRF1_HUMAN	O14745	358	38868	55	Na(+)/H(+) exchange regulatory cofactor NHE-RF1 OS=Homo sapiens OX=9606 GN=NHERF1 PE=1 SV=4	Na(+)/H(+) exchange regulatory cofactor NHE-RF1	NHERF1
sp|P01042|KNG1_HUMAN	P01042	644	71957	55	Kininogen-1 OS=Homo sapiens OX=9606 GN=KNG1 PE=1 SV=2	Kininogen-1	KNG1
sp|P04080|CYTB_HUMAN	P04080	98	11140	54	Cystatin-B OS=Homo sapiens OX=9606 GN=CSTB PE=1 SV=2	Cystatin-B	CSTB
sp|P08174|DAF_HUMAN	P08174	381	41400	54	Complement decay-accelerating factor OS=Homo sapiens OX=9606 GN=CD55 PE=1 SV=4	Complement decay-accelerating factor	CD55
sp|Q15293|RCN1_HUMAN	Q15293	331	38890	54	Reticulocalbin-1 OS=Homo sapiens OX=9606 GN=RCN1 PE=1 SV=1	Reticulocalbin-1	RCN1
sp|Q8WXG9|AGRV1_HUMAN	Q8WXG9	6306	693082	54	Adhesion G-protein coupled receptor V1 OS=Homo sapiens OX=9606 GN=ADGRV1 PE=1 SV=2	Adhesion G-protein coupled receptor V1	ADGRV1
sp|Q9UJJ9|GNPTG_HUMAN	Q9UJJ9	305	33974	54	N-acetylglucosamine-1-phosphotransferase subunit gamma OS=Homo sapiens OX=9606 GN=GNPTG PE=1 SV=1	N-acetylglucosamine-1-phosphotransferase subunit gamma	GNPTG
sp|P12259|FA5_HUMAN	P12259	2224	251701	53	Coagulation factor V OS=Homo sapiens OX=9606 GN=F5 PE=1 SV=4	Coagulation factor V	F5
sp|P21741|MK_HUMAN	P21741	143	15585	53	Midkine OS=Homo sapiens OX=9606 GN=MDK PE=1 SV=1	Midkine	MDK
sp|Q92576|PHF3_HUMAN	Q92576	2039	229479	53	PHD finger protein 3 OS=Homo sapiens OX=9606 GN=PHF3 PE=1 SV=3	PHD finger protein 3	PHF3
sp|P06331|HV434_HUMAN	P06331	123	13815	52	Immunoglobulin heavy variable 4-34 OS=Homo sapiens OX=9606 GN=IGHV4-34 PE=1 SV=2	Immunoglobulin heavy variable 4-34	IGHV4-34
sp|P25774|CATS_HUMAN	P25774	331	37496	52	Cathepsin S OS=Homo sapiens OX=9606 GN=CTSS PE=1 SV=3	Cathepsin S	CTSS
sp|Q96EU7|C1GLC_HUMAN	Q96EU7	318	36382	52	C1GALT1-specific chaperone 1 OS=Homo sapiens OX=9606 GN=C1GALT1C1 PE=1 SV=1	C1GALT1-specific chaperone 1	C1GALT1C1
sp|P31946|1433B_HUMAN	P31946	246	28082	51	14-3-3 protein beta/alpha OS=Homo sapiens OX=9606 GN=YWHAB PE=1 SV=3	14-3-3 protein beta/alpha	YWHAB
sp|A0A087WSY4|HV432_HUMAN	A0A087WSY4	118	13025	50	Immunoglobulin heavy variable 4-30-2 OS=Homo sapiens OX=9606 GN=IGHV4-30-2 PE=3 SV=1	Immunoglobulin heavy variable 4-30-2	IGHV4-30-2
sp|P01772|HV333_HUMAN;sp|P0DP02|HVC33_HUMAN	P01772;P0DP02	117	13074	50	Immunoglobulin heavy variable 3-33 OS=Homo sapiens OX=9606 GN=IGHV3-33 PE=1 SV=2	Immunoglobulin heavy variable 3-33	IGHV3-33
sp|P0C0L4|CO4A_HUMAN;sp|P0C0L5|CO4B_HUMAN	P0C0L4;P0C0L5	1744	192784	50	Complement C4-A OS=Homo sapiens OX=9606 GN=C4A PE=1 SV=2	Complement C4-A	C4A
sp|P15291|B4GT1_HUMAN	P15291	398	43920	50	Beta-1,4-galactosyltransferase 1 OS=Homo sapiens OX=9606 GN=B4GALT1 PE=1 SV=5	Beta-1,4-galactosyltransferase 1	B4GALT1
sp|P21980|TGM2_HUMAN	P21980	687	77329	50	Protein-glutamine gamma-glutamyltransferase 2 OS=Homo sapiens OX=9606 GN=TGM2 PE=1 SV=2	Protein-glutamine gamma-glutamyltransferase 2	TGM2
sp|Q8WUM4|PDC6I_HUMAN	Q8WUM4	868	96023	50	Programmed cell death 6-interacting protein OS=Homo sapiens OX=9606 GN=PDCD6IP PE=1 SV=1	Programmed cell death 6-interacting protein	PDCD6IP
sp|O75629|CREG1_HUMAN	O75629	220	24075	49	Protein CREG1 OS=Homo sapiens OX=9606 GN=CREG1 PE=1 SV=1	Protein CREG1	CREG1
sp|O95436|NPT2B_HUMAN	O95436	690	75759	49	Sodium-dependent phosphate transport protein 2B OS=Homo sapiens OX=9606 GN=SLC34A2 PE=1 SV=3	Sodium-dependent phosphate transport protein 2B	SLC34A2
sp|Q08431|MFGM_HUMAN	Q08431	387	43105	49	Lactadherin OS=Homo sapiens OX=9606 GN=MFGE8 PE=1 SV=3	Lactadherin	MFGE8
sp|O95994|AGR2_HUMAN	O95994	175	19979	48	Anterior gradient protein 2 homolog OS=Homo sapiens OX=9606 GN=AGR2 PE=1 SV=1	Anterior gradient protein 2 homolog	AGR2
sp|Q08188|TGM3_HUMAN	Q08188	693	76632	48	Protein-glutamine gamma-glutamyltransferase E OS=Homo sapiens OX=9606 GN=TGM3 PE=1 SV=4	Protein-glutamine gamma-glutamyltransferase E	TGM3
sp|Q9H173|SIL1_HUMAN	Q9H173	461	52085	48	Nucleotide exchange factor SIL1 OS=Homo sapiens OX=9606 GN=SIL1 PE=1 SV=1	Nucleotide exchange factor SIL1	SIL1
sp|P58499|FAM3B_HUMAN	P58499	235	25982	47	Protein FAM3B OS=Homo sapiens OX=9606 GN=FAM3B PE=1 SV=2	Protein FAM3B	FAM3B
sp|P0CG39|POTEJ_HUMAN	P0CG39	1038	117390	46	POTE ankyrin domain family member J OS=Homo sapiens OX=9606 GN=POTEJ PE=3 SV=1	POTE ankyrin domain family member J	POTEJ
sp|P26038|MOES_HUMAN	P26038	577	67820	46	Moesin OS=Homo sapiens OX=9606 GN=MSN PE=1 SV=3	Moesin	MSN
sp|A0A075B6J9|LV218_HUMAN	A0A075B6J9	118	12412	45	Immunoglobulin lambda variable 2-18 OS=Homo sapiens OX=9606 GN=IGLV2-18 PE=3 SV=2	Immunoglobulin lambda variable 2-18	IGLV2-18
sp|P0DJI9|SAA2_HUMAN	P0DJI9	122	13527	45	Serum amyloid A-2 protein OS=Homo sapiens OX=9606 GN=SAA2 PE=1 SV=1	Serum amyloid A-2 protein	SAA2
sp|P37837|TALDO_HUMAN	P37837	337	37540	45	Transaldolase OS=Homo sapiens OX=9606 GN=TALDO1 PE=1 SV=2	Transaldolase	TALDO1
sp|P40394|ADH7_HUMAN	P40394	386	41481	45	All-trans-retinol dehydrogenase [NAD(+)] ADH7 OS=Homo sapiens OX=9606 GN=ADH7 PE=1 SV=2	All-trans-retinol dehydrogenase [NAD(+)] ADH7	ADH7
sp|Q9HCY8|S10AE_HUMAN	Q9HCY8	104	11662	45	Protein S100-A14 OS=Homo sapiens OX=9606 GN=S100A14 PE=1 SV=1	Protein S100-A14	S100A14
sp|P05186|PPBT_HUMAN	P05186	524	57305	44	Alkaline phosphatase, tissue-nonspecific isozyme OS=Homo sapiens OX=9606 GN=ALPL PE=1 SV=4	Alkaline phosphatase, tissue-nonspecific isozyme	ALPL
sp|Q6NUJ1|SAPL1_HUMAN	Q6NUJ1	521	56627	44	Proactivator polypeptide-like 1 OS=Homo sapiens OX=9606 GN=PSAPL1 PE=2 SV=2	Proactivator polypeptide-like 1	PSAPL1
sp|Q8WVV4|POF1B_HUMAN	Q8WVV4	589	68065	44	Protein POF1B OS=Homo sapiens OX=9606 GN=POF1B PE=1 SV=3	Protein POF1B	POF1B
sp|Q9NRJ3|CCL28_HUMAN	Q9NRJ3	127	14280	44	C-C motif chemokine 28 OS=Homo sapiens OX=9606 GN=CCL28 PE=1 SV=1	C-C motif chemokine 28	CCL28
sp|P14625|ENPL_HUMAN	P14625	803	92469	43	Endoplasmin OS=Homo sapiens OX=9606 GN=HSP90B1 PE=1 SV=1	Endoplasmin	HSP90B1
sp|P18669|PGAM1_HUMAN	P18669	254	28804	43	Phosphoglycerate mutase 1 OS=Homo sapiens OX=9606 GN=PGAM1 PE=1 SV=2	Phosphoglycerate mutase 1	PGAM1
sp|P23284|PPIB_HUMAN	P23284	216	23743	43	Peptidyl-prolyl cis-trans isomerase B OS=Homo sapiens OX=9606 GN=PPIB PE=1 SV=2	Peptidyl-prolyl cis-trans isomerase B	PPIB
sp|P10412|H14_HUMAN;sp|P16403|H12_HUMAN;sp|P16402|H13_HUMAN	P10412;P16403;P16402	219	21865	42	Histone H1.4 OS=Homo sapiens OX=9606 GN=H1-4 PE=1 SV=2	Histone H1.4	H1-4
sp|P15144|AMPN_HUMAN	P15144	967	109539	42	Aminopeptidase N OS=Homo sapiens OX=9606 GN=ANPEP PE=1 SV=4	Aminopeptidase N	ANPEP
sp|A0A075B6S2|KVD29_HUMAN;sp|A2NJV5|KV229_HUMAN;sp|A0A0A0MRZ7|KVD26_HUMAN	A0A075B6S2;A2NJV5;A0A0A0MRZ7	120	13143	41	Immunoglobulin kappa variable 2D-29 OS=Homo sapiens OX=9606 GN=IGKV2D-29 PE=3 SV=1	Immunoglobulin kappa variable 2D-29	IGKV2D-29
sp|A0A0C4DH24|KV621_HUMAN	A0A0C4DH24	114	12430	41	Immunoglobulin kappa variable 6-21 OS=Homo sapiens OX=9606 GN=IGKV6-21 PE=3 SV=1	Immunoglobulin kappa variable 6-21	IGKV6-21
sp|A5A3E0|POTEF_HUMAN;sp|Q6S8J3|POTEE_HUMAN	A5A3E0;Q6S8J3	1075	121444	41	POTE ankyrin domain family member F OS=Homo sapiens OX=9606 GN=POTEF PE=1 SV=2	POTE ankyrin domain family member F	POTEF
sp|O95841|ANGL1_HUMAN	O95841	491	56720	41	Angiopoietin-related protein 1 OS=Homo sapiens OX=9606 GN=ANGPTL1 PE=2 SV=1	Angiopoietin-related protein 1	ANGPTL1
sp|P01701|LV151_HUMAN	P01701	117	12249	41	Immunoglobulin lambda variable 1-51 OS=Homo sapiens OX=9606 GN=IGLV1-51 PE=1 SV=2	Immunoglobulin lambda variable 1-51	IGLV1-51
sp|P01704|LV214_HUMAN	P01704	120	12597	41	Immunoglobulin lambda variable 2-14 OS=Homo sapiens OX=9606 GN=IGLV2-14 PE=1 SV=2	Immunoglobulin lambda variable 2-14	IGLV2-14
sp|P05156|CFAI_HUMAN	P05156	583	65750	41	Complement factor I OS=Homo sapiens OX=9606 GN=CFI PE=1 SV=2	Complement factor I	CFI
sp|P27482|CALL3_HUMAN	P27482	149	16891	41	Calmodulin-like protein 3 OS=Homo sapiens OX=9606 GN=CALML3 PE=1 SV=2	Calmodulin-like protein 3	CALML3
sp|P29401|TKT_HUMAN	P29401	623	67878	41	Transketolase OS=Homo sapiens OX=9606 GN=TKT PE=1 SV=3	Transketolase	TKT
sp|P01706|LV211_HUMAN	P01706	119	12644	40	Immunoglobulin lambda variable 2-11 OS=Homo sapiens OX=9606 GN=IGLV2-11 PE=1 SV=2	Immunoglobulin lambda variable 2-11	IGLV2-11
sp|P09958|FURIN_HUMAN	P09958	794	86678	40	Furin OS=Homo sapiens OX=9606 GN=FURIN PE=1 SV=2	Furin	FURIN
sp|Q7Z406|MYH14_HUMAN	Q7Z406	1995	227868	40	Myosin-14 OS=Homo sapiens OX=9606 GN=MYH14 PE=1 SV=2	Myosin-14	MYH14
sp|O60911|CATL2_HUMAN	O60911	334	37329	39	Cathepsin L2 OS=Homo sapiens OX=9606 GN=CTSV PE=1 SV=2	Cathepsin L2	CTSV
sp|P04155|TFF1_HUMAN	P04155	84	9149	39	Trefoil factor 1 OS=Homo sapiens OX=9606 GN=TFF1 PE=1 SV=1	Trefoil factor 1	TFF1
sp|P05155|IC1_HUMAN	P05155	500	55154	39	Plasma protease C1 inhibitor OS=Homo sapiens OX=9606 GN=SERPING1 PE=1 SV=2	Plasma protease C1 inhibitor	SERPING1
sp|P36952|SPB5_HUMAN	P36952	375	42100	39	Serpin B5 OS=Homo sapiens OX=9606 GN=SERPINB5 PE=1 SV=2	Serpin B5	SERPINB5
sp|Q8NES3|LFNG_HUMAN	Q8NES3	379	41773	39	Beta-1,3-N-acetylglucosaminyltransferase lunatic fringe OS=Homo sapiens OX=9606 GN=LFNG PE=1 SV=2	Beta-1,3-N-acetylglucosaminyltransferase lunatic fringe	LFNG
sp|Q9NRA1|PDGFC_HUMAN	Q9NRA1	345	39029	39	Platelet-derived growth factor C OS=Homo sapiens OX=9606 GN=PDGFC PE=1 SV=2	Platelet-derived growth factor C	PDGFC
sp|Q9Y4L1|HYOU1_HUMAN	Q9Y4L1	999	111335	39	Hypoxia up-regulated protein 1 OS=Homo sapiens OX=9606 GN=HYOU1 PE=1 SV=1	Hypoxia up-regulated protein 1	HYOU1
sp|P0DP23|CALM1_HUMAN;sp|P0DP25|CALM3_HUMAN;sp|P0DP24|CALM2_HUMAN	P0DP23;P0DP25;P0DP24	149	16838	38	Calmodulin-1 OS=Homo sapiens OX=9606 GN=CALM1 PE=1 SV=1	Calmodulin-1	CALM1
sp|P54108|CRIS3_HUMAN	P54108	245	27630	38	Cysteine-rich secretory protein 3 OS=Homo sapiens OX=9606 GN=CRISP3 PE=1 SV=1	Cysteine-rich secretory protein 3	CRISP3
sp|Q01459|DIAC_HUMAN	Q01459	385	43760	38	Di-N-acetylchitobiase OS=Homo sapiens OX=9606 GN=CTBS PE=1 SV=1	Di-N-acetylchitobiase	CTBS
sp|A0A0B4J1U7|HV601_HUMAN	A0A0B4J1U7	121	13481	37	Immunoglobulin heavy variable 6-1 OS=Homo sapiens OX=9606 GN=IGHV6-1 PE=3 SV=1	Immunoglobulin heavy variable 6-1	IGHV6-1
sp|O95395|GCNT3_HUMAN	O95395	438	50864	37	Beta-1,3-galactosyl-O-glycosyl-glycoprotein beta-1,6-N-acetylglucosaminyltransferase 3 OS=Homo sapiens OX=9606 GN=GCNT3 PE=2 SV=1	Beta-1,3-galactosyl-O-glycosyl-glycoprotein beta-1,6-N-acetylglucosaminyltransferase 3	GCNT3
sp|P02753|RET4_HUMAN	P02753	201	23010	37	Retinol-binding protein 4 OS=Homo sapiens OX=9606 GN=RBP4 PE=1 SV=3	Retinol-binding protein 4	RBP4
sp|P06753|TPM3_HUMAN	P06753	285	32950	37	Tropomyosin alpha-3 chain OS=Homo sapiens OX=9606 GN=TPM3 PE=1 SV=2	Tropomyosin alpha-3 chain	TPM3
sp|P12109|CO6A1_HUMAN	P12109	1028	108529	37	Collagen alpha-1(VI) chain OS=Homo sapiens OX=9606 GN=COL6A1 PE=1 SV=3	Collagen alpha-1(VI) chain	COL6A1
sp|P25815|S100P_HUMAN	P25815	95	10400	37	Protein S100-P OS=Homo sapiens OX=9606 GN=S100P PE=1 SV=2	Protein S100-P	S100P
sp|P68363|TBA1B_HUMAN	P68363	451	50152	37	Tubulin alpha-1B chain OS=Homo sapiens OX=9606 GN=TUBA1B PE=1 SV=1	Tubulin alpha-1B chain	TUBA1B
sp|Q15517|CDSN_HUMAN	Q15517	529	51522	37	Corneodesmosin OS=Homo sapiens OX=9606 GN=CDSN PE=1 SV=3	Corneodesmosin	CDSN
sp|Q96LB3|IFT74_HUMAN	Q96LB3	600	69239	37	Intraflagellar transport protein 74 homolog OS=Homo sapiens OX=9606 GN=IFT74 PE=1 SV=1	Intraflagellar transport protein 74 homolog	IFT74
sp|O60814|H2B1K_HUMAN;sp|Q99880|H2B1L_HUMAN;sp|Q99879|H2B1M_HUMAN;sp|Q99877|H2B1N_HUMAN;sp|Q93079|H2B1H_HUMAN;sp|Q8N257|H2B3B_HUMAN;sp|Q5QNW6|H2B2F_HUMAN;sp|Q16778|H2B2E_HUMAN;sp|P62807|H2B1C_HUMAN;sp|P58876|H2B1D_HUMAN;sp|P57053|H2BFS_HUMAN;sp|P33778|H2B1B_HUMAN;sp|P23527|H2B1O_HUMAN;sp|P06899|H2B1J_HUMAN	O60814;Q99880;Q99879;Q99877;Q93079;Q8N257;Q5QNW6;Q16778;P62807;P58876;P57053;P33778;P23527;P06899	126	13890	36	Histone H2B type 1-K OS=Homo sapiens OX=9606 GN=H2BC12 PE=1 SV=3	Histone H2B type 1-K	H2BC12
sp|P02656|APOC3_HUMAN	P02656	99	10852	36	Apolipoprotein C-III OS=Homo sapiens OX=9606 GN=APOC3 PE=1 SV=1	Apolipoprotein C-III	APOC3
sp|P21926|CD9_HUMAN	P21926	228	25416	36	CD9 antigen OS=Homo sapiens OX=9606 GN=CD9 PE=1 SV=4	CD9 antigen	CD9
sp|Q04609|FOLH1_HUMAN	Q04609	750	84331	36	Glutamate carboxypeptidase 2 OS=Homo sapiens OX=9606 GN=FOLH1 PE=1 SV=1	Glutamate carboxypeptidase 2	FOLH1
sp|P15104|GLNA_HUMAN	P15104	373	42064	35	Glutamine synthetase OS=Homo sapiens OX=9606 GN=GLUL PE=1 SV=4	Glutamine synthetase	GLUL
sp|A0A0B4J2H0|HV69D_HUMAN;sp|P0DP01|HV108_HUMAN;sp|P01743|HV146_HUMAN;sp|P01742|HV169_HUMAN;sp|A0A0C4DH29|HV103_HUMAN	A0A0B4J2H0;P0DP01;P01743;P01742;A0A0C4DH29	117	12660	34	Immunoglobulin heavy variable 1-69D OS=Homo sapiens OX=9606 GN=IGHV1-69D PE=1 SV=1	Immunoglobulin heavy variable 1-69D	IGHV1-69D
sp|B0FP48|UPK3L_HUMAN;sp|E5RIL1|UPKL2_HUMAN	B0FP48;E5RIL1	263	28385	34	Uroplakin-3b-like protein 1 OS=Homo sapiens OX=9606 GN=UPK3BL1 PE=2 SV=1	Uroplakin-3b-like protein 1	UPK3BL1
sp|P01008|ANT3_HUMAN	P01008	464	52602	34	Antithrombin-III OS=Homo sapiens OX=9606 GN=SERPINC1 PE=1 SV=1	Antithrombin-III	SERPINC1
sp|P02649|APOE_HUMAN	P02649	317	36154	34	Apolipoprotein E OS=Homo sapiens OX=9606 GN=APOE PE=1 SV=1	Apolipoprotein E	APOE
sp|P04040|CATA_HUMAN	P04040	527	59756	34	Catalase OS=Homo sapiens OX=9606 GN=CAT PE=1 SV=3	Catalase	CAT
sp|P16070|CD44_HUMAN	P16070	742	81538	34	CD44 antigen OS=Homo sapiens OX=9606 GN=CD44 PE=1 SV=3	CD44 antigen	CD44
sp|P50395|GDIB_HUMAN	P50395	445	50663	34	Rab GDP dissociation inhibitor beta OS=Homo sapiens OX=9606 GN=GDI2 PE=1 SV=2	Rab GDP dissociation inhibitor beta	GDI2
sp|P60953|CDC42_HUMAN	P60953	191	21259	34	Cell division control protein 42 homolog OS=Homo sapiens OX=9606 GN=CDC42 PE=1 SV=2	Cell division control protein 42 homolog	CDC42
sp|Q7RTS7|K2C74_HUMAN	Q7RTS7	529	57865	34	Keratin, type II cytoskeletal 74 OS=Homo sapiens OX=9606 GN=KRT74 PE=1 SV=2	Keratin, type II cytoskeletal 74	KRT74
sp|Q8NCM8|DYHC2_HUMAN	Q8NCM8	4307	492627	34	Cytoplasmic dynein 2 heavy chain 1 OS=Homo sapiens OX=9606 GN=DYNC2H1 PE=1 SV=4	Cytoplasmic dynein 2 heavy chain 1	DYNC2H1
sp|Q99538|LGMN_HUMAN	Q99538	433	49411	34	Legumain OS=Homo sapiens OX=9606 GN=LGMN PE=1 SV=1	Legumain	LGMN
sp|A0A0C4DH43|HV70D_HUMAN	A0A0C4DH43	119	13312	33	Immunoglobulin heavy variable 2-70D OS=Homo sapiens OX=9606 GN=IGHV2-70D PE=3 SV=1	Immunoglobulin heavy variable 2-70D	IGHV2-70D
sp|P01764|HV323_HUMAN;sp|P0DP03|HVC05_HUMAN;sp|P01768|HV330_HUMAN	P01764;P0DP03;P01768	117	12582	33	Immunoglobulin heavy variable 3-23 OS=Homo sapiens OX=9606 GN=IGHV3-23 PE=1 SV=2	Immunoglobulin heavy variable 3-23	IGHV3-23
sp|P04003|C4BPA_HUMAN	P04003	597	67033	33	C4b-binding protein alpha chain OS=Homo sapiens OX=9606 GN=C4BPA PE=1 SV=2	C4b-binding protein alpha chain	C4BPA
sp|P43251|BTD_HUMAN	P43251	543	61133	33	Biotinidase OS=Homo sapiens OX=9606 GN=BTD PE=1 SV=2	Biotinidase	BTD
sp|Q8NBJ7|SUMF2_HUMAN	Q8NBJ7	301	33843	33	Inactive C-alpha-formylglycine-generating enzyme 2 OS=Homo sapiens OX=9606 GN=SUMF2 PE=1 SV=2	Inactive C-alpha-formylglycine-generating enzyme 2	SUMF2
sp|O75874|IDHC_HUMAN	O75874	414	46659	32	Isocitrate dehydrogenase [NADP] cytoplasmic OS=Homo sapiens OX=9606 GN=IDH1 PE=1 SV=2	Isocitrate dehydrogenase [NADP] cytoplasmic	IDH1
sp|P35442|TSP2_HUMAN	P35442	1172	129991	32	Thrombospondin-2 OS=Homo sapiens OX=9606 GN=THBS2 PE=1 SV=2	Thrombospondin-2	THBS2
sp|Q6UWP8|SBSN_HUMAN	Q6UWP8	590	60541	32	Suprabasin OS=Homo sapiens OX=9606 GN=SBSN PE=1 SV=2	Suprabasin	SBSN
sp|A0A0C4DH38|HV551_HUMAN	A0A0C4DH38	117	12675	31	Immunoglobulin heavy variable 5-51 OS=Homo sapiens OX=9606 GN=IGHV5-51 PE=3 SV=1	Immunoglobulin heavy variable 5-51	IGHV5-51
sp|P16401|H15_HUMAN	P16401	226	22580	31	Histone H1.5 OS=Homo sapiens OX=9606 GN=H1-5 PE=1 SV=3	Histone H1.5	H1-5
sp|P27348|1433T_HUMAN	P27348	245	27764	31	14-3-3 protein theta OS=Homo sapiens OX=9606 GN=YWHAQ PE=1 SV=1	14-3-3 protein theta	YWHAQ
sp|P48723|HSP13_HUMAN	P48723	471	51928	31	Heat shock 70 kDa protein 13 OS=Homo sapiens OX=9606 GN=HSPA13 PE=1 SV=1	Heat shock 70 kDa protein 13	HSPA13
sp|Q86SQ4|AGRG6_HUMAN	Q86SQ4	1221	136694	31	Adhesion G-protein coupled receptor G6 OS=Homo sapiens OX=9606 GN=ADGRG6 PE=1 SV=3	Adhesion G-protein coupled receptor G6	ADGRG6
sp|A0A0A0MS14|HV145_HUMAN	A0A0A0MS14	117	13508	30	Immunoglobulin heavy variable 1-45 OS=Homo sapiens OX=9606 GN=IGHV1-45 PE=3 SV=1	Immunoglobulin heavy variable 1-45	IGHV1-45
sp|P01703|LV140_HUMAN	P01703	118	12302	30	Immunoglobulin lambda variable 1-40 OS=Homo sapiens OX=9606 GN=IGLV1-40 PE=1 SV=2	Immunoglobulin lambda variable 1-40	IGLV1-40
sp|P04746|AMYP_HUMAN;sp|P19961|AMY2B_HUMAN;sp|P0DUB6|AMY1A_HUMAN;sp|P0DTE8|AMY1C_HUMAN;sp|P0DTE7|AMY1B_HUMAN	P04746;P19961;P0DUB6;P0DTE8;P0DTE7	511	57707	30	Pancreatic alpha-amylase OS=Homo sapiens OX=9606 GN=AMY2A PE=1 SV=2	Pancreatic alpha-amylase	AMY2A
sp|P13639|EF2_HUMAN	P13639	858	95338	30	Elongation factor 2 OS=Homo sapiens OX=9606 GN=EEF2 PE=1 SV=4	Elongation factor 2	EEF2
sp|P16035|TIMP2_HUMAN	P16035	220	24399	30	Metalloproteinase inhibitor 2 OS=Homo sapiens OX=9606 GN=TIMP2 PE=1 SV=2	Metalloproteinase inhibitor 2	TIMP2
sp|P50453|SPB9_HUMAN	P50453	376	42404	30	Serpin B9 OS=Homo sapiens OX=9606 GN=SERPINB9 PE=1 SV=1	Serpin B9	SERPINB9
sp|Q9HCE5|MET14_HUMAN	Q9HCE5	456	52150	30	N6-adenosine-methyltransferase non-catalytic subunit OS=Homo sapiens OX=9606 GN=METTL14 PE=1 SV=2	N6-adenosine-methyltransferase non-catalytic subunit	METTL14
sp|P62258|1433E_HUMAN	P62258	255	29174	29	14-3-3 protein epsilon OS=Homo sapiens OX=9606 GN=YWHAE PE=1 SV=1	14-3-3 protein epsilon	YWHAE
sp|Q9NZP8|C1RL_HUMAN	Q9NZP8	487	53498	29	Complement C1r subcomponent-like protein OS=Homo sapiens OX=9606 GN=C1RL PE=1 SV=2	Complement C1r subcomponent-like protein	C1RL
sp|A0A075B6S5|KV127_HUMAN;sp|A0A0C4DH69|KV109_HUMAN;sp|A0A0C4DH67|KV108_HUMAN	A0A075B6S5;A0A0C4DH69;A0A0C4DH67	117	12711	28	Immunoglobulin kappa variable 1-27 OS=Homo sapiens OX=9606 GN=IGKV1-27 PE=3 SV=1	Immunoglobulin kappa variable 1-27	IGKV1-27
sp|P00734|THRB_HUMAN	P00734	622	70037	28	Prothrombin OS=Homo sapiens OX=9606 GN=F2 PE=1 SV=2	Prothrombin	F2
sp|P10412|H14_HUMAN;sp|P16402|H13_HUMAN	P10412;P16402	219	21865	28	Histone H1.4 OS=Homo sapiens OX=9606 GN=H1-4 PE=1 SV=2	Histone H1.4	H1-4
sp|P21675|TAF1_HUMAN	P21675	1893	214712	28	Transcription initiation factor TFIID subunit 1 OS=Homo sapiens OX=9606 GN=TAF1 PE=1 SV=3	Transcription initiation factor TFIID subunit 1	TAF1
sp|P28325|CYTD_HUMAN	P28325	142	16080	28	Cystatin-D OS=Homo sapiens OX=9606 GN=CST5 PE=1 SV=1	Cystatin-D	CST5
sp|Q86WT1|IT70A_HUMAN;sp|Q8N4P2|IT70B_HUMAN	Q86WT1;Q8N4P2	665	76136	28	Intraflagellar transport protein 70A OS=Homo sapiens OX=9606 GN=IFT70A PE=2 SV=3	Intraflagellar transport protein 70A	IFT70A
sp|Q8WXI7|MUC16_HUMAN	Q8WXI7	14507	1519216	28	Mucin-16 OS=Homo sapiens OX=9606 GN=MUC16 PE=1 SV=3	Mucin-16	MUC16
sp|Q99497|PARK7_HUMAN	Q99497	189	19891	28	Parkinson disease protein 7 OS=Homo sapiens OX=9606 GN=PARK7 PE=1 SV=2	Parkinson disease protein 7	PARK7
sp|Q9NZT1|CALL5_HUMAN	Q9NZT1	146	15892	28	Calmodulin-like protein 5 OS=Homo sapiens OX=9606 GN=CALML5 PE=1 SV=2	Calmodulin-like protein 5	CALML5
sp|P06744|G6PI_HUMAN	P06744	558	63147	27	Glucose-6-phosphate isomerase OS=Homo sapiens OX=9606 GN=GPI PE=1 SV=4	Glucose-6-phosphate isomerase	GPI
sp|P23490|LORI_HUMAN	P23490	312	25761	27	Loricrin OS=Homo sapiens OX=9606 GN=LORICRIN PE=1 SV=2	Loricrin	LORICRIN
sp|Q96N23|CFA54_HUMAN	Q96N23	3096	351970	27	Cilia- and flagella-associated protein 54 OS=Homo sapiens OX=9606 GN=CFAP54 PE=2 SV=3	Cilia- and flagella-associated protein 54	CFAP54
sp|O75094|SLIT3_HUMAN	O75094	1523	167712	26	Slit homolog 3 protein OS=Homo sapiens OX=9606 GN=SLIT3 PE=2 SV=3	Slit homolog 3 protein	SLIT3
sp|P04439|HLAA_HUMAN	P04439	365	40841	26	HLA class I histocompatibility antigen, A alpha chain OS=Homo sapiens OX=9606 GN=HLA-A PE=1 SV=2	HLA class I histocompatibility antigen, A alpha chain	HLA-A
sp|P04908|H2A1B_HUMAN;sp|Q93077|H2A1C_HUMAN;sp|Q7L7L0|H2A3_HUMAN	P04908;Q93077;Q7L7L0	130	14135	26	Histone H2A type 1-B/E OS=Homo sapiens OX=9606 GN=H2AC4 PE=1 SV=2	Histone H2A type 1-B/E	H2AC4
sp|P08246|ELNE_HUMAN	P08246	267	28518	26	Neutrophil elastase OS=Homo sapiens OX=9606 GN=ELANE PE=1 SV=1	Neutrophil elastase	ELANE
sp|P12036|NFH_HUMAN	P12036	1026	112479	26	Neurofilament heavy polypeptide OS=Homo sapiens OX=9606 GN=NEFH PE=1 SV=4	Neurofilament heavy polypeptide	NEFH
sp|P15907|SIAT1_HUMAN	P15907	406	46605	26	Beta-galactoside alpha-2,6-sialyltransferase 1 OS=Homo sapiens OX=9606 GN=ST6GAL1 PE=1 SV=1	Beta-galactoside alpha-2,6-sialyltransferase 1	ST6GAL1
sp|P27797|CALR_HUMAN	P27797	417	48142	26	Calreticulin OS=Homo sapiens OX=9606 GN=CALR PE=1 SV=1	Calreticulin	CALR
sp|P34931|HS71L_HUMAN	P34931	641	70375	26	Heat shock 70 kDa protein 1-like OS=Homo sapiens OX=9606 GN=HSPA1L PE=1 SV=2	Heat shock 70 kDa protein 1-like	HSPA1L
sp|P55064|AQP5_HUMAN	P55064	265	28292	26	Aquaporin-5 OS=Homo sapiens OX=9606 GN=AQP5 PE=1 SV=1	Aquaporin-5	AQP5
sp|Q96P63|SPB12_HUMAN	Q96P63	405	46276	26	Serpin B12 OS=Homo sapiens OX=9606 GN=SERPINB12 PE=1 SV=1	Serpin B12	SERPINB12
sp|A6NMY6|AXA2L_HUMAN	A6NMY6	339	38659	25	Putative annexin A2-like protein OS=Homo sapiens OX=9606 GN=ANXA2P2 PE=5 SV=2	Putative annexin A2-like protein	ANXA2P2
sp|P61586|RHOA_HUMAN	P61586	193	21768	25	Transforming protein RhoA OS=Homo sapiens OX=9606 GN=RHOA PE=1 SV=1	Transforming protein RhoA	RHOA
sp|Q86SF2|GALT7_HUMAN	Q86SF2	657	75389	25	N-acetylgalactosaminyltransferase 7 OS=Homo sapiens OX=9606 GN=GALNT7 PE=1 SV=1	N-acetylgalactosaminyltransferase 7	GALNT7
sp|Q8IZX4|TAF1L_HUMAN	Q8IZX4	1826	207300	25	Transcription initiation factor TFIID subunit 1-like OS=Homo sapiens OX=9606 GN=TAF1L PE=1 SV=1	Transcription initiation factor TFIID subunit 1-like	TAF1L
sp|Q9GZM7|TINAL_HUMAN	Q9GZM7	467	52387	25	Tubulointerstitial nephritis antigen-like OS=Homo sapiens OX=9606 GN=TINAGL1 PE=1 SV=1	Tubulointerstitial nephritis antigen-like	TINAGL1
sp|A0A0B4J1V2|HV226_HUMAN	A0A0B4J1V2	119	13182	24	Immunoglobulin heavy variable 2-26 OS=Homo sapiens OX=9606 GN=IGHV2-26 PE=3 SV=1	Immunoglobulin heavy variable 2-26	IGHV2-26
sp|P07476|INVO_HUMAN	P07476	585	68479	24	Involucrin OS=Homo sapiens OX=9606 GN=IVL PE=1 SV=2	Involucrin	IVL
sp|P08238|HS90B_HUMAN	P08238	724	83264	24	Heat shock protein HSP 90-beta OS=Homo sapiens OX=9606 GN=HSP90AB1 PE=1 SV=4	Heat shock protein HSP 90-beta	HSP90AB1
sp|P24158|PRTN3_HUMAN	P24158	256	27807	24	Myeloblastin OS=Homo sapiens OX=9606 GN=PRTN3 PE=1 SV=3	Myeloblastin	PRTN3
sp|P32320|CDD_HUMAN	P32320	146	16185	24	Cytidine deaminase OS=Homo sapiens OX=9606 GN=CDA PE=1 SV=2	Cytidine deaminase	CDA
sp|P36955|PEDF_HUMAN	P36955	418	46312	24	Pigment epithelium-derived factor OS=Homo sapiens OX=9606 GN=SERPINF1 PE=1 SV=4	Pigment epithelium-derived factor	SERPINF1
sp|Q05639|EF1A2_HUMAN	Q05639	463	50470	24	Elongation factor 1-alpha 2 OS=Homo sapiens OX=9606 GN=EEF1A2 PE=1 SV=1	Elongation factor 1-alpha 2	EEF1A2
sp|Q86UD1|OAF_HUMAN	Q86UD1	273	30688	24	Out at first protein homolog OS=Homo sapiens OX=9606 GN=OAF PE=2 SV=1	Out at first protein homolog	OAF
sp|Q8TAX7|MUC7_HUMAN	Q8TAX7	377	39159	24	Mucin-7 OS=Homo sapiens OX=9606 GN=MUC7 PE=1 SV=2	Mucin-7	MUC7
sp|Q9UBR2|CATZ_HUMAN	Q9UBR2	303	33868	24	Cathepsin Z OS=Homo sapiens OX=9606 GN=CTSZ PE=1 SV=1	Cathepsin Z	CTSZ
sp|P04211|LV743_HUMAN	P04211	117	12451	23	Immunoglobulin lambda variable 7-43 OS=Homo sapiens OX=9606 GN=IGLV7-43 PE=3 SV=2	Immunoglobulin lambda variable 7-43	IGLV7-43
sp|P07900|HS90A_HUMAN	P07900	732	84660	23	Heat shock protein HSP 90-alpha OS=Homo sapiens OX=9606 GN=HSP90AA1 PE=1 SV=5	Heat shock protein HSP 90-alpha	HSP90AA1
sp|P21675|TAF1_HUMAN;sp|Q8IZX4|TAF1L_HUMAN	P21675;Q8IZX4	1893	214712	23	Transcription initiation factor TFIID subunit 1 OS=Homo sapiens OX=9606 GN=TAF1 PE=1 SV=3	Transcription initiation factor TFIID subunit 1	TAF1
sp|P62987|RL40_HUMAN	P62987	128	14728	23	Ubiquitin-ribosomal protein eL40 fusion protein OS=Homo sapiens OX=9606 GN=UBA52 PE=1 SV=2	Ubiquitin-ribosomal protein eL40 fusion protein	UBA52
sp|A0A0C4DH42|HV366_HUMAN;sp|P01767|HV353_HUMAN	A0A0C4DH42;P01767	116	12698	22	Immunoglobulin heavy variable 3-66 OS=Homo sapiens OX=9606 GN=IGHV3-66 PE=3 SV=1	Immunoglobulin heavy variable 3-66	IGHV3-66
sp|O75083|WDR1_HUMAN	O75083	606	66194	22	WD repeat-containing protein 1 OS=Homo sapiens OX=9606 GN=WDR1 PE=1 SV=4	WD repeat-containing protein 1	WDR1
sp|O75841|UPK1B_HUMAN	O75841	260	29643	22	Uroplakin-1b OS=Homo sapiens OX=9606 GN=UPK1B PE=1 SV=5	Uroplakin-1b	UPK1B
sp|P00747|PLMN_HUMAN	P00747	810	90569	22	Plasminogen OS=Homo sapiens OX=9606 GN=PLG PE=1 SV=2	Plasminogen	PLG
sp|P04066|FUCO_HUMAN	P04066	466	53689	22	Tissue alpha-L-fucosidase OS=Homo sapiens OX=9606 GN=FUCA1 PE=1 SV=4	Tissue alpha-L-fucosidase	FUCA1
sp|Q6ZVX7|FBX50_HUMAN	Q6ZVX7	275	30847	22	F-box only protein 50 OS=Homo sapiens OX=9606 GN=NCCRP1 PE=1 SV=1	F-box only protein 50	NCCRP1
sp|O95171|SCEL_HUMAN	O95171	688	77552	21	Sciellin OS=Homo sapiens OX=9606 GN=SCEL PE=1 SV=2	Sciellin	SCEL
sp|P01718|LV327_HUMAN	P01718	113	12165	21	Immunoglobulin lambda variable 3-27 OS=Homo sapiens OX=9606 GN=IGLV3-27 PE=1 SV=2	Immunoglobulin lambda variable 3-27	IGLV3-27
sp|P05787|K2C8_HUMAN;sp|P08729|K2C7_HUMAN	P05787;P08729	483	53704	21	Keratin, type II cytoskeletal 8 OS=Homo sapiens OX=9606 GN=KRT8 PE=1 SV=7	Keratin, type II cytoskeletal 8	KRT8
sp|P09758|TACD2_HUMAN	P09758	323	35709	21	Tumor-associated calcium signal transducer 2 OS=Homo sapiens OX=9606 GN=TACSTD2 PE=1 SV=3	Tumor-associated calcium signal transducer 2	TACSTD2
sp|P50897|PPT1_HUMAN	P50897	306	34193	21	Palmitoyl-protein thioesterase 1 OS=Homo sapiens OX=9606 GN=PPT1 PE=1 SV=1	Palmitoyl-protein thioesterase 1	PPT1
sp|Q9BUF5|TBB6_HUMAN	Q9BUF5	446	49857	21	Tubulin beta-6 chain OS=Homo sapiens OX=9606 GN=TUBB6 PE=1 SV=1	Tubulin beta-6 chain	TUBB6
sp|A5A3E0|POTEF_HUMAN	A5A3E0	1075	121444	20	POTE ankyrin domain family member F OS=Homo sapiens OX=9606 GN=POTEF PE=1 SV=2	POTE ankyrin domain family member F	POTEF
sp|O75223|GGCT_HUMAN	O75223	188	21008	20	Gamma-glutamylcyclotransferase OS=Homo sapiens OX=9606 GN=GGCT PE=1 SV=1	Gamma-glutamylcyclotransferase	GGCT
sp|P06576|ATPB_HUMAN	P06576	529	56560	20	ATP synthase subunit beta, mitochondrial OS=Homo sapiens OX=9606 GN=ATP5F1B PE=1 SV=3	ATP synthase subunit beta, mitochondrial	ATP5F1B
sp|P0C0L4|CO4A_HUMAN	P0C0L4	1744	192784	20	Complement C4-A OS=Homo sapiens OX=9606 GN=C4A PE=1 SV=2	Complement C4-A	C4A
sp|P20160|CAP7_HUMAN	P20160	251	26886	20	Azurocidin OS=Homo sapiens OX=9606 GN=AZU1 PE=1 SV=3	Azurocidin	AZU1
sp|P80511|S10AC_HUMAN	P80511	92	10575	20	Protein S100-A12 OS=Homo sapiens OX=9606 GN=S100A12 PE=1 SV=2	Protein S100-A12	S100A12
sp|Q6PRD1|GP179_HUMAN	Q6PRD1	2367	257360	20	Probable G-protein coupled receptor 179 OS=Homo sapiens OX=9606 GN=GPR179 PE=1 SV=2	Probable G-protein coupled receptor 179	GPR179
sp|Q9H3U1|UN45A_HUMAN	Q9H3U1	944	103077	20	Protein unc-45 homolog A OS=Homo sapiens OX=9606 GN=UNC45A PE=1 SV=1	Protein unc-45 homolog A	UNC45A
sp|Q9NSB2|KRT84_HUMAN	Q9NSB2	600	64842	20	Keratin, type II cuticular Hb4 OS=Homo sapiens OX=9606 GN=KRT84 PE=2 SV=2	Keratin, type II cuticular Hb4	KRT84
sp|P22531|SPR2E_HUMAN;sp|Q9BYE4|SPR2G_HUMAN;sp|P35326|SPR2A_HUMAN;sp|P35325|SPR2B_HUMAN;sp|P22532|SPR2D_HUMAN	P22531;Q9BYE4;P35326;P35325;P22532	72	7855	19	Small proline-rich protein 2E OS=Homo sapiens OX=9606 GN=SPRR2E PE=2 SV=2	Small proline-rich protein 2E	SPRR2E
sp|P48741|HSP77_HUMAN	P48741	367	40244	19	Putative heat shock 70 kDa protein 7 OS=Homo sapiens OX=9606 GN=HSPA7 PE=5 SV=2	Putative heat shock 70 kDa protein 7	HSPA7
sp|P50238|CRIP1_HUMAN	P50238	77	8533	19	Cysteine-rich protein 1 OS=Homo sapiens OX=9606 GN=CRIP1 PE=1 SV=3	Cysteine-rich protein 1	CRIP1
sp|P68104|EF1A1_HUMAN;sp|Q5VTE0|EF1A3_HUMAN;sp|Q05639|EF1A2_HUMAN	P68104;Q5VTE0;Q05639	462	50141	19	Elongation factor 1-alpha 1 OS=Homo sapiens OX=9606 GN=EEF1A1 PE=1 SV=1	Elongation factor 1-alpha 1	EEF1A1
sp|Q00610|CLH1_HUMAN	Q00610	1675	191613	19	Clathrin heavy chain 1 OS=Homo sapiens OX=9606 GN=CLTC PE=1 SV=5	Clathrin heavy chain 1	CLTC
sp|Q03591|FHR1_HUMAN	Q03591	330	37651	19	Complement factor H-related protein 1 OS=Homo sapiens OX=9606 GN=CFHR1 PE=1 SV=2	Complement factor H-related protein 1	CFHR1
sp|Q15847|ADIRF_HUMAN	Q15847	76	7855	19	Adipogenesis regulatory factor OS=Homo sapiens OX=9606 GN=ADIRF PE=1 SV=1	Adipogenesis regulatory factor	ADIRF
sp|Q6PCB0|VWA1_HUMAN	Q6PCB0	445	46804	19	von Willebrand factor A domain-containing protein 1 OS=Homo sapiens OX=9606 GN=VWA1 PE=1 SV=1	von Willebrand factor A domain-containing protein 1	VWA1
sp|Q9Y646|CBPQ_HUMAN	Q9Y646	472	51888	19	Carboxypeptidase Q OS=Homo sapiens OX=9606 GN=CPQ PE=1 SV=1	Carboxypeptidase Q	CPQ
sp|A0A0J9YVY3|HV741_HUMAN	A0A0J9YVY3	117	12849	18	Immunoglobulin heavy variable 7-4-1 OS=Homo sapiens OX=9606 GN=IGHV7-4-1 PE=3 SV=1	Immunoglobulin heavy variable 7-4-1	IGHV7-4-1
sp|O00151|PDLI1_HUMAN	O00151	329	36072	18	PDZ and LIM domain protein 1 OS=Homo sapiens OX=9606 GN=PDLIM1 PE=1 SV=4	PDZ and LIM domain protein 1	PDLIM1
sp|P04196|HRG_HUMAN	P04196	525	59578	18	Histidine-rich glycoprotein OS=Homo sapiens OX=9606 GN=HRG PE=1 SV=1	Histidine-rich glycoprotein	HRG
sp|P07384|CAN1_HUMAN	P07384	714	81890	18	Calpain-1 catalytic subunit OS=Homo sapiens OX=9606 GN=CAPN1 PE=1 SV=1	Calpain-1 catalytic subunit	CAPN1
sp|P07738|PMGE_HUMAN	P07738	259	30005	18	Bisphosphoglycerate mutase OS=Homo sapiens OX=9606 GN=BPGM PE=1 SV=2	Bisphosphoglycerate mutase	BPGM
sp|P27105|STOM_HUMAN	P27105	288	31731	18	Stomatin OS=Homo sapiens OX=9606 GN=STOM PE=1 SV=3	Stomatin	STOM
sp|P30086|PEBP1_HUMAN	P30086	187	21057	18	Phosphatidylethanolamine-binding protein 1 OS=Homo sapiens OX=9606 GN=PEBP1 PE=1 SV=3	Phosphatidylethanolamine-binding protein 1	PEBP1
sp|P35749|MYH11_HUMAN	P35749	1972	227337	18	Myosin-11 OS=Homo sapiens OX=9606 GN=MYH11 PE=1 SV=3	Myosin-11	MYH11
sp|P50591|TNF10_HUMAN	P50591	281	32509	18	Tumor necrosis factor ligand superfamily member 10 OS=Homo sapiens OX=9606 GN=TNFSF10 PE=1 SV=1	Tumor necrosis factor ligand superfamily member 10	TNFSF10
sp|P80748|LV321_HUMAN	P80748	117	12446	18	Immunoglobulin lambda variable 3-21 OS=Homo sapiens OX=9606 GN=IGLV3-21 PE=1 SV=2	Immunoglobulin lambda variable 3-21	IGLV3-21
sp|Q9H1E1|RNAS7_HUMAN	Q9H1E1	156	17419	18	Ribonuclease 7 OS=Homo sapiens OX=9606 GN=RNASE7 PE=1 SV=2	Ribonuclease 7	RNASE7
sp|A6NMY6|AXA2L_HUMAN;sp|P07355|ANXA2_HUMAN	A6NMY6;P07355	339	38659	17	Putative annexin A2-like protein OS=Homo sapiens OX=9606 GN=ANXA2P2 PE=5 SV=2	Putative annexin A2-like protein	ANXA2P2
sp|P15814|IGLL1_HUMAN	P15814	213	22963	17	Immunoglobulin lambda-like polypeptide 1 OS=Homo sapiens OX=9606 GN=IGLL1 PE=1 SV=1	Immunoglobulin lambda-like polypeptide 1	IGLL1
sp|P49862|KLK7_HUMAN	P49862	253	27525	17	Kallikrein-7 OS=Homo sapiens OX=9606 GN=KLK7 PE=1 SV=1	Kallikrein-7	KLK7
sp|P52907|CAZA1_HUMAN	P52907	286	32923	17	F-actin-capping protein subunit alpha-1 OS=Homo sapiens OX=9606 GN=CAPZA1 PE=1 SV=3	F-actin-capping protein subunit alpha-1	CAPZA1
sp|Q9UBT3|DKK4_HUMAN	Q9UBT3	224	24876	17	Dickkopf-related protein 4 OS=Homo sapiens OX=9606 GN=DKK4 PE=1 SV=1	Dickkopf-related protein 4	DKK4
sp|O43505|B4GA1_HUMAN	O43505	415	47119	16	Beta-1,4-glucuronyltransferase 1 OS=Homo sapiens OX=9606 GN=B4GAT1 PE=1 SV=1	Beta-1,4-glucuronyltransferase 1	B4GAT1
sp|O75688|PPM1B_HUMAN	O75688	479	52643	16	Protein phosphatase 1B OS=Homo sapiens OX=9606 GN=PPM1B PE=1 SV=1	Protein phosphatase 1B	PPM1B
sp|O75787|RENR_HUMAN	O75787	350	39008	16	Renin receptor OS=Homo sapiens OX=9606 GN=ATP6AP2 PE=1 SV=2	Renin receptor	ATP6AP2
sp|P08118|MSMB_HUMAN	P08118	114	12865	16	Beta-microseminoprotein OS=Homo sapiens OX=9606 GN=MSMB PE=1 SV=1	Beta-microseminoprotein	MSMB
sp|P13797|PLST_HUMAN	P13797	630	70811	16	Plastin-3 OS=Homo sapiens OX=9606 GN=PLS3 PE=1 SV=4	Plastin-3	PLS3
sp|P23528|COF1_HUMAN;sp|Q9Y281|COF2_HUMAN	P23528;Q9Y281	166	18502	16	Cofilin-1 OS=Homo sapiens OX=9606 GN=CFL1 PE=1 SV=3	Cofilin-1	CFL1
sp|P30041|PRDX6_HUMAN	P30041	224	25035	16	Peroxiredoxin-6 OS=Homo sapiens OX=9606 GN=PRDX6 PE=1 SV=3	Peroxiredoxin-6	PRDX6
sp|Q16610|ECM1_HUMAN	Q16610	540	60674	16	Extracellular matrix protein 1 OS=Homo sapiens OX=9606 GN=ECM1 PE=1 SV=2	Extracellular matrix protein 1	ECM1
sp|Q96PD5|PGRP2_HUMAN	Q96PD5	576	62217	16	N-acetylmuramoyl-L-alanine amidase OS=Homo sapiens OX=9606 GN=PGLYRP2 PE=1 SV=1	N-acetylmuramoyl-L-alanine amidase	PGLYRP2
sp|A0A075B6R2|HV404_HUMAN;sp|P0DP08|HVD82_HUMAN;sp|P0DP07|HV431_HUMAN;sp|P0DP06|HVD34_HUMAN;sp|P06331|HV434_HUMAN;sp|P01825|HV459_HUMAN;sp|P01824|HV439_HUMAN;sp|A0A0C4DH41|HV461_HUMAN;sp|A0A087WSY4|HV432_HUMAN	A0A075B6R2;P0DP08;P0DP07;P0DP06;P06331;P01825;P01824;A0A0C4DH41;A0A087WSY4	117	12848	15	Immunoglobulin heavy variable 4-4 OS=Homo sapiens OX=9606 GN=IGHV4-4 PE=3 SV=2	Immunoglobulin heavy variable 4-4	IGHV4-4
sp|O00560|SDCB1_HUMAN	O00560	298	32444	15	Syntenin-1 OS=Homo sapiens OX=9606 GN=SDCBP PE=1 SV=1	Syntenin-1	SDCBP
sp|O15041|SEM3E_HUMAN	O15041	775	89228	15	Semaphorin-3E OS=Homo sapiens OX=9606 GN=SEMA3E PE=1 SV=1	Semaphorin-3E	SEMA3E
sp|P04350|TBB4A_HUMAN;sp|Q9BVA1|TBB2B_HUMAN;sp|Q9BUF5|TBB6_HUMAN;sp|Q13885|TBB2A_HUMAN;sp|P68371|TBB4B_HUMAN;sp|P07437|TBB5_HUMAN	P04350;Q9BVA1;Q9BUF5;Q13885;P68371;P07437	444	49586	15	Tubulin beta-4A chain OS=Homo sapiens OX=9606 GN=TUBB4A PE=1 SV=2	Tubulin beta-4A chain	TUBB4A
sp|P04908|H2A1B_HUMAN;sp|Q9BTM1|H2AJ_HUMAN;sp|Q99878|H2A1J_HUMAN;sp|Q96QV6|H2A1A_HUMAN;sp|Q96KK5|H2A1H_HUMAN;sp|Q93077|H2A1C_HUMAN;sp|Q8IUE6|H2A2B_HUMAN;sp|Q7L7L0|H2A3_HUMAN;sp|Q71UI9|H2AV_HUMAN;sp|Q6FI13|H2A2A_HUMAN;sp|Q16777|H2A2C_HUMAN;sp|P20671|H2A1D_HUMAN;sp|P16104|H2AX_HUMAN;sp|P0C0S8|H2A1_HUMAN;sp|P0C0S5|H2AZ_HUMAN	P04908;Q9BTM1;Q99878;Q96QV6;Q96KK5;Q93077;Q8IUE6;Q7L7L0;Q71UI9;Q6FI13;Q16777;P20671;P16104;P0C0S8;P0C0S5	130	14135	15	Histone H2A type 1-B/E OS=Homo sapiens OX=9606 GN=H2AC4 PE=1 SV=2	Histone H2A type 1-B/E	H2AC4
sp|P13284|GILT_HUMAN	P13284	250	27964	15	Gamma-interferon-inducible lysosomal thiol reductase OS=Homo sapiens OX=9606 GN=IFI30 PE=1 SV=3	Gamma-interferon-inducible lysosomal thiol reductase	IFI30
sp|P50748|KNTC1_HUMAN	P50748	2209	250746	15	Kinetochore-associated protein 1 OS=Homo sapiens OX=9606 GN=KNTC1 PE=1 SV=1	Kinetochore-associated protein 1	KNTC1
sp|P52565|GDIR1_HUMAN	P52565	204	23207	15	Rho GDP-dissociation inhibitor 1 OS=Homo sapiens OX=9606 GN=ARHGDIA PE=1 SV=3	Rho GDP-dissociation inhibitor 1	ARHGDIA
sp|Q8NFT8|DNER_HUMAN	Q8NFT8	737	78475	15	Delta and Notch-like epidermal growth factor-related receptor OS=Homo sapiens OX=9606 GN=DNER PE=1 SV=1	Delta and Notch-like epidermal growth factor-related receptor	DNER
sp|Q99519|NEUR1_HUMAN	Q99519	415	45467	15	Sialidase-1 OS=Homo sapiens OX=9606 GN=NEU1 PE=1 SV=1	Sialidase-1	NEU1
sp|Q9H2G2|SLK_HUMAN	Q9H2G2	1235	142695	15	STE20-like serine/threonine-protein kinase OS=Homo sapiens OX=9606 GN=SLK PE=1 SV=1	STE20-like serine/threonine-protein kinase	SLK
sp|Q9NZ08|ERAP1_HUMAN	Q9NZ08	941	107235	15	Endoplasmic reticulum aminopeptidase 1 OS=Homo sapiens OX=9606 GN=ERAP1 PE=1 SV=3	Endoplasmic reticulum aminopeptidase 1	ERAP1
sp|A0A087WSX0|LV545_HUMAN	A0A087WSX0	123	13162	14	Immunoglobulin lambda variable 5-45 OS=Homo sapiens OX=9606 GN=IGLV5-45 PE=3 SV=1	Immunoglobulin lambda variable 5-45	IGLV5-45
sp|P14174|MIF_HUMAN	P14174	115	12476	14	Macrophage migration inhibitory factor OS=Homo sapiens OX=9606 GN=MIF PE=1 SV=4	Macrophage migration inhibitory factor	MIF
sp|P22392|NDKB_HUMAN	P22392	152	17298	14	Nucleoside diphosphate kinase B OS=Homo sapiens OX=9606 GN=NME2 PE=1 SV=1	Nucleoside diphosphate kinase B	NME2
sp|P31751|AKT2_HUMAN	P31751	481	55769	14	RAC-beta serine/threonine-protein kinase OS=Homo sapiens OX=9606 GN=AKT2 PE=1 SV=2	RAC-beta serine/threonine-protein kinase	AKT2
sp|P60413|KR10C_HUMAN	P60413	245	25107	14	Keratin-associated protein 10-12 OS=Homo sapiens OX=9606 GN=KRTAP10-12 PE=2 SV=1	Keratin-associated protein 10-12	KRTAP10-12
sp|Q2M2I5|K1C24_HUMAN	Q2M2I5	525	55087	14	Keratin, type I cytoskeletal 24 OS=Homo sapiens OX=9606 GN=KRT24 PE=1 SV=1	Keratin, type I cytoskeletal 24	KRT24
sp|Q8TF30|WHAMM_HUMAN	Q8TF30	809	90924	14	WASP homolog-associated protein with actin, membranes and microtubules OS=Homo sapiens OX=9606 GN=WHAMM PE=1 SV=2	WASP homolog-associated protein with actin, membranes and microtubules	WHAMM
sp|Q9HBR0|S38AA_HUMAN	Q9HBR0	1119	119762	14	Solute carrier family 38 member 10 OS=Homo sapiens OX=9606 GN=SLC38A10 PE=1 SV=2	Solute carrier family 38 member 10	SLC38A10
sp|Q9Y2Q3|GSTK1_HUMAN	Q9Y2Q3	226	25497	14	Glutathione S-transferase kappa 1 OS=Homo sapiens OX=9606 GN=GSTK1 PE=1 SV=3	Glutathione S-transferase kappa 1	GSTK1
sp|A0A075B6H9|LV469_HUMAN	A0A075B6H9	119	12773	13	Immunoglobulin lambda variable 4-69 OS=Homo sapiens OX=9606 GN=IGLV4-69 PE=1 SV=1	Immunoglobulin lambda variable 4-69	IGLV4-69
sp|A0A075B6S6|KVD30_HUMAN	A0A075B6S6	120	13215	13	Immunoglobulin kappa variable 2D-30 OS=Homo sapiens OX=9606 GN=IGKV2D-30 PE=3 SV=1	Immunoglobulin kappa variable 2D-30	IGKV2D-30
sp|P25786|PSA1_HUMAN	P25786	263	29556	13	Proteasome subunit alpha type-1 OS=Homo sapiens OX=9606 GN=PSMA1 PE=1 SV=1	Proteasome subunit alpha type-1	PSMA1
sp|P47895|AL1A3_HUMAN	P47895	512	56109	13	Retinaldehyde dehydrogenase 3 OS=Homo sapiens OX=9606 GN=ALDH1A3 PE=1 SV=2	Retinaldehyde dehydrogenase 3	ALDH1A3
sp|P61006|RAB8A_HUMAN	P61006	207	23668	13	Ras-related protein Rab-8A OS=Homo sapiens OX=9606 GN=RAB8A PE=1 SV=1	Ras-related protein Rab-8A	RAB8A
sp|P68431|H31_HUMAN;sp|Q71DI3|H32_HUMAN;sp|P84243|H33_HUMAN	P68431;Q71DI3;P84243	136	15404	13	Histone H3.1 OS=Homo sapiens OX=9606 GN=H3C1 PE=1 SV=2	Histone H3.1	H3C1
sp|Q14574|DSC3_HUMAN	Q14574	896	99969	13	Desmocollin-3 OS=Homo sapiens OX=9606 GN=DSC3 PE=1 SV=3	Desmocollin-3	DSC3
sp|Q16270|IBP7_HUMAN	Q16270	282	29130	13	Insulin-like growth factor-binding protein 7 OS=Homo sapiens OX=9606 GN=IGFBP7 PE=1 SV=1	Insulin-like growth factor-binding protein 7	IGFBP7
sp|Q5HYC2|K2026_HUMAN	Q5HYC2	2103	228085	13	Uncharacterized protein KIAA2026 OS=Homo sapiens OX=9606 GN=KIAA2026 PE=2 SV=2	Uncharacterized protein KIAA2026	KIAA2026
sp|Q6NSI8|SANBR_HUMAN	Q6NSI8	718	82007	13	SANT and BTB domain regulator of class switch recombination OS=Homo sapiens OX=9606 GN=SANBR PE=2 SV=2	SANT and BTB domain regulator of class switch recombination	SANBR
sp|Q86T26|TM11B_HUMAN	Q86T26	416	46337	13	Transmembrane protease serine 11B OS=Homo sapiens OX=9606 GN=TMPRSS11B PE=2 SV=3	Transmembrane protease serine 11B	TMPRSS11B
sp|Q9UNW1|MINP1_HUMAN	Q9UNW1	487	55051	13	Multiple inositol polyphosphate phosphatase 1 OS=Homo sapiens OX=9606 GN=MINPP1 PE=1 SV=1	Multiple inositol polyphosphate phosphatase 1	MINPP1
sp|A0A075B6K5|LV39_HUMAN	A0A075B6K5	115	12332	12	Immunoglobulin lambda variable 3-9 OS=Homo sapiens OX=9606 GN=IGLV3-9 PE=3 SV=1	Immunoglobulin lambda variable 3-9	IGLV3-9
sp|A0A075B6Q5|HV364_HUMAN	A0A075B6Q5	118	12891	12	Immunoglobulin heavy variable 3-64 OS=Homo sapiens OX=9606 GN=IGHV3-64 PE=3 SV=1	Immunoglobulin heavy variable 3-64	IGHV3-64
sp|A2NJV5|KV229_HUMAN	A2NJV5	120	13085	12	Immunoglobulin kappa variable 2-29 OS=Homo sapiens OX=9606 GN=IGKV2-29 PE=3 SV=2	Immunoglobulin kappa variable 2-29	IGKV2-29
sp|P00736|C1R_HUMAN	P00736	705	80119	12	Complement C1r subcomponent OS=Homo sapiens OX=9606 GN=C1R PE=1 SV=2	Complement C1r subcomponent	C1R
sp|P02778|CXL10_HUMAN	P02778	98	10881	12	C-X-C motif chemokine 10 OS=Homo sapiens OX=9606 GN=CXCL10 PE=1 SV=2	C-X-C motif chemokine 10	CXCL10
sp|P19113|DCHS_HUMAN	P19113	662	74141	12	Histidine decarboxylase OS=Homo sapiens OX=9606 GN=HDC PE=1 SV=2	Histidine decarboxylase	HDC
sp|P47929|LEG7_HUMAN	P47929	136	15075	12	Galectin-7 OS=Homo sapiens OX=9606 GN=LGALS7 PE=1 SV=2	Galectin-7	LGALS7
sp|P50995|ANX11_HUMAN	P50995	505	54390	12	Annexin A11 OS=Homo sapiens OX=9606 GN=ANXA11 PE=1 SV=1	Annexin A11	ANXA11
sp|P58107|EPIPL_HUMAN	P58107	5088	555666	12	Epiplakin OS=Homo sapiens OX=9606 GN=EPPK1 PE=1 SV=3	Epiplakin	EPPK1
sp|P68363|TBA1B_HUMAN;sp|P68366|TBA4A_HUMAN	P68363;P68366	451	50152	12	Tubulin alpha-1B chain OS=Homo sapiens OX=9606 GN=TUBA1B PE=1 SV=1	Tubulin alpha-1B chain	TUBA1B
sp|Q14690|RRP5_HUMAN	Q14690	1871	208699	12	Protein RRP5 homolog OS=Homo sapiens OX=9606 GN=PDCD11 PE=1 SV=3	Protein RRP5 homolog	PDCD11
sp|Q15746|MYLK_HUMAN	Q15746	1914	210713	12	Myosin light chain kinase, smooth muscle OS=Homo sapiens OX=9606 GN=MYLK PE=1 SV=4	Myosin light chain kinase, smooth muscle	MYLK
sp|Q9P127|LUZP4_HUMAN	Q9P127	313	35937	12	Leucine zipper protein 4 OS=Homo sapiens OX=9606 GN=LUZP4 PE=1 SV=1	Leucine zipper protein 4	LUZP4
sp|A6NNZ2|TBB8B_HUMAN;sp|Q9BVA1|TBB2B_HUMAN;sp|Q9BUF5|TBB6_HUMAN;sp|Q3ZCM7|TBB8_HUMAN;sp|Q13885|TBB2A_HUMAN;sp|P68371|TBB4B_HUMAN;sp|P07437|TBB5_HUMAN;sp|P04350|TBB4A_HUMAN	A6NNZ2;Q9BVA1;Q9BUF5;Q3ZCM7;Q13885;P68371;P07437;P04350	444	49573	11	Tubulin beta 8B OS=Homo sapiens OX=9606 GN=TUBB8B PE=1 SV=1	Tubulin beta 8B	TUBB8B
sp|O95274|LYPD3_HUMAN	O95274	346	35971	11	Ly6/PLAUR domain-containing protein 3 OS=Homo sapiens OX=9606 GN=LYPD3 PE=1 SV=2	Ly6/PLAUR domain-containing protein 3	LYPD3
sp|P06280|AGAL_HUMAN	P06280	429	48767	11	Alpha-galactosidase A OS=Homo sapiens OX=9606 GN=GLA PE=1 SV=1	Alpha-galactosidase A	GLA
sp|P06727|APOA4_HUMAN	P06727	396	45372	11	Apolipoprotein A-IV OS=Homo sapiens OX=9606 GN=APOA4 PE=1 SV=4	Apolipoprotein A-IV	APOA4
sp|P09525|ANXA4_HUMAN	P09525	319	35883	11	Annexin A4 OS=Homo sapiens OX=9606 GN=ANXA4 PE=1 SV=4	Annexin A4	ANXA4
sp|P14649|MYL6B_HUMAN;sp|P60660|MYL6_HUMAN	P14649;P60660	208	22764	11	Myosin light chain 6B OS=Homo sapiens OX=9606 GN=MYL6B PE=1 SV=1	Myosin light chain 6B	MYL6B
sp|P15515|HIS1_HUMAN	P15515	57	6963	11	Histatin-1 OS=Homo sapiens OX=9606 GN=HTN1 PE=1 SV=2	Histatin-1	HTN1
sp|P15941|MUC1_HUMAN	P15941	1255	122102	11	Mucin-1 OS=Homo sapiens OX=9606 GN=MUC1 PE=1 SV=3	Mucin-1	MUC1
sp|P18621|RL17_HUMAN;sp|Q9Y4G6|TLN2_HUMAN	P18621;Q9Y4G6	184	21397	11	Large ribosomal subunit protein uL22 OS=Homo sapiens OX=9606 GN=RPL17 PE=1 SV=3	Large ribosomal subunit protein uL22	RPL17
sp|P19971|TYPH_HUMAN	P19971	482	49955	11	Thymidine phosphorylase OS=Homo sapiens OX=9606 GN=TYMP PE=1 SV=2	Thymidine phosphorylase	TYMP
sp|Q6PL18|ATAD2_HUMAN	Q6PL18	1390	158554	11	ATPase family AAA domain-containing protein 2 OS=Homo sapiens OX=9606 GN=ATAD2 PE=1 SV=1	ATPase family AAA domain-containing protein 2	ATAD2
sp|Q7Z7M9|GALT5_HUMAN	Q7Z7M9	940	106266	11	Polypeptide N-acetylgalactosaminyltransferase 5 OS=Homo sapiens OX=9606 GN=GALNT5 PE=1 SV=1	Polypeptide N-acetylgalactosaminyltransferase 5	GALNT5
sp|Q8N4A0|GALT4_HUMAN	Q8N4A0	578	66666	11	Polypeptide N-acetylgalactosaminyltransferase 4 OS=Homo sapiens OX=9606 GN=GALNT4 PE=1 SV=2	Polypeptide N-acetylgalactosaminyltransferase 4	GALNT4
sp|Q8N7U6|EFHB_HUMAN	Q8N7U6	833	93802	11	EF-hand domain-containing family member B OS=Homo sapiens OX=9606 GN=EFHB PE=1 SV=4	EF-hand domain-containing family member B	EFHB
sp|P06865|HEXA_HUMAN	P06865	529	60703	10	Beta-hexosaminidase subunit alpha OS=Homo sapiens OX=9606 GN=HEXA PE=1 SV=2	Beta-hexosaminidase subunit alpha	HEXA
sp|P12429|ANXA3_HUMAN	P12429	323	36375	10	Annexin A3 OS=Homo sapiens OX=9606 GN=ANXA3 PE=1 SV=3	Annexin A3	ANXA3
sp|P15311|EZRI_HUMAN;sp|P35241|RADI_HUMAN;sp|P26038|MOES_HUMAN	P15311;P35241;P26038	586	69413	10	Ezrin OS=Homo sapiens OX=9606 GN=EZR PE=1 SV=4	Ezrin	EZR
sp|P19823|ITIH2_HUMAN	P19823	946	106463	10	Inter-alpha-trypsin inhibitor heavy chain H2 OS=Homo sapiens OX=9606 GN=ITIH2 PE=1 SV=2	Inter-alpha-trypsin inhibitor heavy chain H2	ITIH2
sp|P35241|RADI_HUMAN	P35241	583	68564	10	Radixin OS=Homo sapiens OX=9606 GN=RDX PE=1 SV=1	Radixin	RDX
sp|P37802|TAGL2_HUMAN	P37802	199	22391	10	Transgelin-2 OS=Homo sapiens OX=9606 GN=TAGLN2 PE=1 SV=3	Transgelin-2	TAGLN2
sp|Q14050|CO9A3_HUMAN	Q14050	684	63616	10	Collagen alpha-3(IX) chain OS=Homo sapiens OX=9606 GN=COL9A3 PE=1 SV=2	Collagen alpha-3(IX) chain	COL9A3
sp|Q7Z3Y8|K1C27_HUMAN;sp|Q7Z3Z0|K1C25_HUMAN	Q7Z3Y8;Q7Z3Z0	459	49822	10	Keratin, type I cytoskeletal 27 OS=Homo sapiens OX=9606 GN=KRT27 PE=1 SV=2	Keratin, type I cytoskeletal 27	KRT27
sp|Q96GS6|AB17A_HUMAN	Q96GS6	310	33990	10	Alpha/beta hydrolase domain-containing protein 17A OS=Homo sapiens OX=9606 GN=ABHD17A PE=1 SV=1	Alpha/beta hydrolase domain-containing protein 17A	ABHD17A
sp|Q9BYD5|CNFN_HUMAN	Q9BYD5	112	12376	10	Cornifelin OS=Homo sapiens OX=9606 GN=CNFN PE=1 SV=2	Cornifelin	CNFN
sp|Q9UBX1|CATF_HUMAN	Q9UBX1	484	53366	10	Cathepsin F OS=Homo sapiens OX=9606 GN=CTSF PE=1 SV=1	Cathepsin F	CTSF
sp|A6NM28|ZFP92_HUMAN	A6NM28	416	45791	9	Zinc finger protein 92 homolog OS=Homo sapiens OX=9606 GN=ZFP92 PE=2 SV=3	Zinc finger protein 92 homolog	ZFP92
sp|O00592|PODXL_HUMAN	O00592	558	58635	9	Podocalyxin OS=Homo sapiens OX=9606 GN=PODXL PE=1 SV=2	Podocalyxin	PODXL
sp|P0DPH7|TBA3C_HUMAN;sp|P0DPH8|TBA3D_HUMAN	P0DPH7;P0DPH8	450	49960	9	Tubulin alpha-3C chain OS=Homo sapiens OX=9606 GN=TUBA3C PE=1 SV=1	Tubulin alpha-3C chain	TUBA3C
sp|P23526|SAHH_HUMAN	P23526	432	47716	9	Adenosylhomocysteinase OS=Homo sapiens OX=9606 GN=AHCY PE=1 SV=4	Adenosylhomocysteinase	AHCY
sp|P36894|BMR1A_HUMAN	P36894	532	60198	9	Bone morphogenetic protein receptor type-1A OS=Homo sapiens OX=9606 GN=BMPR1A PE=1 SV=2	Bone morphogenetic protein receptor type-1A	BMPR1A
sp|P57721|PCBP3_HUMAN;sp|Q15366|PCBP2_HUMAN;sp|Q15365|PCBP1_HUMAN	P57721;Q15366;Q15365	371	39465	9	Poly(rC)-binding protein 3 OS=Homo sapiens OX=9606 GN=PCBP3 PE=1 SV=2	Poly(rC)-binding protein 3	PCBP3
sp|P60903|S10AA_HUMAN	P60903	97	11203	9	Protein S100-A10 OS=Homo sapiens OX=9606 GN=S100A10 PE=1 SV=2	Protein S100-A10	S100A10
sp|Q07654|TFF3_HUMAN	Q07654	80	8641	9	Trefoil factor 3 OS=Homo sapiens OX=9606 GN=TFF3 PE=1 SV=3	Trefoil factor 3	TFF3
sp|Q71U36|TBA1A_HUMAN;sp|Q9BQE3|TBA1C_HUMAN	Q71U36;Q9BQE3	451	50136	9	Tubulin alpha-1A chain OS=Homo sapiens OX=9606 GN=TUBA1A PE=1 SV=1	Tubulin alpha-1A chain	TUBA1A
sp|Q86VR7|VS10L_HUMAN	Q86VR7	867	91625	9	V-set and immunoglobulin domain-containing protein 10-like OS=Homo sapiens OX=9606 GN=VSIG10L PE=2 SV=2	V-set and immunoglobulin domain-containing protein 10-like	VSIG10L
sp|A0A075B6H7|KV37_HUMAN	A0A075B6H7	116	12783	8	Probable non-functional immunoglobulin kappa variable 3-7 OS=Homo sapiens OX=9606 GN=IGKV3-7 PE=1 SV=1	Probable non-functional immunoglobulin kappa variable 3-7	IGKV3-7
sp|A0A0A0MT89|KJ01_HUMAN	A0A0A0MT89	12	1394	8	Immunoglobulin kappa joining 1 OS=Homo sapiens OX=9606 GN=IGKJ1 PE=4 SV=2	Immunoglobulin kappa joining 1	IGKJ1
sp|B2RPK0|HGB1A_HUMAN;sp|P09429|HMGB1_HUMAN	B2RPK0;P09429	211	24238	8	Putative high mobility group protein B1-like 1 OS=Homo sapiens OX=9606 GN=HMGB1P1 PE=5 SV=1	Putative high mobility group protein B1-like 1	HMGB1P1
sp|O00115|DNS2A_HUMAN	O00115	360	39581	8	Deoxyribonuclease-2-alpha OS=Homo sapiens OX=9606 GN=DNASE2 PE=1 SV=2	Deoxyribonuclease-2-alpha	DNASE2
sp|O43790|KRT86_HUMAN;sp|Q14533|KRT81_HUMAN;sp|P78386|KRT85_HUMAN;sp|P78385|KRT83_HUMAN	O43790;Q14533;P78386;P78385	486	53501	8	Keratin, type II cuticular Hb6 OS=Homo sapiens OX=9606 GN=KRT86 PE=1 SV=1	Keratin, type II cuticular Hb6	KRT86
sp|O60814|H2B1K_HUMAN;sp|Q99880|H2B1L_HUMAN;sp|Q99879|H2B1M_HUMAN;sp|Q99877|H2B1N_HUMAN;sp|Q93079|H2B1H_HUMAN;sp|Q5QNW6|H2B2F_HUMAN;sp|Q16778|H2B2E_HUMAN;sp|P62807|H2B1C_HUMAN;sp|P58876|H2B1D_HUMAN;sp|P57053|H2BFS_HUMAN;sp|P33778|H2B1B_HUMAN;sp|P23527|H2B1O_HUMAN;sp|P06899|H2B1J_HUMAN	O60814;Q99880;Q99879;Q99877;Q93079;Q5QNW6;Q16778;P62807;P58876;P57053;P33778;P23527;P06899	126	13890	8	Histone H2B type 1-K OS=Homo sapiens OX=9606 GN=H2BC12 PE=1 SV=3	Histone H2B type 1-K	H2BC12
sp|O75882|ATRN_HUMAN	O75882	1429	158536	8	Attractin OS=Homo sapiens OX=9606 GN=ATRN PE=1 SV=2	Attractin	ATRN
sp|O95263|PDE8B_HUMAN	O95263	885	98979	8	High affinity cAMP-specific and IBMX-insensitive 3',5'-cyclic phosphodiesterase 8B OS=Homo sapiens OX=9606 GN=PDE8B PE=1 SV=2	High affinity cAMP-specific and IBMX-insensitive 3',5'-cyclic phosphodiesterase 8B	PDE8B
sp|O95994|AGR2_HUMAN;sp|Q8TD06|AGR3_HUMAN	O95994;Q8TD06	175	19979	8	Anterior gradient protein 2 homolog OS=Homo sapiens OX=9606 GN=AGR2 PE=1 SV=1	Anterior gradient protein 2 homolog	AGR2
sp|P04217|A1BG_HUMAN	P04217	495	54254	8	Alpha-1B-glycoprotein OS=Homo sapiens OX=9606 GN=A1BG PE=1 SV=4	Alpha-1B-glycoprotein	A1BG
sp|P07951|TPM2_HUMAN	P07951	284	32851	8	Tropomyosin beta chain OS=Homo sapiens OX=9606 GN=TPM2 PE=1 SV=1	Tropomyosin beta chain	TPM2
sp|P0DPH7|TBA3C_HUMAN;sp|Q9NY65|TBA8_HUMAN;sp|P0DPH8|TBA3D_HUMAN	P0DPH7;Q9NY65;P0DPH8	450	49960	8	Tubulin alpha-3C chain OS=Homo sapiens OX=9606 GN=TUBA3C PE=1 SV=1	Tubulin alpha-3C chain	TUBA3C
sp|P40121|CAPG_HUMAN	P40121	348	38499	8	Macrophage-capping protein OS=Homo sapiens OX=9606 GN=CAPG PE=1 SV=2	Macrophage-capping protein	CAPG
sp|P52566|GDIR2_HUMAN	P52566	201	22988	8	Rho GDP-dissociation inhibitor 2 OS=Homo sapiens OX=9606 GN=ARHGDIB PE=1 SV=3	Rho GDP-dissociation inhibitor 2	ARHGDIB
sp|P58546|MTPN_HUMAN	P58546	118	12895	8	Myotrophin OS=Homo sapiens OX=9606 GN=MTPN PE=1 SV=2	Myotrophin	MTPN
sp|Q5T013|HYI_HUMAN	Q5T013	277	30406	8	Putative hydroxypyruvate isomerase OS=Homo sapiens OX=9606 GN=HYI PE=1 SV=2	Putative hydroxypyruvate isomerase	HYI
sp|Q5T2L2|AKCL1_HUMAN	Q5T2L2	129	14588	8	Putative aldo-keto reductase family 1 member C8 OS=Homo sapiens OX=9606 GN=AKR1C8 PE=5 SV=2	Putative aldo-keto reductase family 1 member C8	AKR1C8
sp|Q6P531|GGT6_HUMAN	Q6P531	493	50509	8	Glutathione hydrolase 6 OS=Homo sapiens OX=9606 GN=GGT6 PE=1 SV=2	Glutathione hydrolase 6	GGT6
sp|Q6UXI9|NPNT_HUMAN	Q6UXI9	565	61907	8	Nephronectin OS=Homo sapiens OX=9606 GN=NPNT PE=2 SV=3	Nephronectin	NPNT
sp|Q92820|GGH_HUMAN	Q92820	318	35964	8	Gamma-glutamyl hydrolase OS=Homo sapiens OX=9606 GN=GGH PE=1 SV=2	Gamma-glutamyl hydrolase	GGH
sp|Q9BS26|ERP44_HUMAN	Q9BS26	406	46971	8	Endoplasmic reticulum resident protein 44 OS=Homo sapiens OX=9606 GN=ERP44 PE=1 SV=1	Endoplasmic reticulum resident protein 44	ERP44
sp|Q9UHD0|IL19_HUMAN	Q9UHD0	177	20452	8	Interleukin-19 OS=Homo sapiens OX=9606 GN=IL19 PE=1 SV=2	Interleukin-19	IL19
sp|A0A075B6I9|LV746_HUMAN;sp|P04211|LV743_HUMAN	A0A075B6I9;P04211	117	12468	7	Immunoglobulin lambda variable 7-46 OS=Homo sapiens OX=9606 GN=IGLV7-46 PE=3 SV=4	Immunoglobulin lambda variable 7-46	IGLV7-46
sp|O43707|ACTN4_HUMAN;sp|P12814|ACTN1_HUMAN	O43707;P12814	911	104854	7	Alpha-actinin-4 OS=Homo sapiens OX=9606 GN=ACTN4 PE=1 SV=2	Alpha-actinin-4	ACTN4
sp|P02808|STAT_HUMAN	P02808	62	7304	7	Statherin OS=Homo sapiens OX=9606 GN=STATH PE=1 SV=2	Statherin	STATH
sp|P06731|CEAM5_HUMAN	P06731	702	76796	7	Carcinoembryonic antigen-related cell adhesion molecule 5 OS=Homo sapiens OX=9606 GN=CEACAM5 PE=1 SV=4	Carcinoembryonic antigen-related cell adhesion molecule 5	CEACAM5
sp|P08949|NMB_HUMAN	P08949	121	13252	7	Neuromedin-B OS=Homo sapiens OX=9606 GN=NMB PE=1 SV=4	Neuromedin-B	NMB
sp|P11279|LAMP1_HUMAN	P11279	417	44882	7	Lysosome-associated membrane glycoprotein 1 OS=Homo sapiens OX=9606 GN=LAMP1 PE=1 SV=3	Lysosome-associated membrane glycoprotein 1	LAMP1
sp|P13489|RINI_HUMAN	P13489	461	49974	7	Ribonuclease inhibitor OS=Homo sapiens OX=9606 GN=RNH1 PE=1 SV=2	Ribonuclease inhibitor	RNH1
sp|P15153|RAC2_HUMAN	P15153	192	21429	7	Ras-related C3 botulinum toxin substrate 2 OS=Homo sapiens OX=9606 GN=RAC2 PE=1 SV=1	Ras-related C3 botulinum toxin substrate 2	RAC2
sp|P17066|HSP76_HUMAN	P17066	643	71028	7	Heat shock 70 kDa protein 6 OS=Homo sapiens OX=9606 GN=HSPA6 PE=1 SV=2	Heat shock 70 kDa protein 6	HSPA6
sp|P28066|PSA5_HUMAN	P28066	241	26411	7	Proteasome subunit alpha type-5 OS=Homo sapiens OX=9606 GN=PSMA5 PE=1 SV=3	Proteasome subunit alpha type-5	PSMA5
sp|P42357|HUTH_HUMAN	P42357	657	72698	7	Histidine ammonia-lyase OS=Homo sapiens OX=9606 GN=HAL PE=1 SV=1	Histidine ammonia-lyase	HAL
sp|P49257|LMAN1_HUMAN	P49257	510	57549	7	Protein ERGIC-53 OS=Homo sapiens OX=9606 GN=LMAN1 PE=1 SV=2	Protein ERGIC-53	LMAN1
sp|P60981|DEST_HUMAN	P60981	165	18506	7	Destrin OS=Homo sapiens OX=9606 GN=DSTN PE=1 SV=3	Destrin	DSTN
sp|Q10471|GALT2_HUMAN	Q10471	571	64733	7	Polypeptide N-acetylgalactosaminyltransferase 2 OS=Homo sapiens OX=9606 GN=GALNT2 PE=1 SV=1	Polypeptide N-acetylgalactosaminyltransferase 2	GALNT2
sp|Q12841|FSTL1_HUMAN	Q12841	308	34985	7	Follistatin-related protein 1 OS=Homo sapiens OX=9606 GN=FSTL1 PE=1 SV=1	Follistatin-related protein 1	FSTL1
sp|Q15904|VAS1_HUMAN	Q15904	470	52026	7	V-type proton ATPase subunit S1 OS=Homo sapiens OX=9606 GN=ATP6AP1 PE=1 SV=2	V-type proton ATPase subunit S1	ATP6AP1
sp|Q687X5|STEA4_HUMAN	Q687X5	459	51981	7	Metalloreductase STEAP4 OS=Homo sapiens OX=9606 GN=STEAP4 PE=1 SV=1	Metalloreductase STEAP4	STEAP4
sp|Q96MK3|FA20A_HUMAN	Q96MK3	541	61417	7	Pseudokinase FAM20A OS=Homo sapiens OX=9606 GN=FAM20A PE=1 SV=4	Pseudokinase FAM20A	FAM20A
sp|A6NIZ1|RP1BL_HUMAN;sp|P62834|RAP1A_HUMAN;sp|P61224|RAP1B_HUMAN	A6NIZ1;P62834;P61224	184	20925	6	Ras-related protein Rap-1b-like protein OS=Homo sapiens OX=9606 GN=RAP1BL PE=2 SV=1	Ras-related protein Rap-1b-like protein	RAP1BL
sp|A8K2U0|A2ML1_HUMAN	A8K2U0	1454	161106	6	Alpha-2-macroglobulin-like protein 1 OS=Homo sapiens OX=9606 GN=A2ML1 PE=1 SV=3	Alpha-2-macroglobulin-like protein 1	A2ML1
sp|O15231|ZN185_HUMAN	O15231	689	73525	6	Zinc finger protein 185 OS=Homo sapiens OX=9606 GN=ZNF185 PE=1 SV=3	Zinc finger protein 185	ZNF185
sp|O43790|KRT86_HUMAN;sp|P78386|KRT85_HUMAN;sp|P78385|KRT83_HUMAN	O43790;P78386;P78385	486	53501	6	Keratin, type II cuticular Hb6 OS=Homo sapiens OX=9606 GN=KRT86 PE=1 SV=1	Keratin, type II cuticular Hb6	KRT86
sp|O75976|CBPD_HUMAN	O75976	1380	152931	6	Carboxypeptidase D OS=Homo sapiens OX=9606 GN=CPD PE=1 SV=2	Carboxypeptidase D	CPD
sp|P00338|LDHA_HUMAN;sp|Q6ZMR3|LDH6A_HUMAN;sp|P07864|LDHC_HUMAN;sp|P07195|LDHB_HUMAN	P00338;Q6ZMR3;P07864;P07195	332	36689	6	L-lactate dehydrogenase A chain OS=Homo sapiens OX=9606 GN=LDHA PE=1 SV=2	L-lactate dehydrogenase A chain	LDHA
sp|P00558|PGK1_HUMAN;sp|P07205|PGK2_HUMAN	P00558;P07205	417	44615	6	Phosphoglycerate kinase 1 OS=Homo sapiens OX=9606 GN=PGK1 PE=1 SV=3	Phosphoglycerate kinase 1	PGK1
sp|P12814|ACTN1_HUMAN	P12814	892	103058	6	Alpha-actinin-1 OS=Homo sapiens OX=9606 GN=ACTN1 PE=1 SV=2	Alpha-actinin-1	ACTN1
sp|P15502|ELN_HUMAN	P15502	786	68397	6	Elastin OS=Homo sapiens OX=9606 GN=ELN PE=1 SV=4	Elastin	ELN
sp|P78386|KRT85_HUMAN	P78386	507	55802	6	Keratin, type II cuticular Hb5 OS=Homo sapiens OX=9606 GN=KRT85 PE=1 SV=1	Keratin, type II cuticular Hb5	KRT85
sp|Q49AJ0|F135B_HUMAN	Q49AJ0	1406	155769	6	Protein FAM135B OS=Homo sapiens OX=9606 GN=FAM135B PE=1 SV=2	Protein FAM135B	FAM135B
sp|Q6E0U4|DMKN_HUMAN	Q6E0U4	476	47082	6	Dermokine OS=Homo sapiens OX=9606 GN=DMKN PE=1 SV=3	Dermokine	DMKN
sp|Q96FQ6|S10AG_HUMAN	Q96FQ6	103	11801	6	Protein S100-A16 OS=Homo sapiens OX=9606 GN=S100A16 PE=1 SV=1	Protein S100-A16	S100A16
sp|Q96JM4|LRIQ1_HUMAN	Q96JM4	1722	199299	6	Leucine-rich repeat and IQ domain-containing protein 1 OS=Homo sapiens OX=9606 GN=LRRIQ1 PE=2 SV=3	Leucine-rich repeat and IQ domain-containing protein 1	LRRIQ1
sp|A0A0B4J1V1|HV321_HUMAN;sp|P01780|HV307_HUMAN;sp|P01763|HV348_HUMAN;sp|P01762|HV311_HUMAN	A0A0B4J1V1;P01780;P01763;P01762	117	12840	5	Immunoglobulin heavy variable 3-21 OS=Homo sapiens OX=9606 GN=IGHV3-21 PE=1 SV=1	Immunoglobulin heavy variable 3-21	IGHV3-21
sp|A6NKL6|T200C_HUMAN	A6NKL6	621	63928	5	Transmembrane protein 200C OS=Homo sapiens OX=9606 GN=TMEM200C PE=2 SV=2	Transmembrane protein 200C	TMEM200C
sp|O00754|MA2B1_HUMAN	O00754	1011	113744	5	Lysosomal alpha-mannosidase OS=Homo sapiens OX=9606 GN=MAN2B1 PE=1 SV=3	Lysosomal alpha-mannosidase	MAN2B1
sp|O43609|SPY1_HUMAN	O43609	319	35122	5	Protein sprouty homolog 1 OS=Homo sapiens OX=9606 GN=SPRY1 PE=1 SV=2	Protein sprouty homolog 1	SPRY1
sp|O60361|NDK8_HUMAN;sp|P22392|NDKB_HUMAN;sp|P15531|NDKA_HUMAN	O60361;P22392;P15531	137	15529	5	Putative nucleoside diphosphate kinase OS=Homo sapiens OX=9606 GN=NME2P1 PE=5 SV=1	Putative nucleoside diphosphate kinase	NME2P1
sp|O60664|PLIN3_HUMAN	O60664	434	47075	5	Perilipin-3 OS=Homo sapiens OX=9606 GN=PLIN3 PE=1 SV=3	Perilipin-3	PLIN3
sp|O95716|RAB3D_HUMAN;sp|P20336|RAB3A_HUMAN	O95716;P20336	219	24267	5	Ras-related protein Rab-3D OS=Homo sapiens OX=9606 GN=RAB3D PE=1 SV=1	Ras-related protein Rab-3D	RAB3D
sp|P00491|PNPH_HUMAN	P00491	289	32118	5	Purine nucleoside phosphorylase OS=Homo sapiens OX=9606 GN=PNP PE=1 SV=2	Purine nucleoside phosphorylase	PNP
sp|P04156|PRIO_HUMAN	P04156	253	27661	5	Major prion protein OS=Homo sapiens OX=9606 GN=PRNP PE=1 SV=1	Major prion protein	PRNP
sp|P04233|HG2A_HUMAN	P04233	296	33516	5	HLA class II histocompatibility antigen gamma chain OS=Homo sapiens OX=9606 GN=CD74 PE=1 SV=3	HLA class II histocompatibility antigen gamma chain	CD74
sp|P07900|HS90A_HUMAN;sp|P08238|HS90B_HUMAN	P07900;P08238	732	84660	5	Heat shock protein HSP 90-alpha OS=Homo sapiens OX=9606 GN=HSP90AA1 PE=1 SV=5	Heat shock protein HSP 90-alpha	HSP90AA1
sp|P09651|ROA1_HUMAN	P09651	372	38747	5	Heterogeneous nuclear ribonucleoprotein A1 OS=Homo sapiens OX=9606 GN=HNRNPA1 PE=1 SV=5	Heterogeneous nuclear ribonucleoprotein A1	HNRNPA1
sp|P0DOX3|IGD_HUMAN	P0DOX3	512	56224	5	Immunoglobulin delta heavy chain OS=Homo sapiens OX=9606 PE=1 SV=1	Immunoglobulin delta heavy chain
sp|P0DPH7|TBA3C_HUMAN;sp|Q9BQE3|TBA1C_HUMAN;sp|Q71U36|TBA1A_HUMAN;sp|Q6PEY2|TBA3E_HUMAN;sp|P0DPH8|TBA3D_HUMAN	P0DPH7;Q9BQE3;Q71U36;Q6PEY2;P0DPH8	450	49960	5	Tubulin alpha-3C chain OS=Homo sapiens OX=9606 GN=TUBA3C PE=1 SV=1	Tubulin alpha-3C chain	TUBA3C
sp|P0DPH7|TBA3C_HUMAN;sp|Q9NY65|TBA8_HUMAN;sp|Q9BQE3|TBA1C_HUMAN;sp|Q71U36|TBA1A_HUMAN;sp|P68366|TBA4A_HUMAN;sp|P68363|TBA1B_HUMAN;sp|P0DPH8|TBA3D_HUMAN	P0DPH7;Q9NY65;Q9BQE3;Q71U36;P68366;P68363;P0DPH8	450	49960	5	Tubulin alpha-3C chain OS=Homo sapiens OX=9606 GN=TUBA3C PE=1 SV=1	Tubulin alpha-3C chain	TUBA3C
sp|P10412|H14_HUMAN;sp|Q02539|H11_HUMAN;sp|P22492|H1T_HUMAN;sp|P16403|H12_HUMAN;sp|P16402|H13_HUMAN	P10412;Q02539;P22492;P16403;P16402	219	21865	5	Histone H1.4 OS=Homo sapiens OX=9606 GN=H1-4 PE=1 SV=2	Histone H1.4	H1-4
sp|P12724|ECP_HUMAN	P12724	160	18385	5	Eosinophil cationic protein OS=Homo sapiens OX=9606 GN=RNASE3 PE=1 SV=2	Eosinophil cationic protein	RNASE3
sp|P12821|ACE_HUMAN	P12821	1306	149714	5	Angiotensin-converting enzyme OS=Homo sapiens OX=9606 GN=ACE PE=1 SV=1	Angiotensin-converting enzyme	ACE
sp|P14138|EDN3_HUMAN	P14138	238	25454	5	Endothelin-3 OS=Homo sapiens OX=9606 GN=EDN3 PE=1 SV=1	Endothelin-3	EDN3
sp|P14550|AK1A1_HUMAN	P14550	325	36573	5	Aldo-keto reductase family 1 member A1 OS=Homo sapiens OX=9606 GN=AKR1A1 PE=1 SV=3	Aldo-keto reductase family 1 member A1	AKR1A1
sp|P15153|RAC2_HUMAN;sp|P63000|RAC1_HUMAN	P15153;P63000	192	21429	5	Ras-related C3 botulinum toxin substrate 2 OS=Homo sapiens OX=9606 GN=RAC2 PE=1 SV=1	Ras-related C3 botulinum toxin substrate 2	RAC2
sp|P15259|PGAM2_HUMAN;sp|P18669|PGAM1_HUMAN	P15259;P18669	253	28766	5	Phosphoglycerate mutase 2 OS=Homo sapiens OX=9606 GN=PGAM2 PE=1 SV=3	Phosphoglycerate mutase 2	PGAM2
sp|P15259|PGAM2_HUMAN;sp|Q8N0Y7|PGAM4_HUMAN;sp|P18669|PGAM1_HUMAN	P15259;Q8N0Y7;P18669	253	28766	5	Phosphoglycerate mutase 2 OS=Homo sapiens OX=9606 GN=PGAM2 PE=1 SV=3	Phosphoglycerate mutase 2	PGAM2
sp|P22531|SPR2E_HUMAN;sp|P22532|SPR2D_HUMAN	P22531;P22532	72	7855	5	Small proline-rich protein 2E OS=Homo sapiens OX=9606 GN=SPRR2E PE=2 SV=2	Small proline-rich protein 2E	SPRR2E
sp|P42263|GRIA3_HUMAN	P42263	894	101157	5	Glutamate receptor 3 OS=Homo sapiens OX=9606 GN=GRIA3 PE=1 SV=2	Glutamate receptor 3	GRIA3
sp|P49792|RBP2_HUMAN	P49792	3224	358201	5	E3 SUMO-protein ligase RanBP2 OS=Homo sapiens OX=9606 GN=RANBP2 PE=1 SV=2	E3 SUMO-protein ligase RanBP2	RANBP2
sp|P61129|ZC3H6_HUMAN	P61129	1189	131670	5	Zinc finger CCCH domain-containing protein 6 OS=Homo sapiens OX=9606 GN=ZC3H6 PE=1 SV=2	Zinc finger CCCH domain-containing protein 6	ZC3H6
sp|Q01844|EWS_HUMAN	Q01844	656	68478	5	RNA-binding protein EWS OS=Homo sapiens OX=9606 GN=EWSR1 PE=1 SV=1	RNA-binding protein EWS	EWSR1
sp|Q709C8|VP13C_HUMAN	Q709C8	3753	422393	5	Intermembrane lipid transfer protein VPS13C OS=Homo sapiens OX=9606 GN=VPS13C PE=1 SV=1	Intermembrane lipid transfer protein VPS13C	VPS13C
sp|Q8NFY4|SEM6D_HUMAN	Q8NFY4	1073	119872	5	Semaphorin-6D OS=Homo sapiens OX=9606 GN=SEMA6D PE=1 SV=1	Semaphorin-6D	SEMA6D
sp|Q9UJF2|NGAP_HUMAN	Q9UJF2	1139	128557	5	Ras GTPase-activating protein nGAP OS=Homo sapiens OX=9606 GN=RASAL2 PE=1 SV=2	Ras GTPase-activating protein nGAP	RASAL2
sp|Q9ULZ3|ASC_HUMAN	Q9ULZ3	195	21627	5	Apoptosis-associated speck-like protein containing a CARD OS=Homo sapiens OX=9606 GN=PYCARD PE=1 SV=2	Apoptosis-associated speck-like protein containing a CARD	PYCARD
sp|A0A0C4DH72|KV106_HUMAN;sp|P04432|KVD39_HUMAN;sp|P01611|KVD12_HUMAN;sp|P01597|KV139_HUMAN;sp|A0A0C4DH73|KV112_HUMAN	A0A0C4DH72;P04432;P01611;P01597;A0A0C4DH73	117	12697	4	Immunoglobulin kappa variable 1-6 OS=Homo sapiens OX=9606 GN=IGKV1-6 PE=3 SV=1	Immunoglobulin kappa variable 1-6	IGKV1-6
sp|O14818|PSA7_HUMAN;sp|Q8TAA3|PSMA8_HUMAN	O14818;Q8TAA3	248	27887	4	Proteasome subunit alpha type-7 OS=Homo sapiens OX=9606 GN=PSMA7 PE=1 SV=1	Proteasome subunit alpha type-7	PSMA7
sp|P05386|RLA1_HUMAN	P05386	114	11514	4	Large ribosomal subunit protein P1 OS=Homo sapiens OX=9606 GN=RPLP1 PE=1 SV=1	Large ribosomal subunit protein P1	RPLP1
sp|P08134|RHOC_HUMAN;sp|P61586|RHOA_HUMAN	P08134;P61586	193	22006	4	Rho-related GTP-binding protein RhoC OS=Homo sapiens OX=9606 GN=RHOC PE=1 SV=1	Rho-related GTP-binding protein RhoC	RHOC
sp|P13726|TF_HUMAN	P13726	295	33068	4	Tissue factor OS=Homo sapiens OX=9606 GN=F3 PE=1 SV=1	Tissue factor	F3
sp|P15153|RAC2_HUMAN;sp|P63000|RAC1_HUMAN;sp|P60763|RAC3_HUMAN	P15153;P63000;P60763	192	21429	4	Ras-related C3 botulinum toxin substrate 2 OS=Homo sapiens OX=9606 GN=RAC2 PE=1 SV=1	Ras-related C3 botulinum toxin substrate 2	RAC2
sp|P21217|FUT3_HUMAN	P21217	361	42117	4	3-galactosyl-N-acetylglucosaminide 4-alpha-L-fucosyltransferase FUT3 OS=Homo sapiens OX=9606 GN=FUT3 PE=1 SV=1	3-galactosyl-N-acetylglucosaminide 4-alpha-L-fucosyltransferase FUT3	FUT3
sp|P57721|PCBP3_HUMAN;sp|Q15366|PCBP2_HUMAN	P57721;Q15366	371	39465	4	Poly(rC)-binding protein 3 OS=Homo sapiens OX=9606 GN=PCBP3 PE=1 SV=2	Poly(rC)-binding protein 3	PCBP3
sp|P67936|TPM4_HUMAN	P67936	248	28522	4	Tropomyosin alpha-4 chain OS=Homo sapiens OX=9606 GN=TPM4 PE=1 SV=3	Tropomyosin alpha-4 chain	TPM4
sp|Q06830|PRDX1_HUMAN;sp|Q13162|PRDX4_HUMAN	Q06830;Q13162	199	22110	4	Peroxiredoxin-1 OS=Homo sapiens OX=9606 GN=PRDX1 PE=1 SV=1	Peroxiredoxin-1	PRDX1
sp|Q12756|KIF1A_HUMAN	Q12756	1690	191063	4	Kinesin-like protein KIF1A OS=Homo sapiens OX=9606 GN=KIF1A PE=1 SV=2	Kinesin-like protein KIF1A	KIF1A
sp|Q14435|GALT3_HUMAN;sp|Q8NCL4|GALT6_HUMAN	Q14435;Q8NCL4	633	72610	4	Polypeptide N-acetylgalactosaminyltransferase 3 OS=Homo sapiens OX=9606 GN=GALNT3 PE=1 SV=2	Polypeptide N-acetylgalactosaminyltransferase 3	GALNT3
sp|Q15828|CYTM_HUMAN	Q15828	149	16511	4	Cystatin-M OS=Homo sapiens OX=9606 GN=CST6 PE=1 SV=1	Cystatin-M	CST6
sp|Q5JWF2|GNAS1_HUMAN	Q5JWF2	1037	111024	4	Guanine nucleotide-binding protein G(s) subunit alpha isoforms XLas OS=Homo sapiens OX=9606 GN=GNAS PE=1 SV=2	Guanine nucleotide-binding protein G(s) subunit alpha isoforms XLas	GNAS
sp|Q5TC82|RC3H1_HUMAN	Q5TC82	1133	125736	4	Roquin-1 OS=Homo sapiens OX=9606 GN=RC3H1 PE=1 SV=1	Roquin-1	RC3H1
sp|Q8N1B4|VPS52_HUMAN	Q8N1B4	723	82221	4	Vacuolar protein sorting-associated protein 52 homolog OS=Homo sapiens OX=9606 GN=VPS52 PE=1 SV=1	Vacuolar protein sorting-associated protein 52 homolog	VPS52
sp|Q8N1H7|S6OS1_HUMAN	Q8N1H7	587	68166	4	Protein SIX6OS1 OS=Homo sapiens OX=9606 GN=SIX6OS1 PE=1 SV=2	Protein SIX6OS1	SIX6OS1
sp|Q96A09|TET5B_HUMAN	Q96A09	425	46688	4	Terminal nucleotidyltransferase 5B OS=Homo sapiens OX=9606 GN=TENT5B PE=1 SV=2	Terminal nucleotidyltransferase 5B	TENT5B
sp|Q9BTW9|TBCD_HUMAN	Q9BTW9	1192	132600	4	Tubulin-specific chaperone D OS=Homo sapiens OX=9606 GN=TBCD PE=1 SV=2	Tubulin-specific chaperone D	TBCD
sp|Q9NQX5|NPDC1_HUMAN	Q9NQX5	325	34516	4	Neural proliferation differentiation and control protein 1 OS=Homo sapiens OX=9606 GN=NPDC1 PE=1 SV=2	Neural proliferation differentiation and control protein 1	NPDC1
sp|Q9NR22|ANM8_HUMAN	Q9NR22	394	45291	4	Protein arginine N-methyltransferase 8 OS=Homo sapiens OX=9606 GN=PRMT8 PE=1 SV=2	Protein arginine N-methyltransferase 8	PRMT8
sp|Q9UJU6|DBNL_HUMAN	Q9UJU6	430	48207	4	Drebrin-like protein OS=Homo sapiens OX=9606 GN=DBNL PE=1 SV=1	Drebrin-like protein	DBNL
sp|Q9UKU9|ANGL2_HUMAN	Q9UKU9	493	57105	4	Angiopoietin-related protein 2 OS=Homo sapiens OX=9606 GN=ANGPTL2 PE=1 SV=1	Angiopoietin-related protein 2	ANGPTL2
sp|Q9Y2D5|PLAK2_HUMAN	Q9Y2D5	1103	122071	4	PALM2-AKAP2 fusion protein OS=Homo sapiens OX=9606 GN=PALM2AKAP2 PE=1 SV=4	PALM2-AKAP2 fusion protein	PALM2AKAP2
sp|Q9Y3S1|WNK2_HUMAN	Q9Y3S1	2297	242673	4	Serine/threonine-protein kinase WNK2 OS=Homo sapiens OX=9606 GN=WNK2 PE=1 SV=4	Serine/threonine-protein kinase WNK2	WNK2
sp|A0A0C4DH38|HV551_HUMAN;sp|A0A0J9YXX1|HV5X1_HUMAN	A0A0C4DH38;A0A0J9YXX1	117	12675	3	Immunoglobulin heavy variable 5-51 OS=Homo sapiens OX=9606 GN=IGHV5-51 PE=3 SV=1	Immunoglobulin heavy variable 5-51	IGHV5-51
sp|A6NKT7|RGPD3_HUMAN	A6NKT7	1758	197486	3	RanBP2-like and GRIP domain-containing protein 3 OS=Homo sapiens OX=9606 GN=RGPD3 PE=3 SV=2	RanBP2-like and GRIP domain-containing protein 3	RGPD3
sp|O00468|AGRIN_HUMAN	O00468	2068	217318	3	Agrin OS=Homo sapiens OX=9606 GN=AGRN PE=1 SV=6	Agrin	AGRN
sp|O60635|TSN1_HUMAN	O60635	241	26301	3	Tetraspanin-1 OS=Homo sapiens OX=9606 GN=TSPAN1 PE=1 SV=2	Tetraspanin-1	TSPAN1
sp|O60938|KERA_HUMAN	O60938	352	40509	3	Keratocan OS=Homo sapiens OX=9606 GN=KERA PE=1 SV=1	Keratocan	KERA
sp|P00390|GSHR_HUMAN	P00390	522	56257	3	Glutathione reductase, mitochondrial OS=Homo sapiens OX=9606 GN=GSR PE=1 SV=2	Glutathione reductase, mitochondrial	GSR
sp|P01889|HLAB_HUMAN;sp|P17693|HLAG_HUMAN;sp|P13747|HLAE_HUMAN;sp|P04439|HLAA_HUMAN;sp|P01893|HLAH_HUMAN	P01889;P17693;P13747;P04439;P01893	362	40460	3	HLA class I histocompatibility antigen, B alpha chain OS=Homo sapiens OX=9606 GN=HLA-B PE=1 SV=3	HLA class I histocompatibility antigen, B alpha chain	HLA-B
sp|P05783|K1C18_HUMAN	P05783	430	48058	3	Keratin, type I cytoskeletal 18 OS=Homo sapiens OX=9606 GN=KRT18 PE=1 SV=2	Keratin, type I cytoskeletal 18	KRT18
sp|P06753|TPM3_HUMAN;sp|P67936|TPM4_HUMAN;sp|P09493|TPM1_HUMAN;sp|P07951|TPM2_HUMAN	P06753;P67936;P09493;P07951	285	32950	3	Tropomyosin alpha-3 chain OS=Homo sapiens OX=9606 GN=TPM3 PE=1 SV=2	Tropomyosin alpha-3 chain	TPM3
sp|P07195|LDHB_HUMAN	P07195	334	36639	3	L-lactate dehydrogenase B chain OS=Homo sapiens OX=9606 GN=LDHB PE=1 SV=2	L-lactate dehydrogenase B chain	LDHB
sp|P07437|TBB5_HUMAN;sp|Q9BVA1|TBB2B_HUMAN;sp|Q13885|TBB2A_HUMAN;sp|P68371|TBB4B_HUMAN	P07437;Q9BVA1;Q13885;P68371	444	49671	3	Tubulin beta chain OS=Homo sapiens OX=9606 GN=TUBB PE=1 SV=2	Tubulin beta chain	TUBB
sp|P08195|4F2_HUMAN	P08195	630	67994	3	Amino acid transporter heavy chain SLC3A2 OS=Homo sapiens OX=9606 GN=SLC3A2 PE=1 SV=3	Amino acid transporter heavy chain SLC3A2	SLC3A2
sp|P0DJI8|SAA1_HUMAN;sp|P0DJI9|SAA2_HUMAN	P0DJI8;P0DJI9	122	13532	3	Serum amyloid A-1 protein OS=Homo sapiens OX=9606 GN=SAA1 PE=1 SV=1	Serum amyloid A-1 protein	SAA1
sp|P0DMV8|HS71A_HUMAN;sp|P17066|HSP76_HUMAN;sp|P0DMV9|HS71B_HUMAN	P0DMV8;P17066;P0DMV9	641	70052	3	Heat shock 70 kDa protein 1A OS=Homo sapiens OX=9606 GN=HSPA1A PE=1 SV=1	Heat shock 70 kDa protein 1A	HSPA1A
sp|P0DPH7|TBA3C_HUMAN;sp|Q9NY65|TBA8_HUMAN;sp|Q9BQE3|TBA1C_HUMAN;sp|Q71U36|TBA1A_HUMAN;sp|Q6PEY2|TBA3E_HUMAN;sp|P68366|TBA4A_HUMAN;sp|P68363|TBA1B_HUMAN;sp|P0DPH8|TBA3D_HUMAN	P0DPH7;Q9NY65;Q9BQE3;Q71U36;Q6PEY2;P68366;P68363;P0DPH8	450	49960	3	Tubulin alpha-3C chain OS=Homo sapiens OX=9606 GN=TUBA3C PE=1 SV=1	Tubulin alpha-3C chain	TUBA3C
sp|P13796|PLSL_HUMAN;sp|P13797|PLST_HUMAN	P13796;P13797	627	70289	3	Plastin-2 OS=Homo sapiens OX=9606 GN=LCP1 PE=1 SV=6	Plastin-2	LCP1
sp|P14735|IDE_HUMAN	P14735	1019	117968	3	Insulin-degrading enzyme OS=Homo sapiens OX=9606 GN=IDE PE=1 SV=4	Insulin-degrading enzyme	IDE
sp|P14780|MMP9_HUMAN	P14780	707	78458	3	Matrix metalloproteinase-9 OS=Homo sapiens OX=9606 GN=MMP9 PE=1 SV=3	Matrix metalloproteinase-9	MMP9
sp|P24592|IBP6_HUMAN	P24592	240	25322	3	Insulin-like growth factor-binding protein 6 OS=Homo sapiens OX=9606 GN=IGFBP6 PE=1 SV=1	Insulin-like growth factor-binding protein 6	IGFBP6
sp|P27824|CALX_HUMAN	P27824	592	67568	3	Calnexin OS=Homo sapiens OX=9606 GN=CANX PE=1 SV=2	Calnexin	CANX
sp|P28062|PSB8_HUMAN	P28062	276	30354	3	Proteasome subunit beta type-8 OS=Homo sapiens OX=9606 GN=PSMB8 PE=1 SV=3	Proteasome subunit beta type-8	PSMB8
sp|P28749|RBL1_HUMAN	P28749	1068	120847	3	Retinoblastoma-like protein 1 OS=Homo sapiens OX=9606 GN=RBL1 PE=1 SV=3	Retinoblastoma-like protein 1	RBL1
sp|P35542|SAA4_HUMAN	P35542	130	14747	3	Serum amyloid A-4 protein OS=Homo sapiens OX=9606 GN=SAA4 PE=1 SV=2	Serum amyloid A-4 protein	SAA4
sp|P38919|IF4A3_HUMAN	P38919	411	46871	3	Eukaryotic initiation factor 4A-III OS=Homo sapiens OX=9606 GN=EIF4A3 PE=1 SV=4	Eukaryotic initiation factor 4A-III	EIF4A3
sp|P40926|MDHM_HUMAN	P40926	338	35503	3	Malate dehydrogenase, mitochondrial OS=Homo sapiens OX=9606 GN=MDH2 PE=1 SV=3	Malate dehydrogenase, mitochondrial	MDH2
sp|P41218|MNDA_HUMAN	P41218	407	45836	3	Myeloid cell nuclear differentiation antigen OS=Homo sapiens OX=9606 GN=MNDA PE=1 SV=1	Myeloid cell nuclear differentiation antigen	MNDA
sp|P54652|HSP72_HUMAN	P54652	639	70021	3	Heat shock-related 70 kDa protein 2 OS=Homo sapiens OX=9606 GN=HSPA2 PE=1 SV=1	Heat shock-related 70 kDa protein 2	HSPA2
sp|P60842|IF4A1_HUMAN;sp|Q14240|IF4A2_HUMAN	P60842;Q14240	406	46154	3	Eukaryotic initiation factor 4A-I OS=Homo sapiens OX=9606 GN=EIF4A1 PE=1 SV=1	Eukaryotic initiation factor 4A-I	EIF4A1
sp|P61106|RAB14_HUMAN	P61106	215	23897	3	Ras-related protein Rab-14 OS=Homo sapiens OX=9606 GN=RAB14 PE=1 SV=4	Ras-related protein Rab-14	RAB14
sp|P63241|IF5A1_HUMAN;sp|Q9GZV4|IF5A2_HUMAN;sp|Q6IS14|IF5AL_HUMAN	P63241;Q9GZV4;Q6IS14	154	16832	3	Eukaryotic translation initiation factor 5A-1 OS=Homo sapiens OX=9606 GN=EIF5A PE=1 SV=2	Eukaryotic translation initiation factor 5A-1	EIF5A
sp|P69905|HBA_HUMAN	P69905	142	15258	3	Hemoglobin subunit alpha OS=Homo sapiens OX=9606 GN=HBA1 PE=1 SV=2	Hemoglobin subunit alpha	HBA1
sp|Q01518|CAP1_HUMAN	Q01518	475	51902	3	Adenylyl cyclase-associated protein 1 OS=Homo sapiens OX=9606 GN=CAP1 PE=1 SV=5	Adenylyl cyclase-associated protein 1	CAP1
sp|Q04609|FOLH1_HUMAN;sp|Q9HBA9|FOH1B_HUMAN	Q04609;Q9HBA9	750	84331	3	Glutamate carboxypeptidase 2 OS=Homo sapiens OX=9606 GN=FOLH1 PE=1 SV=1	Glutamate carboxypeptidase 2	FOLH1
sp|Q12907|LMAN2_HUMAN	Q12907	356	40229	3	Vesicular integral-membrane protein VIP36 OS=Homo sapiens OX=9606 GN=LMAN2 PE=1 SV=1	Vesicular integral-membrane protein VIP36	LMAN2
sp|Q15084|PDIA6_HUMAN	Q15084	440	48121	3	Protein disulfide-isomerase A6 OS=Homo sapiens OX=9606 GN=PDIA6 PE=1 SV=1	Protein disulfide-isomerase A6	PDIA6
sp|Q15365|PCBP1_HUMAN	Q15365	356	37498	3	Poly(rC)-binding protein 1 OS=Homo sapiens OX=9606 GN=PCBP1 PE=1 SV=2	Poly(rC)-binding protein 1	PCBP1
sp|Q16769|QPCT_HUMAN	Q16769	361	40877	3	Glutaminyl-peptide cyclotransferase OS=Homo sapiens OX=9606 GN=QPCT PE=1 SV=1	Glutaminyl-peptide cyclotransferase	QPCT
sp|Q2I0M4|LRC26_HUMAN	Q2I0M4	334	34857	3	Leucine-rich repeat-containing protein 26 OS=Homo sapiens OX=9606 GN=LRRC26 PE=1 SV=2	Leucine-rich repeat-containing protein 26	LRRC26
sp|Q2PPJ7|RGPA2_HUMAN	Q2PPJ7	1873	210768	3	Ral GTPase-activating protein subunit alpha-2 OS=Homo sapiens OX=9606 GN=RALGAPA2 PE=1 SV=2	Ral GTPase-activating protein subunit alpha-2	RALGAPA2
sp|Q5EBL2|ZN628_HUMAN	Q5EBL2	1059	110887	3	Zinc finger protein 628 OS=Homo sapiens OX=9606 GN=ZNF628 PE=1 SV=3	Zinc finger protein 628	ZNF628
sp|Q7RTW8|OTOAN_HUMAN	Q7RTW8	1153	128532	3	Otoancorin OS=Homo sapiens OX=9606 GN=OTOA PE=1 SV=1	Otoancorin	OTOA
sp|Q8IWU5|SULF2_HUMAN	Q8IWU5	870	100455	3	Extracellular sulfatase Sulf-2 OS=Homo sapiens OX=9606 GN=SULF2 PE=1 SV=1	Extracellular sulfatase Sulf-2	SULF2
sp|Q8IZA0|K319L_HUMAN	Q8IZA0	1049	115658	3	Dyslexia-associated protein KIAA0319-like protein OS=Homo sapiens OX=9606 GN=KIAA0319L PE=1 SV=2	Dyslexia-associated protein KIAA0319-like protein	KIAA0319L
sp|Q8N1A0|KT222_HUMAN	Q8N1A0	295	34158	3	Keratin-like protein KRT222 OS=Homo sapiens OX=9606 GN=KRT222 PE=1 SV=1	Keratin-like protein KRT222	KRT222
sp|Q8WTW4|NPRL2_HUMAN	Q8WTW4	380	43658	3	GATOR1 complex protein NPRL2 OS=Homo sapiens OX=9606 GN=NPRL2 PE=1 SV=2	GATOR1 complex protein NPRL2	NPRL2
sp|Q8WWY7|WFD12_HUMAN	Q8WWY7	111	12050	3	WAP four-disulfide core domain protein 12 OS=Homo sapiens OX=9606 GN=WFDC12 PE=1 SV=1	WAP four-disulfide core domain protein 12	WFDC12
sp|Q92520|FAM3C_HUMAN	Q92520	227	24680	3	Protein FAM3C OS=Homo sapiens OX=9606 GN=FAM3C PE=1 SV=1	Protein FAM3C	FAM3C
sp|Q969X2|SIA7F_HUMAN	Q969X2	333	38068	3	Alpha-N-acetylgalactosaminide alpha-2,6-sialyltransferase 6 OS=Homo sapiens OX=9606 GN=ST6GALNAC6 PE=1 SV=1	Alpha-N-acetylgalactosaminide alpha-2,6-sialyltransferase 6	ST6GALNAC6
sp|Q96T17|MA7D2_HUMAN	Q96T17	732	81965	3	MAP7 domain-containing protein 2 OS=Homo sapiens OX=9606 GN=MAP7D2 PE=1 SV=2	MAP7 domain-containing protein 2	MAP7D2
sp|Q9BZ23|PANK2_HUMAN	Q9BZ23	570	62681	3	Pantothenate kinase 2, mitochondrial OS=Homo sapiens OX=9606 GN=PANK2 PE=1 SV=3	Pantothenate kinase 2, mitochondrial	PANK2
sp|Q9P2K8|E2AK4_HUMAN	Q9P2K8	1649	186909	3	eIF-2-alpha kinase GCN2 OS=Homo sapiens OX=9606 GN=EIF2AK4 PE=1 SV=3	eIF-2-alpha kinase GCN2	EIF2AK4
sp|Q9UBS3|DNJB9_HUMAN	Q9UBS3	223	25518	3	DnaJ homolog subfamily B member 9 OS=Homo sapiens OX=9606 GN=DNAJB9 PE=1 SV=1	DnaJ homolog subfamily B member 9	DNAJB9
Reverse_sp|Q8WY54|PPM1E_HUMAN	Q8WY54	755	83952	2	Protein phosphatase 1E OS=Homo sapiens OX=9606 GN=PPM1E PE=1 SV=3	Protein phosphatase 1E	PPM1E
sp|A0A1B0GTS1|HSFX4_HUMAN;sp|A0A1B0GWH4|HSFX3_HUMAN	A0A1B0GTS1;A0A1B0GWH4	333	37155	2	Heat shock transcription factor, X-linked member 4 OS=Homo sapiens OX=9606 GN=HSFX4 PE=3 SV=1	Heat shock transcription factor, X-linked member 4	HSFX4
sp|A6NIZ1|RP1BL_HUMAN;sp|P61224|RAP1B_HUMAN	A6NIZ1;P61224	184	20925	2	Ras-related protein Rap-1b-like protein OS=Homo sapiens OX=9606 GN=RAP1BL PE=2 SV=1	Ras-related protein Rap-1b-like protein	RAP1BL
sp|O15439|MRP4_HUMAN	O15439	1325	149526	2	ATP-binding cassette sub-family C member 4 OS=Homo sapiens OX=9606 GN=ABCC4 PE=1 SV=3	ATP-binding cassette sub-family C member 4	ABCC4
sp|O43240|KLK10_HUMAN	O43240	276	30170	2	Kallikrein-10 OS=Homo sapiens OX=9606 GN=KLK10 PE=1 SV=3	Kallikrein-10	KLK10
sp|O43286|B4GT5_HUMAN;sp|P15291|B4GT1_HUMAN	O43286;P15291	388	45119	2	Beta-1,4-galactosyltransferase 5 OS=Homo sapiens OX=9606 GN=B4GALT5 PE=1 SV=1	Beta-1,4-galactosyltransferase 5	B4GALT5
sp|O60603|TLR2_HUMAN	O60603	784	89838	2	Toll-like receptor 2 OS=Homo sapiens OX=9606 GN=TLR2 PE=1 SV=1	Toll-like receptor 2	TLR2
sp|O75128|COBL_HUMAN	O75128	1261	135617	2	Protein cordon-bleu OS=Homo sapiens OX=9606 GN=COBL PE=1 SV=2	Protein cordon-bleu	COBL
sp|O75594|PGRP1_HUMAN	O75594	196	21731	2	Peptidoglycan recognition protein 1 OS=Homo sapiens OX=9606 GN=PGLYRP1 PE=1 SV=1	Peptidoglycan recognition protein 1	PGLYRP1
sp|O75828|CBR3_HUMAN;sp|P16152|CBR1_HUMAN	O75828;P16152	277	30850	2	Carbonyl reductase [NADPH] 3 OS=Homo sapiens OX=9606 GN=CBR3 PE=1 SV=3	Carbonyl reductase [NADPH] 3	CBR3
sp|O95716|RAB3D_HUMAN;sp|Q9NRW1|RAB6B_HUMAN;sp|Q9H0U4|RAB1B_HUMAN;sp|Q9H082|RB33B_HUMAN;sp|Q96E17|RAB3C_HUMAN;sp|Q96DA2|RB39B_HUMAN;sp|Q96AX2|RAB37_HUMAN;sp|Q92930|RAB8B_HUMAN;sp|Q92928|RAB1C_HUMAN;sp|Q86YS6|RAB43_HUMAN;sp|Q6IQ22|RAB12_HUMAN;sp|Q15771|RAB30_HUMAN;sp|Q15286|RAB35_HUMAN;sp|Q14964|RB39A_HUMAN;sp|P62820|RAB1A_HUMAN;sp|P61106|RAB14_HUMAN;sp|P61026|RAB10_HUMAN;sp|P61018|RAB4B_HUMAN;sp|…	O95716;Q9NRW1;Q9H0U4;Q9H082;Q96E17;Q96DA2;Q96AX2;Q92930;Q92928;Q86YS6;Q6IQ22;Q15771;Q15286;Q14964;P62820;P61106;P61026;P61018;P61006;P59190;P20340;P20338;P20337;P20336	219	24267	2	Ras-related protein Rab-3D OS=Homo sapiens OX=9606 GN=RAB3D PE=1 SV=1	Ras-related protein Rab-3D	RAB3D
sp|P01848|TRAC_HUMAN;sp|P0DTU3|TRAR2_HUMAN;sp|P0DSE1|TRAR1_HUMAN	P01848;P0DTU3;P0DSE1	140	15717	2	T cell receptor alpha chain constant OS=Homo sapiens OX=9606 GN=TRAC PE=1 SV=2	T cell receptor alpha chain constant	TRAC
sp|P02766|TTHY_HUMAN	P02766	147	15887	2	Transthyretin OS=Homo sapiens OX=9606 GN=TTR PE=1 SV=1	Transthyretin	TTR
sp|P04350|TBB4A_HUMAN;sp|Q9BVA1|TBB2B_HUMAN;sp|Q9BUF5|TBB6_HUMAN;sp|Q13885|TBB2A_HUMAN;sp|Q13509|TBB3_HUMAN;sp|P68371|TBB4B_HUMAN;sp|P07437|TBB5_HUMAN	P04350;Q9BVA1;Q9BUF5;Q13885;Q13509;P68371;P07437	444	49586	2	Tubulin beta-4A chain OS=Homo sapiens OX=9606 GN=TUBB4A PE=1 SV=2	Tubulin beta-4A chain	TUBB4A
sp|P05362|ICAM1_HUMAN	P05362	532	57825	2	Intercellular adhesion molecule 1 OS=Homo sapiens OX=9606 GN=ICAM1 PE=1 SV=2	Intercellular adhesion molecule 1	ICAM1
sp|P06733|ENOA_HUMAN;sp|P13929|ENOB_HUMAN	P06733;P13929	434	47169	2	Alpha-enolase OS=Homo sapiens OX=9606 GN=ENO1 PE=1 SV=2	Alpha-enolase	ENO1
sp|P09668|CATH_HUMAN	P09668	335	37394	2	Pro-cathepsin H OS=Homo sapiens OX=9606 GN=CTSH PE=1 SV=4	Pro-cathepsin H	CTSH
sp|P09669|COX6C_HUMAN	P09669	75	8781	2	Cytochrome c oxidase subunit 6C OS=Homo sapiens OX=9606 GN=COX6C PE=1 SV=2	Cytochrome c oxidase subunit 6C	COX6C
sp|P0CG47|UBB_HUMAN;sp|P62987|RL40_HUMAN;sp|P62979|RS27A_HUMAN;sp|P0CG48|UBC_HUMAN	P0CG47;P62987;P62979;P0CG48	229	25762	2	Polyubiquitin-B OS=Homo sapiens OX=9606 GN=UBB PE=1 SV=1	Polyubiquitin-B	UBB
sp|P13693|TCTP_HUMAN	P13693	172	19595	2	Translationally-controlled tumor protein OS=Homo sapiens OX=9606 GN=TPT1 PE=1 SV=1	Translationally-controlled tumor protein	TPT1
sp|P13796|PLSL_HUMAN	P13796	627	70289	2	Plastin-2 OS=Homo sapiens OX=9606 GN=LCP1 PE=1 SV=6	Plastin-2	LCP1
sp|P14854|CX6B1_HUMAN	P14854	86	10192	2	Cytochrome c oxidase subunit 6B1 OS=Homo sapiens OX=9606 GN=COX6B1 PE=1 SV=2	Cytochrome c oxidase subunit 6B1	COX6B1
sp|P17655|CAN2_HUMAN	P17655	700	79995	2	Calpain-2 catalytic subunit OS=Homo sapiens OX=9606 GN=CAPN2 PE=1 SV=6	Calpain-2 catalytic subunit	CAPN2
sp|P19087|GNAT2_HUMAN	P19087	354	40176	2	Guanine nucleotide-binding protein G(t) subunit alpha-2 OS=Homo sapiens OX=9606 GN=GNAT2 PE=1 SV=4	Guanine nucleotide-binding protein G(t) subunit alpha-2	GNAT2
sp|P20340|RAB6A_HUMAN	P20340	208	23593	2	Ras-related protein Rab-6A OS=Homo sapiens OX=9606 GN=RAB6A PE=1 SV=3	Ras-related protein Rab-6A	RAB6A
sp|P22735|TGM1_HUMAN	P22735	817	89787	2	Protein-glutamine gamma-glutamyltransferase K OS=Homo sapiens OX=9606 GN=TGM1 PE=1 SV=4	Protein-glutamine gamma-glutamyltransferase K	TGM1
sp|P31151|S10A7_HUMAN;sp|Q86SG5|S1A7A_HUMAN	P31151;Q86SG5	101	11471	2	Protein S100-A7 OS=Homo sapiens OX=9606 GN=S100A7 PE=1 SV=4	Protein S100-A7	S100A7
sp|P31946|1433B_HUMAN;sp|P61981|1433G_HUMAN	P31946;P61981	246	28082	2	14-3-3 protein beta/alpha OS=Homo sapiens OX=9606 GN=YWHAB PE=1 SV=3	14-3-3 protein beta/alpha	YWHAB
sp|P32298|GRK4_HUMAN;sp|P43250|GRK6_HUMAN;sp|P34947|GRK5_HUMAN	P32298;P43250;P34947	578	66583	2	G protein-coupled receptor kinase 4 OS=Homo sapiens OX=9606 GN=GRK4 PE=1 SV=3	G protein-coupled receptor kinase 4	GRK4
sp|P36873|PP1G_HUMAN	P36873	323	36984	2	Serine/threonine-protein phosphatase PP1-gamma catalytic subunit OS=Homo sapiens OX=9606 GN=PPP1CC PE=1 SV=1	Serine/threonine-protein phosphatase PP1-gamma catalytic subunit	PPP1CC
sp|P38919|IF4A3_HUMAN;sp|Q14240|IF4A2_HUMAN;sp|P60842|IF4A1_HUMAN	P38919;Q14240;P60842	411	46871	2	Eukaryotic initiation factor 4A-III OS=Homo sapiens OX=9606 GN=EIF4A3 PE=1 SV=4	Eukaryotic initiation factor 4A-III	EIF4A3
sp|P50452|SPB8_HUMAN	P50452	374	42767	2	Serpin B8 OS=Homo sapiens OX=9606 GN=SERPINB8 PE=1 SV=2	Serpin B8	SERPINB8
sp|P61018|RAB4B_HUMAN	P61018	213	23587	2	Ras-related protein Rab-4B OS=Homo sapiens OX=9606 GN=RAB4B PE=1 SV=1	Ras-related protein Rab-4B	RAB4B
sp|P61978|HNRPK_HUMAN	P61978	463	50976	2	Heterogeneous nuclear ribonucleoprotein K OS=Homo sapiens OX=9606 GN=HNRNPK PE=1 SV=1	Heterogeneous nuclear ribonucleoprotein K	HNRNPK
sp|Q13228|SBP1_HUMAN	Q13228	472	52391	2	Methanethiol oxidase OS=Homo sapiens OX=9606 GN=SELENBP1 PE=1 SV=2	Methanethiol oxidase	SELENBP1
sp|Q13873|BMPR2_HUMAN	Q13873	1038	115201	2	Bone morphogenetic protein receptor type-2 OS=Homo sapiens OX=9606 GN=BMPR2 PE=1 SV=2	Bone morphogenetic protein receptor type-2	BMPR2
sp|Q14532|K1H2_HUMAN	Q14532	448	50343	2	Keratin, type I cuticular Ha2 OS=Homo sapiens OX=9606 GN=KRT32 PE=1 SV=3	Keratin, type I cuticular Ha2	KRT32
sp|Q14624|ITIH4_HUMAN	Q14624	930	103357	2	Inter-alpha-trypsin inhibitor heavy chain H4 OS=Homo sapiens OX=9606 GN=ITIH4 PE=1 SV=4	Inter-alpha-trypsin inhibitor heavy chain H4	ITIH4
sp|Q14651|PLSI_HUMAN	Q14651	629	70254	2	Plastin-1 OS=Homo sapiens OX=9606 GN=PLS1 PE=1 SV=2	Plastin-1	PLS1
sp|Q14746|COG2_HUMAN	Q14746	738	83208	2	Conserved oligomeric Golgi complex subunit 2 OS=Homo sapiens OX=9606 GN=COG2 PE=1 SV=1	Conserved oligomeric Golgi complex subunit 2	COG2
sp|Q16706|MA2A1_HUMAN	Q16706	1144	131140	2	Alpha-mannosidase 2 OS=Homo sapiens OX=9606 GN=MAN2A1 PE=1 SV=2	Alpha-mannosidase 2	MAN2A1
sp|Q2M3V2|SWAHA_HUMAN	Q2M3V2	549	57409	2	Ankyrin repeat domain-containing protein SOWAHA OS=Homo sapiens OX=9606 GN=SOWAHA PE=1 SV=4	Ankyrin repeat domain-containing protein SOWAHA	SOWAHA
sp|Q3MIT2|PUS10_HUMAN	Q3MIT2	529	60244	2	tRNA pseudouridine synthase Pus10 OS=Homo sapiens OX=9606 GN=PUS10 PE=1 SV=1	tRNA pseudouridine synthase Pus10	PUS10
sp|Q58FF6|H90B4_HUMAN	Q58FF6	505	58264	2	Putative heat shock protein HSP 90-beta 4 OS=Homo sapiens OX=9606 GN=HSP90AB4P PE=5 SV=1	Putative heat shock protein HSP 90-beta 4	HSP90AB4P
sp|Q5SXM1|ZN678_HUMAN	Q5SXM1	525	61411	2	Zinc finger protein 678 OS=Homo sapiens OX=9606 GN=ZNF678 PE=2 SV=1	Zinc finger protein 678	ZNF678
sp|Q5T655|CFA58_HUMAN	Q5T655	872	103417	2	Cilia- and flagella-associated protein 58 OS=Homo sapiens OX=9606 GN=CFAP58 PE=1 SV=1	Cilia- and flagella-associated protein 58	CFAP58
sp|Q68DK2|ZFY26_HUMAN	Q68DK2	2539	284601	2	Zinc finger FYVE domain-containing protein 26 OS=Homo sapiens OX=9606 GN=ZFYVE26 PE=1 SV=4	Zinc finger FYVE domain-containing protein 26	ZFYVE26
sp|Q6IS14|IF5AL_HUMAN	Q6IS14	154	16773	2	Eukaryotic translation initiation factor 5A-1-like OS=Homo sapiens OX=9606 GN=EIF5AL1 PE=2 SV=2	Eukaryotic translation initiation factor 5A-1-like	EIF5AL1
sp|Q6P6B7|ANR16_HUMAN	Q6P6B7	361	39284	2	Ankyrin repeat domain-containing protein 16 OS=Homo sapiens OX=9606 GN=ANKRD16 PE=1 SV=1	Ankyrin repeat domain-containing protein 16	ANKRD16
sp|Q7Z333|SETX_HUMAN	Q7Z333	2677	302879	2	Probable helicase senataxin OS=Homo sapiens OX=9606 GN=SETX PE=1 SV=4	Probable helicase senataxin	SETX
sp|Q7Z5L0|VMO1_HUMAN	Q7Z5L0	202	21534	2	Vitelline membrane outer layer protein 1 homolog OS=Homo sapiens OX=9606 GN=VMO1 PE=1 SV=1	Vitelline membrane outer layer protein 1 homolog	VMO1
sp|Q86YS6|RAB43_HUMAN	Q86YS6	212	23339	2	Ras-related protein Rab-43 OS=Homo sapiens OX=9606 GN=RAB43 PE=1 SV=1	Ras-related protein Rab-43	RAB43
sp|Q8IWT3|CUL9_HUMAN	Q8IWT3	2517	281227	2	Cullin-9 OS=Homo sapiens OX=9606 GN=CUL9 PE=1 SV=2	Cullin-9	CUL9
sp|Q8IXL6|FA20C_HUMAN	Q8IXL6	584	66235	2	Extracellular serine/threonine protein kinase FAM20C OS=Homo sapiens OX=9606 GN=FAM20C PE=1 SV=2	Extracellular serine/threonine protein kinase FAM20C	FAM20C
sp|Q8NDV3|SMC1B_HUMAN	Q8NDV3	1235	143788	2	Structural maintenance of chromosomes protein 1B OS=Homo sapiens OX=9606 GN=SMC1B PE=2 SV=3	Structural maintenance of chromosomes protein 1B	SMC1B
sp|Q8NFL0|B3GN7_HUMAN	Q8NFL0	401	45987	2	UDP-GlcNAc:betaGal beta-1,3-N-acetylglucosaminyltransferase 7 OS=Homo sapiens OX=9606 GN=B3GNT7 PE=1 SV=1	UDP-GlcNAc:betaGal beta-1,3-N-acetylglucosaminyltransferase 7	B3GNT7
sp|Q8TE60|ATS18_HUMAN	Q8TE60	1221	135167	2	A disintegrin and metalloproteinase with thrombospondin motifs 18 OS=Homo sapiens OX=9606 GN=ADAMTS18 PE=1 SV=3	A disintegrin and metalloproteinase with thrombospondin motifs 18	ADAMTS18
sp|Q8TEC5|SH3R2_HUMAN	Q8TEC5	729	79320	2	E3 ubiquitin-protein ligase SH3RF2 OS=Homo sapiens OX=9606 GN=SH3RF2 PE=1 SV=3	E3 ubiquitin-protein ligase SH3RF2	SH3RF2
sp|Q969H8|MYDGF_HUMAN	Q969H8	173	18795	2	Myeloid-derived growth factor OS=Homo sapiens OX=9606 GN=MYDGF PE=1 SV=1	Myeloid-derived growth factor	MYDGF
sp|Q96KS9|F167A_HUMAN	Q96KS9	214	24182	2	Protein FAM167A OS=Homo sapiens OX=9606 GN=FAM167A PE=1 SV=1	Protein FAM167A	FAM167A
sp|Q9C0C7|AMRA1_HUMAN	Q9C0C7	1298	142507	2	Activating molecule in BECN1-regulated autophagy protein 1 OS=Homo sapiens OX=9606 GN=AMBRA1 PE=1 SV=2	Activating molecule in BECN1-regulated autophagy protein 1	AMBRA1
sp|Q9C0I1|MTMRC_HUMAN	Q9C0I1	747	86148	2	Myotubularin-related protein 12 OS=Homo sapiens OX=9606 GN=MTMR12 PE=1 SV=2	Myotubularin-related protein 12	MTMR12
sp|Q9H6S3|ES8L2_HUMAN	Q9H6S3	715	80621	2	Epidermal growth factor receptor kinase substrate 8-like protein 2 OS=Homo sapiens OX=9606 GN=EPS8L2 PE=1 SV=2	Epidermal growth factor receptor kinase substrate 8-like protein 2	EPS8L2
sp|Q9H9T3|ELP3_HUMAN	Q9H9T3	547	62259	2	Elongator complex protein 3 OS=Homo sapiens OX=9606 GN=ELP3 PE=1 SV=2	Elongator complex protein 3	ELP3
sp|Q9HBJ7|UBP29_HUMAN	Q9HBJ7	922	104156	2	Ubiquitin carboxyl-terminal hydrolase 29 OS=Homo sapiens OX=9606 GN=USP29 PE=2 SV=1	Ubiquitin carboxyl-terminal hydrolase 29	USP29
sp|Q9P2D3|HTR5B_HUMAN	Q9P2D3	2071	224300	2	HEAT repeat-containing protein 5B OS=Homo sapiens OX=9606 GN=HEATR5B PE=1 SV=2	HEAT repeat-containing protein 5B	HEATR5B
sp|Q9UGL9|CRCT1_HUMAN	Q9UGL9	99	9736	2	Cysteine-rich C-terminal protein 1 OS=Homo sapiens OX=9606 GN=CRCT1 PE=1 SV=1	Cysteine-rich C-terminal protein 1	CRCT1
sp|Q9UN36|NDRG2_HUMAN	Q9UN36	371	40798	2	Protein NDRG2 OS=Homo sapiens OX=9606 GN=NDRG2 PE=1 SV=2	Protein NDRG2	NDRG2
sp|Q9UNK4|PA2GD_HUMAN	Q9UNK4	145	16546	2	Group IID secretory phospholipase A2 OS=Homo sapiens OX=9606 GN=PLA2G2D PE=1 SV=2	Group IID secretory phospholipase A2	PLA2G2D
sp|Q9UPY3|DICER_HUMAN	Q9UPY3	1922	218680	2	Endoribonuclease Dicer OS=Homo sapiens OX=9606 GN=DICER1 PE=1 SV=3	Endoribonuclease Dicer	DICER1
sp|O14976|GAK_HUMAN	O14976	1311	143190	1	Cyclin-G-associated kinase OS=Homo sapiens OX=9606 GN=GAK PE=1 SV=2	Cyclin-G-associated kinase	GAK
sp|O15031|PLXB2_HUMAN	O15031	1838	205126	1	Plexin-B2 OS=Homo sapiens OX=9606 GN=PLXNB2 PE=1 SV=3	Plexin-B2	PLXNB2
sp|O15440|MRP5_HUMAN;sp|Q96J66|MRP8_HUMAN;sp|Q96J65|MRP9_HUMAN	O15440;Q96J66;Q96J65	1437	160660	1	ATP-binding cassette sub-family C member 5 OS=Homo sapiens OX=9606 GN=ABCC5 PE=1 SV=2	ATP-binding cassette sub-family C member 5	ABCC5
sp|O43278|SPIT1_HUMAN	O43278	529	58398	1	Kunitz-type protease inhibitor 1 OS=Homo sapiens OX=9606 GN=SPINT1 PE=1 SV=2	Kunitz-type protease inhibitor 1	SPINT1
sp|O60613|SEP15_HUMAN	O60613	165	17942	1	Selenoprotein F OS=Homo sapiens OX=9606 GN=SELENOF PE=1 SV=4	Selenoprotein F	SELENOF
sp|O75342|LX12B_HUMAN	O75342	701	80356	1	Arachidonate 12-lipoxygenase, 12R-type OS=Homo sapiens OX=9606 GN=ALOX12B PE=1 SV=1	Arachidonate 12-lipoxygenase, 12R-type	ALOX12B
sp|O75355|ENTP3_HUMAN	O75355	529	59105	1	Ectonucleoside triphosphate diphosphohydrolase 3 OS=Homo sapiens OX=9606 GN=ENTPD3 PE=1 SV=2	Ectonucleoside triphosphate diphosphohydrolase 3	ENTPD3
sp|O75503|CLN5_HUMAN	O75503	358	41497	1	Ceroid-lipofuscinosis neuronal protein 5 OS=Homo sapiens OX=9606 GN=CLN5 PE=1 SV=2	Ceroid-lipofuscinosis neuronal protein 5	CLN5
sp|P01705|LV223_HUMAN	P01705	113	11893	1	Immunoglobulin lambda variable 2-23 OS=Homo sapiens OX=9606 GN=IGLV2-23 PE=1 SV=2	Immunoglobulin lambda variable 2-23	IGLV2-23
sp|P02042|HBD_HUMAN;sp|P68871|HBB_HUMAN	P02042;P68871	147	16055	1	Hemoglobin subunit delta OS=Homo sapiens OX=9606 GN=HBD PE=1 SV=2	Hemoglobin subunit delta	HBD
sp|P06748|NPM_HUMAN	P06748	294	32575	1	Nucleophosmin OS=Homo sapiens OX=9606 GN=NPM1 PE=1 SV=2	Nucleophosmin	NPM1
sp|P09467|F16P1_HUMAN	P09467	338	36842	1	Fructose-1,6-bisphosphatase 1 OS=Homo sapiens OX=9606 GN=FBP1 PE=1 SV=5	Fructose-1,6-bisphosphatase 1	FBP1
sp|P0DMV8|HS71A_HUMAN;sp|P54652|HSP72_HUMAN;sp|P48741|HSP77_HUMAN;sp|P34931|HS71L_HUMAN;sp|P17066|HSP76_HUMAN;sp|P11142|HSP7C_HUMAN;sp|P11021|BIP_HUMAN;sp|P0DMV9|HS71B_HUMAN	P0DMV8;P54652;P48741;P34931;P17066;P11142;P11021;P0DMV9	641	70052	1	Heat shock 70 kDa protein 1A OS=Homo sapiens OX=9606 GN=HSPA1A PE=1 SV=1	Heat shock 70 kDa protein 1A	HSPA1A
sp|P11142|HSP7C_HUMAN;sp|P54652|HSP72_HUMAN	P11142;P54652	646	70898	1	Heat shock cognate 71 kDa protein OS=Homo sapiens OX=9606 GN=HSPA8 PE=1 SV=1	Heat shock cognate 71 kDa protein	HSPA8
sp|P11802|CDK4_HUMAN	P11802	303	33730	1	Cyclin-dependent kinase 4 OS=Homo sapiens OX=9606 GN=CDK4 PE=1 SV=2	Cyclin-dependent kinase 4	CDK4
sp|P13928|ANXA8_HUMAN;sp|Q5VT79|AXA81_HUMAN	P13928;Q5VT79	327	36881	1	Annexin A8 OS=Homo sapiens OX=9606 GN=ANXA8 PE=1 SV=3	Annexin A8	ANXA8
sp|P17181|INAR1_HUMAN;sp|Q9BVA6|FICD_HUMAN	P17181;Q9BVA6	557	63525	1	Interferon alpha/beta receptor 1 OS=Homo sapiens OX=9606 GN=IFNAR1 PE=1 SV=3	Interferon alpha/beta receptor 1	IFNAR1
sp|P17302|CXA1_HUMAN	P17302	382	43008	1	Gap junction alpha-1 protein OS=Homo sapiens OX=9606 GN=GJA1 PE=1 SV=2	Gap junction alpha-1 protein	GJA1
sp|P20042|IF2B_HUMAN	P20042	333	38388	1	Eukaryotic translation initiation factor 2 subunit 2 OS=Homo sapiens OX=9606 GN=EIF2S2 PE=1 SV=2	Eukaryotic translation initiation factor 2 subunit 2	EIF2S2
sp|P21964|COMT_HUMAN	P21964	271	30037	1	Catechol O-methyltransferase OS=Homo sapiens OX=9606 GN=COMT PE=1 SV=2	Catechol O-methyltransferase	COMT
sp|P22307|SCP2_HUMAN	P22307	547	58994	1	Sterol carrier protein 2 OS=Homo sapiens OX=9606 GN=SCP2 PE=1 SV=2	Sterol carrier protein 2	SCP2
sp|P22314|UBA1_HUMAN	P22314	1058	117849	1	Ubiquitin-like modifier-activating enzyme 1 OS=Homo sapiens OX=9606 GN=UBA1 PE=1 SV=3	Ubiquitin-like modifier-activating enzyme 1	UBA1
sp|P22692|IBP4_HUMAN	P22692	258	27934	1	Insulin-like growth factor-binding protein 4 OS=Homo sapiens OX=9606 GN=IGFBP4 PE=1 SV=2	Insulin-like growth factor-binding protein 4	IGFBP4
sp|P26641|EF1G_HUMAN	P26641	437	50119	1	Elongation factor 1-gamma OS=Homo sapiens OX=9606 GN=EEF1G PE=1 SV=3	Elongation factor 1-gamma	EEF1G
sp|P28331|NDUS1_HUMAN	P28331	727	79468	1	NADH-ubiquinone oxidoreductase 75 kDa subunit, mitochondrial OS=Homo sapiens OX=9606 GN=NDUFS1 PE=1 SV=3	NADH-ubiquinone oxidoreductase 75 kDa subunit, mitochondrial	NDUFS1
sp|P36873|PP1G_HUMAN;sp|P62140|PP1B_HUMAN;sp|P62136|PP1A_HUMAN	P36873;P62140;P62136	323	36984	1	Serine/threonine-protein phosphatase PP1-gamma catalytic subunit OS=Homo sapiens OX=9606 GN=PPP1CC PE=1 SV=1	Serine/threonine-protein phosphatase PP1-gamma catalytic subunit	PPP1CC
sp|P47756|CAPZB_HUMAN	P47756	272	30629	1	F-actin-capping protein subunit beta OS=Homo sapiens OX=9606 GN=CAPZB PE=1 SV=5	F-actin-capping protein subunit beta	CAPZB
sp|P48443|RXRG_HUMAN	P48443	463	50871	1	Retinoic acid receptor RXR-gamma OS=Homo sapiens OX=9606 GN=RXRG PE=1 SV=1	Retinoic acid receptor RXR-gamma	RXRG
sp|P49913|CAMP_HUMAN	P49913	170	19301	1	Cathelicidin antimicrobial peptide OS=Homo sapiens OX=9606 GN=CAMP PE=1 SV=1	Cathelicidin antimicrobial peptide	CAMP
sp|P52294|IMA5_HUMAN	P52294	538	60222	1	Importin subunit alpha-5 OS=Homo sapiens OX=9606 GN=KPNA1 PE=1 SV=3	Importin subunit alpha-5	KPNA1
sp|P52895|AK1C2_HUMAN;sp|Q04828|AK1C1_HUMAN	P52895;Q04828	323	36735	1	Aldo-keto reductase family 1 member C2 OS=Homo sapiens OX=9606 GN=AKR1C2 PE=1 SV=3	Aldo-keto reductase family 1 member C2	AKR1C2
sp|P56537|IF6_HUMAN	P56537	245	26599	1	Eukaryotic translation initiation factor 6 OS=Homo sapiens OX=9606 GN=EIF6 PE=1 SV=1	Eukaryotic translation initiation factor 6	EIF6
sp|P62328|TYB4_HUMAN	P62328	44	5053	1	Thymosin beta-4 OS=Homo sapiens OX=9606 GN=TMSB4X PE=1 SV=2	Thymosin beta-4	TMSB4X
sp|Q07065|CKAP4_HUMAN	Q07065	602	66023	1	Cytoskeleton-associated protein 4 OS=Homo sapiens OX=9606 GN=CKAP4 PE=1 SV=2	Cytoskeleton-associated protein 4	CKAP4
sp|Q11206|SIA4C_HUMAN	Q11206	333	38045	1	CMP-N-acetylneuraminate-beta-galactosamide-alpha-2,3-sialyltransferase 4 OS=Homo sapiens OX=9606 GN=ST3GAL4 PE=1 SV=1	CMP-N-acetylneuraminate-beta-galactosamide-alpha-2,3-sialyltransferase 4	ST3GAL4
sp|Q13444|ADA15_HUMAN	Q13444	863	92959	1	Disintegrin and metalloproteinase domain-containing protein 15 OS=Homo sapiens OX=9606 GN=ADAM15 PE=1 SV=4	Disintegrin and metalloproteinase domain-containing protein 15	ADAM15
sp|Q13753|LAMC2_HUMAN	Q13753	1193	130976	1	Laminin subunit gamma-2 OS=Homo sapiens OX=9606 GN=LAMC2 PE=1 SV=2	Laminin subunit gamma-2	LAMC2
sp|Q14393|GAS6_HUMAN	Q14393	678	74925	1	Growth arrest-specific protein 6 OS=Homo sapiens OX=9606 GN=GAS6 PE=1 SV=3	Growth arrest-specific protein 6	GAS6
sp|Q14847|LASP1_HUMAN	Q14847	261	29717	1	LIM and SH3 domain protein 1 OS=Homo sapiens OX=9606 GN=LASP1 PE=1 SV=2	LIM and SH3 domain protein 1	LASP1
sp|Q15582|BGH3_HUMAN	Q15582	683	74681	1	Transforming growth factor-beta-induced protein ig-h3 OS=Homo sapiens OX=9606 GN=TGFBI PE=1 SV=1	Transforming growth factor-beta-induced protein ig-h3	TGFBI
sp|Q15916|ZBTB6_HUMAN	Q15916	424	48236	1	Zinc finger and BTB domain-containing protein 6 OS=Homo sapiens OX=9606 GN=ZBTB6 PE=1 SV=1	Zinc finger and BTB domain-containing protein 6	ZBTB6
sp|Q5JQC9|AKAP4_HUMAN	Q5JQC9	854	94477	1	A-kinase anchor protein 4 OS=Homo sapiens OX=9606 GN=AKAP4 PE=1 SV=1	A-kinase anchor protein 4	AKAP4
sp|Q5T0Z8|CF132_HUMAN	Q5T0Z8	1188	124034	1	Uncharacterized protein C6orf132 OS=Homo sapiens OX=9606 GN=C6orf132 PE=1 SV=4	Uncharacterized protein C6orf132	C6orf132
sp|Q5VTL7|FNDC7_HUMAN	Q5VTL7	733	78236	1	Fibronectin type III domain-containing protein 7 OS=Homo sapiens OX=9606 GN=FNDC7 PE=2 SV=3	Fibronectin type III domain-containing protein 7	FNDC7
sp|Q7Z7A1|CNTRL_HUMAN	Q7Z7A1	2325	268883	1	Centriolin OS=Homo sapiens OX=9606 GN=CNTRL PE=1 SV=2	Centriolin	CNTRL
sp|Q86Z02|HIPK1_HUMAN	Q86Z02	1210	130843	1	Homeodomain-interacting protein kinase 1 OS=Homo sapiens OX=9606 GN=HIPK1 PE=1 SV=1	Homeodomain-interacting protein kinase 1	HIPK1
sp|Q8IZ40|RCOR2_HUMAN	Q8IZ40	523	58012	1	REST corepressor 2 OS=Homo sapiens OX=9606 GN=RCOR2 PE=1 SV=2	REST corepressor 2	RCOR2
sp|Q8N1W2|ZN710_HUMAN	Q8N1W2	664	74461	1	Zinc finger protein 710 OS=Homo sapiens OX=9606 GN=ZNF710 PE=1 SV=2	Zinc finger protein 710	ZNF710
sp|Q8N4N3|KLH36_HUMAN	Q8N4N3	616	69896	1	Kelch-like protein 36 OS=Homo sapiens OX=9606 GN=KLHL36 PE=1 SV=1	Kelch-like protein 36	KLHL36
sp|Q8N9V6|ANR53_HUMAN	Q8N9V6	530	59571	1	Ankyrin repeat domain-containing protein 53 OS=Homo sapiens OX=9606 GN=ANKRD53 PE=1 SV=3	Ankyrin repeat domain-containing protein 53	ANKRD53
sp|Q8NA19|LMBL4_HUMAN	Q8NA19	623	71122	1	Lethal(3)malignant brain tumor-like protein 4 OS=Homo sapiens OX=9606 GN=L3MBTL4 PE=1 SV=2	Lethal(3)malignant brain tumor-like protein 4	L3MBTL4
sp|Q8NDA2|HMCN2_HUMAN	Q8NDA2	5059	541983	1	Hemicentin-2 OS=Homo sapiens OX=9606 GN=HMCN2 PE=2 SV=3	Hemicentin-2	HMCN2
sp|Q8NEF3|CC112_HUMAN	Q8NEF3	446	53565	1	Coiled-coil domain-containing protein 112 OS=Homo sapiens OX=9606 GN=CCDC112 PE=1 SV=2	Coiled-coil domain-containing protein 112	CCDC112
sp|Q8NEX9|DR9C7_HUMAN	Q8NEX9	313	35263	1	Short-chain dehydrogenase/reductase family 9C member 7 OS=Homo sapiens OX=9606 GN=SDR9C7 PE=1 SV=1	Short-chain dehydrogenase/reductase family 9C member 7	SDR9C7
sp|Q8NFC6|BD1L1_HUMAN	Q8NFC6	3051	330467	1	Biorientation of chromosomes in cell division protein 1-like 1 OS=Homo sapiens OX=9606 GN=BOD1L1 PE=1 SV=2	Biorientation of chromosomes in cell division protein 1-like 1	BOD1L1
sp|Q8NFU3|TSTD1_HUMAN	Q8NFU3	115	12530	1	Thiosulfate:glutathione sulfurtransferase OS=Homo sapiens OX=9606 GN=TSTD1 PE=1 SV=3	Thiosulfate:glutathione sulfurtransferase	TSTD1
sp|Q8NGG2|OR5T2_HUMAN	Q8NGG2	359	40696	1	Olfactory receptor 5T2 OS=Homo sapiens OX=9606 GN=OR5T2 PE=2 SV=3	Olfactory receptor 5T2	OR5T2
sp|Q92597|NDRG1_HUMAN	Q92597	394	42835	1	Protein NDRG1 OS=Homo sapiens OX=9606 GN=NDRG1 PE=1 SV=1	Protein NDRG1	NDRG1
sp|Q969Q6|P2R3C_HUMAN	Q969Q6	453	53316	1	Serine/threonine-protein phosphatase 2A regulatory subunit B'' subunit gamma OS=Homo sapiens OX=9606 GN=PPP2R3C PE=1 SV=1	Serine/threonine-protein phosphatase 2A regulatory subunit B'' subunit gamma	PPP2R3C
sp|Q96AE4|FUBP1_HUMAN;sp|Q96I24|FUBP3_HUMAN	Q96AE4;Q96I24	644	67560	1	Far upstream element-binding protein 1 OS=Homo sapiens OX=9606 GN=FUBP1 PE=1 SV=3	Far upstream element-binding protein 1	FUBP1
sp|Q96FT9|IFT43_HUMAN	Q96FT9	208	23529	1	Intraflagellar transport protein 43 homolog OS=Homo sapiens OX=9606 GN=IFT43 PE=1 SV=3	Intraflagellar transport protein 43 homolog	IFT43
sp|Q96IP4|TET5A_HUMAN	Q96IP4	442	49666	1	Terminal nucleotidyltransferase 5A OS=Homo sapiens OX=9606 GN=TENT5A PE=1 SV=2	Terminal nucleotidyltransferase 5A	TENT5A
sp|Q96PH6|DB118_HUMAN	Q96PH6	123	13614	1	Defensin beta 118 OS=Homo sapiens OX=9606 GN=DEFB118 PE=1 SV=1	Defensin beta 118	DEFB118
sp|Q96QA5|GSDMA_HUMAN	Q96QA5	445	49365	1	Gasdermin-A OS=Homo sapiens OX=9606 GN=GSDMA PE=1 SV=4	Gasdermin-A	GSDMA
sp|Q96QR1|SG3A1_HUMAN	Q96QR1	104	10100	1	Secretoglobin family 3A member 1 OS=Homo sapiens OX=9606 GN=SCGB3A1 PE=1 SV=2	Secretoglobin family 3A member 1	SCGB3A1
sp|Q9GZN4|BSSP4_HUMAN	Q9GZN4	317	33732	1	Brain-specific serine protease 4 OS=Homo sapiens OX=9606 GN=PRSS22 PE=1 SV=1	Brain-specific serine protease 4	PRSS22
sp|Q9H299|SH3L3_HUMAN	Q9H299	93	10438	1	SH3 domain-binding glutamic acid-rich-like protein 3 OS=Homo sapiens OX=9606 GN=SH3BGRL3 PE=1 SV=1	SH3 domain-binding glutamic acid-rich-like protein 3	SH3BGRL3
sp|Q9NP79|VTA1_HUMAN	Q9NP79	307	33879	1	Vacuolar protein sorting-associated protein VTA1 homolog OS=Homo sapiens OX=9606 GN=VTA1 PE=1 SV=1	Vacuolar protein sorting-associated protein VTA1 homolog	VTA1
sp|Q9UJ41|RABX5_HUMAN	Q9UJ41	491	56891	1	Rab5 GDP/GTP exchange factor OS=Homo sapiens OX=9606 GN=RABGEF1 PE=1 SV=3	Rab5 GDP/GTP exchange factor	RABGEF1
sp|Q9UJ90|KCNE5_HUMAN	Q9UJ90	142	14993	1	Potassium voltage-gated channel subfamily E regulatory beta subunit 5 OS=Homo sapiens OX=9606 GN=KCNE5 PE=1 SV=1	Potassium voltage-gated channel subfamily E regulatory beta subunit 5	KCNE5
sp|Q9ULI4|KI26A_HUMAN	Q9ULI4	1882	194588	1	Kinesin-like protein KIF26A OS=Homo sapiens OX=9606 GN=KIF26A PE=1 SV=3	Kinesin-like protein KIF26A	KIF26A
sp|Q9Y337|KLK5_HUMAN	Q9Y337	293	32020	1	Kallikrein-5 OS=Homo sapiens OX=9606 GN=KLK5 PE=1 SV=3	Kallikrein-5	KLK5
sp|Q9Y4K3|TRAF6_HUMAN	Q9Y4K3	522	59573	1	TNF receptor-associated factor 6 OS=Homo sapiens OX=9606 GN=TRAF6 PE=1 SV=1	TNF receptor-associated factor 6	TRAF6
sp|Q9Y5F7|PCDGL_HUMAN	Q9Y5F7	938	101214	1	Protocadherin gamma-C4 OS=Homo sapiens OX=9606 GN=PCDHGC4 PE=1 SV=1	Protocadherin gamma-C4	PCDHGC4
sp|Q9Y5G3|PCDGD_HUMAN	Q9Y5G3	927	100359	1	Protocadherin gamma-B1 OS=Homo sapiens OX=9606 GN=PCDHGB1 PE=1 SV=1	Protocadherin gamma-B1	PCDHGB1
sp|Q9Y624|JAM1_HUMAN	Q9Y624	299	32583	1	Junctional adhesion molecule A OS=Homo sapiens OX=9606 GN=F11R PE=1 SV=1	Junctional adhesion molecule A	F11R

## Sheet: 3) Data summary and bar chart
Numbers of protein identified using different peptide amounts and LC gradients
1) 200 ng peptide
repeats	LC gradients
	21 min	44 min	88 min
1st	167	220	402
2nd	166	201	411
3rd	207	190	429
Average	180	204	414
Stdev	23	15	14
2) 500 ng peptide
repeats	LC gradients
	21 min	44 min	88 min
1st	292	322	597
2nd	304	316	568
3rd	284	337	608
Average	293	325	591
Stdev	10	11	21
3,) 1000 ng peptide
repeats	LC gradients
	21 min	44 min	88 min
1st	241	277	541
2nd	238	268	528
3rd	245	276	504
Average	241	274	524
Stdev	4	5	19

## Sheet: 4) 200ng-21min#1 (167)
Protein Group Name	Protein Accession	Number Stripped Peptides	Number PSMs	Protein Coverage	Protein Length	Protein Molecular Weight	Protein Description	NSAF Score	EmPAI Score
sp|P02788|TRFL_HUMAN	P02788	181	756	88	710	78182	Lactotransferrin OS=Homo sapiens OX=9606 GN=LTF PE=1 SV=6	0.0592	6.5858
sp|P61626|LYSC_HUMAN	P61626	52	248	85.1	148	16537	Lysozyme C OS=Homo sapiens OX=9606 GN=LYZ PE=1 SV=1	0.0932	6.0958
sp|P31025|LCN1_HUMAN	P31025	54	186	78.4	176	19250	Lipocalin-1 OS=Homo sapiens OX=9606 GN=LCN1 PE=1 SV=1	0.0588	5.0814
sp|P01833|PIGR_HUMAN	P01833	81	181	58	764	83284	Polymeric immunoglobulin receptor OS=Homo sapiens OX=9606 GN=PIGR PE=1 SV=4	0.0132	2.8019
sp|P01876|IGHA1_HUMAN	P01876	38	177	62.3	398	42849	Immunoglobulin heavy constant alpha 1 OS=Homo sapiens OX=9606 GN=IGHA1 PE=1 SV=3	0.0247	3.1976
sp|P02768|ALBU_HUMAN	P02768	93	169	81.8	609	69367	Albumin OS=Homo sapiens OX=9606 GN=ALB PE=1 SV=2	0.0154	5.5766
sp|P12273|PIP_HUMAN	P12273	33	164	77.4	146	16572	Prolactin-inducible protein OS=Homo sapiens OX=9606 GN=PIP PE=1 SV=1	0.0625	4.9429
sp|P25311|ZA2G_HUMAN	P25311	44	132	64.8	298	34259	Zinc-alpha-2-glycoprotein OS=Homo sapiens OX=9606 GN=AZGP1 PE=1 SV=2	0.0246	3.4463
sp|P04264|K2C1_HUMAN	P04264	62	115	54.8	644	66039	Keratin, type II cytoskeletal 1 OS=Homo sapiens OX=9606 GN=KRT1 PE=1 SV=6	0.0099	2.5318
sp|P01834|IGKC_HUMAN	P01834	19	96	97.2	107	11765	Immunoglobulin kappa constant OS=Homo sapiens OX=9606 GN=IGKC PE=1 SV=2	0.0499	8.3756
sp|O75556|SG2A1_HUMAN	O75556	31	93	75.8	95	10884	Mammaglobin-B OS=Homo sapiens OX=9606 GN=SCGB2A1 PE=1 SV=1	0.0545	4.728
sp|Q9GZZ8|LACRT_HUMAN	Q9GZZ8	22	88	43.5	138	14246	Extracellular glycoprotein lacritin OS=Homo sapiens OX=9606 GN=LACRT PE=1 SV=1	0.0355	1.7227
sp|Q9UGM3|DMBT1_HUMAN	Q9UGM3	39	84	40	2413	260734	Deleted in malignant brain tumors 1 protein OS=Homo sapiens OX=9606 GN=DMBT1 PE=1 SV=2	0.0019	1.5119
sp|P35908|K22E_HUMAN	P35908	52	81	56.8	639	65433	Keratin, type II cytoskeletal 2 epidermal OS=Homo sapiens OX=9606 GN=KRT2 PE=1 SV=2	0.0071	2.6983
sp|P0DOX2|IGA2_HUMAN	P0DOX2	21	79	36.7	455	48934	Immunoglobulin alpha-2 heavy chain OS=Homo sapiens OX=9606 PE=1 SV=2	0.0097	1.3281
sp|P35527|K1C9_HUMAN	P35527	44	79	65.2	623	62064	Keratin, type I cytoskeletal 9 OS=Homo sapiens OX=9606 GN=KRT9 PE=1 SV=3	0.0071	3.4875
sp|P01877|IGHA2_HUMAN	P01877	17	78	31.5	391	42334	Immunoglobulin heavy constant alpha 2 OS=Homo sapiens OX=9606 GN=IGHA2 PE=1 SV=5	0.0111	1.0654
sp|P01036|CYTS_HUMAN	P01036	25	75	76.6	141	16214	Cystatin-S OS=Homo sapiens OX=9606 GN=CST4 PE=1 SV=3	0.0296	4.8345
sp|P01024|CO3_HUMAN	P01024	58	74	30.8	1663	187147	Complement C3 OS=Homo sapiens OX=9606 GN=C3 PE=1 SV=2	0.0025	1.0324
sp|P0DOX7|IGK_HUMAN	P0DOX7	18	74	65	214	23379	Immunoglobulin kappa light chain OS=Homo sapiens OX=9606 PE=1 SV=1	0.0192	3.4668
sp|Q99935|PROL1_HUMAN	Q99935	11	72	31.9	248	27216	Opiorphin prepropeptide OS=Homo sapiens OX=9606 GN=OPRPN PE=1 SV=2	0.0162	1.0845
sp|P98160|PGBM_HUMAN	P98160	52	68	15	4391	468835	Basement membrane-specific heparan sulfate proteoglycan core protein OS=Homo sapiens OX=9606 GN=HSPG2 PE=1 SV=4	0.0009	0.4125
sp|Q16378|PROL4_HUMAN	Q16378	11	67	36.6	134	15097	Proline-rich protein 4 OS=Homo sapiens OX=9606 GN=PRR4 PE=1 SV=3	0.0278	1.3227
sp|P13645|K1C10_HUMAN	P13645	40	62	58.7	584	58827	Keratin, type I cytoskeletal 10 OS=Homo sapiens OX=9606 GN=KRT10 PE=1 SV=6	0.0059	2.8637
sp|P13647|K2C5_HUMAN	P13647	44	62	48.6	590	62378	Keratin, type II cytoskeletal 5 OS=Homo sapiens OX=9606 GN=KRT5 PE=1 SV=3	0.0058	2.062
sp|P0DOY3|IGLC3_HUMAN	P0DOY3	19	59	93.4	106	11266	Immunoglobulin lambda constant 3 OS=Homo sapiens OX=9606 GN=IGLC3 PE=1 SV=1	0.031	7.5901
sp|B9A064|IGLL5_HUMAN;sp|P0DOX8|IGL1_HUMAN	B9A064;P0DOX8	14	49	50	214	23063	Immunoglobulin lambda-like polypeptide 5 OS=Homo sapiens OX=9606 GN=IGLL5 PE=1 SV=2	0.0127	2.1623
sp|P02538|K2C6A_HUMAN	P02538	38	47	49.6	564	60045	Keratin, type II cytoskeletal 6A OS=Homo sapiens OX=9606 GN=KRT6A PE=1 SV=3	0.0046	2.1333
sp|P01037|CYTN_HUMAN	P01037	14	46	61.7	141	16388	Cystatin-SN OS=Homo sapiens OX=9606 GN=CST1 PE=1 SV=3	0.0182	3.14
sp|Q13421|MSLN_HUMAN	Q13421	26	46	36	630	68986	Mesothelin OS=Homo sapiens OX=9606 GN=MSLN PE=1 SV=2	0.0041	1.2909
sp|P13646|K1C13_HUMAN	P13646	35	45	63.8	458	49588	Keratin, type I cytoskeletal 13 OS=Homo sapiens OX=9606 GN=KRT13 PE=1 SV=4	0.0055	3.3451
sp|P48668|K2C6C_HUMAN	P48668	36	45	46.6	564	60025	Keratin, type II cytoskeletal 6C OS=Homo sapiens OX=9606 GN=KRT6C PE=1 SV=3	0.0044	1.9242
sp|P01591|IGJ_HUMAN	P01591	18	44	45.9	159	18099	Immunoglobulin J chain OS=Homo sapiens OX=9606 GN=JCHAIN PE=1 SV=4	0.0154	1.8774
sp|P04259|K2C6B_HUMAN	P04259	32	43	39.7	564	60067	Keratin, type II cytoskeletal 6B OS=Homo sapiens OX=9606 GN=KRT6B PE=1 SV=5	0.0042	1.4946
sp|P02533|K1C14_HUMAN	P02533	27	40	48.5	472	51561	Keratin, type I cytoskeletal 14 OS=Homo sapiens OX=9606 GN=KRT14 PE=1 SV=4	0.0047	2.0549
sp|O95968|SG1D1_HUMAN	O95968	15	39	34.4	90	9898	Secretoglobin family 1D member 1 OS=Homo sapiens OX=9606 GN=SCGB1D1 PE=1 SV=1	0.0241	1.208
sp|P10909|CLUS_HUMAN	P10909	24	38	35.4	449	52495	Clusterin OS=Homo sapiens OX=9606 GN=CLU PE=1 SV=1	0.0047	1.2594
sp|P01871|IGHM_HUMAN	P01871	17	29	34.2	474	51924	Immunoglobulin heavy constant mu OS=Homo sapiens OX=9606 GN=IGHM PE=1 SV=5	0.0034	1.1979
sp|P22079|PERL_HUMAN	P22079	18	29	23.7	712	80288	Lactoperoxidase OS=Homo sapiens OX=9606 GN=LPO PE=1 SV=2	0.0023	0.7258
sp|Q08380|LG3BP_HUMAN	Q08380	19	29	34	585	65331	Galectin-3-binding protein OS=Homo sapiens OX=9606 GN=LGALS3BP PE=1 SV=1	0.0028	1.1878
sp|P08779|K1C16_HUMAN	P08779	18	27	26	473	51268	Keratin, type I cytoskeletal 16 OS=Homo sapiens OX=9606 GN=KRT16 PE=1 SV=4	0.0032	0.8197
sp|P14555|PA2GA_HUMAN	P14555	12	27	45.1	144	16083	Phospholipase A2, membrane associated OS=Homo sapiens OX=9606 GN=PLA2G2A PE=1 SV=2	0.0104	1.8249
sp|P12035|K2C3_HUMAN	P12035	19	24	12.9	628	64417	Keratin, type II cytoskeletal 3 OS=Homo sapiens OX=9606 GN=KRT3 PE=1 SV=3	0.0021	0.3459
sp|P19012|K1C15_HUMAN	P19012	15	24	21.7	456	49212	Keratin, type I cytoskeletal 15 OS=Homo sapiens OX=9606 GN=KRT15 PE=1 SV=3	0.0029	0.6482
sp|P60709|ACTB_HUMAN;sp|P63261|ACTG_HUMAN	P60709;P63261	16	23	36.5	375	41737	Actin, cytoplasmic 1 OS=Homo sapiens OX=9606 GN=ACTB PE=1 SV=1	0.0034	1.3174
sp|P80188|NGAL_HUMAN	P80188	14	23	60.6	198	22588	Neutrophil gelatinase-associated lipocalin OS=Homo sapiens OX=9606 GN=LCN2 PE=1 SV=2	0.0065	3.0365
sp|Q04695|K1C17_HUMAN	Q04695	15	23	19.4	432	48106	Keratin, type I cytoskeletal 17 OS=Homo sapiens OX=9606 GN=KRT17 PE=1 SV=2	0.003	0.5631
sp|P19013|K2C4_HUMAN	P19013	17	22	32.1	520	56144	Keratin, type II cytoskeletal 4 OS=Homo sapiens OX=9606 GN=KRT4 PE=1 SV=5	0.0024	1.0941
sp|P0DOX6|IGM_HUMAN	P0DOX6	14	21	22.2	576	63486	Immunoglobulin mu heavy chain OS=Homo sapiens OX=9606 PE=1 SV=2	0.002	0.6672
sp|P02787|TRFE_HUMAN	P02787	17	20	24.4	698	77050	Serotransferrin OS=Homo sapiens OX=9606 GN=TF PE=1 SV=4	0.0016	0.7539
sp|Q01546|K22O_HUMAN	Q01546	16	20	10.5	638	65841	Keratin, type II cytoskeletal 2 oral OS=Homo sapiens OX=9606 GN=KRT76 PE=1 SV=2	0.0017	0.2735
sp|Q5XKE5|K2C79_HUMAN	Q5XKE5	15	20	13.1	535	57836	Keratin, type II cytoskeletal 79 OS=Homo sapiens OX=9606 GN=KRT79 PE=1 SV=2	0.0021	0.3521
sp|P08727|K1C19_HUMAN	P08727	13	19	33.8	400	44106	Keratin, type I cytoskeletal 19 OS=Homo sapiens OX=9606 GN=KRT19 PE=1 SV=4	0.0026	1.1777
sp|Q8N474|SFRP1_HUMAN	Q8N474	13	19	38.9	314	35386	Secreted frizzled-related protein 1 OS=Homo sapiens OX=9606 GN=SFRP1 PE=1 SV=1	0.0034	1.4491
sp|P03973|SLPI_HUMAN	P03973	10	18	60.6	132	14326	Antileukoproteinase OS=Homo sapiens OX=9606 GN=SLPI PE=1 SV=2	0.0076	3.0365
sp|P0DOX5|IGG1_HUMAN	P0DOX5	13	18	34.3	449	49329	Immunoglobulin gamma-1 heavy chain OS=Homo sapiens OX=9606 PE=1 SV=2	0.0022	1.2029
sp|P61769|B2MG_HUMAN	P61769	13	18	78.2	119	13715	Beta-2-microglobulin OS=Homo sapiens OX=9606 GN=B2M PE=1 SV=1	0.0084	5.0534
sp|P00450|CERU_HUMAN	P00450	14	17	18.8	1065	122205	Ceruloplasmin OS=Homo sapiens OX=9606 GN=CP PE=1 SV=1	0.0009	0.5417
sp|P00738|HPT_HUMAN	P00738	12	17	26.4	406	45205	Haptoglobin OS=Homo sapiens OX=9606 GN=HP PE=1 SV=1	0.0023	0.8365
sp|P20061|TCO1_HUMAN	P20061	10	14	31.2	433	48207	Transcobalamin-1 OS=Homo sapiens OX=9606 GN=TCN1 PE=1 SV=2	0.0018	1.0512
sp|P01034|CYTC_HUMAN	P01034	7	13	48.6	146	15799	Cystatin-C OS=Homo sapiens OX=9606 GN=CST3 PE=1 SV=1	0.005	2.062
sp|P06396|GELS_HUMAN	P06396	10	12	18	782	85697	Gelsolin OS=Homo sapiens OX=9606 GN=GSN PE=1 SV=1	0.0009	0.5136
sp|Q86Y46|K2C73_HUMAN	Q86Y46	9	12	10.2	540	58923	Keratin, type II cytoskeletal 73 OS=Homo sapiens OX=9606 GN=KRT73 PE=1 SV=1	0.0012	0.2647
sp|A0A0B4J1Y9|HV372_HUMAN	A0A0B4J1Y9	6	11	35.3	119	13203	Immunoglobulin heavy variable 3-72 OS=Homo sapiens OX=9606 GN=IGHV3-72 PE=3 SV=1	0.0051	1.2542
sp|P01860|IGHG3_HUMAN	P01860	7	11	15.7	446	49093	Immunoglobulin heavy constant gamma 3 OS=Homo sapiens OX=9606 GN=IGHG3 PE=1 SV=3	0.0014	0.4355
sp|P02647|APOA1_HUMAN	P02647	10	11	36	267	30778	Apolipoprotein A-I OS=Homo sapiens OX=9606 GN=APOA1 PE=1 SV=1	0.0023	1.2909
sp|P04083|ANXA1_HUMAN	P04083	10	11	29.2	346	38714	Annexin A1 OS=Homo sapiens OX=9606 GN=ANXA1 PE=1 SV=2	0.0018	0.9588
sp|P01009|A1AT_HUMAN	P01009	6	10	13.4	418	46737	Alpha-1-antitrypsin OS=Homo sapiens OX=9606 GN=SERPINA1 PE=1 SV=3	0.0013	0.3614
sp|P04792|HSPB1_HUMAN	P04792	5	10	37.1	205	22783	Heat shock protein beta-1 OS=Homo sapiens OX=9606 GN=HSPB1 PE=1 SV=2	0.0027	1.3496
sp|P05787|K2C8_HUMAN;sp|P08729|K2C7_HUMAN	P05787;P08729	7	10	5.2	483	53704	Keratin, type II cytoskeletal 8 OS=Homo sapiens OX=9606 GN=KRT8 PE=1 SV=7	0.0012	0.1272
sp|P07339|CATD_HUMAN	P07339	6	10	18.4	412	44552	Cathepsin D OS=Homo sapiens OX=9606 GN=CTSD PE=1 SV=1	0.0014	0.5276
sp|P80303|NUCB2_HUMAN	P80303	9	10	19.5	420	50223	Nucleobindin-2 OS=Homo sapiens OX=9606 GN=NUCB2 PE=1 SV=3	0.0013	0.5668
sp|A0A0B4J1X5|HV374_HUMAN	A0A0B4J1X5	7	9	54.7	117	12840	Immunoglobulin heavy variable 3-74 OS=Homo sapiens OX=9606 GN=IGHV3-74 PE=3 SV=1	0.0043	2.5237
sp|P01861|IGHG4_HUMAN	P01861	6	9	17.7	396	43832	Immunoglobulin heavy constant gamma 4 OS=Homo sapiens OX=9606 GN=IGHG4 PE=1 SV=2	0.0013	0.5031
sp|Q96DA0|ZG16B_HUMAN	Q96DA0	6	9	19.7	208	22739	Zymogen granule protein 16 homolog B OS=Homo sapiens OX=9606 GN=ZG16B PE=1 SV=3	0.0024	0.574
sp|A0A075B6P5|KV228_HUMAN;sp|P01615|KVD28_HUMAN;sp|P01614|KVD40_HUMAN;sp|A0A087WW87|KV240_HUMAN	A0A075B6P5;P01615;P01614;A0A087WW87	3	8	16.7	120	12957	Immunoglobulin kappa variable 2-28 OS=Homo sapiens OX=9606 GN=IGKV2-28 PE=3 SV=1	0.0037	0.4689
sp|P01011|AACT_HUMAN	P01011	6	8	15.8	423	47651	Alpha-1-antichymotrypsin OS=Homo sapiens OX=9606 GN=SERPINA3 PE=1 SV=2	0.0011	0.4388
sp|P01780|HV307_HUMAN	P01780	6	8	35.9	117	12943	Immunoglobulin heavy variable 3-7 OS=Homo sapiens OX=9606 GN=IGHV3-7 PE=1 SV=2	0.0038	1.2856
sp|P04406|G3P_HUMAN	P04406	7	8	28.1	335	36053	Glyceraldehyde-3-phosphate dehydrogenase OS=Homo sapiens OX=9606 GN=GAPDH PE=1 SV=3	0.0013	0.9099
sp|P06312|KV401_HUMAN	P06312	4	8	29.8	121	13380	Immunoglobulin kappa variable 4-1 OS=Homo sapiens OX=9606 GN=IGKV4-1 PE=1 SV=1	0.0037	0.9861
sp|P06702|S10A9_HUMAN	P06702	5	8	35.1	114	13242	Protein S100-A9 OS=Homo sapiens OX=9606 GN=S100A9 PE=1 SV=1	0.0039	1.2439
sp|P07858|CATB_HUMAN	P07858	8	8	24.8	339	37822	Cathepsin B OS=Homo sapiens OX=9606 GN=CTSB PE=1 SV=3	0.0013	0.7701
sp|P35900|K1C20_HUMAN	P35900	6	8	7.3	424	48487	Keratin, type I cytoskeletal 20 OS=Homo sapiens OX=9606 GN=KRT20 PE=1 SV=1	0.001	0.183
sp|P49788|TIG1_HUMAN	P49788	6	8	17.7	294	33285	Retinoic acid receptor responder protein 1 OS=Homo sapiens OX=9606 GN=RARRES1 PE=1 SV=2	0.0015	0.5031
sp|A0A0C4DH42|HV366_HUMAN;sp|P0DP02|HVC33_HUMAN;sp|P01772|HV333_HUMAN;sp|P01767|HV353_HUMAN	A0A0C4DH42;P0DP02;P01772;P01767	5	7	28.4	116	12698	Immunoglobulin heavy variable 3-66 OS=Homo sapiens OX=9606 GN=IGHV3-66 PE=3 SV=1	0.0034	0.9231
sp|A6NMY6|AXA2L_HUMAN;sp|P07355|ANXA2_HUMAN	A6NMY6;P07355	6	7	21.8	339	38659	Putative annexin A2-like protein OS=Homo sapiens OX=9606 GN=ANXA2P2 PE=5 SV=2	0.0011	0.652
sp|P01859|IGHG2_HUMAN	P01859	4	7	11.6	395	43806	Immunoglobulin heavy constant gamma 2 OS=Homo sapiens OX=9606 GN=IGHG2 PE=1 SV=3	0.001	0.3062
sp|P02814|SMR3B_HUMAN	P02814	2	7	65.8	79	8188	Submaxillary gland androgen-regulated protein 3B OS=Homo sapiens OX=9606 GN=SMR3B PE=1 SV=2	0.0049	3.5499
sp|P26447|S10A4_HUMAN	P26447	5	7	45.5	101	11728	Protein S100-A4 OS=Homo sapiens OX=9606 GN=S100A4 PE=1 SV=1	0.0039	1.851
sp|P81605|DCD_HUMAN	P81605	4	7	25.5	110	11284	Dermcidin OS=Homo sapiens OX=9606 GN=DCD PE=1 SV=2	0.0035	0.7989
sp|Q15782|CH3L2_HUMAN	Q15782	4	7	12.1	390	43501	Chitinase-3-like protein 2 OS=Homo sapiens OX=9606 GN=CHI3L2 PE=1 SV=1	0.001	0.3213
sp|Q6UXB2|CXL17_HUMAN	Q6UXB2	6	7	28.6	119	13819	C-X-C motif chemokine 17 OS=Homo sapiens OX=9606 GN=CXCL17 PE=1 SV=1	0.0033	0.932
sp|P01619|KV320_HUMAN	P01619	4	6	46.6	116	12557	Immunoglobulin kappa variable 3-20 OS=Homo sapiens OX=9606 GN=IGKV3-20 PE=1 SV=2	0.0029	1.9242
sp|P01624|KV315_HUMAN	P01624	3	6	32.2	115	12496	Immunoglobulin kappa variable 3-15 OS=Homo sapiens OX=9606 GN=IGKV3-15 PE=1 SV=2	0.0029	1.0989
sp|P01764|HV323_HUMAN;sp|P0DP03|HVC05_HUMAN;sp|P01768|HV330_HUMAN	P01764;P0DP03;P01768	5	6	28.2	117	12582	Immunoglobulin heavy variable 3-23 OS=Homo sapiens OX=9606 GN=IGHV3-23 PE=1 SV=2	0.0029	0.9143
sp|P02763|A1AG1_HUMAN	P02763	5	6	16.9	201	23540	Alpha-1-acid glycoprotein 1 OS=Homo sapiens OX=9606 GN=ORM1 PE=1 SV=2	0.0017	0.4757
sp|P34096|RNAS4_HUMAN	P34096	6	6	29.3	147	16840	Ribonuclease 4 OS=Homo sapiens OX=9606 GN=RNASE4 PE=1 SV=3	0.0023	0.9634
sp|A0A075B6R9|KVD24_HUMAN;sp|A0A0C4DH68|KV224_HUMAN	A0A075B6R9;A0A0C4DH68	4	5	38.3	120	13079	Probable non-functional immunoglobulin kappa variable 2D-24 OS=Homo sapiens OX=9606 GN=IGKV2D-24 PE=1 SV=1	0.0023	1.4155
sp|A0A0A0MS15|HV349_HUMAN	A0A0A0MS15	4	5	21	119	13056	Immunoglobulin heavy variable 3-49 OS=Homo sapiens OX=9606 GN=IGHV3-49 PE=3 SV=1	0.0023	0.6218
sp|P10599|THIO_HUMAN	P10599	3	5	46.7	105	11737	Thioredoxin OS=Homo sapiens OX=9606 GN=TXN PE=1 SV=3	0.0026	1.9309
sp|P55058|PLTP_HUMAN	P55058	5	5	10.5	493	54739	Phospholipid transfer protein OS=Homo sapiens OX=9606 GN=PLTP PE=1 SV=1	0.0006	0.2735
sp|Q96S96|PEBP4_HUMAN	Q96S96	4	5	14.1	227	25733	Phosphatidylethanolamine-binding protein 4 OS=Homo sapiens OX=9606 GN=PEBP4 PE=1 SV=3	0.0012	0.3836
sp|A0A075B6S2|KVD29_HUMAN;sp|A2NJV5|KV229_HUMAN;sp|A0A0A0MRZ7|KVD26_HUMAN	A0A075B6S2;A2NJV5;A0A0A0MRZ7	3	4	16.7	120	13143	Immunoglobulin kappa variable 2D-29 OS=Homo sapiens OX=9606 GN=IGKV2D-29 PE=3 SV=1	0.0019	0.4689
sp|A0A087WSY6|KVD15_HUMAN	A0A087WSY6	3	4	32.2	115	12534	Immunoglobulin kappa variable 3D-15 OS=Homo sapiens OX=9606 GN=IGKV3D-15 PE=3 SV=6	0.0019	1.0989
sp|A0A0C4DH25|KVD20_HUMAN	A0A0C4DH25	3	4	27.6	116	12515	Immunoglobulin kappa variable 3D-20 OS=Homo sapiens OX=9606 GN=IGKV3D-20 PE=3 SV=1	0.0019	0.888
sp|A0A0C4DH72|KV106_HUMAN	A0A0C4DH72	3	4	29.1	117	12697	Immunoglobulin kappa variable 1-6 OS=Homo sapiens OX=9606 GN=IGKV1-6 PE=3 SV=1	0.0019	0.9543
sp|P01033|TIMP1_HUMAN	P01033	3	4	24.2	207	23171	Metalloproteinase inhibitor 1 OS=Homo sapiens OX=9606 GN=TIMP1 PE=1 SV=1	0.0011	0.7458
sp|P05089|ARGI1_HUMAN	P05089	1	4	4.3	322	34735	Arginase-1 OS=Homo sapiens OX=9606 GN=ARG1 PE=1 SV=2	0.0007	0.1041
sp|P07602|SAP_HUMAN	P07602	4	4	9.9	524	58113	Prosaposin OS=Homo sapiens OX=9606 GN=PSAP PE=1 SV=2	0.0004	0.256
sp|P13987|CD59_HUMAN	P13987	3	4	25	128	14177	CD59 glycoprotein OS=Homo sapiens OX=9606 GN=CD59 PE=1 SV=1	0.0017	0.7783
sp|P15311|EZRI_HUMAN;sp|P35241|RADI_HUMAN;sp|P26038|MOES_HUMAN	P15311;P35241;P26038	2	4	2.7	586	69413	Ezrin OS=Homo sapiens OX=9606 GN=EZR PE=1 SV=4	0.0004	0.0641
sp|P22352|GPX3_HUMAN	P22352	3	4	16.4	226	25402	Glutathione peroxidase 3 OS=Homo sapiens OX=9606 GN=GPX3 PE=1 SV=2	0.001	0.4588
sp|P30740|ILEU_HUMAN	P30740	3	4	9.5	379	42742	Leukocyte elastase inhibitor OS=Homo sapiens OX=9606 GN=SERPINB1 PE=1 SV=1	0.0006	0.2445
sp|P59665|DEF1_HUMAN;sp|P59666|DEF3_HUMAN	P59665;P59666	4	4	20.2	94	10201	Neutrophil defensin 1 OS=Homo sapiens OX=9606 GN=DEFA1 PE=1 SV=1	0.0024	0.5922
sp|A0A075B6R2|HV404_HUMAN;sp|P0DP08|HVD82_HUMAN;sp|P0DP07|HV431_HUMAN;sp|P0DP06|HVD34_HUMAN;sp|P06331|HV434_HUMAN;sp|P01825|HV459_HUMAN;sp|P01824|HV439_HUMAN;sp|A0A0C4DH41|HV461_HUMAN;sp|A0A087WSY4|HV432_HUMAN	A0A075B6R2;P0DP08;P0DP07;P0DP06;P06331;P01825;P01824;A0A0C4DH41;A0A087WSY4	2	3	18.8	117	12848	Immunoglobulin heavy variable 4-4 OS=Homo sapiens OX=9606 GN=IGHV4-4 PE=3 SV=2	0.0014	0.5417
sp|A0A075B6S5|KV127_HUMAN;sp|A0A0C4DH69|KV109_HUMAN;sp|A0A0C4DH67|KV108_HUMAN	A0A075B6S5;A0A0C4DH69;A0A0C4DH67	2	3	18.8	117	12711	Immunoglobulin kappa variable 1-27 OS=Homo sapiens OX=9606 GN=IGKV1-27 PE=3 SV=1	0.0014	0.5417
sp|O60814|H2B1K_HUMAN;sp|Q99880|H2B1L_HUMAN;sp|Q99879|H2B1M_HUMAN;sp|Q99877|H2B1N_HUMAN;sp|Q93079|H2B1H_HUMAN;sp|Q8N257|H2B3B_HUMAN;sp|Q5QNW6|H2B2F_HUMAN;sp|Q16778|H2B2E_HUMAN;sp|P62807|H2B1C_HUMAN;sp|P58876|H2B1D_HUMAN;sp|P57053|H2BFS_HUMAN;sp|P33778|H2B1B_HUMAN;sp|P23527|H2B1O_HUMAN;sp|P06899|H2B1J_HUMAN	O60814;Q99880;Q99879;Q99877;Q93079;Q8N257;Q5QNW6;Q16778;P62807;P58876;P57053;P33778;P23527;P06899	2	3	19	126	13890	Histone H2B type 1-K OS=Homo sapiens OX=9606 GN=H2BC12 PE=1 SV=3	0.0013	0.5488
sp|P01593|KVD33_HUMAN;sp|P01594|KV133_HUMAN	P01593;P01594	1	3	13.7	117	12848	Immunoglobulin kappa variable 1D-33 OS=Homo sapiens OX=9606 GN=IGKV1D-33 PE=1 SV=2	0.0014	0.3709
sp|P04908|H2A1B_HUMAN;sp|Q9BTM1|H2AJ_HUMAN;sp|Q99878|H2A1J_HUMAN;sp|Q96QV6|H2A1A_HUMAN;sp|Q96KK5|H2A1H_HUMAN;sp|Q93077|H2A1C_HUMAN;sp|Q8IUE6|H2A2B_HUMAN;sp|Q7L7L0|H2A3_HUMAN;sp|Q71UI9|H2AV_HUMAN;sp|Q6FI13|H2A2A_HUMAN;sp|Q16777|H2A2C_HUMAN;sp|P20671|H2A1D_HUMAN;sp|P16104|H2AX_HUMAN;sp|P0C0S8|H2A1_HUMAN;sp|P0C0S5|H2AZ_HUMAN	P04908;Q9BTM1;Q99878;Q96QV6;Q96KK5;Q93077;Q8IUE6;Q7L7L0;Q71UI9;Q6FI13;Q16777;P20671;P16104;P0C0S8;P0C0S5	1	3	6.9	130	14135	Histone H2A type 1-B/E OS=Homo sapiens OX=9606 GN=H2AC4 PE=1 SV=2	0.0013	0.1722
sp|P05109|S10A8_HUMAN	P05109	3	3	31.2	93	10834	Protein S100-A8 OS=Homo sapiens OX=9606 GN=S100A8 PE=1 SV=1	0.0018	1.0512
sp|P06310|KV230_HUMAN	P06310	2	3	16.7	120	13185	Immunoglobulin kappa variable 2-30 OS=Homo sapiens OX=9606 GN=IGKV2-30 PE=3 SV=2	0.0014	0.4689
sp|P62805|H4_HUMAN	P62805	3	3	41.7	103	11367	Histone H4 OS=Homo sapiens OX=9606 GN=H4C1 PE=1 SV=2	0.0016	1.6122
sp|Q14697|GANAB_HUMAN	Q14697	3	3	5.2	944	106874	Neutral alpha-glucosidase AB OS=Homo sapiens OX=9606 GN=GANAB PE=1 SV=3	0.0002	0.1272
sp|Q6MZM9|PRR27_HUMAN	Q6MZM9	2	3	11.9	219	22720	Proline-rich protein 27 OS=Homo sapiens OX=9606 GN=PRR27 PE=2 SV=1	0.0008	0.3152
sp|Q8N1N4|K2C78_HUMAN	Q8N1N4	3	3	5.8	520	56866	Keratin, type II cytoskeletal 78 OS=Homo sapiens OX=9606 GN=KRT78 PE=1 SV=2	0.0003	0.1429
sp|A0A0C4DH36|HV338_HUMAN	A0A0C4DH36	2	2	15.5	116	12759	Probable non-functional immunoglobulin heavy variable 3-38 OS=Homo sapiens OX=9606 GN=IGHV3-38 PE=1 SV=1	0.001	0.4289
sp|O00584|RNT2_HUMAN	O00584	2	2	9.4	256	29481	Ribonuclease T2 OS=Homo sapiens OX=9606 GN=RNASET2 PE=1 SV=2	0.0004	0.2417
sp|P01601|KVD16_HUMAN	P01601	2	2	18.8	117	12730	Immunoglobulin kappa variable 1D-16 OS=Homo sapiens OX=9606 GN=IGKV1D-16 PE=3 SV=2	0.001	0.5417
sp|P04075|ALDOA_HUMAN	P04075	1	2	5.5	364	39420	Fructose-bisphosphate aldolase A OS=Homo sapiens OX=9606 GN=ALDOA PE=1 SV=2	0.0003	0.135
sp|P06733|ENOA_HUMAN	P06733	2	2	5.8	434	47169	Alpha-enolase OS=Homo sapiens OX=9606 GN=ENO1 PE=1 SV=2	0.0003	0.1429
sp|P09211|GSTP1_HUMAN	P09211	2	2	14.3	210	23356	Glutathione S-transferase P OS=Homo sapiens OX=9606 GN=GSTP1 PE=1 SV=2	0.0005	0.39
sp|P14314|GLU2B_HUMAN	P14314	2	2	4	528	59425	Glucosidase 2 subunit beta OS=Homo sapiens OX=9606 GN=PRKCSH PE=1 SV=2	0.0002	0.0965
sp|P31749|AKT1_HUMAN;sp|Q9Y243|AKT3_HUMAN;sp|P31751|AKT2_HUMAN	P31749;Q9Y243;P31751	1	2	3.3	480	55686	RAC-alpha serine/threonine-protein kinase OS=Homo sapiens OX=9606 GN=AKT1 PE=1 SV=2	0.0002	0.0789
sp|P68104|EF1A1_HUMAN;sp|Q5VTE0|EF1A3_HUMAN	P68104;Q5VTE0	2	2	7.6	462	50141	Elongation factor 1-alpha 1 OS=Homo sapiens OX=9606 GN=EEF1A1 PE=1 SV=1	0.0002	0.1912
sp|Q01469|FABP5_HUMAN	Q01469	2	2	23	135	15164	Fatty acid-binding protein 5 OS=Homo sapiens OX=9606 GN=FABP5 PE=1 SV=3	0.0008	0.6982
sp|Q06830|PRDX1_HUMAN	Q06830	2	2	11.6	199	22110	Peroxiredoxin-1 OS=Homo sapiens OX=9606 GN=PRDX1 PE=1 SV=1	0.0006	0.3062
sp|Q13162|PRDX4_HUMAN	Q13162	2	2	8.5	271	30540	Peroxiredoxin-4 OS=Homo sapiens OX=9606 GN=PRDX4 PE=1 SV=1	0.0004	0.2162
sp|Q14515|SPRL1_HUMAN	Q14515	2	2	3.8	664	75208	SPARC-like protein 1 OS=Homo sapiens OX=9606 GN=SPARCL1 PE=1 SV=2	0.0002	0.0914
sp|Q6UXB3|LYPD2_HUMAN	Q6UXB3	1	2	11.2	125	13115	Ly6/PLAUR domain-containing protein 2 OS=Homo sapiens OX=9606 GN=LYPD2 PE=1 SV=1	0.0009	0.2942
sp|Q7Z333|SETX_HUMAN	Q7Z333	1	2	0.3	2677	302879	Probable helicase senataxin OS=Homo sapiens OX=9606 GN=SETX PE=1 SV=4	0	0.0069
sp|Q96BQ1|FAM3D_HUMAN	Q96BQ1	1	2	8	224	24963	Protein FAM3D OS=Homo sapiens OX=9606 GN=FAM3D PE=1 SV=1	0.0005	0.2023
sp|A0A0B4J2H0|HV69D_HUMAN;sp|P0DP01|HV108_HUMAN;sp|P01743|HV146_HUMAN;sp|P01742|HV169_HUMAN;sp|A0A0C4DH29|HV103_HUMAN	A0A0B4J2H0;P0DP01;P01743;P01742;A0A0C4DH29	1	1	9.4	117	12660	Immunoglobulin heavy variable 1-69D OS=Homo sapiens OX=9606 GN=IGHV1-69D PE=1 SV=1	0.0005	0.2417
sp|O00391|QSOX1_HUMAN	O00391	1	1	2.3	747	82578	Sulfhydryl oxidase 1 OS=Homo sapiens OX=9606 GN=QSOX1 PE=1 SV=3	0.0001	0.0544
sp|O43653|PSCA_HUMAN	O43653	1	1	8.8	114	11959	Prostate stem cell antigen OS=Homo sapiens OX=9606 GN=PSCA PE=1 SV=2	0.0005	0.2246
sp|P01700|LV147_HUMAN	P01700	1	1	11.1	117	12284	Immunoglobulin lambda variable 1-47 OS=Homo sapiens OX=9606 GN=IGLV1-47 PE=1 SV=2	0.0005	0.2912
sp|P02652|APOA2_HUMAN	P02652	1	1	10	100	11175	Apolipoprotein A-II OS=Homo sapiens OX=9606 GN=APOA2 PE=1 SV=1	0.0006	0.2589
sp|P02790|HEMO_HUMAN	P02790	1	1	1.7	462	51676	Hemopexin OS=Homo sapiens OX=9606 GN=HPX PE=1 SV=2	0.0001	0.0399
sp|P04746|AMYP_HUMAN;sp|P19961|AMY2B_HUMAN;sp|P0DUB6|AMY1A_HUMAN;sp|P0DTE8|AMY1C_HUMAN;sp|P0DTE7|AMY1B_HUMAN	P04746;P19961;P0DUB6;P0DTE8;P0DTE7	1	1	2.9	511	57707	Pancreatic alpha-amylase OS=Homo sapiens OX=9606 GN=AMY2A PE=1 SV=2	0.0001	0.0691
sp|P05090|APOD_HUMAN	P05090	1	1	5.8	189	21276	Apolipoprotein D OS=Homo sapiens OX=9606 GN=APOD PE=1 SV=1	0.0003	0.1429
sp|P08311|CATG_HUMAN	P08311	1	1	3.5	255	28837	Cathepsin G OS=Homo sapiens OX=9606 GN=CTSG PE=1 SV=2	0.0002	0.0839
sp|P08571|CD14_HUMAN	P08571	1	1	4.8	375	40076	Monocyte differentiation antigen CD14 OS=Homo sapiens OX=9606 GN=CD14 PE=1 SV=2	0.0001	0.1169
sp|P0DMV8|HS71A_HUMAN;sp|P17066|HSP76_HUMAN;sp|P0DMV9|HS71B_HUMAN	P0DMV8;P17066;P0DMV9	1	1	2.5	641	70052	Heat shock 70 kDa protein 1A OS=Homo sapiens OX=9606 GN=HSPA1A PE=1 SV=1	0.0001	0.0593
sp|P19113|DCHS_HUMAN	P19113	1	1	1.7	662	74141	Histidine decarboxylase OS=Homo sapiens OX=9606 GN=HDC PE=1 SV=2	0.0001	0.0399
sp|P21926|CD9_HUMAN	P21926	1	1	4.4	228	25416	CD9 antigen OS=Homo sapiens OX=9606 GN=CD9 PE=1 SV=4	0.0002	0.1066
sp|P31944|CASPE_HUMAN	P31944	1	1	7	242	27680	Caspase-14 OS=Homo sapiens OX=9606 GN=CASP14 PE=1 SV=2	0.0002	0.1749
sp|P32298|GRK4_HUMAN;sp|P43250|GRK6_HUMAN;sp|P34947|GRK5_HUMAN	P32298;P43250;P34947	1	1	2.1	578	66583	G protein-coupled receptor kinase 4 OS=Homo sapiens OX=9606 GN=GRK4 PE=1 SV=3	0.0001	0.0495
sp|P98088|MUC5A_HUMAN	P98088	1	1	0.8	5654	585574	Mucin-5AC OS=Homo sapiens OX=9606 GN=MUC5AC PE=1 SV=4	0	0.0186
sp|Q14508|WFDC2_HUMAN	Q14508	1	1	11.3	124	12993	WAP four-disulfide core domain protein 2 OS=Homo sapiens OX=9606 GN=WFDC2 PE=1 SV=2	0.0004	0.2972
sp|Q16651|PRSS8_HUMAN	Q16651	1	1	4.1	343	36431	Prostasin OS=Homo sapiens OX=9606 GN=PRSS8 PE=1 SV=1	0.0002	0.099
sp|Q5D862|FILA2_HUMAN	Q5D862	1	1	0.5	2391	248072	Filaggrin-2 OS=Homo sapiens OX=9606 GN=FLG2 PE=1 SV=1	0	0.0116
sp|Q8NEF3|CC112_HUMAN	Q8NEF3	1	1	1.8	446	53565	Coiled-coil domain-containing protein 112 OS=Homo sapiens OX=9606 GN=CCDC112 PE=1 SV=2	0.0001	0.0423
sp|Q8WXG9|AGRV1_HUMAN	Q8WXG9	1	1	0.1	6306	693082	Adhesion G-protein coupled receptor V1 OS=Homo sapiens OX=9606 GN=ADGRV1 PE=1 SV=2	0	0.0023
sp|Q92743|HTRA1_HUMAN	Q92743	1	1	2.3	480	51287	Serine protease HTRA1 OS=Homo sapiens OX=9606 GN=HTRA1 PE=1 SV=1	0.0001	0.0544
sp|Q96DR8|MUCL1_HUMAN	Q96DR8	1	1	10	90	9039	Mucin-like protein 1 OS=Homo sapiens OX=9606 GN=MUCL1 PE=1 SV=1	0.0006	0.2589
sp|Q96GS6|AB17A_HUMAN	Q96GS6	1	1	2.3	310	33990	Alpha/beta hydrolase domain-containing protein 17A OS=Homo sapiens OX=9606 GN=ABHD17A PE=1 SV=1	0.0002	0.0544
sp|Q9NRJ3|CCL28_HUMAN	Q9NRJ3	1	1	11.8	127	14280	C-C motif chemokine 28 OS=Homo sapiens OX=9606 GN=CCL28 PE=1 SV=1	0.0004	0.3122
sp|Q9UBC9|SPRR3_HUMAN	Q9UBC9	1	1	8.9	169	18154	Small proline-rich protein 3 OS=Homo sapiens OX=9606 GN=SPRR3 PE=1 SV=2	0.0003	0.2274

## Sheet: 5) 200ng-21min#2 (166)
Protein Group Name	Protein Accession	Number Stripped Peptides	Number PSMs	Protein Coverage	Protein Length	Protein Molecular Weight	Protein Description	NSAF Score	EmPAI Score
sp|P02788|TRFL_HUMAN	P02788	188	747	89	710	78182	Lactotransferrin OS=Homo sapiens OX=9606 GN=LTF PE=1 SV=6	0.0599	6.7625
sp|P61626|LYSC_HUMAN	P61626	52	240	85.1	148	16537	Lysozyme C OS=Homo sapiens OX=9606 GN=LYZ PE=1 SV=1	0.0924	6.0958
sp|P31025|LCN1_HUMAN	P31025	56	187	78.4	176	19250	Lipocalin-1 OS=Homo sapiens OX=9606 GN=LCN1 PE=1 SV=1	0.0605	5.0814
sp|P01833|PIGR_HUMAN	P01833	82	185	59.4	764	83284	Polymeric immunoglobulin receptor OS=Homo sapiens OX=9606 GN=PIGR PE=1 SV=4	0.0138	2.9264
sp|P01876|IGHA1_HUMAN	P01876	39	177	62.3	398	42849	Immunoglobulin heavy constant alpha 1 OS=Homo sapiens OX=9606 GN=IGHA1 PE=1 SV=3	0.0253	3.1976
sp|P02768|ALBU_HUMAN	P02768	88	167	83.9	609	69367	Albumin OS=Homo sapiens OX=9606 GN=ALB PE=1 SV=2	0.0156	5.9024
sp|P12273|PIP_HUMAN	P12273	32	155	77.4	146	16572	Prolactin-inducible protein OS=Homo sapiens OX=9606 GN=PIP PE=1 SV=1	0.0605	4.9429
sp|P25311|ZA2G_HUMAN	P25311	43	137	61.7	298	34259	Zinc-alpha-2-glycoprotein OS=Homo sapiens OX=9606 GN=AZGP1 PE=1 SV=2	0.0262	3.14
sp|P04264|K2C1_HUMAN	P04264	60	107	56.2	644	66039	Keratin, type II cytoskeletal 1 OS=Homo sapiens OX=9606 GN=KRT1 PE=1 SV=6	0.0095	2.6475
sp|Q9GZZ8|LACRT_HUMAN	Q9GZZ8	24	94	43.5	138	14246	Extracellular glycoprotein lacritin OS=Homo sapiens OX=9606 GN=LACRT PE=1 SV=1	0.0388	1.7227
sp|P01834|IGKC_HUMAN	P01834	20	93	97.2	107	11765	Immunoglobulin kappa constant OS=Homo sapiens OX=9606 GN=IGKC PE=1 SV=2	0.0495	8.3756
sp|O75556|SG2A1_HUMAN	O75556	29	92	73.7	95	10884	Mammaglobin-B OS=Homo sapiens OX=9606 GN=SCGB2A1 PE=1 SV=1	0.0552	4.4576
sp|P0DOX2|IGA2_HUMAN	P0DOX2	22	90	46.2	455	48934	Immunoglobulin alpha-2 heavy chain OS=Homo sapiens OX=9606 PE=1 SV=2	0.0113	1.8973
sp|P01877|IGHA2_HUMAN	P01877	18	89	40.4	391	42334	Immunoglobulin heavy constant alpha 2 OS=Homo sapiens OX=9606 GN=IGHA2 PE=1 SV=5	0.013	1.5351
sp|Q9UGM3|DMBT1_HUMAN	Q9UGM3	40	88	40	2413	260734	Deleted in malignant brain tumors 1 protein OS=Homo sapiens OX=9606 GN=DMBT1 PE=1 SV=2	0.0021	1.5119
sp|P01024|CO3_HUMAN	P01024	56	81	31.6	1663	187147	Complement C3 OS=Homo sapiens OX=9606 GN=C3 PE=1 SV=2	0.0028	1.0701
sp|P35527|K1C9_HUMAN	P35527	41	81	57.6	623	62064	Keratin, type I cytoskeletal 9 OS=Homo sapiens OX=9606 GN=KRT9 PE=1 SV=3	0.0074	2.767
sp|Q16378|PROL4_HUMAN	Q16378	13	79	37.3	134	15097	Proline-rich protein 4 OS=Homo sapiens OX=9606 GN=PRR4 PE=1 SV=3	0.0336	1.3605
sp|P35908|K22E_HUMAN	P35908	47	77	56.8	639	65433	Keratin, type II cytoskeletal 2 epidermal OS=Homo sapiens OX=9606 GN=KRT2 PE=1 SV=2	0.0069	2.6983
sp|P01036|CYTS_HUMAN	P01036	23	76	76.6	141	16214	Cystatin-S OS=Homo sapiens OX=9606 GN=CST4 PE=1 SV=3	0.0307	4.8345
sp|P0DOX7|IGK_HUMAN	P0DOX7	19	71	65	214	23379	Immunoglobulin kappa light chain OS=Homo sapiens OX=9606 PE=1 SV=1	0.0189	3.4668
sp|P13645|K1C10_HUMAN	P13645	43	71	58.7	584	58827	Keratin, type I cytoskeletal 10 OS=Homo sapiens OX=9606 GN=KRT10 PE=1 SV=6	0.0069	2.8637
sp|Q99935|PROL1_HUMAN	Q99935	11	66	31.9	248	27216	Opiorphin prepropeptide OS=Homo sapiens OX=9606 GN=OPRPN PE=1 SV=2	0.0152	1.0845
sp|P13647|K2C5_HUMAN	P13647	44	64	49.8	590	62378	Keratin, type II cytoskeletal 5 OS=Homo sapiens OX=9606 GN=KRT5 PE=1 SV=3	0.0062	2.1477
sp|P98160|PGBM_HUMAN	P98160	47	57	13.9	4391	468835	Basement membrane-specific heparan sulfate proteoglycan core protein OS=Homo sapiens OX=9606 GN=HSPG2 PE=1 SV=4	0.0007	0.3772
sp|P0DOY3|IGLC3_HUMAN	P0DOY3	20	55	93.4	106	11266	Immunoglobulin lambda constant 3 OS=Homo sapiens OX=9606 GN=IGLC3 PE=1 SV=1	0.0296	7.5901
sp|P0DOX8|IGL1_HUMAN	P0DOX8	15	50	55.6	216	22830	Immunoglobulin lambda-1 light chain OS=Homo sapiens OX=9606 PE=1 SV=1	0.0132	2.5975
sp|P01037|CYTN_HUMAN	P01037	15	48	61.7	141	16388	Cystatin-SN OS=Homo sapiens OX=9606 GN=CST1 PE=1 SV=3	0.0194	3.14
sp|P02538|K2C6A_HUMAN	P02538	32	48	47	564	60045	Keratin, type II cytoskeletal 6A OS=Homo sapiens OX=9606 GN=KRT6A PE=1 SV=3	0.0048	1.9512
sp|P48668|K2C6C_HUMAN	P48668	31	46	45.2	564	60025	Keratin, type II cytoskeletal 6C OS=Homo sapiens OX=9606 GN=KRT6C PE=1 SV=3	0.0046	1.8314
sp|P02533|K1C14_HUMAN	P02533	29	42	50	472	51561	Keratin, type I cytoskeletal 14 OS=Homo sapiens OX=9606 GN=KRT14 PE=1 SV=4	0.0051	2.1623
sp|P01591|IGJ_HUMAN	P01591	20	41	67.9	159	18099	Immunoglobulin J chain OS=Homo sapiens OX=9606 GN=JCHAIN PE=1 SV=4	0.0147	3.7753
sp|P13646|K1C13_HUMAN	P13646	30	41	57	458	49588	Keratin, type I cytoskeletal 13 OS=Homo sapiens OX=9606 GN=KRT13 PE=1 SV=4	0.0051	2.7154
sp|P04259|K2C6B_HUMAN	P04259	28	40	40.4	564	60067	Keratin, type II cytoskeletal 6B OS=Homo sapiens OX=9606 GN=KRT6B PE=1 SV=5	0.004	1.5351
sp|Q13421|MSLN_HUMAN	Q13421	25	40	34.4	630	68986	Mesothelin OS=Homo sapiens OX=9606 GN=MSLN PE=1 SV=2	0.0036	1.208
sp|O95968|SG1D1_HUMAN	O95968	15	38	38.9	90	9898	Secretoglobin family 1D member 1 OS=Homo sapiens OX=9606 GN=SCGB1D1 PE=1 SV=1	0.0241	1.4491
sp|P10909|CLUS_HUMAN	P10909	21	35	32.7	449	52495	Clusterin OS=Homo sapiens OX=9606 GN=CLU PE=1 SV=1	0.0044	1.1232
sp|P22079|PERL_HUMAN	P22079	20	30	25.3	712	80288	Lactoperoxidase OS=Homo sapiens OX=9606 GN=LPO PE=1 SV=2	0.0024	0.7906
sp|Q08380|LG3BP_HUMAN	Q08380	22	30	35.7	585	65331	Galectin-3-binding protein OS=Homo sapiens OX=9606 GN=LGALS3BP PE=1 SV=1	0.0029	1.2751
sp|P01871|IGHM_HUMAN	P01871	17	28	35	474	51924	Immunoglobulin heavy constant mu OS=Homo sapiens OX=9606 GN=IGHM PE=1 SV=5	0.0034	1.2387
sp|P60709|ACTB_HUMAN;sp|P63261|ACTG_HUMAN	P60709;P63261	14	27	36.5	375	41737	Actin, cytoplasmic 1 OS=Homo sapiens OX=9606 GN=ACTB PE=1 SV=1	0.0041	1.3174
sp|P19012|K1C15_HUMAN	P19012	15	24	21.7	456	49212	Keratin, type I cytoskeletal 15 OS=Homo sapiens OX=9606 GN=KRT15 PE=1 SV=3	0.003	0.6482
sp|P14555|PA2GA_HUMAN	P14555	11	23	43.1	144	16083	Phospholipase A2, membrane associated OS=Homo sapiens OX=9606 GN=PLA2G2A PE=1 SV=2	0.0091	1.6977
sp|P12035|K2C3_HUMAN	P12035	16	22	11.8	628	64417	Keratin, type II cytoskeletal 3 OS=Homo sapiens OX=9606 GN=KRT3 PE=1 SV=3	0.002	0.3122
sp|P0DOX6|IGM_HUMAN	P0DOX6	14	21	22.9	576	63486	Immunoglobulin mu heavy chain OS=Homo sapiens OX=9606 PE=1 SV=2	0.0021	0.6943
sp|P03973|SLPI_HUMAN	P03973	10	20	65.9	132	14326	Antileukoproteinase OS=Homo sapiens OX=9606 GN=SLPI PE=1 SV=2	0.0086	3.5604
sp|Q5XKE5|K2C79_HUMAN	Q5XKE5	13	20	13.1	535	57836	Keratin, type II cytoskeletal 79 OS=Homo sapiens OX=9606 GN=KRT79 PE=1 SV=2	0.0021	0.3521
sp|O95678|K2C75_HUMAN	O95678	13	19	17.2	551	59560	Keratin, type II cytoskeletal 75 OS=Homo sapiens OX=9606 GN=KRT75 PE=1 SV=2	0.002	0.4859
sp|P19013|K2C4_HUMAN	P19013	14	19	25.4	520	56144	Keratin, type II cytoskeletal 4 OS=Homo sapiens OX=9606 GN=KRT4 PE=1 SV=5	0.0021	0.7947
sp|Q01546|K22O_HUMAN	Q01546	13	19	10.5	638	65841	Keratin, type II cytoskeletal 2 oral OS=Homo sapiens OX=9606 GN=KRT76 PE=1 SV=2	0.0017	0.2735
sp|P02787|TRFE_HUMAN	P02787	15	18	26.9	698	77050	Serotransferrin OS=Homo sapiens OX=9606 GN=TF PE=1 SV=4	0.0015	0.8578
sp|P80188|NGAL_HUMAN	P80188	12	18	63.6	198	22588	Neutrophil gelatinase-associated lipocalin OS=Homo sapiens OX=9606 GN=LCN2 PE=1 SV=2	0.0052	3.3251
sp|P01034|CYTC_HUMAN	P01034	7	17	44.5	146	15799	Cystatin-C OS=Homo sapiens OX=9606 GN=CST3 PE=1 SV=1	0.0066	1.7861
sp|P06396|GELS_HUMAN	P06396	12	17	24	782	85697	Gelsolin OS=Homo sapiens OX=9606 GN=GSN PE=1 SV=1	0.0012	0.7378
sp|P08727|K1C19_HUMAN	P08727	10	17	20	400	44106	Keratin, type I cytoskeletal 19 OS=Homo sapiens OX=9606 GN=KRT19 PE=1 SV=4	0.0024	0.5849
sp|P61769|B2MG_HUMAN	P61769	12	17	78.2	119	13715	Beta-2-microglobulin OS=Homo sapiens OX=9606 GN=B2M PE=1 SV=1	0.0081	5.0534
sp|Q8N474|SFRP1_HUMAN	Q8N474	11	17	23.2	314	35386	Secreted frizzled-related protein 1 OS=Homo sapiens OX=9606 GN=SFRP1 PE=1 SV=1	0.0031	0.7061
sp|P00450|CERU_HUMAN	P00450	12	15	19.1	1065	122205	Ceruloplasmin OS=Homo sapiens OX=9606 GN=CP PE=1 SV=1	0.0008	0.5524
sp|P0DOX5|IGG1_HUMAN	P0DOX5	11	15	25.2	449	49329	Immunoglobulin gamma-1 heavy chain OS=Homo sapiens OX=9606 PE=1 SV=2	0.0019	0.7865
sp|P00738|HPT_HUMAN	P00738	11	14	27.8	406	45205	Haptoglobin OS=Homo sapiens OX=9606 GN=HP PE=1 SV=1	0.002	0.8967
sp|Q86Y46|K2C73_HUMAN	Q86Y46	8	13	9.4	540	58923	Keratin, type II cytoskeletal 73 OS=Homo sapiens OX=9606 GN=KRT73 PE=1 SV=1	0.0014	0.2417
sp|P07858|CATB_HUMAN	P07858	9	12	23	339	37822	Cathepsin B OS=Homo sapiens OX=9606 GN=CTSB PE=1 SV=3	0.002	0.6982
sp|P01011|AACT_HUMAN	P01011	7	11	19.4	423	47651	Alpha-1-antichymotrypsin OS=Homo sapiens OX=9606 GN=SERPINA3 PE=1 SV=2	0.0015	0.5631
sp|P05787|K2C8_HUMAN;sp|P08729|K2C7_HUMAN	P05787;P08729	7	11	6.6	483	53704	Keratin, type II cytoskeletal 8 OS=Homo sapiens OX=9606 GN=KRT8 PE=1 SV=7	0.0013	0.1641
sp|P20061|TCO1_HUMAN	P20061	9	11	27	433	48207	Transcobalamin-1 OS=Homo sapiens OX=9606 GN=TCN1 PE=1 SV=2	0.0014	0.8621
sp|A0A0B4J1Y9|HV372_HUMAN	A0A0B4J1Y9	6	10	35.3	119	13203	Immunoglobulin heavy variable 3-72 OS=Homo sapiens OX=9606 GN=IGHV3-72 PE=3 SV=1	0.0048	1.2542
sp|P01860|IGHG3_HUMAN	P01860	7	10	15.7	446	49093	Immunoglobulin heavy constant gamma 3 OS=Homo sapiens OX=9606 GN=IGHG3 PE=1 SV=3	0.0013	0.4355
sp|P49788|TIG1_HUMAN	P49788	7	10	20.7	294	33285	Retinoic acid receptor responder protein 1 OS=Homo sapiens OX=9606 GN=RARRES1 PE=1 SV=2	0.0019	0.6106
sp|P80303|NUCB2_HUMAN	P80303	10	10	28.3	420	50223	Nucleobindin-2 OS=Homo sapiens OX=9606 GN=NUCB2 PE=1 SV=3	0.0014	0.9187
sp|P02647|APOA1_HUMAN	P02647	7	9	32.6	267	30778	Apolipoprotein A-I OS=Homo sapiens OX=9606 GN=APOA1 PE=1 SV=1	0.0019	1.1184
sp|P04792|HSPB1_HUMAN	P04792	5	9	29.8	205	22783	Heat shock protein beta-1 OS=Homo sapiens OX=9606 GN=HSPB1 PE=1 SV=2	0.0025	0.9861
sp|P01009|A1AT_HUMAN	P01009	7	8	17.5	418	46737	Alpha-1-antitrypsin OS=Homo sapiens OX=9606 GN=SERPINA1 PE=1 SV=3	0.0011	0.4962
sp|P07339|CATD_HUMAN	P07339	5	8	16.3	412	44552	Cathepsin D OS=Homo sapiens OX=9606 GN=CTSD PE=1 SV=1	0.0011	0.4555
sp|Q96DA0|ZG16B_HUMAN	Q96DA0	7	8	22.6	208	22739	Zymogen granule protein 16 homolog B OS=Homo sapiens OX=9606 GN=ZG16B PE=1 SV=3	0.0022	0.6827
sp|P01033|TIMP1_HUMAN	P01033	5	7	32.9	207	23171	Metalloproteinase inhibitor 1 OS=Homo sapiens OX=9606 GN=TIMP1 PE=1 SV=1	0.0019	1.133
sp|P55058|PLTP_HUMAN	P55058	6	7	12.2	493	54739	Phospholipid transfer protein OS=Homo sapiens OX=9606 GN=PLTP PE=1 SV=1	0.0008	0.3243
sp|Q6UXB2|CXL17_HUMAN	Q6UXB2	5	7	28.6	119	13819	C-X-C motif chemokine 17 OS=Homo sapiens OX=9606 GN=CXCL17 PE=1 SV=1	0.0034	0.932
sp|A0A0B4J1X5|HV374_HUMAN	A0A0B4J1X5	6	6	50.4	117	12840	Immunoglobulin heavy variable 3-74 OS=Homo sapiens OX=9606 GN=IGHV3-74 PE=3 SV=1	0.0029	2.1915
sp|A0A0C4DH42|HV366_HUMAN;sp|P0DP02|HVC33_HUMAN;sp|P01772|HV333_HUMAN;sp|P01767|HV353_HUMAN	A0A0C4DH42;P0DP02;P01772;P01767	5	6	28.4	116	12698	Immunoglobulin heavy variable 3-66 OS=Homo sapiens OX=9606 GN=IGHV3-66 PE=3 SV=1	0.0029	0.9231
sp|P01764|HV323_HUMAN;sp|P0DP03|HVC05_HUMAN;sp|P01768|HV330_HUMAN	P01764;P0DP03;P01768	5	6	28.2	117	12582	Immunoglobulin heavy variable 3-23 OS=Homo sapiens OX=9606 GN=IGHV3-23 PE=1 SV=2	0.0029	0.9143
sp|P01780|HV307_HUMAN	P01780	5	6	35.9	117	12943	Immunoglobulin heavy variable 3-7 OS=Homo sapiens OX=9606 GN=IGHV3-7 PE=1 SV=2	0.0029	1.2856
sp|P02814|SMR3B_HUMAN	P02814	2	6	65.8	79	8188	Submaxillary gland androgen-regulated protein 3B OS=Homo sapiens OX=9606 GN=SMR3B PE=1 SV=2	0.0043	3.5499
sp|P04083|ANXA1_HUMAN	P04083	6	6	17.6	346	38714	Annexin A1 OS=Homo sapiens OX=9606 GN=ANXA1 PE=1 SV=2	0.001	0.4997
sp|P04406|G3P_HUMAN	P04406	5	6	24.5	335	36053	Glyceraldehyde-3-phosphate dehydrogenase OS=Homo sapiens OX=9606 GN=GAPDH PE=1 SV=3	0.001	0.7579
sp|P10599|THIO_HUMAN	P10599	4	6	47.6	105	11737	Thioredoxin OS=Homo sapiens OX=9606 GN=TXN PE=1 SV=3	0.0033	1.9923
sp|P26447|S10A4_HUMAN	P26447	6	6	31.7	101	11728	Protein S100-A4 OS=Homo sapiens OX=9606 GN=S100A4 PE=1 SV=1	0.0034	1.0749
sp|P35900|K1C20_HUMAN	P35900	5	6	4.5	424	48487	Keratin, type I cytoskeletal 20 OS=Homo sapiens OX=9606 GN=KRT20 PE=1 SV=1	0.0008	0.1092
sp|P81605|DCD_HUMAN	P81605	4	6	25.5	110	11284	Dermcidin OS=Homo sapiens OX=9606 GN=DCD PE=1 SV=2	0.0031	0.7989
sp|Q15782|CH3L2_HUMAN	Q15782	4	6	12.1	390	43501	Chitinase-3-like protein 2 OS=Homo sapiens OX=9606 GN=CHI3L2 PE=1 SV=1	0.0009	0.3213
sp|A0A075B6P5|KV228_HUMAN;sp|P01615|KVD28_HUMAN;sp|P01614|KVD40_HUMAN;sp|A0A087WW87|KV240_HUMAN	A0A075B6P5;P01615;P01614;A0A087WW87	3	5	16.7	120	12957	Immunoglobulin kappa variable 2-28 OS=Homo sapiens OX=9606 GN=IGKV2-28 PE=3 SV=1	0.0024	0.4689
sp|A0A0A0MS15|HV349_HUMAN	A0A0A0MS15	4	5	21	119	13056	Immunoglobulin heavy variable 3-49 OS=Homo sapiens OX=9606 GN=IGHV3-49 PE=3 SV=1	0.0024	0.6218
sp|O00584|RNT2_HUMAN	O00584	2	5	9.4	256	29481	Ribonuclease T2 OS=Homo sapiens OX=9606 GN=RNASET2 PE=1 SV=2	0.0011	0.2417
sp|P01782|HV309_HUMAN	P01782	4	5	34.7	118	12945	Immunoglobulin heavy variable 3-9 OS=Homo sapiens OX=9606 GN=IGHV3-9 PE=1 SV=2	0.0024	1.2233
sp|P02763|A1AG1_HUMAN	P02763	4	5	16.9	201	23540	Alpha-1-acid glycoprotein 1 OS=Homo sapiens OX=9606 GN=ORM1 PE=1 SV=2	0.0014	0.4757
sp|P06312|KV401_HUMAN	P06312	2	5	19.8	121	13380	Immunoglobulin kappa variable 4-1 OS=Homo sapiens OX=9606 GN=IGKV4-1 PE=1 SV=1	0.0024	0.5776
sp|P13987|CD59_HUMAN	P13987	4	5	25.8	128	14177	CD59 glycoprotein OS=Homo sapiens OX=9606 GN=CD59 PE=1 SV=1	0.0022	0.8113
sp|P59665|DEF1_HUMAN;sp|P59666|DEF3_HUMAN	P59665;P59666	4	5	20.2	94	10201	Neutrophil defensin 1 OS=Homo sapiens OX=9606 GN=DEFA1 PE=1 SV=1	0.003	0.5922
sp|Q6MZM9|PRR27_HUMAN	Q6MZM9	2	5	16.4	219	22720	Proline-rich protein 27 OS=Homo sapiens OX=9606 GN=PRR27 PE=2 SV=1	0.0013	0.4588
sp|Q8N1N4|K2C78_HUMAN	Q8N1N4	4	5	5.8	520	56866	Keratin, type II cytoskeletal 78 OS=Homo sapiens OX=9606 GN=KRT78 PE=1 SV=2	0.0005	0.1429
sp|Q96S96|PEBP4_HUMAN	Q96S96	3	5	25.1	227	25733	Phosphatidylethanolamine-binding protein 4 OS=Homo sapiens OX=9606 GN=PEBP4 PE=1 SV=3	0.0013	0.7824
sp|A0A075B6S2|KVD29_HUMAN;sp|A2NJV5|KV229_HUMAN;sp|A0A0A0MRZ7|KVD26_HUMAN	A0A075B6S2;A2NJV5;A0A0A0MRZ7	3	4	16.7	120	13143	Immunoglobulin kappa variable 2D-29 OS=Homo sapiens OX=9606 GN=IGKV2D-29 PE=3 SV=1	0.0019	0.4689
sp|P01597|KV139_HUMAN;sp|P04432|KVD39_HUMAN	P01597;P04432	3	4	36.8	117	12737	Immunoglobulin kappa variable 1-39 OS=Homo sapiens OX=9606 GN=IGKV1-39 PE=1 SV=2	0.0019	1.3335
sp|P01602|KV105_HUMAN	P01602	3	4	32.5	117	12782	Immunoglobulin kappa variable 1-5 OS=Homo sapiens OX=9606 GN=IGKV1-5 PE=1 SV=2	0.0019	1.1135
sp|P01619|KV320_HUMAN	P01619	3	4	27.6	116	12557	Immunoglobulin kappa variable 3-20 OS=Homo sapiens OX=9606 GN=IGKV3-20 PE=1 SV=2	0.002	0.888
sp|P05109|S10A8_HUMAN	P05109	3	4	31.2	93	10834	Protein S100-A8 OS=Homo sapiens OX=9606 GN=S100A8 PE=1 SV=1	0.0025	1.0512
sp|P06702|S10A9_HUMAN	P06702	4	4	35.1	114	13242	Protein S100-A9 OS=Homo sapiens OX=9606 GN=S100A9 PE=1 SV=1	0.002	1.2439
sp|P31749|AKT1_HUMAN;sp|Q9Y243|AKT3_HUMAN;sp|P31751|AKT2_HUMAN	P31749;Q9Y243;P31751	1	4	3.3	480	55686	RAC-alpha serine/threonine-protein kinase OS=Homo sapiens OX=9606 GN=AKT1 PE=1 SV=2	0.0005	0.0789
sp|P98088|MUC5A_HUMAN	P98088	2	4	1	5654	585574	Mucin-5AC OS=Homo sapiens OX=9606 GN=MUC5AC PE=1 SV=4	0	0.0233
sp|Q16630|CPSF6_HUMAN	Q16630	1	4	2	551	59210	Cleavage and polyadenylation specificity factor subunit 6 OS=Homo sapiens OX=9606 GN=CPSF6 PE=1 SV=2	0.0004	0.0471
sp|Q96LB3|IFT74_HUMAN	Q96LB3	1	4	2.5	600	69239	Intraflagellar transport protein 74 homolog OS=Homo sapiens OX=9606 GN=IFT74 PE=1 SV=1	0.0004	0.0593
sp|A0A075B6K4|LV310_HUMAN	A0A075B6K4	2	3	16.5	115	12441	Immunoglobulin lambda variable 3-10 OS=Homo sapiens OX=9606 GN=IGLV3-10 PE=3 SV=2	0.0015	0.4622
sp|A0A075B6R2|HV404_HUMAN;sp|P0DP08|HVD82_HUMAN;sp|P0DP07|HV431_HUMAN;sp|P0DP06|HVD34_HUMAN;sp|P06331|HV434_HUMAN;sp|P01825|HV459_HUMAN;sp|P01824|HV439_HUMAN;sp|A0A0C4DH41|HV461_HUMAN;sp|A0A087WSY4|HV432_HUMAN	A0A075B6R2;P0DP08;P0DP07;P0DP06;P06331;P01825;P01824;A0A0C4DH41;A0A087WSY4	2	3	18.8	117	12848	Immunoglobulin heavy variable 4-4 OS=Homo sapiens OX=9606 GN=IGHV4-4 PE=3 SV=2	0.0015	0.5417
sp|A0A075B6R9|KVD24_HUMAN;sp|A0A0C4DH68|KV224_HUMAN	A0A075B6R9;A0A0C4DH68	3	3	16.7	120	13079	Probable non-functional immunoglobulin kappa variable 2D-24 OS=Homo sapiens OX=9606 GN=IGKV2D-24 PE=1 SV=1	0.0014	0.4689
sp|A0A0C4DH25|KVD20_HUMAN	A0A0C4DH25	3	3	27.6	116	12515	Immunoglobulin kappa variable 3D-20 OS=Homo sapiens OX=9606 GN=IGKV3D-20 PE=3 SV=1	0.0015	0.888
sp|O60814|H2B1K_HUMAN;sp|Q99880|H2B1L_HUMAN;sp|Q99879|H2B1M_HUMAN;sp|Q99877|H2B1N_HUMAN;sp|Q93079|H2B1H_HUMAN;sp|Q8N257|H2B3B_HUMAN;sp|Q5QNW6|H2B2F_HUMAN;sp|Q16778|H2B2E_HUMAN;sp|P62807|H2B1C_HUMAN;sp|P58876|H2B1D_HUMAN;sp|P57053|H2BFS_HUMAN;sp|P33778|H2B1B_HUMAN;sp|P23527|H2B1O_HUMAN;sp|P06899|H2B1J_HUMAN	O60814;Q99880;Q99879;Q99877;Q93079;Q8N257;Q5QNW6;Q16778;P62807;P58876;P57053;P33778;P23527;P06899	2	3	19	126	13890	Histone H2B type 1-K OS=Homo sapiens OX=9606 GN=H2BC12 PE=1 SV=3	0.0014	0.5488
sp|P06310|KV230_HUMAN	P06310	2	3	16.7	120	13185	Immunoglobulin kappa variable 2-30 OS=Homo sapiens OX=9606 GN=IGKV2-30 PE=3 SV=2	0.0014	0.4689
sp|P07355|ANXA2_HUMAN	P07355	3	3	11.8	339	38604	Annexin A2 OS=Homo sapiens OX=9606 GN=ANXA2 PE=1 SV=2	0.0005	0.3122
sp|P07602|SAP_HUMAN	P07602	3	3	6.9	524	58113	Prosaposin OS=Homo sapiens OX=9606 GN=PSAP PE=1 SV=2	0.0003	0.1722
sp|P09211|GSTP1_HUMAN	P09211	2	3	17.1	210	23356	Glutathione S-transferase P OS=Homo sapiens OX=9606 GN=GSTP1 PE=1 SV=2	0.0008	0.4825
sp|P14314|GLU2B_HUMAN	P14314	3	3	5.9	528	59425	Glucosidase 2 subunit beta OS=Homo sapiens OX=9606 GN=PRKCSH PE=1 SV=2	0.0003	0.1455
sp|P30740|ILEU_HUMAN	P30740	3	3	9.5	379	42742	Leukocyte elastase inhibitor OS=Homo sapiens OX=9606 GN=SERPINB1 PE=1 SV=1	0.0005	0.2445
sp|P31949|S10AB_HUMAN	P31949	2	3	22.9	105	11740	Protein S100-A11 OS=Homo sapiens OX=9606 GN=S100A11 PE=1 SV=2	0.0016	0.6943
sp|P34096|RNAS4_HUMAN	P34096	3	3	17	147	16840	Ribonuclease 4 OS=Homo sapiens OX=9606 GN=RNASE4 PE=1 SV=3	0.0012	0.4791
sp|P62805|H4_HUMAN	P62805	3	3	34	103	11367	Histone H4 OS=Homo sapiens OX=9606 GN=H4C1 PE=1 SV=2	0.0017	1.1878
sp|Q709C8|VP13C_HUMAN	Q709C8	2	3	0.6	3753	422393	Intermembrane lipid transfer protein VPS13C OS=Homo sapiens OX=9606 GN=VPS13C PE=1 SV=1	0	0.0139
sp|A0A075B6S5|KV127_HUMAN;sp|A0A0C4DH69|KV109_HUMAN;sp|A0A0C4DH67|KV108_HUMAN	A0A075B6S5;A0A0C4DH69;A0A0C4DH67	2	2	18.8	117	12711	Immunoglobulin kappa variable 1-27 OS=Homo sapiens OX=9606 GN=IGKV1-27 PE=3 SV=1	0.001	0.5417
sp|A0A0C4DH36|HV338_HUMAN	A0A0C4DH36	2	2	15.5	116	12759	Probable non-functional immunoglobulin heavy variable 3-38 OS=Homo sapiens OX=9606 GN=IGHV3-38 PE=1 SV=1	0.001	0.4289
sp|A0A0J9YVY3|HV741_HUMAN	A0A0J9YVY3	2	2	10.3	117	12849	Immunoglobulin heavy variable 7-4-1 OS=Homo sapiens OX=9606 GN=IGHV7-4-1 PE=3 SV=1	0.001	0.2677
sp|P00751|CFAB_HUMAN	P00751	2	2	2.9	764	85533	Complement factor B OS=Homo sapiens OX=9606 GN=CFB PE=1 SV=2	0.0001	0.0691
sp|P04075|ALDOA_HUMAN	P04075	1	2	5.5	364	39420	Fructose-bisphosphate aldolase A OS=Homo sapiens OX=9606 GN=ALDOA PE=1 SV=2	0.0003	0.135
sp|P05090|APOD_HUMAN	P05090	2	2	13.8	189	21276	Apolipoprotein D OS=Homo sapiens OX=9606 GN=APOD PE=1 SV=1	0.0006	0.374
sp|P06733|ENOA_HUMAN	P06733	2	2	5.8	434	47169	Alpha-enolase OS=Homo sapiens OX=9606 GN=ENO1 PE=1 SV=2	0.0003	0.1429
sp|P14923|PLAK_HUMAN	P14923	2	2	3.2	745	81745	Junction plakoglobin OS=Homo sapiens OX=9606 GN=JUP PE=1 SV=3	0.0002	0.0765
sp|Q06830|PRDX1_HUMAN;sp|Q13162|PRDX4_HUMAN	Q06830;Q13162	1	2	6	199	22110	Peroxiredoxin-1 OS=Homo sapiens OX=9606 GN=PRDX1 PE=1 SV=1	0.0006	0.1482
sp|Q14515|SPRL1_HUMAN	Q14515	2	2	5.3	664	75208	SPARC-like protein 1 OS=Homo sapiens OX=9606 GN=SPARCL1 PE=1 SV=2	0.0002	0.1298
sp|Q14697|GANAB_HUMAN	Q14697	2	2	3.4	944	106874	Neutral alpha-glucosidase AB OS=Homo sapiens OX=9606 GN=GANAB PE=1 SV=3	0.0001	0.0814
sp|Q5T2L2|AKCL1_HUMAN	Q5T2L2	1	2	9.3	129	14588	Putative aldo-keto reductase family 1 member C8 OS=Homo sapiens OX=9606 GN=AKR1C8 PE=5 SV=2	0.0009	0.2388
sp|Q96BQ1|FAM3D_HUMAN	Q96BQ1	1	2	8	224	24963	Protein FAM3D OS=Homo sapiens OX=9606 GN=FAM3D PE=1 SV=1	0.0005	0.2023
sp|Q9UBC9|SPRR3_HUMAN	Q9UBC9	1	2	8.9	169	18154	Small proline-rich protein 3 OS=Homo sapiens OX=9606 GN=SPRR3 PE=1 SV=2	0.0007	0.2274
sp|A0A0B4J2H0|HV69D_HUMAN;sp|P0DP01|HV108_HUMAN;sp|P01743|HV146_HUMAN;sp|P01742|HV169_HUMAN;sp|A0A0C4DH29|HV103_HUMAN	A0A0B4J2H0;P0DP01;P01743;P01742;A0A0C4DH29	1	1	9.4	117	12660	Immunoglobulin heavy variable 1-69D OS=Homo sapiens OX=9606 GN=IGHV1-69D PE=1 SV=1	0.0005	0.2417
sp|A6NNZ2|TBB8B_HUMAN;sp|Q9BVA1|TBB2B_HUMAN;sp|Q9BUF5|TBB6_HUMAN;sp|Q3ZCM7|TBB8_HUMAN;sp|Q13885|TBB2A_HUMAN;sp|P68371|TBB4B_HUMAN;sp|P07437|TBB5_HUMAN;sp|P04350|TBB4A_HUMAN	A6NNZ2;Q9BVA1;Q9BUF5;Q3ZCM7;Q13885;P68371;P07437;P04350	1	1	3.2	444	49573	Tubulin beta 8B OS=Homo sapiens OX=9606 GN=TUBB8B PE=1 SV=1	0.0001	0.0765
sp|O00391|QSOX1_HUMAN	O00391	1	1	2.7	747	82578	Sulfhydryl oxidase 1 OS=Homo sapiens OX=9606 GN=QSOX1 PE=1 SV=3	0.0001	0.0641
sp|O43653|PSCA_HUMAN	O43653	1	1	8.8	114	11959	Prostate stem cell antigen OS=Homo sapiens OX=9606 GN=PSCA PE=1 SV=2	0.0005	0.2246
sp|O60888|CUTA_HUMAN	O60888	1	1	7.8	179	19116	Protein CutA OS=Homo sapiens OX=9606 GN=CUTA PE=1 SV=2	0.0003	0.1967
sp|P01700|LV147_HUMAN	P01700	1	1	11.1	117	12284	Immunoglobulin lambda variable 1-47 OS=Homo sapiens OX=9606 GN=IGLV1-47 PE=1 SV=2	0.0005	0.2912
sp|P01701|LV151_HUMAN	P01701	1	1	24.8	117	12249	Immunoglobulin lambda variable 1-51 OS=Homo sapiens OX=9606 GN=IGLV1-51 PE=1 SV=2	0.0005	0.7701
sp|P01704|LV214_HUMAN	P01704	1	1	13.3	120	12597	Immunoglobulin lambda variable 2-14 OS=Homo sapiens OX=9606 GN=IGLV2-14 PE=1 SV=2	0.0005	0.3583
sp|P02652|APOA2_HUMAN	P02652	1	1	10	100	11175	Apolipoprotein A-II OS=Homo sapiens OX=9606 GN=APOA2 PE=1 SV=1	0.0006	0.2589
sp|P02765|FETUA_HUMAN	P02765	1	1	5.4	367	39341	Alpha-2-HS-glycoprotein OS=Homo sapiens OX=9606 GN=AHSG PE=1 SV=2	0.0002	0.1324
sp|P02790|HEMO_HUMAN	P02790	1	1	1.7	462	51676	Hemopexin OS=Homo sapiens OX=9606 GN=HPX PE=1 SV=2	0.0001	0.0399
sp|P04746|AMYP_HUMAN;sp|P19961|AMY2B_HUMAN;sp|P0DUB6|AMY1A_HUMAN;sp|P0DTE8|AMY1C_HUMAN;sp|P0DTE7|AMY1B_HUMAN	P04746;P19961;P0DUB6;P0DTE8;P0DTE7	1	1	2.9	511	57707	Pancreatic alpha-amylase OS=Homo sapiens OX=9606 GN=AMY2A PE=1 SV=2	0.0001	0.0691
sp|P04908|H2A1B_HUMAN;sp|Q9BTM1|H2AJ_HUMAN;sp|Q99878|H2A1J_HUMAN;sp|Q96QV6|H2A1A_HUMAN;sp|Q96KK5|H2A1H_HUMAN;sp|Q93077|H2A1C_HUMAN;sp|Q8IUE6|H2A2B_HUMAN;sp|Q7L7L0|H2A3_HUMAN;sp|Q71UI9|H2AV_HUMAN;sp|Q6FI13|H2A2A_HUMAN;sp|Q16777|H2A2C_HUMAN;sp|P20671|H2A1D_HUMAN;sp|P16104|H2AX_HUMAN;sp|P0C0S8|H2A1_HUMAN;sp|P0C0S5|H2AZ_HUMAN	P04908;Q9BTM1;Q99878;Q96QV6;Q96KK5;Q93077;Q8IUE6;Q7L7L0;Q71UI9;Q6FI13;Q16777;P20671;P16104;P0C0S8;P0C0S5	1	1	6.9	130	14135	Histone H2A type 1-B/E OS=Homo sapiens OX=9606 GN=H2AC4 PE=1 SV=2	0.0004	0.1722
sp|P08311|CATG_HUMAN	P08311	1	1	3.5	255	28837	Cathepsin G OS=Homo sapiens OX=9606 GN=CTSG PE=1 SV=2	0.0002	0.0839
sp|P0DJI8|SAA1_HUMAN;sp|P0DJI9|SAA2_HUMAN	P0DJI8;P0DJI9	1	1	11.5	122	13532	Serum amyloid A-1 protein OS=Homo sapiens OX=9606 GN=SAA1 PE=1 SV=1	0.0005	0.3032
sp|P15328|FOLR1_HUMAN	P15328	1	1	4.3	257	29819	Folate receptor alpha OS=Homo sapiens OX=9606 GN=FOLR1 PE=1 SV=3	0.0002	0.1041
sp|P21926|CD9_HUMAN	P21926	1	1	4.4	228	25416	CD9 antigen OS=Homo sapiens OX=9606 GN=CD9 PE=1 SV=4	0.0002	0.1066
sp|P29508|SPB3_HUMAN	P29508	1	1	2.6	390	44565	Serpin B3 OS=Homo sapiens OX=9606 GN=SERPINB3 PE=1 SV=2	0.0001	0.0617
sp|P32298|GRK4_HUMAN;sp|P43250|GRK6_HUMAN;sp|P34947|GRK5_HUMAN	P32298;P43250;P34947	1	1	2.1	578	66583	G protein-coupled receptor kinase 4 OS=Homo sapiens OX=9606 GN=GRK4 PE=1 SV=3	0.0001	0.0495
sp|P68104|EF1A1_HUMAN;sp|Q5VTE0|EF1A3_HUMAN;sp|Q05639|EF1A2_HUMAN	P68104;Q5VTE0;Q05639	1	1	2.4	462	50141	Elongation factor 1-alpha 1 OS=Homo sapiens OX=9606 GN=EEF1A1 PE=1 SV=1	0.0001	0.0568
sp|Q01469|FABP5_HUMAN	Q01469	1	1	10.4	135	15164	Fatty acid-binding protein 5 OS=Homo sapiens OX=9606 GN=FABP5 PE=1 SV=3	0.0004	0.2706
sp|Q14508|WFDC2_HUMAN	Q14508	1	1	11.3	124	12993	WAP four-disulfide core domain protein 2 OS=Homo sapiens OX=9606 GN=WFDC2 PE=1 SV=2	0.0005	0.2972
sp|Q16651|PRSS8_HUMAN	Q16651	1	1	5.5	343	36431	Prostasin OS=Homo sapiens OX=9606 GN=PRSS8 PE=1 SV=1	0.0002	0.135
sp|Q8NGG2|OR5T2_HUMAN	Q8NGG2	1	1	1.9	359	40696	Olfactory receptor 5T2 OS=Homo sapiens OX=9606 GN=OR5T2 PE=2 SV=3	0.0002	0.0447
sp|Q8WXG9|AGRV1_HUMAN	Q8WXG9	1	1	0.1	6306	693082	Adhesion G-protein coupled receptor V1 OS=Homo sapiens OX=9606 GN=ADGRV1 PE=1 SV=2	0	0.0023
sp|Q92743|HTRA1_HUMAN	Q92743	1	1	2.3	480	51287	Serine protease HTRA1 OS=Homo sapiens OX=9606 GN=HTRA1 PE=1 SV=1	0.0001	0.0544
sp|Q96DR8|MUCL1_HUMAN	Q96DR8	1	1	10	90	9039	Mucin-like protein 1 OS=Homo sapiens OX=9606 GN=MUCL1 PE=1 SV=1	0.0006	0.2589

## Sheet: 6) 200ng-21min#3 (207)
Protein Group Name	Protein Accession	Number Stripped Peptides	Number PSMs	Protein Coverage	Protein Length	Protein Molecular Weight	Protein Description	NSAF Score	EmPAI Score
sp|P02788|TRFL_HUMAN	P02788	188	708	88.6	710	78182	Lactotransferrin OS=Homo sapiens OX=9606 GN=LTF PE=1 SV=6	0.0523	6.6913
sp|P61626|LYSC_HUMAN	P61626	51	231	85.1	148	16537	Lysozyme C OS=Homo sapiens OX=9606 GN=LYZ PE=1 SV=1	0.0819	6.0958
sp|P01833|PIGR_HUMAN	P01833	81	208	59.3	764	83284	Polymeric immunoglobulin receptor OS=Homo sapiens OX=9606 GN=PIGR PE=1 SV=4	0.0143	2.9174
sp|P31025|LCN1_HUMAN	P31025	53	191	78.4	176	19250	Lipocalin-1 OS=Homo sapiens OX=9606 GN=LCN1 PE=1 SV=1	0.057	5.0814
sp|P02768|ALBU_HUMAN	P02768	90	187	89.2	609	69367	Albumin OS=Homo sapiens OX=9606 GN=ALB PE=1 SV=2	0.0161	6.7983
sp|P01876|IGHA1_HUMAN	P01876	40	183	62.3	398	42849	Immunoglobulin heavy constant alpha 1 OS=Homo sapiens OX=9606 GN=IGHA1 PE=1 SV=3	0.0241	3.1976
sp|P12273|PIP_HUMAN	P12273	31	127	77.4	146	16572	Prolactin-inducible protein OS=Homo sapiens OX=9606 GN=PIP PE=1 SV=1	0.0457	4.9429
sp|P04264|K2C1_HUMAN	P04264	63	121	63.8	644	66039	Keratin, type II cytoskeletal 1 OS=Homo sapiens OX=9606 GN=KRT1 PE=1 SV=6	0.0099	3.3451
sp|P25311|ZA2G_HUMAN	P25311	43	117	64.8	298	34259	Zinc-alpha-2-glycoprotein OS=Homo sapiens OX=9606 GN=AZGP1 PE=1 SV=2	0.0206	3.4463
sp|P01024|CO3_HUMAN	P01024	75	106	35.2	1663	187147	Complement C3 OS=Homo sapiens OX=9606 GN=C3 PE=1 SV=2	0.0033	1.2491
sp|P0DOX2|IGA2_HUMAN	P0DOX2	23	94	38.9	455	48934	Immunoglobulin alpha-2 heavy chain OS=Homo sapiens OX=9606 PE=1 SV=2	0.0108	1.4491
sp|Q9GZZ8|LACRT_HUMAN	Q9GZZ8	25	93	43.5	138	14246	Extracellular glycoprotein lacritin OS=Homo sapiens OX=9606 GN=LACRT PE=1 SV=1	0.0354	1.7227
sp|P01877|IGHA2_HUMAN	P01877	19	90	31.5	391	42334	Immunoglobulin heavy constant alpha 2 OS=Homo sapiens OX=9606 GN=IGHA2 PE=1 SV=5	0.0121	1.0654
sp|P35527|K1C9_HUMAN	P35527	47	90	58.9	623	62064	Keratin, type I cytoskeletal 9 OS=Homo sapiens OX=9606 GN=KRT9 PE=1 SV=3	0.0076	2.8815
sp|P01834|IGKC_HUMAN	P01834	21	88	97.2	107	11765	Immunoglobulin kappa constant OS=Homo sapiens OX=9606 GN=IGKC PE=1 SV=2	0.0432	8.3756
sp|P98160|PGBM_HUMAN	P98160	64	87	18.3	4391	468835	Basement membrane-specific heparan sulfate proteoglycan core protein OS=Homo sapiens OX=9606 GN=HSPG2 PE=1 SV=4	0.001	0.5241
sp|P35908|K22E_HUMAN	P35908	53	86	58.2	639	65433	Keratin, type II cytoskeletal 2 epidermal OS=Homo sapiens OX=9606 GN=KRT2 PE=1 SV=2	0.0071	2.8194
sp|Q9UGM3|DMBT1_HUMAN	Q9UGM3	40	84	38.5	2413	260734	Deleted in malignant brain tumors 1 protein OS=Homo sapiens OX=9606 GN=DMBT1 PE=1 SV=2	0.0018	1.4266
sp|O75556|SG2A1_HUMAN	O75556	26	78	73.7	95	10884	Mammaglobin-B OS=Homo sapiens OX=9606 GN=SCGB2A1 PE=1 SV=1	0.0431	4.4576
sp|P01036|CYTS_HUMAN	P01036	24	77	76.6	141	16214	Cystatin-S OS=Homo sapiens OX=9606 GN=CST4 PE=1 SV=3	0.0287	4.8345
sp|P13645|K1C10_HUMAN	P13645	44	76	59.9	584	58827	Keratin, type I cytoskeletal 10 OS=Homo sapiens OX=9606 GN=KRT10 PE=1 SV=6	0.0068	2.9719
sp|Q16378|PROL4_HUMAN	Q16378	14	74	37.3	134	15097	Proline-rich protein 4 OS=Homo sapiens OX=9606 GN=PRR4 PE=1 SV=3	0.029	1.3605
sp|P0DOX7|IGK_HUMAN	P0DOX7	20	72	65	214	23379	Immunoglobulin kappa light chain OS=Homo sapiens OX=9606 PE=1 SV=1	0.0177	3.4668
sp|P13647|K2C5_HUMAN	P13647	47	69	46.8	590	62378	Keratin, type II cytoskeletal 5 OS=Homo sapiens OX=9606 GN=KRT5 PE=1 SV=3	0.0061	1.9376
sp|Q99935|PROL1_HUMAN	Q99935	11	69	31.9	248	27216	Opiorphin prepropeptide OS=Homo sapiens OX=9606 GN=OPRPN PE=1 SV=2	0.0146	1.0845
sp|P02538|K2C6A_HUMAN	P02538	42	62	49.1	564	60045	Keratin, type II cytoskeletal 6A OS=Homo sapiens OX=9606 GN=KRT6A PE=1 SV=3	0.0058	2.0974
sp|P48668|K2C6C_HUMAN	P48668	41	61	46.1	564	60025	Keratin, type II cytoskeletal 6C OS=Homo sapiens OX=9606 GN=KRT6C PE=1 SV=3	0.0057	1.8907
sp|P01037|CYTN_HUMAN	P01037	17	57	61.7	141	16388	Cystatin-SN OS=Homo sapiens OX=9606 GN=CST1 PE=1 SV=3	0.0212	3.14
sp|P0DOY3|IGLC3_HUMAN	P0DOY3	17	56	93.4	106	11266	Immunoglobulin lambda constant 3 OS=Homo sapiens OX=9606 GN=IGLC3 PE=1 SV=1	0.0277	7.5901
sp|Q13421|MSLN_HUMAN	Q13421	28	56	38.4	630	68986	Mesothelin OS=Homo sapiens OX=9606 GN=MSLN PE=1 SV=2	0.0047	1.421
sp|P04259|K2C6B_HUMAN	P04259	37	55	41.5	564	60067	Keratin, type II cytoskeletal 6B OS=Homo sapiens OX=9606 GN=KRT6B PE=1 SV=5	0.0051	1.6002
sp|P02533|K1C14_HUMAN	P02533	34	51	54.2	472	51561	Keratin, type I cytoskeletal 14 OS=Homo sapiens OX=9606 GN=KRT14 PE=1 SV=4	0.0057	2.4834
sp|P13646|K1C13_HUMAN	P13646	32	50	57	458	49588	Keratin, type I cytoskeletal 13 OS=Homo sapiens OX=9606 GN=KRT13 PE=1 SV=4	0.0057	2.7154
sp|P01591|IGJ_HUMAN	P01591	23	49	69.8	159	18099	Immunoglobulin J chain OS=Homo sapiens OX=9606 GN=JCHAIN PE=1 SV=4	0.0162	3.9888
sp|P0DOX8|IGL1_HUMAN	P0DOX8	13	46	55.6	216	22830	Immunoglobulin lambda-1 light chain OS=Homo sapiens OX=9606 PE=1 SV=1	0.0112	2.5975
sp|O95968|SG1D1_HUMAN	O95968	17	44	46.7	90	9898	Secretoglobin family 1D member 1 OS=Homo sapiens OX=9606 GN=SCGB1D1 PE=1 SV=1	0.0257	1.9309
sp|P10909|CLUS_HUMAN	P10909	23	43	32.1	449	52495	Clusterin OS=Homo sapiens OX=9606 GN=CLU PE=1 SV=1	0.005	1.0941
sp|P01871|IGHM_HUMAN	P01871	20	35	38.6	474	51924	Immunoglobulin heavy constant mu OS=Homo sapiens OX=9606 GN=IGHM PE=1 SV=5	0.0039	1.4322
sp|P08779|K1C16_HUMAN	P08779	22	35	31.1	473	51268	Keratin, type I cytoskeletal 16 OS=Homo sapiens OX=9606 GN=KRT16 PE=1 SV=4	0.0039	1.0464
sp|P14555|PA2GA_HUMAN	P14555	15	32	56.2	144	16083	Phospholipase A2, membrane associated OS=Homo sapiens OX=9606 GN=PLA2G2A PE=1 SV=2	0.0117	2.6475
sp|P22079|PERL_HUMAN	P22079	22	32	28.4	712	80288	Lactoperoxidase OS=Homo sapiens OX=9606 GN=LPO PE=1 SV=2	0.0024	0.9231
sp|P0DOX6|IGM_HUMAN	P0DOX6	18	31	25.9	576	63486	Immunoglobulin mu heavy chain OS=Homo sapiens OX=9606 PE=1 SV=2	0.0028	0.8155
sp|P19013|K2C4_HUMAN	P19013	20	31	40.8	520	56144	Keratin, type II cytoskeletal 4 OS=Homo sapiens OX=9606 GN=KRT4 PE=1 SV=5	0.0031	1.5586
sp|Q08380|LG3BP_HUMAN	Q08380	21	31	35.7	585	65331	Galectin-3-binding protein OS=Homo sapiens OX=9606 GN=LGALS3BP PE=1 SV=1	0.0028	1.2751
sp|P12035|K2C3_HUMAN	P12035	19	28	13.2	628	64417	Keratin, type II cytoskeletal 3 OS=Homo sapiens OX=9606 GN=KRT3 PE=1 SV=3	0.0023	0.3552
sp|P60709|ACTB_HUMAN;sp|P63261|ACTG_HUMAN	P60709;P63261	19	28	46.4	375	41737	Actin, cytoplasmic 1 OS=Homo sapiens OX=9606 GN=ACTB PE=1 SV=1	0.0039	1.9107
sp|P00450|CERU_HUMAN	P00450	18	27	22.9	1065	122205	Ceruloplasmin OS=Homo sapiens OX=9606 GN=CP PE=1 SV=1	0.0013	0.6943
sp|Q01546|K22O_HUMAN	Q01546	18	27	11.9	638	65841	Keratin, type II cytoskeletal 2 oral OS=Homo sapiens OX=9606 GN=KRT76 PE=1 SV=2	0.0022	0.3152
sp|P00738|HPT_HUMAN	P00738	17	26	36.2	406	45205	Haptoglobin OS=Homo sapiens OX=9606 GN=HP PE=1 SV=1	0.0034	1.3014
sp|Q5XKE5|K2C79_HUMAN	Q5XKE5	16	25	13.1	535	57836	Keratin, type II cytoskeletal 79 OS=Homo sapiens OX=9606 GN=KRT79 PE=1 SV=2	0.0025	0.3521
sp|P02787|TRFE_HUMAN	P02787	20	24	31.1	698	77050	Serotransferrin OS=Homo sapiens OX=9606 GN=TF PE=1 SV=4	0.0018	1.0464
sp|P19012|K1C15_HUMAN	P19012	15	24	21.7	456	49212	Keratin, type I cytoskeletal 15 OS=Homo sapiens OX=9606 GN=KRT15 PE=1 SV=3	0.0028	0.6482
sp|P61769|B2MG_HUMAN	P61769	15	21	78.2	119	13715	Beta-2-microglobulin OS=Homo sapiens OX=9606 GN=B2M PE=1 SV=1	0.0093	5.0534
sp|Q04695|K1C17_HUMAN	Q04695	15	21	17.4	432	48106	Keratin, type I cytoskeletal 17 OS=Homo sapiens OX=9606 GN=KRT17 PE=1 SV=2	0.0026	0.4928
sp|P03973|SLPI_HUMAN	P03973	12	20	66.7	132	14326	Antileukoproteinase OS=Homo sapiens OX=9606 GN=SLPI PE=1 SV=2	0.008	3.6452
sp|P68032|ACTC_HUMAN;sp|P68133|ACTS_HUMAN	P68032;P68133	16	20	32.1	377	42019	Actin, alpha cardiac muscle 1 OS=Homo sapiens OX=9606 GN=ACTC1 PE=1 SV=1	0.0028	1.0941
sp|P01034|CYTC_HUMAN	P01034	7	19	48.6	146	15799	Cystatin-C OS=Homo sapiens OX=9606 GN=CST3 PE=1 SV=1	0.0068	2.062
sp|P07858|CATB_HUMAN	P07858	13	19	29.8	339	37822	Cathepsin B OS=Homo sapiens OX=9606 GN=CTSB PE=1 SV=3	0.0029	0.9861
sp|P80188|NGAL_HUMAN	P80188	12	19	56.6	198	22588	Neutrophil gelatinase-associated lipocalin OS=Homo sapiens OX=9606 GN=LCN2 PE=1 SV=2	0.005	2.6813
sp|P20061|TCO1_HUMAN	P20061	12	18	30.5	433	48207	Transcobalamin-1 OS=Homo sapiens OX=9606 GN=TCN1 PE=1 SV=2	0.0022	1.0184
sp|P06396|GELS_HUMAN	P06396	14	16	23.4	782	85697	Gelsolin OS=Homo sapiens OX=9606 GN=GSN PE=1 SV=1	0.0011	0.714
sp|Q8N474|SFRP1_HUMAN	Q8N474	13	16	31.8	314	35386	Secreted frizzled-related protein 1 OS=Homo sapiens OX=9606 GN=SFRP1 PE=1 SV=1	0.0027	1.0797
sp|P08727|K1C19_HUMAN	P08727	12	15	27.5	400	44106	Keratin, type I cytoskeletal 19 OS=Homo sapiens OX=9606 GN=KRT19 PE=1 SV=4	0.002	0.8836
sp|Q86Y46|K2C73_HUMAN	Q86Y46	10	14	11.9	540	58923	Keratin, type II cytoskeletal 73 OS=Homo sapiens OX=9606 GN=KRT73 PE=1 SV=1	0.0014	0.3152
sp|P04083|ANXA1_HUMAN	P04083	11	13	33.8	346	38714	Annexin A1 OS=Homo sapiens OX=9606 GN=ANXA1 PE=1 SV=2	0.002	1.1777
sp|P0DOX5|IGG1_HUMAN	P0DOX5	12	13	34.3	449	49329	Immunoglobulin gamma-1 heavy chain OS=Homo sapiens OX=9606 PE=1 SV=2	0.0015	1.2029
sp|Q96DA0|ZG16B_HUMAN	Q96DA0	9	13	33.7	208	22739	Zymogen granule protein 16 homolog B OS=Homo sapiens OX=9606 GN=ZG16B PE=1 SV=3	0.0033	1.1727
sp|P01009|A1AT_HUMAN	P01009	8	12	17.5	418	46737	Alpha-1-antitrypsin OS=Homo sapiens OX=9606 GN=SERPINA1 PE=1 SV=3	0.0015	0.4962
sp|P01619|KV320_HUMAN	P01619	5	12	46.6	116	12557	Immunoglobulin kappa variable 3-20 OS=Homo sapiens OX=9606 GN=IGKV3-20 PE=1 SV=2	0.0054	1.9242
sp|P05787|K2C8_HUMAN	P05787	9	12	7.2	483	53704	Keratin, type II cytoskeletal 8 OS=Homo sapiens OX=9606 GN=KRT8 PE=1 SV=7	0.0013	0.1803
sp|P07355|ANXA2_HUMAN	P07355	7	11	24.5	339	38604	Annexin A2 OS=Homo sapiens OX=9606 GN=ANXA2 PE=1 SV=2	0.0017	0.7579
sp|P07602|SAP_HUMAN	P07602	8	11	20.4	524	58113	Prosaposin OS=Homo sapiens OX=9606 GN=PSAP PE=1 SV=2	0.0011	0.5996
sp|P80303|NUCB2_HUMAN	P80303	9	11	16.9	420	50223	Nucleobindin-2 OS=Homo sapiens OX=9606 GN=NUCB2 PE=1 SV=3	0.0014	0.4757
sp|A0A0B4J1Y9|HV372_HUMAN	A0A0B4J1Y9	6	10	35.3	119	13203	Immunoglobulin heavy variable 3-72 OS=Homo sapiens OX=9606 GN=IGHV3-72 PE=3 SV=1	0.0044	1.2542
sp|P02647|APOA1_HUMAN	P02647	8	10	29.6	267	30778	Apolipoprotein A-I OS=Homo sapiens OX=9606 GN=APOA1 PE=1 SV=1	0.002	0.977
sp|P07339|CATD_HUMAN	P07339	8	10	27.7	412	44552	Cathepsin D OS=Homo sapiens OX=9606 GN=CTSD PE=1 SV=1	0.0013	0.8923
sp|P34096|RNAS4_HUMAN	P34096	7	10	29.3	147	16840	Ribonuclease 4 OS=Homo sapiens OX=9606 GN=RNASE4 PE=1 SV=3	0.0036	0.9634
sp|Q14CN4|K2C72_HUMAN	Q14CN4	8	10	7.2	511	55877	Keratin, type II cytoskeletal 72 OS=Homo sapiens OX=9606 GN=KRT72 PE=1 SV=2	0.001	0.1803
sp|Q3SY84|K2C71_HUMAN	Q3SY84	8	10	10.5	523	57292	Keratin, type II cytoskeletal 71 OS=Homo sapiens OX=9606 GN=KRT71 PE=1 SV=3	0.001	0.2735
sp|A0A0B4J1X5|HV374_HUMAN	A0A0B4J1X5	8	9	54.7	117	12840	Immunoglobulin heavy variable 3-74 OS=Homo sapiens OX=9606 GN=IGHV3-74 PE=3 SV=1	0.004	2.5237
sp|P01011|AACT_HUMAN	P01011	7	9	20.1	423	47651	Alpha-1-antichymotrypsin OS=Homo sapiens OX=9606 GN=SERPINA3 PE=1 SV=2	0.0011	0.5885
sp|P01768|HV330_HUMAN;sp|P0DP03|HVC05_HUMAN	P01768;P0DP03	7	9	44.4	117	12947	Immunoglobulin heavy variable 3-30 OS=Homo sapiens OX=9606 GN=IGHV3-30 PE=1 SV=2	0.004	1.7797
sp|P01772|HV333_HUMAN	P01772	7	9	44.4	117	13074	Immunoglobulin heavy variable 3-33 OS=Homo sapiens OX=9606 GN=IGHV3-33 PE=1 SV=2	0.004	1.7797
sp|P04792|HSPB1_HUMAN	P04792	5	9	25.9	205	22783	Heat shock protein beta-1 OS=Homo sapiens OX=9606 GN=HSPB1 PE=1 SV=2	0.0023	0.8155
sp|P26447|S10A4_HUMAN	P26447	5	9	28.7	101	11728	Protein S100-A4 OS=Homo sapiens OX=9606 GN=S100A4 PE=1 SV=1	0.0047	0.9364
sp|P01782|HV309_HUMAN	P01782	5	8	28	118	12945	Immunoglobulin heavy variable 3-9 OS=Homo sapiens OX=9606 GN=IGHV3-9 PE=1 SV=2	0.0036	0.9055
sp|P06702|S10A9_HUMAN	P06702	7	8	42.1	114	13242	Protein S100-A9 OS=Homo sapiens OX=9606 GN=S100A9 PE=1 SV=1	0.0037	1.6363
sp|P49788|TIG1_HUMAN	P49788	7	8	20.7	294	33285	Retinoic acid receptor responder protein 1 OS=Homo sapiens OX=9606 GN=RARRES1 PE=1 SV=2	0.0014	0.6106
sp|Q14697|GANAB_HUMAN	Q14697	7	8	8.3	944	106874	Neutral alpha-glucosidase AB OS=Homo sapiens OX=9606 GN=GANAB PE=1 SV=3	0.0004	0.2106
sp|A0A0C4DH72|KV106_HUMAN	A0A0C4DH72	4	7	31.6	117	12697	Immunoglobulin kappa variable 1-6 OS=Homo sapiens OX=9606 GN=IGKV1-6 PE=3 SV=1	0.0031	1.0701
sp|P04406|G3P_HUMAN	P04406	6	7	25.7	335	36053	Glyceraldehyde-3-phosphate dehydrogenase OS=Homo sapiens OX=9606 GN=GAPDH PE=1 SV=3	0.0011	0.8072
sp|P0DP04|HV43D_HUMAN	P0DP04	4	7	28	118	13017	Immunoglobulin heavy variable 3-43D OS=Homo sapiens OX=9606 GN=IGHV3-43D PE=3 SV=1	0.0031	0.9055
sp|P30740|ILEU_HUMAN	P30740	5	7	18.2	379	42742	Leukocyte elastase inhibitor OS=Homo sapiens OX=9606 GN=SERPINB1 PE=1 SV=1	0.001	0.5205
sp|P55058|PLTP_HUMAN	P55058	6	7	10.5	493	54739	Phospholipid transfer protein OS=Homo sapiens OX=9606 GN=PLTP PE=1 SV=1	0.0007	0.2735
sp|Q14515|SPRL1_HUMAN	Q14515	6	7	14.9	664	75208	SPARC-like protein 1 OS=Homo sapiens OX=9606 GN=SPARCL1 PE=1 SV=2	0.0006	0.4093
sp|Q6UXB2|CXL17_HUMAN	Q6UXB2	5	7	28.6	119	13819	C-X-C motif chemokine 17 OS=Homo sapiens OX=9606 GN=CXCL17 PE=1 SV=1	0.0031	0.932
sp|Q7Z794|K2C1B_HUMAN	Q7Z794	5	7	5.5	578	61901	Keratin, type II cytoskeletal 1b OS=Homo sapiens OX=9606 GN=KRT77 PE=1 SV=3	0.0006	0.135
sp|Q96S96|PEBP4_HUMAN	Q96S96	4	7	27.3	227	25733	Phosphatidylethanolamine-binding protein 4 OS=Homo sapiens OX=9606 GN=PEBP4 PE=1 SV=3	0.0016	0.875
sp|A0A0A0MS15|HV349_HUMAN	A0A0A0MS15	4	6	21	119	13056	Immunoglobulin heavy variable 3-49 OS=Homo sapiens OX=9606 GN=IGHV3-49 PE=3 SV=1	0.0026	0.6218
sp|A0A0C4DH25|KVD20_HUMAN	A0A0C4DH25	4	6	27.6	116	12515	Immunoglobulin kappa variable 3D-20 OS=Homo sapiens OX=9606 GN=IGKV3D-20 PE=3 SV=1	0.0027	0.888
sp|A0A0C4DH41|HV461_HUMAN;sp|P0DP08|HVD82_HUMAN;sp|P0DP06|HVD34_HUMAN;sp|P06331|HV434_HUMAN;sp|P01825|HV459_HUMAN;sp|P01824|HV439_HUMAN	A0A0C4DH41;P0DP08;P0DP06;P06331;P01825;P01824	3	6	26.3	118	13066	Immunoglobulin heavy variable 4-61 OS=Homo sapiens OX=9606 GN=IGHV4-61 PE=1 SV=1	0.0027	0.8323
sp|P01033|TIMP1_HUMAN	P01033	5	6	24.6	207	23171	Metalloproteinase inhibitor 1 OS=Homo sapiens OX=9606 GN=TIMP1 PE=1 SV=1	0.0015	0.762
sp|P01859|IGHG2_HUMAN	P01859	5	6	13.4	395	43806	Immunoglobulin heavy constant gamma 2 OS=Homo sapiens OX=9606 GN=IGHG2 PE=1 SV=3	0.0008	0.3614
sp|P02763|A1AG1_HUMAN	P02763	5	6	16.9	201	23540	Alpha-1-acid glycoprotein 1 OS=Homo sapiens OX=9606 GN=ORM1 PE=1 SV=2	0.0016	0.4757
sp|P02814|SMR3B_HUMAN	P02814	2	6	65.8	79	8188	Submaxillary gland androgen-regulated protein 3B OS=Homo sapiens OX=9606 GN=SMR3B PE=1 SV=2	0.004	3.5499
sp|P06312|KV401_HUMAN	P06312	3	6	19.8	121	13380	Immunoglobulin kappa variable 4-1 OS=Homo sapiens OX=9606 GN=IGKV4-1 PE=1 SV=1	0.0026	0.5776
sp|P35900|K1C20_HUMAN	P35900	4	6	4.5	424	48487	Keratin, type I cytoskeletal 20 OS=Homo sapiens OX=9606 GN=KRT20 PE=1 SV=1	0.0007	0.1092
sp|P59665|DEF1_HUMAN;sp|P59666|DEF3_HUMAN	P59665;P59666	5	6	20.2	94	10201	Neutrophil defensin 1 OS=Homo sapiens OX=9606 GN=DEFA1 PE=1 SV=1	0.0034	0.5922
sp|P62937|PPIA_HUMAN	P62937	6	6	57	165	18012	Peptidyl-prolyl cis-trans isomerase A OS=Homo sapiens OX=9606 GN=PPIA PE=1 SV=2	0.0019	2.7154
sp|Q02818|NUCB1_HUMAN	Q02818	4	6	10	461	53879	Nucleobindin-1 OS=Homo sapiens OX=9606 GN=NUCB1 PE=1 SV=4	0.0007	0.2589
sp|A0A075B6S2|KVD29_HUMAN;sp|A2NJV5|KV229_HUMAN;sp|A0A0A0MRZ7|KVD26_HUMAN	A0A075B6S2;A2NJV5;A0A0A0MRZ7	3	5	16.7	120	13143	Immunoglobulin kappa variable 2D-29 OS=Homo sapiens OX=9606 GN=IGKV2D-29 PE=3 SV=1	0.0022	0.4689
sp|A0A075B6S5|KV127_HUMAN;sp|A0A0C4DH69|KV109_HUMAN;sp|A0A0C4DH67|KV108_HUMAN	A0A075B6S5;A0A0C4DH69;A0A0C4DH67	2	5	18.8	117	12711	Immunoglobulin kappa variable 1-27 OS=Homo sapiens OX=9606 GN=IGKV1-27 PE=3 SV=1	0.0022	0.5417
sp|A0A0B4J1V1|HV321_HUMAN;sp|P01780|HV307_HUMAN;sp|P01763|HV348_HUMAN;sp|P01762|HV311_HUMAN	A0A0B4J1V1;P01780;P01763;P01762	5	5	28.2	117	12840	Immunoglobulin heavy variable 3-21 OS=Homo sapiens OX=9606 GN=IGHV3-21 PE=1 SV=1	0.0022	0.9143
sp|P01602|KV105_HUMAN	P01602	4	5	32.5	117	12782	Immunoglobulin kappa variable 1-5 OS=Homo sapiens OX=9606 GN=IGKV1-5 PE=1 SV=2	0.0022	1.1135
sp|P01624|KV315_HUMAN	P01624	3	5	32.2	115	12496	Immunoglobulin kappa variable 3-15 OS=Homo sapiens OX=9606 GN=IGKV3-15 PE=1 SV=2	0.0023	1.0989
sp|P13987|CD59_HUMAN	P13987	4	5	25.8	128	14177	CD59 glycoprotein OS=Homo sapiens OX=9606 GN=CD59 PE=1 SV=1	0.0021	0.8113
sp|Q15782|CH3L2_HUMAN	Q15782	4	5	12.1	390	43501	Chitinase-3-like protein 2 OS=Homo sapiens OX=9606 GN=CHI3L2 PE=1 SV=1	0.0007	0.3213
sp|Q16630|CPSF6_HUMAN	Q16630	1	5	2	551	59210	Cleavage and polyadenylation specificity factor subunit 6 OS=Homo sapiens OX=9606 GN=CPSF6 PE=1 SV=2	0.0005	0.0471
sp|Q8N1N4|K2C78_HUMAN	Q8N1N4	3	5	5.8	520	56866	Keratin, type II cytoskeletal 78 OS=Homo sapiens OX=9606 GN=KRT78 PE=1 SV=2	0.0005	0.1429
sp|A0A075B6K4|LV310_HUMAN	A0A075B6K4	2	4	16.5	115	12441	Immunoglobulin lambda variable 3-10 OS=Homo sapiens OX=9606 GN=IGLV3-10 PE=3 SV=2	0.0018	0.4622
sp|A0A075B6P5|KV228_HUMAN;sp|P01615|KVD28_HUMAN;sp|P01614|KVD40_HUMAN;sp|A0A087WW87|KV240_HUMAN	A0A075B6P5;P01615;P01614;A0A087WW87	2	4	16.7	120	12957	Immunoglobulin kappa variable 2-28 OS=Homo sapiens OX=9606 GN=IGKV2-28 PE=3 SV=1	0.0017	0.4689
sp|A0A075B6R9|KVD24_HUMAN;sp|A0A0C4DH68|KV224_HUMAN	A0A075B6R9;A0A0C4DH68	3	4	16.7	120	13079	Probable non-functional immunoglobulin kappa variable 2D-24 OS=Homo sapiens OX=9606 GN=IGKV2D-24 PE=1 SV=1	0.0017	0.4689
sp|A0A0A0MRZ8|KVD11_HUMAN;sp|P04433|KV311_HUMAN	A0A0A0MRZ8;P04433	2	4	13.9	115	12625	Immunoglobulin kappa variable 3D-11 OS=Homo sapiens OX=9606 GN=IGKV3D-11 PE=3 SV=6	0.0018	0.3772
sp|A0A0C4DH31|HV118_HUMAN	A0A0C4DH31	3	4	26.5	117	12820	Immunoglobulin heavy variable 1-18 OS=Homo sapiens OX=9606 GN=IGHV1-18 PE=3 SV=1	0.0018	0.8408
sp|A0A0C4DH36|HV338_HUMAN	A0A0C4DH36	3	4	19	116	12759	Probable non-functional immunoglobulin heavy variable 3-38 OS=Homo sapiens OX=9606 GN=IGHV3-38 PE=1 SV=1	0.0018	0.5488
sp|P00751|CFAB_HUMAN	P00751	2	4	2.9	764	85533	Complement factor B OS=Homo sapiens OX=9606 GN=CFB PE=1 SV=2	0.0003	0.0691
sp|P04746|AMYP_HUMAN;sp|P19961|AMY2B_HUMAN;sp|P0DUB6|AMY1A_HUMAN;sp|P0DTE8|AMY1C_HUMAN;sp|P0DTE7|AMY1B_HUMAN	P04746;P19961;P0DUB6;P0DTE8;P0DTE7	3	4	6.8	511	57707	Pancreatic alpha-amylase OS=Homo sapiens OX=9606 GN=AMY2A PE=1 SV=2	0.0004	0.1695
sp|P06310|KV230_HUMAN	P06310	3	4	20	120	13185	Immunoglobulin kappa variable 2-30 OS=Homo sapiens OX=9606 GN=IGKV2-30 PE=3 SV=2	0.0017	0.5849
sp|P0DTE1|HV383_HUMAN	P0DTE1	3	4	19.1	115	12671	Probable non-functional immunoglobulin heavy variable 3-38-3 OS=Homo sapiens OX=9606 GN=IGHV3-38-3 PE=1 SV=1	0.0018	0.5524
sp|P10599|THIO_HUMAN	P10599	2	4	20	105	11737	Thioredoxin OS=Homo sapiens OX=9606 GN=TXN PE=1 SV=3	0.002	0.5849
sp|P22352|GPX3_HUMAN	P22352	3	4	16.4	226	25402	Glutathione peroxidase 3 OS=Homo sapiens OX=9606 GN=GPX3 PE=1 SV=2	0.0009	0.4588
sp|P31749|AKT1_HUMAN;sp|Q9Y243|AKT3_HUMAN;sp|P31751|AKT2_HUMAN	P31749;Q9Y243;P31751	1	4	3.3	480	55686	RAC-alpha serine/threonine-protein kinase OS=Homo sapiens OX=9606 GN=AKT1 PE=1 SV=2	0.0004	0.0789
sp|P31944|CASPE_HUMAN	P31944	2	4	7	242	27680	Caspase-14 OS=Homo sapiens OX=9606 GN=CASP14 PE=1 SV=2	0.0009	0.1749
sp|P81605|DCD_HUMAN	P81605	4	4	23.6	110	11284	Dermcidin OS=Homo sapiens OX=9606 GN=DCD PE=1 SV=2	0.0019	0.7219
sp|Q06830|PRDX1_HUMAN	Q06830	3	4	11.6	199	22110	Peroxiredoxin-1 OS=Homo sapiens OX=9606 GN=PRDX1 PE=1 SV=1	0.0011	0.3062
sp|Q99456|K1C12_HUMAN	Q99456	4	4	5.7	494	53511	Keratin, type I cytoskeletal 12 OS=Homo sapiens OX=9606 GN=KRT12 PE=1 SV=1	0.0004	0.1402
sp|A0A087WSY6|KVD15_HUMAN	A0A087WSY6	3	3	32.2	115	12534	Immunoglobulin kappa variable 3D-15 OS=Homo sapiens OX=9606 GN=IGKV3D-15 PE=3 SV=6	0.0014	1.0989
sp|A6NNZ2|TBB8B_HUMAN;sp|Q9BVA1|TBB2B_HUMAN;sp|Q9BUF5|TBB6_HUMAN;sp|Q3ZCM7|TBB8_HUMAN;sp|Q13885|TBB2A_HUMAN;sp|P68371|TBB4B_HUMAN;sp|P07437|TBB5_HUMAN;sp|P04350|TBB4A_HUMAN	A6NNZ2;Q9BVA1;Q9BUF5;Q3ZCM7;Q13885;P68371;P07437;P04350	2	3	5.4	444	49573	Tubulin beta 8B OS=Homo sapiens OX=9606 GN=TUBB8B PE=1 SV=1	0.0004	0.1324
sp|O00391|QSOX1_HUMAN	O00391	2	3	5	747	82578	Sulfhydryl oxidase 1 OS=Homo sapiens OX=9606 GN=QSOX1 PE=1 SV=3	0.0002	0.122
sp|O00584|RNT2_HUMAN	O00584	2	3	9.4	256	29481	Ribonuclease T2 OS=Homo sapiens OX=9606 GN=RNASET2 PE=1 SV=2	0.0006	0.2417
sp|P01709|LV208_HUMAN	P01709	2	3	17.8	118	12382	Immunoglobulin lambda variable 2-8 OS=Homo sapiens OX=9606 GN=IGLV2-8 PE=1 SV=2	0.0013	0.5066
sp|P02774|VTDB_HUMAN	P02774	2	3	6.1	474	52918	Vitamin D-binding protein OS=Homo sapiens OX=9606 GN=GC PE=1 SV=2	0.0003	0.1508
sp|P05109|S10A8_HUMAN	P05109	3	3	23.7	93	10834	Protein S100-A8 OS=Homo sapiens OX=9606 GN=S100A8 PE=1 SV=1	0.0017	0.7258
sp|P14923|PLAK_HUMAN	P14923	3	3	5.6	745	81745	Junction plakoglobin OS=Homo sapiens OX=9606 GN=JUP PE=1 SV=3	0.0002	0.1376
sp|P28799|GRN_HUMAN	P28799	2	3	5.2	593	63545	Progranulin OS=Homo sapiens OX=9606 GN=GRN PE=1 SV=2	0.0003	0.1272
sp|P31151|S10A7_HUMAN	P31151	3	3	13.9	101	11471	Protein S100-A7 OS=Homo sapiens OX=9606 GN=S100A7 PE=1 SV=4	0.0016	0.3772
sp|P62805|H4_HUMAN	P62805	3	3	34	103	11367	Histone H4 OS=Homo sapiens OX=9606 GN=H4C1 PE=1 SV=2	0.0015	1.1878
sp|P68104|EF1A1_HUMAN;sp|Q5VTE0|EF1A3_HUMAN	P68104;Q5VTE0	3	3	10.2	462	50141	Elongation factor 1-alpha 1 OS=Homo sapiens OX=9606 GN=EEF1A1 PE=1 SV=1	0.0003	0.2647
sp|P68431|H31_HUMAN;sp|Q71DI3|H32_HUMAN;sp|Q16695|H31T_HUMAN;sp|P84243|H33_HUMAN	P68431;Q71DI3;Q16695;P84243	2	3	13.2	136	15404	Histone H3.1 OS=Homo sapiens OX=9606 GN=H3C1 PE=1 SV=2	0.0012	0.3552
sp|P98088|MUC5A_HUMAN	P98088	2	3	1.1	5654	585574	Mucin-5AC OS=Homo sapiens OX=9606 GN=MUC5AC PE=1 SV=4	0	0.0257
sp|Q01469|FABP5_HUMAN	Q01469	2	3	23	135	15164	Fatty acid-binding protein 5 OS=Homo sapiens OX=9606 GN=FABP5 PE=1 SV=3	0.0012	0.6982
sp|Q02413|DSG1_HUMAN	Q02413	2	3	2.1	1049	113748	Desmoglein-1 OS=Homo sapiens OX=9606 GN=DSG1 PE=1 SV=2	0.0002	0.0495
sp|Q5D862|FILA2_HUMAN	Q5D862	2	3	1	2391	248072	Filaggrin-2 OS=Homo sapiens OX=9606 GN=FLG2 PE=1 SV=1	0.0001	0.0233
sp|Q6MZM9|PRR27_HUMAN	Q6MZM9	3	3	23.7	219	22720	Proline-rich protein 27 OS=Homo sapiens OX=9606 GN=PRR27 PE=2 SV=1	0.0007	0.7258
sp|Q92743|HTRA1_HUMAN	Q92743	3	3	7.3	480	51287	Serine protease HTRA1 OS=Homo sapiens OX=9606 GN=HTRA1 PE=1 SV=1	0.0003	0.183
sp|Q9UJF2|NGAP_HUMAN	Q9UJF2	1	3	1.2	1139	128557	Ras GTPase-activating protein nGAP OS=Homo sapiens OX=9606 GN=RASAL2 PE=1 SV=2	0.0001	0.028
sp|A0A075B6K5|LV39_HUMAN;sp|P80748|LV321_HUMAN	A0A075B6K5;P80748	1	2	13.9	115	12332	Immunoglobulin lambda variable 3-9 OS=Homo sapiens OX=9606 GN=IGLV3-9 PE=3 SV=1	0.0009	0.3772
sp|A0A0B4J2H0|HV69D_HUMAN;sp|P0DP01|HV108_HUMAN;sp|P01743|HV146_HUMAN;sp|P01742|HV169_HUMAN;sp|A0A0C4DH29|HV103_HUMAN	A0A0B4J2H0;P0DP01;P01743;P01742;A0A0C4DH29	1	2	9.4	117	12660	Immunoglobulin heavy variable 1-69D OS=Homo sapiens OX=9606 GN=IGHV1-69D PE=1 SV=1	0.0009	0.2417
sp|A0A0J9YXX1|HV5X1_HUMAN	A0A0J9YXX1	2	2	15.4	117	12773	Immunoglobulin heavy variable 5-10-1 OS=Homo sapiens OX=9606 GN=IGHV5-10-1 PE=3 SV=1	0.0009	0.4256
sp|O43609|SPY1_HUMAN	O43609	2	2	7.8	319	35122	Protein sprouty homolog 1 OS=Homo sapiens OX=9606 GN=SPRY1 PE=1 SV=2	0.0003	0.1967
sp|O43653|PSCA_HUMAN	O43653	1	2	8.8	114	11959	Prostate stem cell antigen OS=Homo sapiens OX=9606 GN=PSCA PE=1 SV=2	0.0009	0.2246
sp|O60814|H2B1K_HUMAN;sp|Q99880|H2B1L_HUMAN;sp|Q99879|H2B1M_HUMAN;sp|Q99877|H2B1N_HUMAN;sp|Q93079|H2B1H_HUMAN;sp|Q8N257|H2B3B_HUMAN;sp|Q5QNW6|H2B2F_HUMAN;sp|Q16778|H2B2E_HUMAN;sp|P62807|H2B1C_HUMAN;sp|P58876|H2B1D_HUMAN;sp|P57053|H2BFS_HUMAN;sp|P33778|H2B1B_HUMAN;sp|P23527|H2B1O_HUMAN;sp|P06899|H2B1J_HUMAN	O60814;Q99880;Q99879;Q99877;Q93079;Q8N257;Q5QNW6;Q16778;P62807;P58876;P57053;P33778;P23527;P06899	2	2	19	126	13890	Histone H2B type 1-K OS=Homo sapiens OX=9606 GN=H2BC12 PE=1 SV=3	0.0008	0.5488
sp|O60888|CUTA_HUMAN	O60888	1	2	7.8	179	19116	Protein CutA OS=Homo sapiens OX=9606 GN=CUTA PE=1 SV=2	0.0006	0.1967
sp|P01704|LV214_HUMAN	P01704	1	2	13.3	120	12597	Immunoglobulin lambda variable 2-14 OS=Homo sapiens OX=9606 GN=IGLV2-14 PE=1 SV=2	0.0009	0.3583
sp|P02652|APOA2_HUMAN	P02652	1	2	10	100	11175	Apolipoprotein A-II OS=Homo sapiens OX=9606 GN=APOA2 PE=1 SV=1	0.001	0.2589
sp|P05090|APOD_HUMAN	P05090	2	2	13.8	189	21276	Apolipoprotein D OS=Homo sapiens OX=9606 GN=APOD PE=1 SV=1	0.0006	0.374
sp|P06703|S10A6_HUMAN	P06703	2	2	25.6	90	10180	Protein S100-A6 OS=Homo sapiens OX=9606 GN=S100A6 PE=1 SV=1	0.0012	0.803
sp|P06733|ENOA_HUMAN;sp|P13929|ENOB_HUMAN	P06733;P13929	1	2	3.5	434	47169	Alpha-enolase OS=Homo sapiens OX=9606 GN=ENO1 PE=1 SV=2	0.0002	0.0839
sp|P07738|PMGE_HUMAN	P07738	1	2	5	259	30005	Bisphosphoglycerate mutase OS=Homo sapiens OX=9606 GN=BPGM PE=1 SV=2	0.0004	0.122
sp|P08571|CD14_HUMAN	P08571	2	2	9.9	375	40076	Monocyte differentiation antigen CD14 OS=Homo sapiens OX=9606 GN=CD14 PE=1 SV=2	0.0003	0.256
sp|P08582|TRFM_HUMAN	P08582	1	2	1.8	738	80215	Melanotransferrin OS=Homo sapiens OX=9606 GN=MELTF PE=1 SV=2	0.0001	0.0423
sp|P08603|CFAH_HUMAN	P08603	2	2	1.8	1231	139096	Complement factor H OS=Homo sapiens OX=9606 GN=CFH PE=1 SV=4	0.0001	0.0423
sp|P09211|GSTP1_HUMAN	P09211	2	2	17.1	210	23356	Glutathione S-transferase P OS=Homo sapiens OX=9606 GN=GSTP1 PE=1 SV=2	0.0005	0.4825
sp|P0DJI8|SAA1_HUMAN	P0DJI8	2	2	27.9	122	13532	Serum amyloid A-1 protein OS=Homo sapiens OX=9606 GN=SAA1 PE=1 SV=1	0.0009	0.9011
sp|Q16651|PRSS8_HUMAN	Q16651	1	2	5.5	343	36431	Prostasin OS=Homo sapiens OX=9606 GN=PRSS8 PE=1 SV=1	0.0003	0.135
sp|Q7RTW8|OTOAN_HUMAN	Q7RTW8	2	2	1	1153	128532	Otoancorin OS=Homo sapiens OX=9606 GN=OTOA PE=1 SV=1	0.0001	0.0233
sp|Q8WXG9|AGRV1_HUMAN	Q8WXG9	1	2	0.1	6306	693082	Adhesion G-protein coupled receptor V1 OS=Homo sapiens OX=9606 GN=ADGRV1 PE=1 SV=2	0	0.0023
sp|Q96DR8|MUCL1_HUMAN	Q96DR8	1	2	10	90	9039	Mucin-like protein 1 OS=Homo sapiens OX=9606 GN=MUCL1 PE=1 SV=1	0.0012	0.2589
sp|Q96LB3|IFT74_HUMAN	Q96LB3	1	2	2.5	600	69239	Intraflagellar transport protein 74 homolog OS=Homo sapiens OX=9606 GN=IFT74 PE=1 SV=1	0.0002	0.0593
sp|A0A0C4DH35|HV335_HUMAN	A0A0C4DH35	1	1	9.4	117	12810	Probable non-functional immunoglobulin heavy variable 3-35 OS=Homo sapiens OX=9606 GN=IGHV3-35 PE=1 SV=1	0.0004	0.2417
sp|O00299|CLIC1_HUMAN	O00299	1	1	7.5	241	26923	Chloride intracellular channel protein 1 OS=Homo sapiens OX=9606 GN=CLIC1 PE=1 SV=4	0.0002	0.1885
sp|P01593|KVD33_HUMAN;sp|P01594|KV133_HUMAN	P01593;P01594	1	1	13.7	117	12848	Immunoglobulin kappa variable 1D-33 OS=Homo sapiens OX=9606 GN=IGKV1D-33 PE=1 SV=2	0.0004	0.3709
sp|P01700|LV147_HUMAN	P01700	1	1	11.1	117	12284	Immunoglobulin lambda variable 1-47 OS=Homo sapiens OX=9606 GN=IGLV1-47 PE=1 SV=2	0.0004	0.2912
sp|P02656|APOC3_HUMAN	P02656	1	1	16.2	99	10852	Apolipoprotein C-III OS=Homo sapiens OX=9606 GN=APOC3 PE=1 SV=1	0.0005	0.4521
sp|P04075|ALDOA_HUMAN	P04075	1	1	5.5	364	39420	Fructose-bisphosphate aldolase A OS=Homo sapiens OX=9606 GN=ALDOA PE=1 SV=2	0.0001	0.135
sp|P08311|CATG_HUMAN	P08311	1	1	3.5	255	28837	Cathepsin G OS=Homo sapiens OX=9606 GN=CTSG PE=1 SV=2	0.0002	0.0839
sp|P0DMV8|HS71A_HUMAN;sp|P17066|HSP76_HUMAN;sp|P0DMV9|HS71B_HUMAN	P0DMV8;P17066;P0DMV9	1	1	2.5	641	70052	Heat shock 70 kDa protein 1A OS=Homo sapiens OX=9606 GN=HSPA1A PE=1 SV=1	0.0001	0.0593
sp|P12109|CO6A1_HUMAN	P12109	1	1	2.3	1028	108529	Collagen alpha-1(VI) chain OS=Homo sapiens OX=9606 GN=COL6A1 PE=1 SV=3	0.0001	0.0544
sp|P15328|FOLR1_HUMAN	P15328	1	1	5.4	257	29819	Folate receptor alpha OS=Homo sapiens OX=9606 GN=FOLR1 PE=1 SV=3	0.0002	0.1324
sp|P19113|DCHS_HUMAN	P19113	1	1	1.7	662	74141	Histidine decarboxylase OS=Homo sapiens OX=9606 GN=HDC PE=1 SV=2	0.0001	0.0399
sp|P21926|CD9_HUMAN	P21926	1	1	4.4	228	25416	CD9 antigen OS=Homo sapiens OX=9606 GN=CD9 PE=1 SV=4	0.0002	0.1066
sp|P28749|RBL1_HUMAN	P28749	1	1	1.1	1068	120847	Retinoblastoma-like protein 1 OS=Homo sapiens OX=9606 GN=RBL1 PE=1 SV=3	0	0.0257
sp|P31949|S10AB_HUMAN	P31949	1	1	10.5	105	11740	Protein S100-A11 OS=Homo sapiens OX=9606 GN=S100A11 PE=1 SV=2	0.0005	0.2735
sp|P60174|TPIS_HUMAN	P60174	1	1	6	249	26669	Triosephosphate isomerase OS=Homo sapiens OX=9606 GN=TPI1 PE=1 SV=4	0.0002	0.1482
sp|P61916|NPC2_HUMAN	P61916	1	1	11.9	151	16570	NPC intracellular cholesterol transporter 2 OS=Homo sapiens OX=9606 GN=NPC2 PE=1 SV=1	0.0003	0.3152
sp|P69905|HBA_HUMAN	P69905	1	1	8.5	142	15258	Hemoglobin subunit alpha OS=Homo sapiens OX=9606 GN=HBA1 PE=1 SV=2	0.0004	0.2162
sp|Q13217|DNJC3_HUMAN	Q13217	1	1	3.4	504	57580	DnaJ homolog subfamily C member 3 OS=Homo sapiens OX=9606 GN=DNAJC3 PE=1 SV=1	0.0001	0.0814
sp|Q14508|WFDC2_HUMAN	Q14508	1	1	11.3	124	12993	WAP four-disulfide core domain protein 2 OS=Homo sapiens OX=9606 GN=WFDC2 PE=1 SV=2	0.0004	0.2972
sp|Q14690|RRP5_HUMAN	Q14690	1	1	0.5	1871	208699	Protein RRP5 homolog OS=Homo sapiens OX=9606 GN=PDCD11 PE=1 SV=3	0	0.0116
sp|Q15582|BGH3_HUMAN	Q15582	1	1	2.8	683	74681	Transforming growth factor-beta-induced protein ig-h3 OS=Homo sapiens OX=9606 GN=TGFBI PE=1 SV=1	0.0001	0.0666
sp|Q6NUJ1|SAPL1_HUMAN	Q6NUJ1	1	1	2.1	521	56627	Proactivator polypeptide-like 1 OS=Homo sapiens OX=9606 GN=PSAPL1 PE=2 SV=2	0.0001	0.0495
sp|Q96BQ1|FAM3D_HUMAN	Q96BQ1	1	1	8	224	24963	Protein FAM3D OS=Homo sapiens OX=9606 GN=FAM3D PE=1 SV=1	0.0002	0.2023
sp|Q96EU7|C1GLC_HUMAN	Q96EU7	1	1	3.5	318	36382	C1GALT1-specific chaperone 1 OS=Homo sapiens OX=9606 GN=C1GALT1C1 PE=1 SV=1	0.0002	0.0839
sp|Q9BZ23|PANK2_HUMAN	Q9BZ23	1	1	2.5	570	62681	Pantothenate kinase 2, mitochondrial OS=Homo sapiens OX=9606 GN=PANK2 PE=1 SV=3	0.0001	0.0593
sp|Q9NRJ3|CCL28_HUMAN	Q9NRJ3	1	1	11.8	127	14280	C-C motif chemokine 28 OS=Homo sapiens OX=9606 GN=CCL28 PE=1 SV=1	0.0004	0.3122
sp|Q9P127|LUZP4_HUMAN	Q9P127	1	1	3.2	313	35937	Leucine zipper protein 4 OS=Homo sapiens OX=9606 GN=LUZP4 PE=1 SV=1	0.0002	0.0765
sp|Q9UBG3|CRNN_HUMAN	Q9UBG3	1	1	3.2	495	53533	Cornulin OS=Homo sapiens OX=9606 GN=CRNN PE=1 SV=1	0.0001	0.0765

## Sheet: 7) 200ng-44min#1(220)
Protein Group Name	Protein Accession	Number Stripped Peptides	Number PSMs	Protein Coverage	Protein Length	Protein Molecular Weight	Protein Description	NSAF Score	EmPAI Score
sp|P02788|TRFL_HUMAN	P02788	188	1115	88.6	710	78182	Lactotransferrin OS=Homo sapiens OX=9606 GN=LTF PE=1 SV=6	0.0555	6.6913
sp|P61626|LYSC_HUMAN	P61626	55	337	87.2	148	16537	Lysozyme C OS=Homo sapiens OX=9606 GN=LYZ PE=1 SV=1	0.0804	6.4473
sp|P31025|LCN1_HUMAN	P31025	55	285	78.4	176	19250	Lipocalin-1 OS=Homo sapiens OX=9606 GN=LCN1 PE=1 SV=1	0.0572	5.0814
sp|P12273|PIP_HUMAN	P12273	31	270	77.4	146	16572	Prolactin-inducible protein OS=Homo sapiens OX=9606 GN=PIP PE=1 SV=1	0.0653	4.9429
sp|P01833|PIGR_HUMAN	P01833	88	253	60.5	764	83284	Polymeric immunoglobulin receptor OS=Homo sapiens OX=9606 GN=PIGR PE=1 SV=4	0.0117	3.0272
sp|P01876|IGHA1_HUMAN	P01876	41	250	62.3	398	42849	Immunoglobulin heavy constant alpha 1 OS=Homo sapiens OX=9606 GN=IGHA1 PE=1 SV=3	0.0222	3.1976
sp|P02768|ALBU_HUMAN	P02768	112	238	90.1	609	69367	Albumin OS=Homo sapiens OX=9606 GN=ALB PE=1 SV=2	0.0138	6.9616
sp|P04264|K2C1_HUMAN	P04264	72	184	64.1	644	66039	Keratin, type II cytoskeletal 1 OS=Homo sapiens OX=9606 GN=KRT1 PE=1 SV=6	0.0101	3.3752
sp|P25311|ZA2G_HUMAN	P25311	50	184	64.8	298	34259	Zinc-alpha-2-glycoprotein OS=Homo sapiens OX=9606 GN=AZGP1 PE=1 SV=2	0.0218	3.4463
sp|P0DOX2|IGA2_HUMAN	P0DOX2	23	150	38.9	455	48934	Immunoglobulin alpha-2 heavy chain OS=Homo sapiens OX=9606 PE=1 SV=2	0.0116	1.4491
sp|P01024|CO3_HUMAN	P01024	92	146	46.3	1663	187147	Complement C3 OS=Homo sapiens OX=9606 GN=C3 PE=1 SV=2	0.0031	1.904
sp|P01877|IGHA2_HUMAN	P01877	18	136	31.5	391	42334	Immunoglobulin heavy constant alpha 2 OS=Homo sapiens OX=9606 GN=IGHA2 PE=1 SV=5	0.0123	1.0654
sp|P01834|IGKC_HUMAN	P01834	21	131	97.2	107	11765	Immunoglobulin kappa constant OS=Homo sapiens OX=9606 GN=IGKC PE=1 SV=2	0.0432	8.3756
sp|O75556|SG2A1_HUMAN	O75556	31	127	75.8	95	10884	Mammaglobin-B OS=Homo sapiens OX=9606 GN=SCGB2A1 PE=1 SV=1	0.0472	4.728
sp|Q9UGM3|DMBT1_HUMAN	Q9UGM3	48	121	42	2413	260734	Deleted in malignant brain tumors 1 protein OS=Homo sapiens OX=9606 GN=DMBT1 PE=1 SV=2	0.0018	1.6303
sp|Q9GZZ8|LACRT_HUMAN	Q9GZZ8	23	118	43.5	138	14246	Extracellular glycoprotein lacritin OS=Homo sapiens OX=9606 GN=LACRT PE=1 SV=1	0.0302	1.7227
sp|P98160|PGBM_HUMAN	P98160	78	115	21	4391	468835	Basement membrane-specific heparan sulfate proteoglycan core protein OS=Homo sapiens OX=9606 GN=HSPG2 PE=1 SV=4	0.0009	0.6218
sp|P01036|CYTS_HUMAN	P01036	27	113	73.8	141	16214	Cystatin-S OS=Homo sapiens OX=9606 GN=CST4 PE=1 SV=3	0.0283	4.4702
sp|P35527|K1C9_HUMAN	P35527	55	112	66	623	62064	Keratin, type I cytoskeletal 9 OS=Homo sapiens OX=9606 GN=KRT9 PE=1 SV=3	0.0063	3.5709
sp|P13645|K1C10_HUMAN	P13645	53	111	66.6	584	58827	Keratin, type I cytoskeletal 10 OS=Homo sapiens OX=9606 GN=KRT10 PE=1 SV=6	0.0067	3.6345
sp|Q16378|PROL4_HUMAN	Q16378	15	109	37.3	134	15097	Proline-rich protein 4 OS=Homo sapiens OX=9606 GN=PRR4 PE=1 SV=3	0.0287	1.3605
sp|P0DOX7|IGK_HUMAN	P0DOX7	20	101	65	214	23379	Immunoglobulin kappa light chain OS=Homo sapiens OX=9606 PE=1 SV=1	0.0167	3.4668
sp|P35908|K22E_HUMAN	P35908	59	100	71.4	639	65433	Keratin, type II cytoskeletal 2 epidermal OS=Homo sapiens OX=9606 GN=KRT2 PE=1 SV=2	0.0055	4.1761
sp|P13647|K2C5_HUMAN	P13647	57	96	61	590	62378	Keratin, type II cytoskeletal 5 OS=Homo sapiens OX=9606 GN=KRT5 PE=1 SV=3	0.0057	3.0738
sp|Q99935|PROL1_HUMAN	Q99935	11	96	31.9	248	27216	Opiorphin prepropeptide OS=Homo sapiens OX=9606 GN=OPRPN PE=1 SV=2	0.0137	1.0845
sp|P0DOY3|IGLC3_HUMAN	P0DOY3	19	89	93.4	106	11266	Immunoglobulin lambda constant 3 OS=Homo sapiens OX=9606 GN=IGLC3 PE=1 SV=1	0.0296	7.5901
sp|B9A064|IGLL5_HUMAN;sp|P0DOX8|IGL1_HUMAN	B9A064;P0DOX8	16	72	50	214	23063	Immunoglobulin lambda-like polypeptide 5 OS=Homo sapiens OX=9606 GN=IGLL5 PE=1 SV=2	0.0119	2.1623
sp|P02538|K2C6A_HUMAN	P02538	52	72	56	564	60045	Keratin, type II cytoskeletal 6A OS=Homo sapiens OX=9606 GN=KRT6A PE=1 SV=3	0.0045	2.6308
sp|P01591|IGJ_HUMAN	P01591	21	71	69.8	159	18099	Immunoglobulin J chain OS=Homo sapiens OX=9606 GN=JCHAIN PE=1 SV=4	0.0158	3.9888
sp|P13646|K1C13_HUMAN	P13646	37	71	60.7	458	49588	Keratin, type I cytoskeletal 13 OS=Homo sapiens OX=9606 GN=KRT13 PE=1 SV=4	0.0055	3.0458
sp|P48668|K2C6C_HUMAN	P48668	50	70	54.3	564	60025	Keratin, type II cytoskeletal 6C OS=Homo sapiens OX=9606 GN=KRT6C PE=1 SV=3	0.0044	2.4914
sp|P01037|CYTN_HUMAN	P01037	17	69	67.4	141	16388	Cystatin-SN OS=Homo sapiens OX=9606 GN=CST1 PE=1 SV=3	0.0173	3.7206
sp|P04259|K2C6B_HUMAN	P04259	46	69	49.6	564	60067	Keratin, type II cytoskeletal 6B OS=Homo sapiens OX=9606 GN=KRT6B PE=1 SV=5	0.0043	2.1333
sp|Q13421|MSLN_HUMAN	Q13421	29	63	43	630	68986	Mesothelin OS=Homo sapiens OX=9606 GN=MSLN PE=1 SV=2	0.0035	1.6915
sp|O95968|SG1D1_HUMAN	O95968	20	61	46.7	90	9898	Secretoglobin family 1D member 1 OS=Homo sapiens OX=9606 GN=SCGB1D1 PE=1 SV=1	0.0239	1.9309
sp|P01871|IGHM_HUMAN	P01871	23	58	38.6	474	51924	Immunoglobulin heavy constant mu OS=Homo sapiens OX=9606 GN=IGHM PE=1 SV=5	0.0043	1.4322
sp|P02533|K1C14_HUMAN	P02533	38	58	62.5	472	51561	Keratin, type I cytoskeletal 14 OS=Homo sapiens OX=9606 GN=KRT14 PE=1 SV=4	0.0043	3.217
sp|P10909|CLUS_HUMAN	P10909	29	53	37.2	449	52495	Clusterin OS=Homo sapiens OX=9606 GN=CLU PE=1 SV=1	0.0042	1.355
sp|P22079|PERL_HUMAN	P22079	31	46	43.4	712	80288	Lactoperoxidase OS=Homo sapiens OX=9606 GN=LPO PE=1 SV=2	0.0023	1.7164
sp|Q08380|LG3BP_HUMAN	Q08380	24	44	36.8	585	65331	Galectin-3-binding protein OS=Homo sapiens OX=9606 GN=LGALS3BP PE=1 SV=1	0.0027	1.3335
sp|P14555|PA2GA_HUMAN	P14555	18	43	58.3	144	16083	Phospholipase A2, membrane associated OS=Homo sapiens OX=9606 GN=PLA2G2A PE=1 SV=2	0.0105	2.8282
sp|P08779|K1C16_HUMAN	P08779	24	41	31.3	473	51268	Keratin, type I cytoskeletal 16 OS=Homo sapiens OX=9606 GN=KRT16 PE=1 SV=4	0.0031	1.0559
sp|P61769|B2MG_HUMAN	P61769	15	41	78.2	119	13715	Beta-2-microglobulin OS=Homo sapiens OX=9606 GN=B2M PE=1 SV=1	0.0122	5.0534
sp|P19013|K2C4_HUMAN	P19013	25	39	44.4	520	56144	Keratin, type II cytoskeletal 4 OS=Homo sapiens OX=9606 GN=KRT4 PE=1 SV=5	0.0026	1.7797
sp|P02787|TRFE_HUMAN	P02787	26	36	42.1	698	77050	Serotransferrin OS=Homo sapiens OX=9606 GN=TF PE=1 SV=4	0.0018	1.6363
sp|P00738|HPT_HUMAN	P00738	24	35	47.3	406	45205	Haptoglobin OS=Homo sapiens OX=9606 GN=HP PE=1 SV=1	0.003	1.9717
sp|P60709|ACTB_HUMAN;sp|P63261|ACTG_HUMAN	P60709;P63261	20	35	42.9	375	41737	Actin, cytoplasmic 1 OS=Homo sapiens OX=9606 GN=ACTB PE=1 SV=1	0.0033	1.6853
sp|P08727|K1C19_HUMAN	P08727	19	34	46	400	44106	Keratin, type I cytoskeletal 19 OS=Homo sapiens OX=9606 GN=KRT19 PE=1 SV=4	0.003	1.884
sp|P19012|K1C15_HUMAN	P19012	17	33	23	456	49212	Keratin, type I cytoskeletal 15 OS=Homo sapiens OX=9606 GN=KRT15 PE=1 SV=3	0.0026	0.6982
sp|P03973|SLPI_HUMAN	P03973	16	32	75	132	14326	Antileukoproteinase OS=Homo sapiens OX=9606 GN=SLPI PE=1 SV=2	0.0086	4.6234
sp|Q04695|K1C17_HUMAN	Q04695	21	32	30.6	432	48106	Keratin, type I cytoskeletal 17 OS=Homo sapiens OX=9606 GN=KRT17 PE=1 SV=2	0.0026	1.023
sp|P06396|GELS_HUMAN	P06396	17	31	29	782	85697	Gelsolin OS=Homo sapiens OX=9606 GN=GSN PE=1 SV=1	0.0014	0.9498
sp|P80188|NGAL_HUMAN	P80188	15	31	69.2	198	22588	Neutrophil gelatinase-associated lipocalin OS=Homo sapiens OX=9606 GN=LCN2 PE=1 SV=2	0.0055	3.9204
sp|P12035|K2C3_HUMAN	P12035	21	29	14.2	628	64417	Keratin, type II cytoskeletal 3 OS=Homo sapiens OX=9606 GN=KRT3 PE=1 SV=3	0.0016	0.3868
sp|P00450|CERU_HUMAN	P00450	20	27	25.8	1065	122205	Ceruloplasmin OS=Homo sapiens OX=9606 GN=CP PE=1 SV=1	0.0009	0.8113
sp|Q01546|K22O_HUMAN	Q01546	19	26	11.9	638	65841	Keratin, type II cytoskeletal 2 oral OS=Homo sapiens OX=9606 GN=KRT76 PE=1 SV=2	0.0014	0.3152
sp|Q8N474|SFRP1_HUMAN	Q8N474	13	26	29.3	314	35386	Secreted frizzled-related protein 1 OS=Homo sapiens OX=9606 GN=SFRP1 PE=1 SV=1	0.0029	0.9634
sp|P07858|CATB_HUMAN	P07858	14	25	30.7	339	37822	Cathepsin B OS=Homo sapiens OX=9606 GN=CTSB PE=1 SV=3	0.0026	1.0277
sp|Q5XKE5|K2C79_HUMAN	Q5XKE5	17	24	14.8	535	57836	Keratin, type II cytoskeletal 79 OS=Homo sapiens OX=9606 GN=KRT79 PE=1 SV=2	0.0016	0.406
sp|A0A0B4J1V0|HV315_HUMAN	A0A0B4J1V0	8	21	46.2	119	12926	Immunoglobulin heavy variable 3-15 OS=Homo sapiens OX=9606 GN=IGHV3-15 PE=3 SV=1	0.0062	1.8973
sp|P0DOX5|IGG1_HUMAN	P0DOX5	12	21	29.4	449	49329	Immunoglobulin gamma-1 heavy chain OS=Homo sapiens OX=9606 PE=1 SV=2	0.0017	0.9679
sp|A0A0B4J1Y9|HV372_HUMAN	A0A0B4J1Y9	8	20	44.5	119	13203	Immunoglobulin heavy variable 3-72 OS=Homo sapiens OX=9606 GN=IGHV3-72 PE=3 SV=1	0.0059	1.7861
sp|P20061|TCO1_HUMAN	P20061	14	20	30.3	433	48207	Transcobalamin-1 OS=Homo sapiens OX=9606 GN=TCN1 PE=1 SV=2	0.0016	1.0091
sp|A0A0B4J1X5|HV374_HUMAN	A0A0B4J1X5	10	19	54.7	117	12840	Immunoglobulin heavy variable 3-74 OS=Homo sapiens OX=9606 GN=IGHV3-74 PE=3 SV=1	0.0057	2.5237
sp|P01772|HV333_HUMAN;sp|P0DP02|HVC33_HUMAN	P01772;P0DP02	8	19	34.2	117	13074	Immunoglobulin heavy variable 3-33 OS=Homo sapiens OX=9606 GN=IGHV3-33 PE=1 SV=2	0.0057	1.1979
sp|P01780|HV307_HUMAN	P01780	11	19	41.9	117	12943	Immunoglobulin heavy variable 3-7 OS=Homo sapiens OX=9606 GN=IGHV3-7 PE=1 SV=2	0.0057	1.6242
sp|P01768|HV330_HUMAN;sp|P0DP03|HVC05_HUMAN	P01768;P0DP03	8	18	34.2	117	12947	Immunoglobulin heavy variable 3-30 OS=Homo sapiens OX=9606 GN=IGHV3-30 PE=1 SV=2	0.0054	1.1979
sp|P01782|HV309_HUMAN	P01782	7	18	44.1	118	12945	Immunoglobulin heavy variable 3-9 OS=Homo sapiens OX=9606 GN=IGHV3-9 PE=1 SV=2	0.0054	1.7606
sp|P06702|S10A9_HUMAN	P06702	9	18	43	114	13242	Protein S100-A9 OS=Homo sapiens OX=9606 GN=S100A9 PE=1 SV=1	0.0056	1.6915
sp|P01764|HV323_HUMAN	P01764	8	17	44.4	117	12582	Immunoglobulin heavy variable 3-23 OS=Homo sapiens OX=9606 GN=IGHV3-23 PE=1 SV=2	0.0051	1.7797
sp|P02647|APOA1_HUMAN	P02647	14	17	43.4	267	30778	Apolipoprotein A-I OS=Homo sapiens OX=9606 GN=APOA1 PE=1 SV=1	0.0022	1.7164
sp|P0DP04|HV43D_HUMAN	P0DP04	6	17	44.1	118	13017	Immunoglobulin heavy variable 3-43D OS=Homo sapiens OX=9606 GN=IGHV3-43D PE=3 SV=1	0.0051	1.7606
sp|P80303|NUCB2_HUMAN	P80303	13	17	25.5	420	50223	Nucleobindin-2 OS=Homo sapiens OX=9606 GN=NUCB2 PE=1 SV=3	0.0014	0.7989
sp|Q86Y46|K2C73_HUMAN	Q86Y46	11	17	10.7	540	58923	Keratin, type II cytoskeletal 73 OS=Homo sapiens OX=9606 GN=KRT73 PE=1 SV=1	0.0011	0.2794
sp|P01034|CYTC_HUMAN	P01034	8	16	48.6	146	15799	Cystatin-C OS=Homo sapiens OX=9606 GN=CST3 PE=1 SV=1	0.0039	2.062
sp|P05787|K2C8_HUMAN	P05787	12	16	8.7	483	53704	Keratin, type II cytoskeletal 8 OS=Homo sapiens OX=9606 GN=KRT8 PE=1 SV=7	0.0012	0.2218
sp|A0A0A0MS15|HV349_HUMAN	A0A0A0MS15	6	15	31.9	119	13056	Immunoglobulin heavy variable 3-49 OS=Homo sapiens OX=9606 GN=IGHV3-49 PE=3 SV=1	0.0045	1.0845
sp|Q7Z794|K2C1B_HUMAN	Q7Z794	6	15	7.1	578	61901	Keratin, type II cytoskeletal 1b OS=Homo sapiens OX=9606 GN=KRT77 PE=1 SV=3	0.0009	0.1776
sp|P04083|ANXA1_HUMAN	P04083	11	14	34.1	346	38714	Annexin A1 OS=Homo sapiens OX=9606 GN=ANXA1 PE=1 SV=2	0.0014	1.1928
sp|P04406|G3P_HUMAN	P04406	10	13	37.6	335	36053	Glyceraldehyde-3-phosphate dehydrogenase OS=Homo sapiens OX=9606 GN=GAPDH PE=1 SV=3	0.0014	1.3768
sp|P01860|IGHG3_HUMAN	P01860	7	12	15.7	446	49093	Immunoglobulin heavy constant gamma 3 OS=Homo sapiens OX=9606 GN=IGHG3 PE=1 SV=3	0.001	0.4355
sp|P07355|ANXA2_HUMAN	P07355	9	12	34.5	339	38604	Annexin A2 OS=Homo sapiens OX=9606 GN=ANXA2 PE=1 SV=2	0.0012	1.2131
sp|P34096|RNAS4_HUMAN	P34096	7	12	43.5	147	16840	Ribonuclease 4 OS=Homo sapiens OX=9606 GN=RNASE4 PE=1 SV=3	0.0029	1.7227
sp|P49788|TIG1_HUMAN	P49788	7	12	17	294	33285	Retinoic acid receptor responder protein 1 OS=Homo sapiens OX=9606 GN=RARRES1 PE=1 SV=2	0.0014	0.4791
sp|Q6UXB2|CXL17_HUMAN	Q6UXB2	7	12	39.5	119	13819	C-X-C motif chemokine 17 OS=Homo sapiens OX=9606 GN=CXCL17 PE=1 SV=1	0.0036	1.4831
sp|Q96DA0|ZG16B_HUMAN	Q96DA0	8	12	22.6	208	22739	Zymogen granule protein 16 homolog B OS=Homo sapiens OX=9606 GN=ZG16B PE=1 SV=3	0.002	0.6827
sp|P01011|AACT_HUMAN	P01011	8	11	23.9	423	47651	Alpha-1-antichymotrypsin OS=Homo sapiens OX=9606 GN=SERPINA3 PE=1 SV=2	0.0009	0.7338
sp|P06733|ENOA_HUMAN	P06733	6	11	13.4	434	47169	Alpha-enolase OS=Homo sapiens OX=9606 GN=ENO1 PE=1 SV=2	0.0009	0.3614
sp|P98088|MUC5A_HUMAN	P98088	8	11	6	5654	585574	Mucin-5AC OS=Homo sapiens OX=9606 GN=MUC5AC PE=1 SV=4	0.0001	0.1482
sp|Q15782|CH3L2_HUMAN	Q15782	7	11	21	390	43501	Chitinase-3-like protein 2 OS=Homo sapiens OX=9606 GN=CHI3L2 PE=1 SV=1	0.001	0.6218
sp|Q7Z3Y8|K1C27_HUMAN	Q7Z3Y8	7	11	10.7	459	49822	Keratin, type I cytoskeletal 27 OS=Homo sapiens OX=9606 GN=KRT27 PE=1 SV=2	0.0008	0.2794
sp|A0A0C4DH36|HV338_HUMAN	A0A0C4DH36	4	10	19	116	12759	Probable non-functional immunoglobulin heavy variable 3-38 OS=Homo sapiens OX=9606 GN=IGHV3-38 PE=1 SV=1	0.003	0.5488
sp|P01009|A1AT_HUMAN	P01009	9	10	19.1	418	46737	Alpha-1-antitrypsin OS=Homo sapiens OX=9606 GN=SERPINA1 PE=1 SV=3	0.0008	0.5524
sp|P01619|KV320_HUMAN	P01619	4	10	46.6	116	12557	Immunoglobulin kappa variable 3-20 OS=Homo sapiens OX=9606 GN=IGKV3-20 PE=1 SV=2	0.003	1.9242
sp|P04792|HSPB1_HUMAN	P04792	7	10	60	205	22783	Heat shock protein beta-1 OS=Homo sapiens OX=9606 GN=HSPB1 PE=1 SV=2	0.0017	2.9811
sp|P07339|CATD_HUMAN	P07339	6	10	18.4	412	44552	Cathepsin D OS=Homo sapiens OX=9606 GN=CTSD PE=1 SV=1	0.0009	0.5276
sp|P81605|DCD_HUMAN	P81605	7	10	46.4	110	11284	Dermcidin OS=Homo sapiens OX=9606 GN=DCD PE=1 SV=2	0.0032	1.9107
sp|Q14515|SPRL1_HUMAN	Q14515	6	10	11.4	664	75208	SPARC-like protein 1 OS=Homo sapiens OX=9606 GN=SPARCL1 PE=1 SV=2	0.0005	0.3002
sp|P01766|HV313_HUMAN	P01766	4	9	25	116	12506	Immunoglobulin heavy variable 3-13 OS=Homo sapiens OX=9606 GN=IGHV3-13 PE=1 SV=2	0.0027	0.7783
sp|P01859|IGHG2_HUMAN	P01859	7	9	20	395	43806	Immunoglobulin heavy constant gamma 2 OS=Homo sapiens OX=9606 GN=IGHG2 PE=1 SV=3	0.0008	0.5849
sp|P01861|IGHG4_HUMAN	P01861	6	9	15.7	396	43832	Immunoglobulin heavy constant gamma 4 OS=Homo sapiens OX=9606 GN=IGHG4 PE=1 SV=2	0.0008	0.4355
sp|P05109|S10A8_HUMAN	P05109	7	9	46.2	93	10834	Protein S100-A8 OS=Homo sapiens OX=9606 GN=S100A8 PE=1 SV=1	0.0034	1.8973
sp|P26447|S10A4_HUMAN	P26447	6	9	31.7	101	11728	Protein S100-A4 OS=Homo sapiens OX=9606 GN=S100A4 PE=1 SV=1	0.0031	1.0749
sp|P55058|PLTP_HUMAN	P55058	8	9	15.8	493	54739	Phospholipid transfer protein OS=Homo sapiens OX=9606 GN=PLTP PE=1 SV=1	0.0006	0.4388
sp|Q13217|DNJC3_HUMAN	Q13217	5	9	12.5	504	57580	DnaJ homolog subfamily C member 3 OS=Homo sapiens OX=9606 GN=DNAJC3 PE=1 SV=1	0.0006	0.3335
sp|Q9H3U1|UN45A_HUMAN	Q9H3U1	1	9	2.3	944	103077	Protein unc-45 homolog A OS=Homo sapiens OX=9606 GN=UNC45A PE=1 SV=1	0.0003	0.0544
sp|P02763|A1AG1_HUMAN	P02763	5	8	16.9	201	23540	Alpha-1-acid glycoprotein 1 OS=Homo sapiens OX=9606 GN=ORM1 PE=1 SV=2	0.0014	0.4757
sp|P06312|KV401_HUMAN	P06312	4	8	29.8	121	13380	Immunoglobulin kappa variable 4-1 OS=Homo sapiens OX=9606 GN=IGKV4-1 PE=1 SV=1	0.0023	0.9861
sp|P07602|SAP_HUMAN	P07602	7	8	17.2	524	58113	Prosaposin OS=Homo sapiens OX=9606 GN=PSAP PE=1 SV=2	0.0005	0.4859
sp|P59665|DEF1_HUMAN;sp|P59666|DEF3_HUMAN	P59665;P59666	6	8	20.2	94	10201	Neutrophil defensin 1 OS=Homo sapiens OX=9606 GN=DEFA1 PE=1 SV=1	0.003	0.5922
sp|Q8N1N4|K2C78_HUMAN	Q8N1N4	6	8	8.3	520	56866	Keratin, type II cytoskeletal 78 OS=Homo sapiens OX=9606 GN=KRT78 PE=1 SV=2	0.0005	0.2106
sp|Q96S96|PEBP4_HUMAN	Q96S96	4	8	29.1	227	25733	Phosphatidylethanolamine-binding protein 4 OS=Homo sapiens OX=9606 GN=PEBP4 PE=1 SV=3	0.0012	0.9543
sp|A0A0A0MRZ8|KVD11_HUMAN;sp|P04433|KV311_HUMAN	A0A0A0MRZ8;P04433	3	7	32.2	115	12625	Immunoglobulin kappa variable 3D-11 OS=Homo sapiens OX=9606 GN=IGKV3D-11 PE=3 SV=6	0.0021	1.0989
sp|A0A0C4DH72|KV106_HUMAN	A0A0C4DH72	4	7	31.6	117	12697	Immunoglobulin kappa variable 1-6 OS=Homo sapiens OX=9606 GN=IGKV1-6 PE=3 SV=1	0.0021	1.0701
sp|P00751|CFAB_HUMAN	P00751	4	7	6	764	85533	Complement factor B OS=Homo sapiens OX=9606 GN=CFB PE=1 SV=2	0.0003	0.1482
sp|P30740|ILEU_HUMAN	P30740	6	7	17.2	379	42742	Leukocyte elastase inhibitor OS=Homo sapiens OX=9606 GN=SERPINB1 PE=1 SV=1	0.0007	0.4859
sp|Q02818|NUCB1_HUMAN	Q02818	6	7	15.6	461	53879	Nucleobindin-1 OS=Homo sapiens OX=9606 GN=NUCB1 PE=1 SV=4	0.0005	0.4322
sp|Q14697|GANAB_HUMAN	Q14697	5	7	7.8	944	106874	Neutral alpha-glucosidase AB OS=Homo sapiens OX=9606 GN=GANAB PE=1 SV=3	0.0003	0.1967
sp|A0A075B6K4|LV310_HUMAN	A0A075B6K4	2	6	16.5	115	12441	Immunoglobulin lambda variable 3-10 OS=Homo sapiens OX=9606 GN=IGLV3-10 PE=3 SV=2	0.0018	0.4622
sp|A0A075B6R9|KVD24_HUMAN;sp|A0A0C4DH68|KV224_HUMAN	A0A075B6R9;A0A0C4DH68	3	6	16.7	120	13079	Probable non-functional immunoglobulin kappa variable 2D-24 OS=Homo sapiens OX=9606 GN=IGKV2D-24 PE=1 SV=1	0.0018	0.4689
sp|P01033|TIMP1_HUMAN	P01033	6	6	35.3	207	23171	Metalloproteinase inhibitor 1 OS=Homo sapiens OX=9606 GN=TIMP1 PE=1 SV=1	0.001	1.2542
sp|P31749|AKT1_HUMAN;sp|Q9Y243|AKT3_HUMAN;sp|P31751|AKT2_HUMAN	P31749;Q9Y243;P31751	1	6	3.3	480	55686	RAC-alpha serine/threonine-protein kinase OS=Homo sapiens OX=9606 GN=AKT1 PE=1 SV=2	0.0004	0.0789
sp|P35900|K1C20_HUMAN	P35900	5	6	4.5	424	48487	Keratin, type I cytoskeletal 20 OS=Homo sapiens OX=9606 GN=KRT20 PE=1 SV=1	0.0005	0.1092
sp|P62805|H4_HUMAN	P62805	4	6	51.5	103	11367	Histone H4 OS=Homo sapiens OX=9606 GN=H4C1 PE=1 SV=2	0.0021	2.2734
sp|A0A0C4DH25|KVD20_HUMAN	A0A0C4DH25	3	5	27.6	116	12515	Immunoglobulin kappa variable 3D-20 OS=Homo sapiens OX=9606 GN=IGKV3D-20 PE=3 SV=1	0.0015	0.888
sp|O00391|QSOX1_HUMAN	O00391	2	5	5	747	82578	Sulfhydryl oxidase 1 OS=Homo sapiens OX=9606 GN=QSOX1 PE=1 SV=3	0.0002	0.122
sp|P01593|KVD33_HUMAN;sp|P01594|KV133_HUMAN	P01593;P01594	1	5	13.7	117	12848	Immunoglobulin kappa variable 1D-33 OS=Homo sapiens OX=9606 GN=IGKV1D-33 PE=1 SV=2	0.0015	0.3709
sp|P01602|KV105_HUMAN	P01602	4	5	32.5	117	12782	Immunoglobulin kappa variable 1-5 OS=Homo sapiens OX=9606 GN=IGKV1-5 PE=1 SV=2	0.0015	1.1135
sp|P01624|KV315_HUMAN	P01624	3	5	32.2	115	12496	Immunoglobulin kappa variable 3-15 OS=Homo sapiens OX=9606 GN=IGKV3-15 PE=1 SV=2	0.0015	1.0989
sp|P04746|AMYP_HUMAN;sp|P19961|AMY2B_HUMAN;sp|P0DUB6|AMY1A_HUMAN;sp|P0DTE8|AMY1C_HUMAN;sp|P0DTE7|AMY1B_HUMAN	P04746;P19961;P0DUB6;P0DTE8;P0DTE7	3	5	8	511	57707	Pancreatic alpha-amylase OS=Homo sapiens OX=9606 GN=AMY2A PE=1 SV=2	0.0003	0.2023
sp|P06310|KV230_HUMAN	P06310	4	5	38.3	120	13185	Immunoglobulin kappa variable 2-30 OS=Homo sapiens OX=9606 GN=IGKV2-30 PE=3 SV=2	0.0015	1.4155
sp|P08603|CFAH_HUMAN	P08603	4	5	3.5	1231	139096	Complement factor H OS=Homo sapiens OX=9606 GN=CFH PE=1 SV=4	0.0001	0.0839
sp|P0DMV8|HS71A_HUMAN;sp|P0DMV9|HS71B_HUMAN	P0DMV8;P0DMV9	3	5	5.9	641	70052	Heat shock 70 kDa protein 1A OS=Homo sapiens OX=9606 GN=HSPA1A PE=1 SV=1	0.0003	0.1455
sp|P10599|THIO_HUMAN	P10599	3	5	39	105	11737	Thioredoxin OS=Homo sapiens OX=9606 GN=TXN PE=1 SV=3	0.0017	1.4547
sp|P28799|GRN_HUMAN	P28799	4	5	10.5	593	63545	Progranulin OS=Homo sapiens OX=9606 GN=GRN PE=1 SV=2	0.0003	0.2735
sp|P60174|TPIS_HUMAN	P60174	3	5	15.3	249	26669	Triosephosphate isomerase OS=Homo sapiens OX=9606 GN=TPI1 PE=1 SV=4	0.0007	0.4223
sp|P62937|PPIA_HUMAN	P62937	5	5	31.5	165	18012	Peptidyl-prolyl cis-trans isomerase A OS=Homo sapiens OX=9606 GN=PPIA PE=1 SV=2	0.0011	1.0654
sp|Q14508|WFDC2_HUMAN	Q14508	1	5	11.3	124	12993	WAP four-disulfide core domain protein 2 OS=Homo sapiens OX=9606 GN=WFDC2 PE=1 SV=2	0.0014	0.2972
sp|Q16630|CPSF6_HUMAN	Q16630	1	5	2	551	59210	Cleavage and polyadenylation specificity factor subunit 6 OS=Homo sapiens OX=9606 GN=CPSF6 PE=1 SV=2	0.0003	0.0471
sp|Q92743|HTRA1_HUMAN	Q92743	3	5	7.3	480	51287	Serine protease HTRA1 OS=Homo sapiens OX=9606 GN=HTRA1 PE=1 SV=1	0.0004	0.183
sp|A0A075B6I9|LV746_HUMAN;sp|P04211|LV743_HUMAN	A0A075B6I9;P04211	2	4	13.7	117	12468	Immunoglobulin lambda variable 7-46 OS=Homo sapiens OX=9606 GN=IGLV7-46 PE=3 SV=4	0.0012	0.3709
sp|A0A075B6P5|KV228_HUMAN;sp|P01615|KVD28_HUMAN;sp|P01614|KVD40_HUMAN;sp|A0A087WW87|KV240_HUMAN	A0A075B6P5;P01615;P01614;A0A087WW87	3	4	16.7	120	12957	Immunoglobulin kappa variable 2-28 OS=Homo sapiens OX=9606 GN=IGKV2-28 PE=3 SV=1	0.0012	0.4689
sp|A0A075B6S2|KVD29_HUMAN;sp|A2NJV5|KV229_HUMAN;sp|A0A0A0MRZ7|KVD26_HUMAN	A0A075B6S2;A2NJV5;A0A0A0MRZ7	3	4	16.7	120	13143	Immunoglobulin kappa variable 2D-29 OS=Homo sapiens OX=9606 GN=IGKV2D-29 PE=3 SV=1	0.0012	0.4689
sp|O60814|H2B1K_HUMAN;sp|Q99880|H2B1L_HUMAN;sp|Q99879|H2B1M_HUMAN;sp|Q99877|H2B1N_HUMAN;sp|Q93079|H2B1H_HUMAN;sp|Q5QNW6|H2B2F_HUMAN;sp|P62807|H2B1C_HUMAN;sp|P58876|H2B1D_HUMAN;sp|P57053|H2BFS_HUMAN	O60814;Q99880;Q99879;Q99877;Q93079;Q5QNW6;P62807;P58876;P57053	3	4	27	126	13890	Histone H2B type 1-K OS=Homo sapiens OX=9606 GN=H2BC12 PE=1 SV=3	0.0011	0.8621
sp|P02652|APOA2_HUMAN	P02652	2	4	21	100	11175	Apolipoprotein A-II OS=Homo sapiens OX=9606 GN=APOA2 PE=1 SV=1	0.0014	0.6218
sp|P02814|SMR3B_HUMAN	P02814	2	4	65.8	79	8188	Submaxillary gland androgen-regulated protein 3B OS=Homo sapiens OX=9606 GN=SMR3B PE=1 SV=2	0.0018	3.5499
sp|P08571|CD14_HUMAN	P08571	3	4	14.7	375	40076	Monocyte differentiation antigen CD14 OS=Homo sapiens OX=9606 GN=CD14 PE=1 SV=2	0.0004	0.4028
sp|P09211|GSTP1_HUMAN	P09211	3	4	21.9	210	23356	Glutathione S-transferase P OS=Homo sapiens OX=9606 GN=GSTP1 PE=1 SV=2	0.0007	0.6558
sp|P13987|CD59_HUMAN	P13987	3	4	25	128	14177	CD59 glycoprotein OS=Homo sapiens OX=9606 GN=CD59 PE=1 SV=1	0.0011	0.7783
sp|P22352|GPX3_HUMAN	P22352	4	4	19	226	25402	Glutathione peroxidase 3 OS=Homo sapiens OX=9606 GN=GPX3 PE=1 SV=2	0.0006	0.5488
sp|P31944|CASPE_HUMAN	P31944	2	4	11.6	242	27680	Caspase-14 OS=Homo sapiens OX=9606 GN=CASP14 PE=1 SV=2	0.0006	0.3062
sp|P31947|1433S_HUMAN	P31947	3	4	13.3	248	27774	14-3-3 protein sigma OS=Homo sapiens OX=9606 GN=SFN PE=1 SV=1	0.0006	0.3583
sp|P31949|S10AB_HUMAN	P31949	4	4	45.7	105	11740	Protein S100-A11 OS=Homo sapiens OX=9606 GN=S100A11 PE=1 SV=2	0.0013	1.8642
sp|P63104|1433Z_HUMAN	P63104	3	4	15.5	245	27745	14-3-3 protein zeta/delta OS=Homo sapiens OX=9606 GN=YWHAZ PE=1 SV=1	0.0006	0.4289
sp|Q01469|FABP5_HUMAN	Q01469	2	4	23	135	15164	Fatty acid-binding protein 5 OS=Homo sapiens OX=9606 GN=FABP5 PE=1 SV=3	0.001	0.6982
sp|A0A075B6H9|LV469_HUMAN	A0A075B6H9	1	3	14.3	119	12773	Immunoglobulin lambda variable 4-69 OS=Homo sapiens OX=9606 GN=IGLV4-69 PE=1 SV=1	0.0009	0.39
sp|A0A0A0MT36|KVD21_HUMAN	A0A0A0MT36	2	3	15.8	114	12340	Immunoglobulin kappa variable 6D-21 OS=Homo sapiens OX=9606 GN=IGKV6D-21 PE=3 SV=1	0.0009	0.4388
sp|A0A0B4J2H0|HV69D_HUMAN;sp|P0DP01|HV108_HUMAN;sp|P01743|HV146_HUMAN;sp|P01742|HV169_HUMAN;sp|A0A0C4DH29|HV103_HUMAN	A0A0B4J2H0;P0DP01;P01743;P01742;A0A0C4DH29	2	3	12	117	12660	Immunoglobulin heavy variable 1-69D OS=Homo sapiens OX=9606 GN=IGHV1-69D PE=1 SV=1	0.0009	0.3183
sp|A0A0C4DH31|HV118_HUMAN	A0A0C4DH31	3	3	12	117	12820	Immunoglobulin heavy variable 1-18 OS=Homo sapiens OX=9606 GN=IGHV1-18 PE=3 SV=1	0.0009	0.3183
sp|A0A0C4DH41|HV461_HUMAN;sp|P0DP08|HVD82_HUMAN;sp|P0DP06|HVD34_HUMAN;sp|P06331|HV434_HUMAN;sp|P01825|HV459_HUMAN;sp|P01824|HV439_HUMAN	A0A0C4DH41;P0DP08;P0DP06;P06331;P01825;P01824	2	3	21.2	118	13066	Immunoglobulin heavy variable 4-61 OS=Homo sapiens OX=9606 GN=IGHV4-61 PE=1 SV=1	0.0009	0.6293
sp|O43653|PSCA_HUMAN	O43653	1	3	8.8	114	11959	Prostate stem cell antigen OS=Homo sapiens OX=9606 GN=PSCA PE=1 SV=2	0.0009	0.2246
sp|P01700|LV147_HUMAN	P01700	2	3	24.8	117	12284	Immunoglobulin lambda variable 1-47 OS=Homo sapiens OX=9606 GN=IGLV1-47 PE=1 SV=2	0.0009	0.7701
sp|P03950|ANGI_HUMAN	P03950	3	3	25.2	147	16550	Angiogenin OS=Homo sapiens OX=9606 GN=ANG PE=1 SV=1	0.0007	0.7865
sp|P12830|CADH1_HUMAN	P12830	2	3	2	882	97456	Cadherin-1 OS=Homo sapiens OX=9606 GN=CDH1 PE=1 SV=3	0.0001	0.0471
sp|P14923|PLAK_HUMAN	P14923	3	3	5.4	745	81745	Junction plakoglobin OS=Homo sapiens OX=9606 GN=JUP PE=1 SV=3	0.0001	0.1324
sp|P29508|SPB3_HUMAN	P29508	3	3	8.7	390	44565	Serpin B3 OS=Homo sapiens OX=9606 GN=SERPINB3 PE=1 SV=2	0.0003	0.2218
sp|Q06830|PRDX1_HUMAN	Q06830	3	3	11.6	199	22110	Peroxiredoxin-1 OS=Homo sapiens OX=9606 GN=PRDX1 PE=1 SV=1	0.0005	0.3062
sp|Q16651|PRSS8_HUMAN	Q16651	2	3	9.6	343	36431	Prostasin OS=Homo sapiens OX=9606 GN=PRSS8 PE=1 SV=1	0.0003	0.2474
sp|Q5D862|FILA2_HUMAN	Q5D862	3	3	1.8	2391	248072	Filaggrin-2 OS=Homo sapiens OX=9606 GN=FLG2 PE=1 SV=1	0	0.0423
sp|Q5T749|KPRP_HUMAN	Q5T749	3	3	4.8	579	64136	Keratinocyte proline-rich protein OS=Homo sapiens OX=9606 GN=KPRP PE=1 SV=1	0.0002	0.1169
sp|Q96LB3|IFT74_HUMAN	Q96LB3	1	3	2.5	600	69239	Intraflagellar transport protein 74 homolog OS=Homo sapiens OX=9606 GN=IFT74 PE=1 SV=1	0.0002	0.0593
sp|A0A075B6H7|KV37_HUMAN	A0A075B6H7	2	2	12.9	116	12783	Probable non-functional immunoglobulin kappa variable 3-7 OS=Homo sapiens OX=9606 GN=IGKV3-7 PE=1 SV=1	0.0006	0.3459
sp|A0A075B6S5|KV127_HUMAN;sp|A0A0C4DH69|KV109_HUMAN;sp|A0A0C4DH67|KV108_HUMAN	A0A075B6S5;A0A0C4DH69;A0A0C4DH67	2	2	18.8	117	12711	Immunoglobulin kappa variable 1-27 OS=Homo sapiens OX=9606 GN=IGKV1-27 PE=3 SV=1	0.0006	0.5417
sp|O00584|RNT2_HUMAN	O00584	2	2	9.4	256	29481	Ribonuclease T2 OS=Homo sapiens OX=9606 GN=RNASET2 PE=1 SV=2	0.0003	0.2417
sp|O60888|CUTA_HUMAN	O60888	2	2	22.9	179	19116	Protein CutA OS=Homo sapiens OX=9606 GN=CUTA PE=1 SV=2	0.0004	0.6943
sp|O75629|CREG1_HUMAN	O75629	1	2	9.5	220	24075	Protein CREG1 OS=Homo sapiens OX=9606 GN=CREG1 PE=1 SV=1	0.0003	0.2445
sp|P04908|H2A1B_HUMAN;sp|Q9BTM1|H2AJ_HUMAN;sp|Q99878|H2A1J_HUMAN;sp|Q96QV6|H2A1A_HUMAN;sp|Q96KK5|H2A1H_HUMAN;sp|Q93077|H2A1C_HUMAN;sp|Q8IUE6|H2A2B_HUMAN;sp|Q7L7L0|H2A3_HUMAN;sp|Q71UI9|H2AV_HUMAN;sp|Q6FI13|H2A2A_HUMAN;sp|Q16777|H2A2C_HUMAN;sp|P20671|H2A1D_HUMAN;sp|P16104|H2AX_HUMAN;sp|P0C0S8|H2A1_HUMAN;sp|P0C0S5|H2AZ_HUMAN	P04908;Q9BTM1;Q99878;Q96QV6;Q96KK5;Q93077;Q8IUE6;Q7L7L0;Q71UI9;Q6FI13;Q16777;P20671;P16104;P0C0S8;P0C0S5	1	2	6.9	130	14135	Histone H2A type 1-B/E OS=Homo sapiens OX=9606 GN=H2AC4 PE=1 SV=2	0.0005	0.1722
sp|P05090|APOD_HUMAN	P05090	2	2	9.5	189	21276	Apolipoprotein D OS=Homo sapiens OX=9606 GN=APOD PE=1 SV=1	0.0004	0.2445
sp|P0DJI8|SAA1_HUMAN	P0DJI8	2	2	27.9	122	13532	Serum amyloid A-1 protein OS=Homo sapiens OX=9606 GN=SAA1 PE=1 SV=1	0.0006	0.9011
sp|P14314|GLU2B_HUMAN	P14314	2	2	3.8	528	59425	Glucosidase 2 subunit beta OS=Homo sapiens OX=9606 GN=PRKCSH PE=1 SV=2	0.0001	0.0914
sp|P68104|EF1A1_HUMAN;sp|Q5VTE0|EF1A3_HUMAN;sp|Q05639|EF1A2_HUMAN	P68104;Q5VTE0;Q05639	2	2	4.5	462	50141	Elongation factor 1-alpha 1 OS=Homo sapiens OX=9606 GN=EEF1A1 PE=1 SV=1	0.0002	0.1092
sp|P68431|H31_HUMAN;sp|Q71DI3|H32_HUMAN;sp|Q16695|H31T_HUMAN;sp|P84243|H33_HUMAN	P68431;Q71DI3;Q16695;P84243	2	2	13.2	136	15404	Histone H3.1 OS=Homo sapiens OX=9606 GN=H3C1 PE=1 SV=2	0.0005	0.3552
sp|Q5T2L2|AKCL1_HUMAN	Q5T2L2	1	2	9.3	129	14588	Putative aldo-keto reductase family 1 member C8 OS=Homo sapiens OX=9606 GN=AKR1C8 PE=5 SV=2	0.0005	0.2388
sp|Q6PL18|ATAD2_HUMAN	Q6PL18	1	2	1.2	1390	158554	ATPase family AAA domain-containing protein 2 OS=Homo sapiens OX=9606 GN=ATAD2 PE=1 SV=1	0.0001	0.028
sp|Q6UXB3|LYPD2_HUMAN	Q6UXB3	1	2	11.2	125	13115	Ly6/PLAUR domain-containing protein 2 OS=Homo sapiens OX=9606 GN=LYPD2 PE=1 SV=1	0.0006	0.2942
sp|Q86YZ3|HORN_HUMAN	Q86YZ3	2	2	4.4	2850	282389	Hornerin OS=Homo sapiens OX=9606 GN=HRNR PE=1 SV=2	0	0.1066
sp|Q8WXG9|AGRV1_HUMAN	Q8WXG9	1	2	0.1	6306	693082	Adhesion G-protein coupled receptor V1 OS=Homo sapiens OX=9606 GN=ADGRV1 PE=1 SV=2	0	0.0023
sp|Q96GS6|AB17A_HUMAN	Q96GS6	1	2	2.3	310	33990	Alpha/beta hydrolase domain-containing protein 17A OS=Homo sapiens OX=9606 GN=ABHD17A PE=1 SV=1	0.0002	0.0544
sp|A0A075B6K5|LV39_HUMAN;sp|P80748|LV321_HUMAN	A0A075B6K5;P80748	1	1	13.9	115	12332	Immunoglobulin lambda variable 3-9 OS=Homo sapiens OX=9606 GN=IGLV3-9 PE=3 SV=1	0.0003	0.3772
sp|A0A0C4DH35|HV335_HUMAN	A0A0C4DH35	1	1	9.4	117	12810	Probable non-functional immunoglobulin heavy variable 3-35 OS=Homo sapiens OX=9606 GN=IGHV3-35 PE=1 SV=1	0.0003	0.2417
sp|A0A0C4DH38|HV551_HUMAN;sp|A0A0J9YXX1|HV5X1_HUMAN	A0A0C4DH38;A0A0J9YXX1	1	1	9.4	117	12675	Immunoglobulin heavy variable 5-51 OS=Homo sapiens OX=9606 GN=IGHV5-51 PE=3 SV=1	0.0003	0.2417
sp|O43490|PROM1_HUMAN	O43490	1	1	1.5	865	97202	Prominin-1 OS=Homo sapiens OX=9606 GN=PROM1 PE=1 SV=1	0	0.0351
sp|O43609|SPY1_HUMAN	O43609	1	1	7.8	319	35122	Protein sprouty homolog 1 OS=Homo sapiens OX=9606 GN=SPRY1 PE=1 SV=2	0.0001	0.1967
sp|O75888|TNF13_HUMAN	O75888	1	1	4	250	27433	Tumor necrosis factor ligand superfamily member 13 OS=Homo sapiens OX=9606 GN=TNFSF13 PE=1 SV=1	0.0001	0.0965
sp|P00338|LDHA_HUMAN;sp|Q6ZMR3|LDH6A_HUMAN;sp|P07864|LDHC_HUMAN;sp|P07195|LDHB_HUMAN	P00338;Q6ZMR3;P07864;P07195	1	1	3.6	332	36689	L-lactate dehydrogenase A chain OS=Homo sapiens OX=9606 GN=LDHA PE=1 SV=2	0.0001	0.0864
sp|P01701|LV151_HUMAN	P01701	1	1	24.8	117	12249	Immunoglobulin lambda variable 1-51 OS=Homo sapiens OX=9606 GN=IGLV1-51 PE=1 SV=2	0.0003	0.7701
sp|P02749|APOH_HUMAN	P02749	1	1	2.6	345	38298	Beta-2-glycoprotein 1 OS=Homo sapiens OX=9606 GN=APOH PE=1 SV=3	0.0001	0.0617
sp|P02774|VTDB_HUMAN	P02774	1	1	2.3	474	52918	Vitamin D-binding protein OS=Homo sapiens OX=9606 GN=GC PE=1 SV=2	0.0001	0.0544
sp|P02790|HEMO_HUMAN	P02790	1	1	1.7	462	51676	Hemopexin OS=Homo sapiens OX=9606 GN=HPX PE=1 SV=2	0.0001	0.0399
sp|P04075|ALDOA_HUMAN	P04075	1	1	5.5	364	39420	Fructose-bisphosphate aldolase A OS=Homo sapiens OX=9606 GN=ALDOA PE=1 SV=2	0.0001	0.135
sp|P07711|CATL1_HUMAN	P07711	1	1	3.6	333	37564	Procathepsin L OS=Homo sapiens OX=9606 GN=CTSL PE=1 SV=2	0.0001	0.0864
sp|P08311|CATG_HUMAN	P08311	1	1	3.5	255	28837	Cathepsin G OS=Homo sapiens OX=9606 GN=CTSG PE=1 SV=2	0.0001	0.0839
sp|P09237|MMP7_HUMAN	P09237	1	1	3.4	267	29677	Matrilysin OS=Homo sapiens OX=9606 GN=MMP7 PE=1 SV=1	0.0001	0.0814
sp|P14174|MIF_HUMAN	P14174	1	1	7.8	115	12476	Macrophage migration inhibitory factor OS=Homo sapiens OX=9606 GN=MIF PE=1 SV=4	0.0003	0.1967
sp|P15328|FOLR1_HUMAN	P15328	1	1	7.4	257	29819	Folate receptor alpha OS=Homo sapiens OX=9606 GN=FOLR1 PE=1 SV=3	0.0001	0.1858
sp|P21926|CD9_HUMAN	P21926	1	1	4.4	228	25416	CD9 antigen OS=Homo sapiens OX=9606 GN=CD9 PE=1 SV=4	0.0002	0.1066
sp|Q02413|DSG1_HUMAN	Q02413	1	1	1.3	1049	113748	Desmoglein-1 OS=Homo sapiens OX=9606 GN=DSG1 PE=1 SV=2	0	0.0304
sp|Q08554|DSC1_HUMAN	Q08554	1	1	1.9	894	99987	Desmocollin-1 OS=Homo sapiens OX=9606 GN=DSC1 PE=1 SV=2	0	0.0447
sp|Q11201|SIA4A_HUMAN	Q11201	1	1	4.7	340	39075	CMP-N-acetylneuraminate-beta-galactosamide-alpha-2,3-sialyltransferase 1 OS=Homo sapiens OX=9606 GN=ST3GAL1 PE=1 SV=1	0.0001	0.1143
sp|Q13753|LAMC2_HUMAN	Q13753	1	1	1	1193	130976	Laminin subunit gamma-2 OS=Homo sapiens OX=9606 GN=LAMC2 PE=1 SV=2	0	0.0233
sp|Q5VTL7|FNDC7_HUMAN	Q5VTL7	1	1	2.9	733	78236	Fibronectin type III domain-containing protein 7 OS=Homo sapiens OX=9606 GN=FNDC7 PE=2 SV=3	0	0.0691
sp|Q6NUJ1|SAPL1_HUMAN	Q6NUJ1	1	1	2.1	521	56627	Proactivator polypeptide-like 1 OS=Homo sapiens OX=9606 GN=PSAPL1 PE=2 SV=2	0.0001	0.0495
sp|Q86WT1|IT70A_HUMAN;sp|Q8N4P2|IT70B_HUMAN	Q86WT1;Q8N4P2	1	1	1.5	665	76136	Intraflagellar transport protein 70A OS=Homo sapiens OX=9606 GN=IFT70A PE=2 SV=3	0.0001	0.0351
sp|Q86X29|LSR_HUMAN	Q86X29	1	1	1.7	649	71439	Lipolysis-stimulated lipoprotein receptor OS=Homo sapiens OX=9606 GN=LSR PE=1 SV=4	0.0001	0.0399
sp|Q86Z02|HIPK1_HUMAN	Q86Z02	1	1	0.6	1210	130843	Homeodomain-interacting protein kinase 1 OS=Homo sapiens OX=9606 GN=HIPK1 PE=1 SV=1	0	0.0139
sp|Q8N1W2|ZN710_HUMAN	Q8N1W2	1	1	1.2	664	74461	Zinc finger protein 710 OS=Homo sapiens OX=9606 GN=ZNF710 PE=1 SV=2	0.0001	0.028
sp|Q96BQ1|FAM3D_HUMAN	Q96BQ1	1	1	8	224	24963	Protein FAM3D OS=Homo sapiens OX=9606 GN=FAM3D PE=1 SV=1	0.0002	0.2023
sp|Q96DR8|MUCL1_HUMAN	Q96DR8	1	1	10	90	9039	Mucin-like protein 1 OS=Homo sapiens OX=9606 GN=MUCL1 PE=1 SV=1	0.0004	0.2589
sp|Q9BWS9|CHID1_HUMAN	Q9BWS9	1	1	4.3	393	44941	Chitinase domain-containing protein 1 OS=Homo sapiens OX=9606 GN=CHID1 PE=1 SV=1	0.0001	0.1041
sp|Q9UJ90|KCNE5_HUMAN	Q9UJ90	1	1	7.7	142	14993	Potassium voltage-gated channel subfamily E regulatory beta subunit 5 OS=Homo sapiens OX=9606 GN=KCNE5 PE=1 SV=1	0.0002	0.194

## Sheet: 8) 200ng-44min#2(201)
Protein Group Name	Protein Accession	Number Stripped Peptides	Number PSMs	Protein Coverage	Protein Length	Protein Molecular Weight	Protein Description	NSAF Score	EmPAI Score
sp|P02788|TRFL_HUMAN	P02788	193	1036	91	710	78182	Lactotransferrin OS=Homo sapiens OX=9606 GN=LTF PE=1 SV=6	0.0576	7.1283
sp|P61626|LYSC_HUMAN	P61626	52	311	87.2	148	16537	Lysozyme C OS=Homo sapiens OX=9606 GN=LYZ PE=1 SV=1	0.0829	6.4473
sp|P31025|LCN1_HUMAN	P31025	58	301	78.4	176	19250	Lipocalin-1 OS=Homo sapiens OX=9606 GN=LCN1 PE=1 SV=1	0.0675	5.0814
sp|P01833|PIGR_HUMAN	P01833	88	262	59.9	764	83284	Polymeric immunoglobulin receptor OS=Homo sapiens OX=9606 GN=PIGR PE=1 SV=4	0.0135	2.9719
sp|P01876|IGHA1_HUMAN	P01876	42	236	63.3	398	42849	Immunoglobulin heavy constant alpha 1 OS=Homo sapiens OX=9606 GN=IGHA1 PE=1 SV=3	0.0234	3.2954
sp|P02768|ALBU_HUMAN	P02768	104	234	90.1	609	69367	Albumin OS=Homo sapiens OX=9606 GN=ALB PE=1 SV=2	0.0152	6.9616
sp|P12273|PIP_HUMAN	P12273	32	221	77.4	146	16572	Prolactin-inducible protein OS=Homo sapiens OX=9606 GN=PIP PE=1 SV=1	0.0597	4.9429
sp|P25311|ZA2G_HUMAN	P25311	46	177	64.8	298	34259	Zinc-alpha-2-glycoprotein OS=Homo sapiens OX=9606 GN=AZGP1 PE=1 SV=2	0.0234	3.4463
sp|P04264|K2C1_HUMAN	P04264	70	173	63.7	644	66039	Keratin, type II cytoskeletal 1 OS=Homo sapiens OX=9606 GN=KRT1 PE=1 SV=6	0.0106	3.3351
sp|P0DOX2|IGA2_HUMAN	P0DOX2	22	139	40.9	455	48934	Immunoglobulin alpha-2 heavy chain OS=Homo sapiens OX=9606 PE=1 SV=2	0.0121	1.5645
sp|Q9GZZ8|LACRT_HUMAN	Q9GZZ8	25	136	39.9	138	14246	Extracellular glycoprotein lacritin OS=Homo sapiens OX=9606 GN=LACRT PE=1 SV=1	0.0389	1.5061
sp|P01834|IGKC_HUMAN	P01834	20	135	97.2	107	11765	Immunoglobulin kappa constant OS=Homo sapiens OX=9606 GN=IGKC PE=1 SV=2	0.0498	8.3756
sp|P01877|IGHA2_HUMAN	P01877	17	133	31.5	391	42334	Immunoglobulin heavy constant alpha 2 OS=Homo sapiens OX=9606 GN=IGHA2 PE=1 SV=5	0.0134	1.0654
sp|P01024|CO3_HUMAN	P01024	83	132	40.7	1663	187147	Complement C3 OS=Homo sapiens OX=9606 GN=C3 PE=1 SV=2	0.0031	1.5527
sp|O75556|SG2A1_HUMAN	O75556	26	115	73.7	95	10884	Mammaglobin-B OS=Homo sapiens OX=9606 GN=SCGB2A1 PE=1 SV=1	0.0478	4.4576
sp|Q16378|PROL4_HUMAN	Q16378	14	106	37.3	134	15097	Proline-rich protein 4 OS=Homo sapiens OX=9606 GN=PRR4 PE=1 SV=3	0.0312	1.3605
sp|P01036|CYTS_HUMAN	P01036	24	101	76.6	141	16214	Cystatin-S OS=Homo sapiens OX=9606 GN=CST4 PE=1 SV=3	0.0283	4.8345
sp|Q9UGM3|DMBT1_HUMAN	Q9UGM3	38	101	39.1	2413	260734	Deleted in malignant brain tumors 1 protein OS=Homo sapiens OX=9606 GN=DMBT1 PE=1 SV=2	0.0017	1.4604
sp|P98160|PGBM_HUMAN	P98160	70	100	18.8	4391	468835	Basement membrane-specific heparan sulfate proteoglycan core protein OS=Homo sapiens OX=9606 GN=HSPG2 PE=1 SV=4	0.0009	0.5417
sp|P35527|K1C9_HUMAN	P35527	47	99	62.1	623	62064	Keratin, type I cytoskeletal 9 OS=Homo sapiens OX=9606 GN=KRT9 PE=1 SV=3	0.0063	3.1783
sp|P0DOX7|IGK_HUMAN	P0DOX7	19	94	65	214	23379	Immunoglobulin kappa light chain OS=Homo sapiens OX=9606 PE=1 SV=1	0.0173	3.4668
sp|P13645|K1C10_HUMAN	P13645	47	93	56	584	58827	Keratin, type I cytoskeletal 10 OS=Homo sapiens OX=9606 GN=KRT10 PE=1 SV=6	0.0063	2.6308
sp|P35908|K22E_HUMAN	P35908	53	92	62.6	639	65433	Keratin, type II cytoskeletal 2 epidermal OS=Homo sapiens OX=9606 GN=KRT2 PE=1 SV=2	0.0057	3.2267
sp|Q99935|PROL1_HUMAN	Q99935	11	85	31.9	248	27216	Opiorphin prepropeptide OS=Homo sapiens OX=9606 GN=OPRPN PE=1 SV=2	0.0135	1.0845
sp|P13647|K2C5_HUMAN	P13647	50	82	49.2	590	62378	Keratin, type II cytoskeletal 5 OS=Homo sapiens OX=9606 GN=KRT5 PE=1 SV=3	0.0055	2.1046
sp|P0DOY3|IGLC3_HUMAN	P0DOY3	23	68	93.4	106	11266	Immunoglobulin lambda constant 3 OS=Homo sapiens OX=9606 GN=IGLC3 PE=1 SV=1	0.0253	7.5901
sp|P02538|K2C6A_HUMAN	P02538	44	67	48.8	564	60045	Keratin, type II cytoskeletal 6A OS=Homo sapiens OX=9606 GN=KRT6A PE=1 SV=3	0.0047	2.0761
sp|P01591|IGJ_HUMAN	P01591	20	64	69.8	159	18099	Immunoglobulin J chain OS=Homo sapiens OX=9606 GN=JCHAIN PE=1 SV=4	0.0159	3.9888
sp|P0DOX8|IGL1_HUMAN	P0DOX8	16	64	55.6	216	22830	Immunoglobulin lambda-1 light chain OS=Homo sapiens OX=9606 PE=1 SV=1	0.0117	2.5975
sp|P48668|K2C6C_HUMAN	P48668	42	63	47	564	60025	Keratin, type II cytoskeletal 6C OS=Homo sapiens OX=9606 GN=KRT6C PE=1 SV=3	0.0044	1.9512
sp|P01037|CYTN_HUMAN	P01037	15	60	64.5	141	16388	Cystatin-SN OS=Homo sapiens OX=9606 GN=CST1 PE=1 SV=3	0.0168	3.4157
sp|P04259|K2C6B_HUMAN	P04259	39	60	42.4	564	60067	Keratin, type II cytoskeletal 6B OS=Homo sapiens OX=9606 GN=KRT6B PE=1 SV=5	0.0042	1.6546
sp|O95968|SG1D1_HUMAN	O95968	21	59	46.7	90	9898	Secretoglobin family 1D member 1 OS=Homo sapiens OX=9606 GN=SCGB1D1 PE=1 SV=1	0.0259	1.9309
sp|P02533|K1C14_HUMAN	P02533	33	58	53.6	472	51561	Keratin, type I cytoskeletal 14 OS=Homo sapiens OX=9606 GN=KRT14 PE=1 SV=4	0.0048	2.4356
sp|P10909|CLUS_HUMAN	P10909	28	57	36.7	449	52495	Clusterin OS=Homo sapiens OX=9606 GN=CLU PE=1 SV=1	0.005	1.3281
sp|P13646|K1C13_HUMAN	P13646	36	57	57	458	49588	Keratin, type I cytoskeletal 13 OS=Homo sapiens OX=9606 GN=KRT13 PE=1 SV=4	0.0049	2.7154
sp|P01871|IGHM_HUMAN	P01871	25	51	39.9	474	51924	Immunoglobulin heavy constant mu OS=Homo sapiens OX=9606 GN=IGHM PE=1 SV=5	0.0042	1.5061
sp|Q13421|MSLN_HUMAN	Q13421	25	49	38.3	630	68986	Mesothelin OS=Homo sapiens OX=9606 GN=MSLN PE=1 SV=2	0.0031	1.4155
sp|P08779|K1C16_HUMAN	P08779	26	47	35.7	473	51268	Keratin, type I cytoskeletal 16 OS=Homo sapiens OX=9606 GN=KRT16 PE=1 SV=4	0.0039	1.2751
sp|P14555|PA2GA_HUMAN	P14555	17	45	55.6	144	16083	Phospholipase A2, membrane associated OS=Homo sapiens OX=9606 GN=PLA2G2A PE=1 SV=2	0.0123	2.5975
sp|P00738|HPT_HUMAN	P00738	22	42	38.7	406	45205	Haptoglobin OS=Homo sapiens OX=9606 GN=HP PE=1 SV=1	0.0041	1.4378
sp|P02787|TRFE_HUMAN	P02787	26	41	35.1	698	77050	Serotransferrin OS=Homo sapiens OX=9606 GN=TF PE=1 SV=4	0.0023	1.2439
sp|P22079|PERL_HUMAN	P22079	21	37	29.2	712	80288	Lactoperoxidase OS=Homo sapiens OX=9606 GN=LPO PE=1 SV=2	0.0021	0.9588
sp|P19012|K1C15_HUMAN	P19012	17	35	21.7	456	49212	Keratin, type I cytoskeletal 15 OS=Homo sapiens OX=9606 GN=KRT15 PE=1 SV=3	0.003	0.6482
sp|P61769|B2MG_HUMAN	P61769	16	35	78.2	119	13715	Beta-2-microglobulin OS=Homo sapiens OX=9606 GN=B2M PE=1 SV=1	0.0116	5.0534
sp|Q08380|LG3BP_HUMAN	Q08380	20	34	34.7	585	65331	Galectin-3-binding protein OS=Homo sapiens OX=9606 GN=LGALS3BP PE=1 SV=1	0.0023	1.2233
sp|Q04695|K1C17_HUMAN	Q04695	18	32	22.2	432	48106	Keratin, type I cytoskeletal 17 OS=Homo sapiens OX=9606 GN=KRT17 PE=1 SV=2	0.0029	0.6672
sp|P19013|K2C4_HUMAN	P19013	21	31	36.3	520	56144	Keratin, type II cytoskeletal 4 OS=Homo sapiens OX=9606 GN=KRT4 PE=1 SV=5	0.0024	1.3067
sp|P60709|ACTB_HUMAN;sp|P63261|ACTG_HUMAN	P60709;P63261	17	31	45.3	375	41737	Actin, cytoplasmic 1 OS=Homo sapiens OX=9606 GN=ACTB PE=1 SV=1	0.0033	1.8379
sp|P03973|SLPI_HUMAN	P03973	15	30	74.2	132	14326	Antileukoproteinase OS=Homo sapiens OX=9606 GN=SLPI PE=1 SV=2	0.009	4.5208
sp|P08727|K1C19_HUMAN	P08727	16	30	41.8	400	44106	Keratin, type I cytoskeletal 19 OS=Homo sapiens OX=9606 GN=KRT19 PE=1 SV=4	0.003	1.6182
sp|P12035|K2C3_HUMAN	P12035	21	30	13.4	628	64417	Keratin, type II cytoskeletal 3 OS=Homo sapiens OX=9606 GN=KRT3 PE=1 SV=3	0.0019	0.3614
sp|Q01546|K22O_HUMAN	Q01546	18	27	11.6	638	65841	Keratin, type II cytoskeletal 2 oral OS=Homo sapiens OX=9606 GN=KRT76 PE=1 SV=2	0.0017	0.3062
sp|P00450|CERU_HUMAN	P00450	18	25	21.3	1065	122205	Ceruloplasmin OS=Homo sapiens OX=9606 GN=CP PE=1 SV=1	0.0009	0.6331
sp|Q5XKE5|K2C79_HUMAN	Q5XKE5	15	24	12.5	535	57836	Keratin, type II cytoskeletal 79 OS=Homo sapiens OX=9606 GN=KRT79 PE=1 SV=2	0.0018	0.3335
sp|P80188|NGAL_HUMAN	P80188	15	23	61.6	198	22588	Neutrophil gelatinase-associated lipocalin OS=Homo sapiens OX=9606 GN=LCN2 PE=1 SV=2	0.0046	3.1305
sp|Q8N474|SFRP1_HUMAN	Q8N474	14	21	38.9	314	35386	Secreted frizzled-related protein 1 OS=Homo sapiens OX=9606 GN=SFRP1 PE=1 SV=1	0.0026	1.4491
sp|P06396|GELS_HUMAN	P06396	13	19	20.6	782	85697	Gelsolin OS=Homo sapiens OX=9606 GN=GSN PE=1 SV=1	0.001	0.6069
sp|P07858|CATB_HUMAN	P07858	12	18	30.7	339	37822	Cathepsin B OS=Homo sapiens OX=9606 GN=CTSB PE=1 SV=3	0.0021	1.0277
sp|P20061|TCO1_HUMAN	P20061	11	17	30.5	433	48207	Transcobalamin-1 OS=Homo sapiens OX=9606 GN=TCN1 PE=1 SV=2	0.0015	1.0184
sp|P01034|CYTC_HUMAN	P01034	9	16	48.6	146	15799	Cystatin-C OS=Homo sapiens OX=9606 GN=CST3 PE=1 SV=1	0.0043	2.062
sp|P02647|APOA1_HUMAN	P02647	12	16	46.4	267	30778	Apolipoprotein A-I OS=Homo sapiens OX=9606 GN=APOA1 PE=1 SV=1	0.0024	1.9107
sp|P05787|K2C8_HUMAN	P05787	12	16	8.7	483	53704	Keratin, type II cytoskeletal 8 OS=Homo sapiens OX=9606 GN=KRT8 PE=1 SV=7	0.0013	0.2218
sp|A0A0B4J1X5|HV374_HUMAN	A0A0B4J1X5	8	14	54.7	117	12840	Immunoglobulin heavy variable 3-74 OS=Homo sapiens OX=9606 GN=IGHV3-74 PE=3 SV=1	0.0047	2.5237
sp|P01011|AACT_HUMAN	P01011	8	14	19.6	423	47651	Alpha-1-antichymotrypsin OS=Homo sapiens OX=9606 GN=SERPINA3 PE=1 SV=2	0.0013	0.5704
sp|A0A0B4J1V0|HV315_HUMAN	A0A0B4J1V0	6	13	30.3	119	12926	Immunoglobulin heavy variable 3-15 OS=Homo sapiens OX=9606 GN=IGHV3-15 PE=3 SV=1	0.0043	1.0091
sp|P01009|A1AT_HUMAN	P01009	9	13	13.6	418	46737	Alpha-1-antitrypsin OS=Homo sapiens OX=9606 GN=SERPINA1 PE=1 SV=3	0.0012	0.3677
sp|P04083|ANXA1_HUMAN	P04083	10	13	43.9	346	38714	Annexin A1 OS=Homo sapiens OX=9606 GN=ANXA1 PE=1 SV=2	0.0015	1.7479
sp|P04406|G3P_HUMAN	P04406	7	13	22.1	335	36053	Glyceraldehyde-3-phosphate dehydrogenase OS=Homo sapiens OX=9606 GN=GAPDH PE=1 SV=3	0.0015	0.6634
sp|P0DOX5|IGG1_HUMAN	P0DOX5	10	13	27.2	449	49329	Immunoglobulin gamma-1 heavy chain OS=Homo sapiens OX=9606 PE=1 SV=2	0.0011	0.8707
sp|P80303|NUCB2_HUMAN	P80303	11	13	23.8	420	50223	Nucleobindin-2 OS=Homo sapiens OX=9606 GN=NUCB2 PE=1 SV=3	0.0012	0.7298
sp|Q14CN4|K2C72_HUMAN	Q14CN4	7	13	7	511	55877	Keratin, type II cytoskeletal 72 OS=Homo sapiens OX=9606 GN=KRT72 PE=1 SV=2	0.001	0.1749
sp|Q86Y46|K2C73_HUMAN	Q86Y46	10	13	11.9	540	58923	Keratin, type II cytoskeletal 73 OS=Homo sapiens OX=9606 GN=KRT73 PE=1 SV=1	0.0009	0.3152
sp|Q96DA0|ZG16B_HUMAN	Q96DA0	8	13	23.6	208	22739	Zymogen granule protein 16 homolog B OS=Homo sapiens OX=9606 GN=ZG16B PE=1 SV=3	0.0025	0.7219
sp|P06312|KV401_HUMAN	P06312	4	12	29.8	121	13380	Immunoglobulin kappa variable 4-1 OS=Homo sapiens OX=9606 GN=IGKV4-1 PE=1 SV=1	0.0039	0.9861
sp|P06702|S10A9_HUMAN	P06702	9	12	43	114	13242	Protein S100-A9 OS=Homo sapiens OX=9606 GN=S100A9 PE=1 SV=1	0.0042	1.6915
sp|P07339|CATD_HUMAN	P07339	5	11	15.8	412	44552	Cathepsin D OS=Homo sapiens OX=9606 GN=CTSD PE=1 SV=1	0.0011	0.4388
sp|Q3SY84|K2C71_HUMAN	Q3SY84	8	11	10.5	523	57292	Keratin, type II cytoskeletal 71 OS=Homo sapiens OX=9606 GN=KRT71 PE=1 SV=3	0.0008	0.2735
sp|A0A0C4DH42|HV366_HUMAN;sp|P0DP02|HVC33_HUMAN;sp|P01772|HV333_HUMAN;sp|P01767|HV353_HUMAN	A0A0C4DH42;P0DP02;P01772;P01767	6	10	28.4	116	12698	Immunoglobulin heavy variable 3-66 OS=Homo sapiens OX=9606 GN=IGHV3-66 PE=3 SV=1	0.0034	0.9231
sp|P07355|ANXA2_HUMAN	P07355	7	10	23.9	339	38604	Annexin A2 OS=Homo sapiens OX=9606 GN=ANXA2 PE=1 SV=2	0.0012	0.7338
sp|P55058|PLTP_HUMAN	P55058	7	10	14.4	493	54739	Phospholipid transfer protein OS=Homo sapiens OX=9606 GN=PLTP PE=1 SV=1	0.0008	0.3932
sp|Q6UXB2|CXL17_HUMAN	Q6UXB2	7	10	42	119	13819	C-X-C motif chemokine 17 OS=Homo sapiens OX=9606 GN=CXCL17 PE=1 SV=1	0.0033	1.6303
sp|Q7Z3Y8|K1C27_HUMAN	Q7Z3Y8	5	10	8.5	459	49822	Keratin, type I cytoskeletal 27 OS=Homo sapiens OX=9606 GN=KRT27 PE=1 SV=2	0.0009	0.2162
sp|P01619|KV320_HUMAN	P01619	4	9	46.6	116	12557	Immunoglobulin kappa variable 3-20 OS=Homo sapiens OX=9606 GN=IGKV3-20 PE=1 SV=2	0.0031	1.9242
sp|P01764|HV323_HUMAN;sp|P0DP03|HVC05_HUMAN;sp|P01768|HV330_HUMAN	P01764;P0DP03;P01768	6	9	28.2	117	12582	Immunoglobulin heavy variable 3-23 OS=Homo sapiens OX=9606 GN=IGHV3-23 PE=1 SV=2	0.003	0.9143
sp|P34096|RNAS4_HUMAN	P34096	7	9	43.5	147	16840	Ribonuclease 4 OS=Homo sapiens OX=9606 GN=RNASE4 PE=1 SV=3	0.0024	1.7227
sp|P36894|BMR1A_HUMAN	P36894	1	9	2.1	532	60198	Bone morphogenetic protein receptor type-1A OS=Homo sapiens OX=9606 GN=BMPR1A PE=1 SV=2	0.0007	0.0495
sp|P49788|TIG1_HUMAN	P49788	5	9	13.9	294	33285	Retinoic acid receptor responder protein 1 OS=Homo sapiens OX=9606 GN=RARRES1 PE=1 SV=2	0.0012	0.3772
sp|P81605|DCD_HUMAN	P81605	7	9	47.3	110	11284	Dermcidin OS=Homo sapiens OX=9606 GN=DCD PE=1 SV=2	0.0032	1.9717
sp|Q15782|CH3L2_HUMAN	Q15782	6	9	15.1	390	43501	Chitinase-3-like protein 2 OS=Homo sapiens OX=9606 GN=CHI3L2 PE=1 SV=1	0.0009	0.4158
sp|Q96S96|PEBP4_HUMAN	Q96S96	5	9	31.3	227	25733	Phosphatidylethanolamine-binding protein 4 OS=Homo sapiens OX=9606 GN=PEBP4 PE=1 SV=3	0.0016	1.0559
sp|A0A0A0MRZ8|KVD11_HUMAN;sp|P04433|KV311_HUMAN	A0A0A0MRZ8;P04433	2	8	13.9	115	12625	Immunoglobulin kappa variable 3D-11 OS=Homo sapiens OX=9606 GN=IGKV3D-11 PE=3 SV=6	0.0027	0.3772
sp|P00751|CFAB_HUMAN	P00751	3	8	5	764	85533	Complement factor B OS=Homo sapiens OX=9606 GN=CFB PE=1 SV=2	0.0004	0.122
sp|P01033|TIMP1_HUMAN	P01033	6	8	32.9	207	23171	Metalloproteinase inhibitor 1 OS=Homo sapiens OX=9606 GN=TIMP1 PE=1 SV=1	0.0015	1.133
sp|P01780|HV307_HUMAN	P01780	6	8	34.2	117	12943	Immunoglobulin heavy variable 3-7 OS=Homo sapiens OX=9606 GN=IGHV3-7 PE=1 SV=2	0.0027	1.1979
sp|P01860|IGHG3_HUMAN	P01860	5	8	13.5	446	49093	Immunoglobulin heavy constant gamma 3 OS=Homo sapiens OX=9606 GN=IGHG3 PE=1 SV=3	0.0007	0.3646
sp|P02763|A1AG1_HUMAN	P02763	4	8	12.4	201	23540	Alpha-1-acid glycoprotein 1 OS=Homo sapiens OX=9606 GN=ORM1 PE=1 SV=2	0.0016	0.3305
sp|Q5T749|KPRP_HUMAN	Q5T749	5	8	9.2	579	64136	Keratinocyte proline-rich protein OS=Homo sapiens OX=9606 GN=KPRP PE=1 SV=1	0.0005	0.2359
sp|A0A075B6P5|KV228_HUMAN;sp|P01615|KVD28_HUMAN;sp|P01614|KVD40_HUMAN;sp|A0A087WW87|KV240_HUMAN	A0A075B6P5;P01615;P01614;A0A087WW87	3	7	16.7	120	12957	Immunoglobulin kappa variable 2-28 OS=Homo sapiens OX=9606 GN=IGKV2-28 PE=3 SV=1	0.0023	0.4689
sp|A0A087WSY6|KVD15_HUMAN	A0A087WSY6	3	7	32.2	115	12534	Immunoglobulin kappa variable 3D-15 OS=Homo sapiens OX=9606 GN=IGKV3D-15 PE=3 SV=6	0.0024	1.0989
sp|A0A0C4DH72|KV106_HUMAN	A0A0C4DH72	4	7	31.6	117	12697	Immunoglobulin kappa variable 1-6 OS=Homo sapiens OX=9606 GN=IGKV1-6 PE=3 SV=1	0.0024	1.0701
sp|P01624|KV315_HUMAN	P01624	3	7	32.2	115	12496	Immunoglobulin kappa variable 3-15 OS=Homo sapiens OX=9606 GN=IGKV3-15 PE=1 SV=2	0.0024	1.0989
sp|P01782|HV309_HUMAN	P01782	5	7	28	118	12945	Immunoglobulin heavy variable 3-9 OS=Homo sapiens OX=9606 GN=IGHV3-9 PE=1 SV=2	0.0023	0.9055
sp|P01861|IGHG4_HUMAN	P01861	4	7	13.1	396	43832	Immunoglobulin heavy constant gamma 4 OS=Homo sapiens OX=9606 GN=IGHG4 PE=1 SV=2	0.0007	0.3521
sp|P04792|HSPB1_HUMAN	P04792	4	7	28.8	205	22783	Heat shock protein beta-1 OS=Homo sapiens OX=9606 GN=HSPB1 PE=1 SV=2	0.0013	0.9409
sp|P05109|S10A8_HUMAN	P05109	5	7	45.2	93	10834	Protein S100-A8 OS=Homo sapiens OX=9606 GN=S100A8 PE=1 SV=1	0.003	1.8314
sp|P0DP04|HV43D_HUMAN	P0DP04	4	7	28	118	13017	Immunoglobulin heavy variable 3-43D OS=Homo sapiens OX=9606 GN=IGHV3-43D PE=3 SV=1	0.0023	0.9055
sp|P13987|CD59_HUMAN	P13987	5	7	25.8	128	14177	CD59 glycoprotein OS=Homo sapiens OX=9606 GN=CD59 PE=1 SV=1	0.0022	0.8113
sp|P35900|K1C20_HUMAN	P35900	5	7	4.5	424	48487	Keratin, type I cytoskeletal 20 OS=Homo sapiens OX=9606 GN=KRT20 PE=1 SV=1	0.0007	0.1092
sp|P59665|DEF1_HUMAN;sp|P59666|DEF3_HUMAN	P59665;P59666	6	7	20.2	94	10201	Neutrophil defensin 1 OS=Homo sapiens OX=9606 GN=DEFA1 PE=1 SV=1	0.0029	0.5922
sp|P62805|H4_HUMAN	P62805	3	7	32	103	11367	Histone H4 OS=Homo sapiens OX=9606 GN=H4C1 PE=1 SV=2	0.0027	1.0893
sp|P63104|1433Z_HUMAN	P63104	3	7	15.5	245	27745	14-3-3 protein zeta/delta OS=Homo sapiens OX=9606 GN=YWHAZ PE=1 SV=1	0.0011	0.4289
sp|Q8N1N4|K2C78_HUMAN	Q8N1N4	5	7	5.8	520	56866	Keratin, type II cytoskeletal 78 OS=Homo sapiens OX=9606 GN=KRT78 PE=1 SV=2	0.0005	0.1429
sp|A0A0J9YX35|HV64D_HUMAN	A0A0J9YX35	5	6	28.2	117	12823	Immunoglobulin heavy variable 3-64D OS=Homo sapiens OX=9606 GN=IGHV3-64D PE=3 SV=1	0.002	0.9143
sp|P01597|KV139_HUMAN;sp|P04432|KVD39_HUMAN	P01597;P04432	3	6	36.8	117	12737	Immunoglobulin kappa variable 1-39 OS=Homo sapiens OX=9606 GN=IGKV1-39 PE=1 SV=2	0.002	1.3335
sp|P07602|SAP_HUMAN	P07602	5	6	13.2	524	58113	Prosaposin OS=Homo sapiens OX=9606 GN=PSAP PE=1 SV=2	0.0005	0.3552
sp|P26447|S10A4_HUMAN	P26447	6	6	31.7	101	11728	Protein S100-A4 OS=Homo sapiens OX=9606 GN=S100A4 PE=1 SV=1	0.0023	1.0749
sp|A0A0A0MS15|HV349_HUMAN	A0A0A0MS15	4	5	31.9	119	13056	Immunoglobulin heavy variable 3-49 OS=Homo sapiens OX=9606 GN=IGHV3-49 PE=3 SV=1	0.0017	1.0845
sp|A0A0C4DH25|KVD20_HUMAN	A0A0C4DH25	3	5	27.6	116	12515	Immunoglobulin kappa variable 3D-20 OS=Homo sapiens OX=9606 GN=IGKV3D-20 PE=3 SV=1	0.0017	0.888
sp|P01766|HV313_HUMAN	P01766	3	5	25	116	12506	Immunoglobulin heavy variable 3-13 OS=Homo sapiens OX=9606 GN=IGHV3-13 PE=1 SV=2	0.0017	0.7783
sp|P06733|ENOA_HUMAN	P06733	4	5	7.8	434	47169	Alpha-enolase OS=Homo sapiens OX=9606 GN=ENO1 PE=1 SV=2	0.0005	0.1967
sp|P09211|GSTP1_HUMAN	P09211	2	5	12.4	210	23356	Glutathione S-transferase P OS=Homo sapiens OX=9606 GN=GSTP1 PE=1 SV=2	0.0009	0.3305
sp|P14314|GLU2B_HUMAN	P14314	3	5	5.9	528	59425	Glucosidase 2 subunit beta OS=Homo sapiens OX=9606 GN=PRKCSH PE=1 SV=2	0.0004	0.1455
sp|P14923|PLAK_HUMAN	P14923	5	5	8.3	745	81745	Junction plakoglobin OS=Homo sapiens OX=9606 GN=JUP PE=1 SV=3	0.0003	0.2106
sp|P31749|AKT1_HUMAN;sp|Q9Y243|AKT3_HUMAN;sp|P31751|AKT2_HUMAN	P31749;Q9Y243;P31751	1	5	3.3	480	55686	RAC-alpha serine/threonine-protein kinase OS=Homo sapiens OX=9606 GN=AKT1 PE=1 SV=2	0.0004	0.0789
sp|P31949|S10AB_HUMAN	P31949	5	5	56.2	105	11740	Protein S100-A11 OS=Homo sapiens OX=9606 GN=S100A11 PE=1 SV=2	0.0019	2.6475
sp|P49792|RBP2_HUMAN	P49792	2	5	0.8	3224	358201	E3 SUMO-protein ligase RanBP2 OS=Homo sapiens OX=9606 GN=RANBP2 PE=1 SV=2	0.0001	0.0186
sp|P98088|MUC5A_HUMAN	P98088	4	5	1.5	5654	585574	Mucin-5AC OS=Homo sapiens OX=9606 GN=MUC5AC PE=1 SV=4	0	0.0351
sp|Q14697|GANAB_HUMAN	Q14697	4	5	5.7	944	106874	Neutral alpha-glucosidase AB OS=Homo sapiens OX=9606 GN=GANAB PE=1 SV=3	0.0002	0.1402
sp|Q16630|CPSF6_HUMAN	Q16630	1	5	2	551	59210	Cleavage and polyadenylation specificity factor subunit 6 OS=Homo sapiens OX=9606 GN=CPSF6 PE=1 SV=2	0.0004	0.0471
sp|Q6MZM9|PRR27_HUMAN	Q6MZM9	3	5	24.2	219	22720	Proline-rich protein 27 OS=Homo sapiens OX=9606 GN=PRR27 PE=2 SV=1	0.0009	0.7458
sp|Q92743|HTRA1_HUMAN	Q92743	2	5	4.2	480	51287	Serine protease HTRA1 OS=Homo sapiens OX=9606 GN=HTRA1 PE=1 SV=1	0.0004	0.1015
sp|A0A075B6K4|LV310_HUMAN	A0A075B6K4	2	4	16.5	115	12441	Immunoglobulin lambda variable 3-10 OS=Homo sapiens OX=9606 GN=IGLV3-10 PE=3 SV=2	0.0014	0.4622
sp|A0A075B6R2|HV404_HUMAN;sp|P0DP08|HVD82_HUMAN;sp|P0DP07|HV431_HUMAN;sp|P0DP06|HVD34_HUMAN;sp|P06331|HV434_HUMAN;sp|P01825|HV459_HUMAN;sp|P01824|HV439_HUMAN;sp|A0A0C4DH41|HV461_HUMAN;sp|A0A087WSY4|HV432_HUMAN	A0A075B6R2;P0DP08;P0DP07;P0DP06;P06331;P01825;P01824;A0A0C4DH41;A0A087WSY4	3	4	18.8	117	12848	Immunoglobulin heavy variable 4-4 OS=Homo sapiens OX=9606 GN=IGHV4-4 PE=3 SV=2	0.0013	0.5417
sp|A0A075B6R9|KVD24_HUMAN;sp|A0A0C4DH68|KV224_HUMAN	A0A075B6R9;A0A0C4DH68	3	4	16.7	120	13079	Probable non-functional immunoglobulin kappa variable 2D-24 OS=Homo sapiens OX=9606 GN=IGKV2D-24 PE=1 SV=1	0.0013	0.4689
sp|A0A0C4DH36|HV338_HUMAN	A0A0C4DH36	3	4	19	116	12759	Probable non-functional immunoglobulin heavy variable 3-38 OS=Homo sapiens OX=9606 GN=IGHV3-38 PE=1 SV=1	0.0014	0.5488
sp|A0A0C4DH67|KV108_HUMAN;sp|A0A0C4DH69|KV109_HUMAN	A0A0C4DH67;A0A0C4DH69	3	4	37.4	115	12537	Immunoglobulin kappa variable 1-8 OS=Homo sapiens OX=9606 GN=IGKV1-8 PE=3 SV=1	0.0014	1.3659
sp|Q96LB3|IFT74_HUMAN	Q96LB3	1	4	2.5	600	69239	Intraflagellar transport protein 74 homolog OS=Homo sapiens OX=9606 GN=IFT74 PE=1 SV=1	0.0003	0.0593
sp|A0A075B6K5|LV39_HUMAN;sp|P80748|LV321_HUMAN	A0A075B6K5;P80748	1	3	13.9	115	12332	Immunoglobulin lambda variable 3-9 OS=Homo sapiens OX=9606 GN=IGLV3-9 PE=3 SV=1	0.001	0.3772
sp|A0A075B6S2|KVD29_HUMAN;sp|A2NJV5|KV229_HUMAN;sp|A0A0A0MRZ7|KVD26_HUMAN	A0A075B6S2;A2NJV5;A0A0A0MRZ7	3	3	16.7	120	13143	Immunoglobulin kappa variable 2D-29 OS=Homo sapiens OX=9606 GN=IGKV2D-29 PE=3 SV=1	0.001	0.4689
sp|A0A0A0MT36|KVD21_HUMAN	A0A0A0MT36	2	3	15.8	114	12340	Immunoglobulin kappa variable 6D-21 OS=Homo sapiens OX=9606 GN=IGKV6D-21 PE=3 SV=1	0.001	0.4388
sp|A6NKT7|RGPD3_HUMAN	A6NKT7	2	3	1.5	1758	197486	RanBP2-like and GRIP domain-containing protein 3 OS=Homo sapiens OX=9606 GN=RGPD3 PE=3 SV=2	0.0001	0.0351
sp|O60814|H2B1K_HUMAN;sp|Q99880|H2B1L_HUMAN;sp|Q99879|H2B1M_HUMAN;sp|Q99877|H2B1N_HUMAN;sp|Q93079|H2B1H_HUMAN;sp|Q8N257|H2B3B_HUMAN;sp|Q5QNW6|H2B2F_HUMAN;sp|Q16778|H2B2E_HUMAN;sp|P62807|H2B1C_HUMAN;sp|P58876|H2B1D_HUMAN;sp|P57053|H2BFS_HUMAN;sp|P33778|H2B1B_HUMAN;sp|P23527|H2B1O_HUMAN;sp|P06899|H2B1J_HUMAN	O60814;Q99880;Q99879;Q99877;Q93079;Q8N257;Q5QNW6;Q16778;P62807;P58876;P57053;P33778;P23527;P06899	2	3	19	126	13890	Histone H2B type 1-K OS=Homo sapiens OX=9606 GN=H2BC12 PE=1 SV=3	0.0009	0.5488
sp|P01593|KVD33_HUMAN;sp|P01594|KV133_HUMAN	P01593;P01594	1	3	13.7	117	12848	Immunoglobulin kappa variable 1D-33 OS=Homo sapiens OX=9606 GN=IGKV1D-33 PE=1 SV=2	0.001	0.3709
sp|P06310|KV230_HUMAN	P06310	2	3	16.7	120	13185	Immunoglobulin kappa variable 2-30 OS=Homo sapiens OX=9606 GN=IGKV2-30 PE=3 SV=2	0.001	0.4689
sp|P08603|CFAH_HUMAN	P08603	3	3	3.2	1231	139096	Complement factor H OS=Homo sapiens OX=9606 GN=CFH PE=1 SV=4	0.0001	0.0765
sp|P10599|THIO_HUMAN	P10599	2	3	20	105	11737	Thioredoxin OS=Homo sapiens OX=9606 GN=TXN PE=1 SV=3	0.0011	0.5849
sp|P12830|CADH1_HUMAN	P12830	2	3	2	882	97456	Cadherin-1 OS=Homo sapiens OX=9606 GN=CDH1 PE=1 SV=3	0.0001	0.0471
sp|P28799|GRN_HUMAN	P28799	2	3	5.2	593	63545	Progranulin OS=Homo sapiens OX=9606 GN=GRN PE=1 SV=2	0.0002	0.1272
sp|P30740|ILEU_HUMAN	P30740	3	3	11.6	379	42742	Leukocyte elastase inhibitor OS=Homo sapiens OX=9606 GN=SERPINB1 PE=1 SV=1	0.0003	0.3062
sp|P62937|PPIA_HUMAN	P62937	2	3	15.8	165	18012	Peptidyl-prolyl cis-trans isomerase A OS=Homo sapiens OX=9606 GN=PPIA PE=1 SV=2	0.0007	0.4388
sp|P68104|EF1A1_HUMAN;sp|Q5VTE0|EF1A3_HUMAN;sp|Q05639|EF1A2_HUMAN	P68104;Q5VTE0;Q05639	1	3	2.4	462	50141	Elongation factor 1-alpha 1 OS=Homo sapiens OX=9606 GN=EEF1A1 PE=1 SV=1	0.0003	0.0568
sp|Q08554|DSC1_HUMAN	Q08554	1	3	1.9	894	99987	Desmocollin-1 OS=Homo sapiens OX=9606 GN=DSC1 PE=1 SV=2	0.0001	0.0447
sp|Q14508|WFDC2_HUMAN	Q14508	1	3	11.3	124	12993	WAP four-disulfide core domain protein 2 OS=Homo sapiens OX=9606 GN=WFDC2 PE=1 SV=2	0.001	0.2972
sp|Q14515|SPRL1_HUMAN	Q14515	2	3	3.5	664	75208	SPARC-like protein 1 OS=Homo sapiens OX=9606 GN=SPARCL1 PE=1 SV=2	0.0002	0.0839
sp|Q16651|PRSS8_HUMAN	Q16651	2	3	9.6	343	36431	Prostasin OS=Homo sapiens OX=9606 GN=PRSS8 PE=1 SV=1	0.0003	0.2474
sp|Q6NUJ1|SAPL1_HUMAN	Q6NUJ1	1	3	2.1	521	56627	Proactivator polypeptide-like 1 OS=Homo sapiens OX=9606 GN=PSAPL1 PE=2 SV=2	0.0002	0.0495
sp|Q6UXB3|LYPD2_HUMAN	Q6UXB3	1	3	11.2	125	13115	Ly6/PLAUR domain-containing protein 2 OS=Homo sapiens OX=9606 GN=LYPD2 PE=1 SV=1	0.0009	0.2942
sp|A0A075B6I0|LV861_HUMAN	A0A075B6I0	2	2	13.1	122	12814	Immunoglobulin lambda variable 8-61 OS=Homo sapiens OX=9606 GN=IGLV8-61 PE=3 SV=7	0.0006	0.3521
sp|A0A0B4J2H0|HV69D_HUMAN;sp|P0DP01|HV108_HUMAN;sp|P01743|HV146_HUMAN;sp|P01742|HV169_HUMAN;sp|A0A0C4DH29|HV103_HUMAN	A0A0B4J2H0;P0DP01;P01743;P01742;A0A0C4DH29	1	2	9.4	117	12660	Immunoglobulin heavy variable 1-69D OS=Homo sapiens OX=9606 GN=IGHV1-69D PE=1 SV=1	0.0007	0.2417
sp|A0A0C4DH31|HV118_HUMAN	A0A0C4DH31	2	2	12	117	12820	Immunoglobulin heavy variable 1-18 OS=Homo sapiens OX=9606 GN=IGHV1-18 PE=3 SV=1	0.0007	0.3183
sp|A0A0J9YXX1|HV5X1_HUMAN	A0A0J9YXX1	2	2	15.4	117	12773	Immunoglobulin heavy variable 5-10-1 OS=Homo sapiens OX=9606 GN=IGHV5-10-1 PE=3 SV=1	0.0007	0.4256
sp|O00584|RNT2_HUMAN	O00584	2	2	9.4	256	29481	Ribonuclease T2 OS=Homo sapiens OX=9606 GN=RNASET2 PE=1 SV=2	0.0003	0.2417
sp|O14773|TPP1_HUMAN	O14773	1	2	2.5	563	61248	Tripeptidyl-peptidase 1 OS=Homo sapiens OX=9606 GN=TPP1 PE=1 SV=2	0.0001	0.0593
sp|P01700|LV147_HUMAN	P01700	1	2	11.1	117	12284	Immunoglobulin lambda variable 1-47 OS=Homo sapiens OX=9606 GN=IGLV1-47 PE=1 SV=2	0.0007	0.2912
sp|P02765|FETUA_HUMAN	P02765	1	2	5.4	367	39341	Alpha-2-HS-glycoprotein OS=Homo sapiens OX=9606 GN=AHSG PE=1 SV=2	0.0002	0.1324
sp|P03950|ANGI_HUMAN	P03950	2	2	17	147	16550	Angiogenin OS=Homo sapiens OX=9606 GN=ANG PE=1 SV=1	0.0005	0.4791
sp|P04746|AMYP_HUMAN;sp|P19961|AMY2B_HUMAN;sp|P0DUB6|AMY1A_HUMAN;sp|P0DTE8|AMY1C_HUMAN;sp|P0DTE7|AMY1B_HUMAN	P04746;P19961;P0DUB6;P0DTE8;P0DTE7	2	2	6.8	511	57707	Pancreatic alpha-amylase OS=Homo sapiens OX=9606 GN=AMY2A PE=1 SV=2	0.0002	0.1695
sp|P05090|APOD_HUMAN	P05090	2	2	9.5	189	21276	Apolipoprotein D OS=Homo sapiens OX=9606 GN=APOD PE=1 SV=1	0.0004	0.2445
sp|P07711|CATL1_HUMAN	P07711	1	2	3.6	333	37564	Procathepsin L OS=Homo sapiens OX=9606 GN=CTSL PE=1 SV=2	0.0002	0.0864
sp|P60174|TPIS_HUMAN	P60174	2	2	9.2	249	26669	Triosephosphate isomerase OS=Homo sapiens OX=9606 GN=TPI1 PE=1 SV=4	0.0003	0.2359
sp|P68431|H31_HUMAN;sp|Q71DI3|H32_HUMAN;sp|Q16695|H31T_HUMAN;sp|P84243|H33_HUMAN	P68431;Q71DI3;Q16695;P84243	1	2	8.1	136	15404	Histone H3.1 OS=Homo sapiens OX=9606 GN=H3C1 PE=1 SV=2	0.0006	0.205
sp|Q01469|FABP5_HUMAN	Q01469	1	2	10.4	135	15164	Fatty acid-binding protein 5 OS=Homo sapiens OX=9606 GN=FABP5 PE=1 SV=3	0.0006	0.2706
sp|Q02413|DSG1_HUMAN	Q02413	2	2	2.8	1049	113748	Desmoglein-1 OS=Homo sapiens OX=9606 GN=DSG1 PE=1 SV=2	0.0001	0.0666
sp|Q2M3V2|SWAHA_HUMAN	Q2M3V2	1	2	1.6	549	57409	Ankyrin repeat domain-containing protein SOWAHA OS=Homo sapiens OX=9606 GN=SOWAHA PE=1 SV=4	0.0001	0.0375
sp|Q5D862|FILA2_HUMAN	Q5D862	1	2	0.5	2391	248072	Filaggrin-2 OS=Homo sapiens OX=9606 GN=FLG2 PE=1 SV=1	0	0.0116
sp|Q5SXM1|ZN678_HUMAN	Q5SXM1	1	2	1.5	525	61411	Zinc finger protein 678 OS=Homo sapiens OX=9606 GN=ZNF678 PE=2 SV=1	0.0002	0.0351
sp|Q6P6B7|ANR16_HUMAN	Q6P6B7	1	2	3.6	361	39284	Ankyrin repeat domain-containing protein 16 OS=Homo sapiens OX=9606 GN=ANKRD16 PE=1 SV=1	0.0002	0.0864
sp|Q86YZ3|HORN_HUMAN	Q86YZ3	2	2	4.4	2850	282389	Hornerin OS=Homo sapiens OX=9606 GN=HRNR PE=1 SV=2	0	0.1066
sp|Q8WXG9|AGRV1_HUMAN	Q8WXG9	1	2	0.1	6306	693082	Adhesion G-protein coupled receptor V1 OS=Homo sapiens OX=9606 GN=ADGRV1 PE=1 SV=2	0	0.0023
sp|Q9UBC9|SPRR3_HUMAN	Q9UBC9	1	2	8.9	169	18154	Small proline-rich protein 3 OS=Homo sapiens OX=9606 GN=SPRR3 PE=1 SV=2	0.0005	0.2274
sp|Q9UJF2|NGAP_HUMAN	Q9UJF2	1	2	1.2	1139	128557	Ras GTPase-activating protein nGAP OS=Homo sapiens OX=9606 GN=RASAL2 PE=1 SV=2	0.0001	0.028
sp|A0A0C4DH35|HV335_HUMAN	A0A0C4DH35	1	1	9.4	117	12810	Probable non-functional immunoglobulin heavy variable 3-35 OS=Homo sapiens OX=9606 GN=IGHV3-35 PE=1 SV=1	0.0003	0.2417
sp|A0A1B0GTS1|HSFX4_HUMAN;sp|A0A1B0GWH4|HSFX3_HUMAN	A0A1B0GTS1;A0A1B0GWH4	1	1	2.4	333	37155	Heat shock transcription factor, X-linked member 4 OS=Homo sapiens OX=9606 GN=HSFX4 PE=3 SV=1	0.0001	0.0568
sp|O43653|PSCA_HUMAN	O43653	1	1	8.8	114	11959	Prostate stem cell antigen OS=Homo sapiens OX=9606 GN=PSCA PE=1 SV=2	0.0003	0.2246
sp|P00338|LDHA_HUMAN;sp|Q6ZMR3|LDH6A_HUMAN;sp|P07864|LDHC_HUMAN;sp|P07195|LDHB_HUMAN	P00338;Q6ZMR3;P07864;P07195	1	1	3.6	332	36689	L-lactate dehydrogenase A chain OS=Homo sapiens OX=9606 GN=LDHA PE=1 SV=2	0.0001	0.0864
sp|P02652|APOA2_HUMAN	P02652	1	1	10	100	11175	Apolipoprotein A-II OS=Homo sapiens OX=9606 GN=APOA2 PE=1 SV=1	0.0004	0.2589
sp|P02790|HEMO_HUMAN	P02790	1	1	2.4	462	51676	Hemopexin OS=Homo sapiens OX=9606 GN=HPX PE=1 SV=2	0.0001	0.0568
sp|P04908|H2A1B_HUMAN;sp|Q9BTM1|H2AJ_HUMAN;sp|Q99878|H2A1J_HUMAN;sp|Q96QV6|H2A1A_HUMAN;sp|Q96KK5|H2A1H_HUMAN;sp|Q93077|H2A1C_HUMAN;sp|Q8IUE6|H2A2B_HUMAN;sp|Q7L7L0|H2A3_HUMAN;sp|Q71UI9|H2AV_HUMAN;sp|Q6FI13|H2A2A_HUMAN;sp|Q16777|H2A2C_HUMAN;sp|P20671|H2A1D_HUMAN;sp|P16104|H2AX_HUMAN;sp|P0C0S8|H2A1_HUMAN;sp|P0C0S5|H2AZ_HUMAN	P04908;Q9BTM1;Q99878;Q96QV6;Q96KK5;Q93077;Q8IUE6;Q7L7L0;Q71UI9;Q6FI13;Q16777;P20671;P16104;P0C0S8;P0C0S5	1	1	6.9	130	14135	Histone H2A type 1-B/E OS=Homo sapiens OX=9606 GN=H2AC4 PE=1 SV=2	0.0003	0.1722
sp|P05186|PPBT_HUMAN	P05186	1	1	2.7	524	57305	Alkaline phosphatase, tissue-nonspecific isozyme OS=Homo sapiens OX=9606 GN=ALPL PE=1 SV=4	0.0001	0.0641
sp|P08571|CD14_HUMAN	P08571	1	1	4.8	375	40076	Monocyte differentiation antigen CD14 OS=Homo sapiens OX=9606 GN=CD14 PE=1 SV=2	0.0001	0.1169
sp|P0DJI8|SAA1_HUMAN;sp|P0DJI9|SAA2_HUMAN	P0DJI8;P0DJI9	1	1	11.5	122	13532	Serum amyloid A-1 protein OS=Homo sapiens OX=9606 GN=SAA1 PE=1 SV=1	0.0003	0.3032
sp|P0DMV8|HS71A_HUMAN;sp|P54652|HSP72_HUMAN;sp|P48741|HSP77_HUMAN;sp|P34931|HS71L_HUMAN;sp|P17066|HSP76_HUMAN;sp|P11142|HSP7C_HUMAN;sp|P11021|BIP_HUMAN;sp|P0DMV9|HS71B_HUMAN	P0DMV8;P54652;P48741;P34931;P17066;P11142;P11021;P0DMV9	1	1	1.7	641	70052	Heat shock 70 kDa protein 1A OS=Homo sapiens OX=9606 GN=HSPA1A PE=1 SV=1	0.0001	0.0399
sp|P21926|CD9_HUMAN	P21926	1	1	4.4	228	25416	CD9 antigen OS=Homo sapiens OX=9606 GN=CD9 PE=1 SV=4	0.0002	0.1066
sp|Q5T2L2|AKCL1_HUMAN	Q5T2L2	1	1	9.3	129	14588	Putative aldo-keto reductase family 1 member C8 OS=Homo sapiens OX=9606 GN=AKR1C8 PE=5 SV=2	0.0003	0.2388
sp|Q5T750|KPLCE_HUMAN	Q5T750	1	1	3.6	250	26238	Protein KPLCE OS=Homo sapiens OX=9606 GN=KPLCE PE=1 SV=1	0.0002	0.0864
sp|Q86X29|LSR_HUMAN	Q86X29	1	1	1.7	649	71439	Lipolysis-stimulated lipoprotein receptor OS=Homo sapiens OX=9606 GN=LSR PE=1 SV=4	0.0001	0.0399
sp|Q8NA19|LMBL4_HUMAN	Q8NA19	1	1	2.9	623	71122	Lethal(3)malignant brain tumor-like protein 4 OS=Homo sapiens OX=9606 GN=L3MBTL4 PE=1 SV=2	0.0001	0.0691
sp|Q96DR8|MUCL1_HUMAN	Q96DR8	1	1	10	90	9039	Mucin-like protein 1 OS=Homo sapiens OX=9606 GN=MUCL1 PE=1 SV=1	0.0004	0.2589
sp|Q9UBG3|CRNN_HUMAN	Q9UBG3	1	1	3.2	495	53533	Cornulin OS=Homo sapiens OX=9606 GN=CRNN PE=1 SV=1	0.0001	0.0765
sp|Q9Y5F7|PCDGL_HUMAN	Q9Y5F7	1	1	1.6	938	101214	Protocadherin gamma-C4 OS=Homo sapiens OX=9606 GN=PCDHGC4 PE=1 SV=1	0	0.0375

## Sheet: 9) 200ng-44min#3(190)
Protein Group Name	Protein Accession	Number Stripped Peptides	Number PSMs	Protein Coverage	Protein Length	Protein Molecular Weight	Protein Description	NSAF Score	EmPAI Score
sp|P02788|TRFL_HUMAN	P02788	186	1066	89	710	78182	Lactotransferrin OS=Homo sapiens OX=9606 GN=LTF PE=1 SV=6	0.0575	6.7625
sp|P31025|LCN1_HUMAN	P31025	57	323	78.4	176	19250	Lipocalin-1 OS=Homo sapiens OX=9606 GN=LCN1 PE=1 SV=1	0.0703	5.0814
sp|P61626|LYSC_HUMAN	P61626	49	299	85.1	148	16537	Lysozyme C OS=Homo sapiens OX=9606 GN=LYZ PE=1 SV=1	0.0774	6.0958
sp|P01833|PIGR_HUMAN	P01833	88	246	59.9	764	83284	Polymeric immunoglobulin receptor OS=Homo sapiens OX=9606 GN=PIGR PE=1 SV=4	0.0123	2.9719
sp|P02768|ALBU_HUMAN	P02768	113	237	90.1	609	69367	Albumin OS=Homo sapiens OX=9606 GN=ALB PE=1 SV=2	0.0149	6.9616
sp|P12273|PIP_HUMAN	P12273	31	229	77.4	146	16572	Prolactin-inducible protein OS=Homo sapiens OX=9606 GN=PIP PE=1 SV=1	0.0601	4.9429
sp|P01876|IGHA1_HUMAN	P01876	39	221	62.3	398	42849	Immunoglobulin heavy constant alpha 1 OS=Homo sapiens OX=9606 GN=IGHA1 PE=1 SV=3	0.0213	3.1976
sp|P25311|ZA2G_HUMAN	P25311	45	180	64.8	298	34259	Zinc-alpha-2-glycoprotein OS=Homo sapiens OX=9606 GN=AZGP1 PE=1 SV=2	0.0231	3.4463
sp|P04264|K2C1_HUMAN	P04264	70	163	64.3	644	66039	Keratin, type II cytoskeletal 1 OS=Homo sapiens OX=9606 GN=KRT1 PE=1 SV=6	0.0097	3.3954
sp|Q9GZZ8|LACRT_HUMAN	Q9GZZ8	26	145	39.9	138	14246	Extracellular glycoprotein lacritin OS=Homo sapiens OX=9606 GN=LACRT PE=1 SV=1	0.0402	1.5061
sp|P0DOX2|IGA2_HUMAN	P0DOX2	24	135	39.8	455	48934	Immunoglobulin alpha-2 heavy chain OS=Homo sapiens OX=9606 PE=1 SV=2	0.0114	1.5003
sp|P01834|IGKC_HUMAN	P01834	21	128	97.2	107	11765	Immunoglobulin kappa constant OS=Homo sapiens OX=9606 GN=IGKC PE=1 SV=2	0.0458	8.3756
sp|P01877|IGHA2_HUMAN	P01877	17	124	31.5	391	42334	Immunoglobulin heavy constant alpha 2 OS=Homo sapiens OX=9606 GN=IGHA2 PE=1 SV=5	0.0121	1.0654
sp|P01024|CO3_HUMAN	P01024	79	122	38.1	1663	187147	Complement C3 OS=Homo sapiens OX=9606 GN=C3 PE=1 SV=2	0.0028	1.4044
sp|Q16378|PROL4_HUMAN	Q16378	16	116	37.3	134	15097	Proline-rich protein 4 OS=Homo sapiens OX=9606 GN=PRR4 PE=1 SV=3	0.0332	1.3605
sp|O75556|SG2A1_HUMAN	O75556	25	112	73.7	95	10884	Mammaglobin-B OS=Homo sapiens OX=9606 GN=SCGB2A1 PE=1 SV=1	0.0452	4.4576
sp|P35527|K1C9_HUMAN	P35527	46	106	61.3	623	62064	Keratin, type I cytoskeletal 9 OS=Homo sapiens OX=9606 GN=KRT9 PE=1 SV=3	0.0065	3.102
sp|Q9UGM3|DMBT1_HUMAN	Q9UGM3	39	105	39.2	2413	260734	Deleted in malignant brain tumors 1 protein OS=Homo sapiens OX=9606 GN=DMBT1 PE=1 SV=2	0.0017	1.466
sp|P01036|CYTS_HUMAN	P01036	21	99	76.6	141	16214	Cystatin-S OS=Homo sapiens OX=9606 GN=CST4 PE=1 SV=3	0.0269	4.8345
sp|P13645|K1C10_HUMAN	P13645	51	96	58.7	584	58827	Keratin, type I cytoskeletal 10 OS=Homo sapiens OX=9606 GN=KRT10 PE=1 SV=6	0.0063	2.8637
sp|P35908|K22E_HUMAN	P35908	55	95	64.3	639	65433	Keratin, type II cytoskeletal 2 epidermal OS=Homo sapiens OX=9606 GN=KRT2 PE=1 SV=2	0.0057	3.3954
sp|P0DOX7|IGK_HUMAN	P0DOX7	20	94	65	214	23379	Immunoglobulin kappa light chain OS=Homo sapiens OX=9606 PE=1 SV=1	0.0168	3.4668
sp|Q99935|PROL1_HUMAN	Q99935	11	92	31.9	248	27216	Opiorphin prepropeptide OS=Homo sapiens OX=9606 GN=OPRPN PE=1 SV=2	0.0142	1.0845
sp|P13647|K2C5_HUMAN	P13647	53	91	49	590	62378	Keratin, type II cytoskeletal 5 OS=Homo sapiens OX=9606 GN=KRT5 PE=1 SV=3	0.0059	2.0903
sp|P98160|PGBM_HUMAN	P98160	61	89	15.9	4391	468835	Basement membrane-specific heparan sulfate proteoglycan core protein OS=Homo sapiens OX=9606 GN=HSPG2 PE=1 SV=4	0.0008	0.4421
sp|P0DOY3|IGLC3_HUMAN	P0DOY3	20	87	93.4	106	11266	Immunoglobulin lambda constant 3 OS=Homo sapiens OX=9606 GN=IGLC3 PE=1 SV=1	0.0314	7.5901
sp|P02538|K2C6A_HUMAN	P02538	49	84	52.3	564	60045	Keratin, type II cytoskeletal 6A OS=Homo sapiens OX=9606 GN=KRT6A PE=1 SV=3	0.0057	2.3343
sp|P48668|K2C6C_HUMAN	P48668	48	82	50.5	564	60025	Keratin, type II cytoskeletal 6C OS=Homo sapiens OX=9606 GN=KRT6C PE=1 SV=3	0.0056	2.1989
sp|P04259|K2C6B_HUMAN	P04259	45	78	45.9	564	60067	Keratin, type II cytoskeletal 6B OS=Homo sapiens OX=9606 GN=KRT6B PE=1 SV=5	0.0053	1.8774
sp|P01591|IGJ_HUMAN	P01591	22	71	69.8	159	18099	Immunoglobulin J chain OS=Homo sapiens OX=9606 GN=JCHAIN PE=1 SV=4	0.0171	3.9888
sp|O95968|SG1D1_HUMAN	O95968	21	69	46.7	90	9898	Secretoglobin family 1D member 1 OS=Homo sapiens OX=9606 GN=SCGB1D1 PE=1 SV=1	0.0294	1.9309
sp|B9A064|IGLL5_HUMAN;sp|P0DOX8|IGL1_HUMAN	B9A064;P0DOX8	14	67	50	214	23063	Immunoglobulin lambda-like polypeptide 5 OS=Homo sapiens OX=9606 GN=IGLL5 PE=1 SV=2	0.012	2.1623
sp|Q13421|MSLN_HUMAN	Q13421	28	63	37	630	68986	Mesothelin OS=Homo sapiens OX=9606 GN=MSLN PE=1 SV=2	0.0038	1.3442
sp|P02533|K1C14_HUMAN	P02533	35	62	52.5	472	51561	Keratin, type I cytoskeletal 14 OS=Homo sapiens OX=9606 GN=KRT14 PE=1 SV=4	0.005	2.3497
sp|P01037|CYTN_HUMAN	P01037	15	60	66	141	16388	Cystatin-SN OS=Homo sapiens OX=9606 GN=CST1 PE=1 SV=3	0.0163	3.5709
sp|P10909|CLUS_HUMAN	P10909	31	57	37.4	449	52495	Clusterin OS=Homo sapiens OX=9606 GN=CLU PE=1 SV=1	0.0049	1.3659
sp|P13646|K1C13_HUMAN	P13646	35	56	59	458	49588	Keratin, type I cytoskeletal 13 OS=Homo sapiens OX=9606 GN=KRT13 PE=1 SV=4	0.0047	2.8905
sp|P14555|PA2GA_HUMAN	P14555	16	51	58.3	144	16083	Phospholipase A2, membrane associated OS=Homo sapiens OX=9606 GN=PLA2G2A PE=1 SV=2	0.0136	2.8282
sp|P01871|IGHM_HUMAN	P01871	22	40	38.2	474	51924	Immunoglobulin heavy constant mu OS=Homo sapiens OX=9606 GN=IGHM PE=1 SV=5	0.0032	1.4099
sp|P22079|PERL_HUMAN	P22079	25	40	38.3	712	80288	Lactoperoxidase OS=Homo sapiens OX=9606 GN=LPO PE=1 SV=2	0.0022	1.4155
sp|P61769|B2MG_HUMAN	P61769	17	38	78.2	119	13715	Beta-2-microglobulin OS=Homo sapiens OX=9606 GN=B2M PE=1 SV=1	0.0122	5.0534
sp|P60709|ACTB_HUMAN;sp|P63261|ACTG_HUMAN	P60709;P63261	20	37	49.1	375	41737	Actin, cytoplasmic 1 OS=Homo sapiens OX=9606 GN=ACTB PE=1 SV=1	0.0038	2.0974
sp|Q04695|K1C17_HUMAN	Q04695	19	37	24.5	432	48106	Keratin, type I cytoskeletal 17 OS=Homo sapiens OX=9606 GN=KRT17 PE=1 SV=2	0.0033	0.7579
sp|P03973|SLPI_HUMAN	P03973	16	36	74.2	132	14326	Antileukoproteinase OS=Homo sapiens OX=9606 GN=SLPI PE=1 SV=2	0.0104	4.5208
sp|P02787|TRFE_HUMAN	P02787	23	33	34.8	698	77050	Serotransferrin OS=Homo sapiens OX=9606 GN=TF PE=1 SV=4	0.0018	1.2284
sp|P0DOX6|IGM_HUMAN	P0DOX6	18	33	25.5	576	63486	Immunoglobulin mu heavy chain OS=Homo sapiens OX=9606 PE=1 SV=2	0.0022	0.7989
sp|P19013|K2C4_HUMAN	P19013	22	33	38.1	520	56144	Keratin, type II cytoskeletal 4 OS=Homo sapiens OX=9606 GN=KRT4 PE=1 SV=5	0.0024	1.4044
sp|P00738|HPT_HUMAN	P00738	18	32	38.7	406	45205	Haptoglobin OS=Homo sapiens OX=9606 GN=HP PE=1 SV=1	0.003	1.4378
sp|P19012|K1C15_HUMAN	P19012	16	32	20.4	456	49212	Keratin, type I cytoskeletal 15 OS=Homo sapiens OX=9606 GN=KRT15 PE=1 SV=3	0.0027	0.5996
sp|P08727|K1C19_HUMAN	P08727	18	31	44	400	44106	Keratin, type I cytoskeletal 19 OS=Homo sapiens OX=9606 GN=KRT19 PE=1 SV=4	0.003	1.7542
sp|Q5XKE5|K2C79_HUMAN	Q5XKE5	17	30	14.8	535	57836	Keratin, type II cytoskeletal 79 OS=Homo sapiens OX=9606 GN=KRT79 PE=1 SV=2	0.0021	0.406
sp|P12035|K2C3_HUMAN	P12035	20	29	13.2	628	64417	Keratin, type II cytoskeletal 3 OS=Homo sapiens OX=9606 GN=KRT3 PE=1 SV=3	0.0018	0.3552
sp|Q01546|K22O_HUMAN	Q01546	18	28	11.9	638	65841	Keratin, type II cytoskeletal 2 oral OS=Homo sapiens OX=9606 GN=KRT76 PE=1 SV=2	0.0017	0.3152
sp|Q08380|LG3BP_HUMAN	Q08380	20	28	34.7	585	65331	Galectin-3-binding protein OS=Homo sapiens OX=9606 GN=LGALS3BP PE=1 SV=1	0.0018	1.2233
sp|P80188|NGAL_HUMAN	P80188	14	22	68.2	198	22588	Neutrophil gelatinase-associated lipocalin OS=Homo sapiens OX=9606 GN=LCN2 PE=1 SV=2	0.0043	3.8084
sp|Q8N474|SFRP1_HUMAN	Q8N474	12	22	30.3	314	35386	Secreted frizzled-related protein 1 OS=Homo sapiens OX=9606 GN=SFRP1 PE=1 SV=1	0.0027	1.0091
sp|P00450|CERU_HUMAN	P00450	16	21	17.7	1065	122205	Ceruloplasmin OS=Homo sapiens OX=9606 GN=CP PE=1 SV=1	0.0008	0.5031
sp|P06396|GELS_HUMAN	P06396	14	21	24	782	85697	Gelsolin OS=Homo sapiens OX=9606 GN=GSN PE=1 SV=1	0.001	0.7378
sp|P07858|CATB_HUMAN	P07858	11	20	28.9	339	37822	Cathepsin B OS=Homo sapiens OX=9606 GN=CTSB PE=1 SV=3	0.0023	0.9454
sp|A0A0B4J1X5|HV374_HUMAN	A0A0B4J1X5	10	19	54.7	117	12840	Immunoglobulin heavy variable 3-74 OS=Homo sapiens OX=9606 GN=IGHV3-74 PE=3 SV=1	0.0062	2.5237
sp|P01034|CYTC_HUMAN	P01034	8	18	48.6	146	15799	Cystatin-C OS=Homo sapiens OX=9606 GN=CST3 PE=1 SV=1	0.0047	2.062
sp|Q86Y46|K2C73_HUMAN	Q86Y46	12	18	11.9	540	58923	Keratin, type II cytoskeletal 73 OS=Homo sapiens OX=9606 GN=KRT73 PE=1 SV=1	0.0013	0.3152
sp|A0A0B4J1V0|HV315_HUMAN	A0A0B4J1V0	8	17	30.3	119	12926	Immunoglobulin heavy variable 3-15 OS=Homo sapiens OX=9606 GN=IGHV3-15 PE=3 SV=1	0.0055	1.0091
sp|A0A0B4J1Y9|HV372_HUMAN	A0A0B4J1Y9	8	17	42	119	13203	Immunoglobulin heavy variable 3-72 OS=Homo sapiens OX=9606 GN=IGHV3-72 PE=3 SV=1	0.0055	1.6303
sp|P20061|TCO1_HUMAN	P20061	11	17	21	433	48207	Transcobalamin-1 OS=Homo sapiens OX=9606 GN=TCN1 PE=1 SV=2	0.0015	0.6218
sp|P02647|APOA1_HUMAN	P02647	12	16	40.1	267	30778	Apolipoprotein A-I OS=Homo sapiens OX=9606 GN=APOA1 PE=1 SV=1	0.0023	1.5177
sp|P05787|K2C8_HUMAN	P05787	10	16	7.2	483	53704	Keratin, type II cytoskeletal 8 OS=Homo sapiens OX=9606 GN=KRT8 PE=1 SV=7	0.0013	0.1803
sp|A0A0C4DH42|HV366_HUMAN;sp|P0DP02|HVC33_HUMAN;sp|P01772|HV333_HUMAN;sp|P01767|HV353_HUMAN	A0A0C4DH42;P0DP02;P01772;P01767	8	15	28.4	116	12698	Immunoglobulin heavy variable 3-66 OS=Homo sapiens OX=9606 GN=IGHV3-66 PE=3 SV=1	0.005	0.9231
sp|P01780|HV307_HUMAN	P01780	9	15	34.2	117	12943	Immunoglobulin heavy variable 3-7 OS=Homo sapiens OX=9606 GN=IGHV3-7 PE=1 SV=2	0.0049	1.1979
sp|P04406|G3P_HUMAN	P04406	6	14	22.1	335	36053	Glyceraldehyde-3-phosphate dehydrogenase OS=Homo sapiens OX=9606 GN=GAPDH PE=1 SV=3	0.0016	0.6634
sp|P0DOX5|IGG1_HUMAN	P0DOX5	11	13	29.4	449	49329	Immunoglobulin gamma-1 heavy chain OS=Homo sapiens OX=9606 PE=1 SV=2	0.0011	0.9679
sp|P80303|NUCB2_HUMAN	P80303	8	13	15	420	50223	Nucleobindin-2 OS=Homo sapiens OX=9606 GN=NUCB2 PE=1 SV=3	0.0012	0.4125
sp|Q96DA0|ZG16B_HUMAN	Q96DA0	8	13	27.4	208	22739	Zymogen granule protein 16 homolog B OS=Homo sapiens OX=9606 GN=ZG16B PE=1 SV=3	0.0024	0.8793
sp|P01009|A1AT_HUMAN	P01009	9	12	13.6	418	46737	Alpha-1-antitrypsin OS=Homo sapiens OX=9606 GN=SERPINA1 PE=1 SV=3	0.0011	0.3677
sp|P01764|HV323_HUMAN;sp|P0DP03|HVC05_HUMAN;sp|P01768|HV330_HUMAN	P01764;P0DP03;P01768	7	12	28.2	117	12582	Immunoglobulin heavy variable 3-23 OS=Homo sapiens OX=9606 GN=IGHV3-23 PE=1 SV=2	0.0039	0.9143
sp|P06702|S10A9_HUMAN	P06702	9	12	42.1	114	13242	Protein S100-A9 OS=Homo sapiens OX=9606 GN=S100A9 PE=1 SV=1	0.004	1.6363
sp|Q14CN4|K2C72_HUMAN	Q14CN4	6	12	7	511	55877	Keratin, type II cytoskeletal 72 OS=Homo sapiens OX=9606 GN=KRT72 PE=1 SV=2	0.0009	0.1749
sp|P01011|AACT_HUMAN	P01011	7	11	14.9	423	47651	Alpha-1-antichymotrypsin OS=Homo sapiens OX=9606 GN=SERPINA3 PE=1 SV=2	0.001	0.4093
sp|P07339|CATD_HUMAN	P07339	6	11	18.4	412	44552	Cathepsin D OS=Homo sapiens OX=9606 GN=CTSD PE=1 SV=1	0.001	0.5276
sp|P55058|PLTP_HUMAN	P55058	8	11	15.8	493	54739	Phospholipid transfer protein OS=Homo sapiens OX=9606 GN=PLTP PE=1 SV=1	0.0009	0.4388
sp|P04083|ANXA1_HUMAN	P04083	6	10	20.5	346	38714	Annexin A1 OS=Homo sapiens OX=9606 GN=ANXA1 PE=1 SV=2	0.0011	0.6032
sp|P07355|ANXA2_HUMAN	P07355	7	10	26.5	339	38604	Annexin A2 OS=Homo sapiens OX=9606 GN=ANXA2 PE=1 SV=2	0.0011	0.8408
sp|P01782|HV309_HUMAN	P01782	7	9	44.1	118	12945	Immunoglobulin heavy variable 3-9 OS=Homo sapiens OX=9606 GN=IGHV3-9 PE=1 SV=2	0.0029	1.7606
sp|P06733|ENOA_HUMAN	P06733	7	9	12.9	434	47169	Alpha-enolase OS=Homo sapiens OX=9606 GN=ENO1 PE=1 SV=2	0.0008	0.3459
sp|P07602|SAP_HUMAN	P07602	7	9	15.1	524	58113	Prosaposin OS=Homo sapiens OX=9606 GN=PSAP PE=1 SV=2	0.0007	0.4158
sp|Q14697|GANAB_HUMAN	Q14697	6	9	6.8	944	106874	Neutral alpha-glucosidase AB OS=Homo sapiens OX=9606 GN=GANAB PE=1 SV=3	0.0004	0.1695
sp|Q5T749|KPRP_HUMAN	Q5T749	6	9	8.6	579	64136	Keratinocyte proline-rich protein OS=Homo sapiens OX=9606 GN=KPRP PE=1 SV=1	0.0006	0.219
sp|Q6MZM9|PRR27_HUMAN	Q6MZM9	3	9	24.2	219	22720	Proline-rich protein 27 OS=Homo sapiens OX=9606 GN=PRR27 PE=2 SV=1	0.0016	0.7458
sp|Q7Z3Y8|K1C27_HUMAN	Q7Z3Y8	5	9	8.1	459	49822	Keratin, type I cytoskeletal 27 OS=Homo sapiens OX=9606 GN=KRT27 PE=1 SV=2	0.0008	0.205
sp|A0A087WSY6|KVD15_HUMAN	A0A087WSY6	3	8	32.2	115	12534	Immunoglobulin kappa variable 3D-15 OS=Homo sapiens OX=9606 GN=IGKV3D-15 PE=3 SV=6	0.0027	1.0989
sp|P01624|KV315_HUMAN	P01624	3	8	32.2	115	12496	Immunoglobulin kappa variable 3-15 OS=Homo sapiens OX=9606 GN=IGKV3-15 PE=1 SV=2	0.0027	1.0989
sp|P05109|S10A8_HUMAN	P05109	6	8	46.2	93	10834	Protein S100-A8 OS=Homo sapiens OX=9606 GN=S100A8 PE=1 SV=1	0.0033	1.8973
sp|P26447|S10A4_HUMAN	P26447	5	8	28.7	101	11728	Protein S100-A4 OS=Homo sapiens OX=9606 GN=S100A4 PE=1 SV=1	0.003	0.9364
sp|P49788|TIG1_HUMAN	P49788	6	8	12.6	294	33285	Retinoic acid receptor responder protein 1 OS=Homo sapiens OX=9606 GN=RARRES1 PE=1 SV=2	0.001	0.3366
sp|P59665|DEF1_HUMAN;sp|P59666|DEF3_HUMAN	P59665;P59666	4	8	20.2	94	10201	Neutrophil defensin 1 OS=Homo sapiens OX=9606 GN=DEFA1 PE=1 SV=1	0.0033	0.5922
sp|P98088|MUC5A_HUMAN	P98088	5	8	2.5	5654	585574	Mucin-5AC OS=Homo sapiens OX=9606 GN=MUC5AC PE=1 SV=4	0.0001	0.0593
sp|Q14515|SPRL1_HUMAN	Q14515	7	8	12.5	664	75208	SPARC-like protein 1 OS=Homo sapiens OX=9606 GN=SPARCL1 PE=1 SV=2	0.0005	0.3335
sp|Q6UXB2|CXL17_HUMAN	Q6UXB2	5	8	39.5	119	13819	C-X-C motif chemokine 17 OS=Homo sapiens OX=9606 GN=CXCL17 PE=1 SV=1	0.0026	1.4831
sp|A0A0A0MS15|HV349_HUMAN	A0A0A0MS15	4	7	21	119	13056	Immunoglobulin heavy variable 3-49 OS=Homo sapiens OX=9606 GN=IGHV3-49 PE=3 SV=1	0.0023	0.6218
sp|A0A0C4DH72|KV106_HUMAN	A0A0C4DH72	4	7	31.6	117	12697	Immunoglobulin kappa variable 1-6 OS=Homo sapiens OX=9606 GN=IGKV1-6 PE=3 SV=1	0.0023	1.0701
sp|P04792|HSPB1_HUMAN	P04792	5	7	37.1	205	22783	Heat shock protein beta-1 OS=Homo sapiens OX=9606 GN=HSPB1 PE=1 SV=2	0.0013	1.3496
sp|P06312|KV401_HUMAN	P06312	4	7	29.8	121	13380	Immunoglobulin kappa variable 4-1 OS=Homo sapiens OX=9606 GN=IGKV4-1 PE=1 SV=1	0.0022	0.9861
sp|P0DP04|HV43D_HUMAN	P0DP04	6	7	44.1	118	13017	Immunoglobulin heavy variable 3-43D OS=Homo sapiens OX=9606 GN=IGHV3-43D PE=3 SV=1	0.0023	1.7606
sp|P13987|CD59_HUMAN	P13987	5	7	25.8	128	14177	CD59 glycoprotein OS=Homo sapiens OX=9606 GN=CD59 PE=1 SV=1	0.0021	0.8113
sp|P34096|RNAS4_HUMAN	P34096	5	7	29.3	147	16840	Ribonuclease 4 OS=Homo sapiens OX=9606 GN=RNASE4 PE=1 SV=3	0.0018	0.9634
sp|P35900|K1C20_HUMAN	P35900	5	7	4.5	424	48487	Keratin, type I cytoskeletal 20 OS=Homo sapiens OX=9606 GN=KRT20 PE=1 SV=1	0.0006	0.1092
sp|Q96S96|PEBP4_HUMAN	Q96S96	4	7	29.1	227	25733	Phosphatidylethanolamine-binding protein 4 OS=Homo sapiens OX=9606 GN=PEBP4 PE=1 SV=3	0.0012	0.9543
sp|P00751|CFAB_HUMAN	P00751	5	6	7.2	764	85533	Complement factor B OS=Homo sapiens OX=9606 GN=CFB PE=1 SV=2	0.0003	0.1803
sp|P01033|TIMP1_HUMAN	P01033	4	6	24.6	207	23171	Metalloproteinase inhibitor 1 OS=Homo sapiens OX=9606 GN=TIMP1 PE=1 SV=1	0.0011	0.762
sp|P02763|A1AG1_HUMAN	P02763	4	6	12.4	201	23540	Alpha-1-acid glycoprotein 1 OS=Homo sapiens OX=9606 GN=ORM1 PE=1 SV=2	0.0011	0.3305
sp|P81605|DCD_HUMAN	P81605	5	6	36.4	110	11284	Dermcidin OS=Homo sapiens OX=9606 GN=DCD PE=1 SV=2	0.0021	1.3121
sp|Q15782|CH3L2_HUMAN	Q15782	5	6	15.1	390	43501	Chitinase-3-like protein 2 OS=Homo sapiens OX=9606 GN=CHI3L2 PE=1 SV=1	0.0006	0.4158
sp|A0A075B6P5|KV228_HUMAN;sp|P01615|KVD28_HUMAN;sp|P01614|KVD40_HUMAN;sp|A0A087WW87|KV240_HUMAN	A0A075B6P5;P01615;P01614;A0A087WW87	3	5	16.7	120	12957	Immunoglobulin kappa variable 2-28 OS=Homo sapiens OX=9606 GN=IGKV2-28 PE=3 SV=1	0.0016	0.4689
sp|A0A075B6R2|HV404_HUMAN;sp|P0DP08|HVD82_HUMAN;sp|P0DP07|HV431_HUMAN;sp|P0DP06|HVD34_HUMAN;sp|P06331|HV434_HUMAN;sp|P01825|HV459_HUMAN;sp|P01824|HV439_HUMAN;sp|A0A0C4DH41|HV461_HUMAN;sp|A0A087WSY4|HV432_HUMAN	A0A075B6R2;P0DP08;P0DP07;P0DP06;P06331;P01825;P01824;A0A0C4DH41;A0A087WSY4	3	5	18.8	117	12848	Immunoglobulin heavy variable 4-4 OS=Homo sapiens OX=9606 GN=IGHV4-4 PE=3 SV=2	0.0016	0.5417
sp|A0A075B6R9|KVD24_HUMAN;sp|A0A0C4DH68|KV224_HUMAN	A0A075B6R9;A0A0C4DH68	3	5	16.7	120	13079	Probable non-functional immunoglobulin kappa variable 2D-24 OS=Homo sapiens OX=9606 GN=IGKV2D-24 PE=1 SV=1	0.0016	0.4689
sp|A0A0C4DH31|HV118_HUMAN	A0A0C4DH31	4	5	12	117	12820	Immunoglobulin heavy variable 1-18 OS=Homo sapiens OX=9606 GN=IGHV1-18 PE=3 SV=1	0.0016	0.3183
sp|A0A0C4DH36|HV338_HUMAN	A0A0C4DH36	4	5	19	116	12759	Probable non-functional immunoglobulin heavy variable 3-38 OS=Homo sapiens OX=9606 GN=IGHV3-38 PE=1 SV=1	0.0017	0.5488
sp|P01619|KV320_HUMAN	P01619	3	5	27.6	116	12557	Immunoglobulin kappa variable 3-20 OS=Homo sapiens OX=9606 GN=IGKV3-20 PE=1 SV=2	0.0017	0.888
sp|P01766|HV313_HUMAN	P01766	4	5	25	116	12506	Immunoglobulin heavy variable 3-13 OS=Homo sapiens OX=9606 GN=IGHV3-13 PE=1 SV=2	0.0017	0.7783
sp|P02790|HEMO_HUMAN	P02790	2	5	4.1	462	51676	Hemopexin OS=Homo sapiens OX=9606 GN=HPX PE=1 SV=2	0.0004	0.099
sp|P30740|ILEU_HUMAN	P30740	5	5	18.2	379	42742	Leukocyte elastase inhibitor OS=Homo sapiens OX=9606 GN=SERPINB1 PE=1 SV=1	0.0005	0.5205
sp|P31949|S10AB_HUMAN	P31949	3	5	36.2	105	11740	Protein S100-A11 OS=Homo sapiens OX=9606 GN=S100A11 PE=1 SV=2	0.0018	1.3014
sp|P60174|TPIS_HUMAN	P60174	3	5	12.9	249	26669	Triosephosphate isomerase OS=Homo sapiens OX=9606 GN=TPI1 PE=1 SV=4	0.0008	0.3459
sp|P62805|H4_HUMAN	P62805	4	5	32	103	11367	Histone H4 OS=Homo sapiens OX=9606 GN=H4C1 PE=1 SV=2	0.0019	1.0893
sp|Q8N7U6|EFHB_HUMAN	Q8N7U6	1	5	1.3	833	93802	EF-hand domain-containing family member B OS=Homo sapiens OX=9606 GN=EFHB PE=1 SV=4	0.0002	0.0304
sp|A0A075B6K4|LV310_HUMAN	A0A075B6K4	2	4	16.5	115	12441	Immunoglobulin lambda variable 3-10 OS=Homo sapiens OX=9606 GN=IGLV3-10 PE=3 SV=2	0.0013	0.4622
sp|A0A075B6S2|KVD29_HUMAN;sp|A2NJV5|KV229_HUMAN;sp|A0A0A0MRZ7|KVD26_HUMAN	A0A075B6S2;A2NJV5;A0A0A0MRZ7	2	4	16.7	120	13143	Immunoglobulin kappa variable 2D-29 OS=Homo sapiens OX=9606 GN=IGKV2D-29 PE=3 SV=1	0.0013	0.4689
sp|A0A0C4DH25|KVD20_HUMAN	A0A0C4DH25	3	4	27.6	116	12515	Immunoglobulin kappa variable 3D-20 OS=Homo sapiens OX=9606 GN=IGKV3D-20 PE=3 SV=1	0.0013	0.888
sp|O00584|RNT2_HUMAN	O00584	3	4	15.2	256	29481	Ribonuclease T2 OS=Homo sapiens OX=9606 GN=RNASET2 PE=1 SV=2	0.0006	0.4191
sp|O43653|PSCA_HUMAN	O43653	1	4	8.8	114	11959	Prostate stem cell antigen OS=Homo sapiens OX=9606 GN=PSCA PE=1 SV=2	0.0013	0.2246
sp|P01602|KV105_HUMAN	P01602	3	4	32.5	117	12782	Immunoglobulin kappa variable 1-5 OS=Homo sapiens OX=9606 GN=IGKV1-5 PE=1 SV=2	0.0013	1.1135
sp|P02774|VTDB_HUMAN	P02774	3	4	8	474	52918	Vitamin D-binding protein OS=Homo sapiens OX=9606 GN=GC PE=1 SV=2	0.0003	0.2023
sp|P05090|APOD_HUMAN	P05090	2	4	6.3	189	21276	Apolipoprotein D OS=Homo sapiens OX=9606 GN=APOD PE=1 SV=1	0.0008	0.1561
sp|P0DTE7|AMY1B_HUMAN;sp|P0DUB6|AMY1A_HUMAN;sp|P0DTE8|AMY1C_HUMAN	P0DTE7;P0DUB6;P0DTE8	4	4	9.6	511	57768	Alpha-amylase 1B OS=Homo sapiens OX=9606 GN=AMY1B PE=1 SV=1	0.0003	0.2474
sp|P10599|THIO_HUMAN	P10599	2	4	20	105	11737	Thioredoxin OS=Homo sapiens OX=9606 GN=TXN PE=1 SV=3	0.0015	0.5849
sp|P28799|GRN_HUMAN	P28799	2	4	5.2	593	63545	Progranulin OS=Homo sapiens OX=9606 GN=GRN PE=1 SV=2	0.0003	0.1272
sp|Q02818|NUCB1_HUMAN	Q02818	4	4	10.4	461	53879	Nucleobindin-1 OS=Homo sapiens OX=9606 GN=NUCB1 PE=1 SV=4	0.0003	0.2706
sp|Q13217|DNJC3_HUMAN	Q13217	3	4	8.7	504	57580	DnaJ homolog subfamily C member 3 OS=Homo sapiens OX=9606 GN=DNAJC3 PE=1 SV=1	0.0003	0.2218
sp|Q5D862|FILA2_HUMAN	Q5D862	2	4	1	2391	248072	Filaggrin-2 OS=Homo sapiens OX=9606 GN=FLG2 PE=1 SV=1	0.0001	0.0233
sp|Q8N1N4|K2C78_HUMAN	Q8N1N4	4	4	5.8	520	56866	Keratin, type II cytoskeletal 78 OS=Homo sapiens OX=9606 GN=KRT78 PE=1 SV=2	0.0003	0.1429
sp|Q92743|HTRA1_HUMAN	Q92743	3	4	7.1	480	51287	Serine protease HTRA1 OS=Homo sapiens OX=9606 GN=HTRA1 PE=1 SV=1	0.0003	0.1776
sp|A0A075B6S5|KV127_HUMAN;sp|A0A0C4DH69|KV109_HUMAN;sp|A0A0C4DH67|KV108_HUMAN	A0A075B6S5;A0A0C4DH69;A0A0C4DH67	2	3	18.8	117	12711	Immunoglobulin kappa variable 1-27 OS=Homo sapiens OX=9606 GN=IGKV1-27 PE=3 SV=1	0.001	0.5417
sp|A0A0B4J2H0|HV69D_HUMAN;sp|P0DP01|HV108_HUMAN;sp|P01743|HV146_HUMAN;sp|P01742|HV169_HUMAN;sp|A0A0C4DH29|HV103_HUMAN	A0A0B4J2H0;P0DP01;P01743;P01742;A0A0C4DH29	2	3	12	117	12660	Immunoglobulin heavy variable 1-69D OS=Homo sapiens OX=9606 GN=IGHV1-69D PE=1 SV=1	0.001	0.3183
sp|P01700|LV147_HUMAN	P01700	3	3	29.1	117	12284	Immunoglobulin lambda variable 1-47 OS=Homo sapiens OX=9606 GN=IGLV1-47 PE=1 SV=2	0.001	0.9543
sp|P02749|APOH_HUMAN	P02749	1	3	2.6	345	38298	Beta-2-glycoprotein 1 OS=Homo sapiens OX=9606 GN=APOH PE=1 SV=3	0.0003	0.0617
sp|P03950|ANGI_HUMAN	P03950	3	3	23.8	147	16550	Angiogenin OS=Homo sapiens OX=9606 GN=ANG PE=1 SV=1	0.0008	0.7298
sp|P06310|KV230_HUMAN	P06310	2	3	16.7	120	13185	Immunoglobulin kappa variable 2-30 OS=Homo sapiens OX=9606 GN=IGKV2-30 PE=3 SV=2	0.001	0.4689
sp|P07738|PMGE_HUMAN	P07738	2	3	5.4	259	30005	Bisphosphoglycerate mutase OS=Homo sapiens OX=9606 GN=BPGM PE=1 SV=2	0.0004	0.1324
sp|P09211|GSTP1_HUMAN	P09211	3	3	21.9	210	23356	Glutathione S-transferase P OS=Homo sapiens OX=9606 GN=GSTP1 PE=1 SV=2	0.0005	0.6558
sp|P14314|GLU2B_HUMAN	P14314	2	3	4	528	59425	Glucosidase 2 subunit beta OS=Homo sapiens OX=9606 GN=PRKCSH PE=1 SV=2	0.0002	0.0965
sp|P22352|GPX3_HUMAN	P22352	1	3	5.3	226	25402	Glutathione peroxidase 3 OS=Homo sapiens OX=9606 GN=GPX3 PE=1 SV=2	0.0005	0.1298
sp|P31944|CASPE_HUMAN	P31944	3	3	16.5	242	27680	Caspase-14 OS=Homo sapiens OX=9606 GN=CASP14 PE=1 SV=2	0.0005	0.4622
sp|P68104|EF1A1_HUMAN;sp|Q5VTE0|EF1A3_HUMAN;sp|Q05639|EF1A2_HUMAN	P68104;Q5VTE0;Q05639	2	3	4.5	462	50141	Elongation factor 1-alpha 1 OS=Homo sapiens OX=9606 GN=EEF1A1 PE=1 SV=1	0.0002	0.1092
sp|Q13296|SG2A2_HUMAN	Q13296	2	3	12.9	93	10499	Mammaglobin-A OS=Homo sapiens OX=9606 GN=SCGB2A2 PE=1 SV=1	0.0012	0.3459
sp|Q96T17|MA7D2_HUMAN	Q96T17	1	3	1.2	732	81965	MAP7 domain-containing protein 2 OS=Homo sapiens OX=9606 GN=MAP7D2 PE=1 SV=2	0.0002	0.028
sp|A0A075B6K5|LV39_HUMAN;sp|P80748|LV321_HUMAN	A0A075B6K5;P80748	1	2	13.9	115	12332	Immunoglobulin lambda variable 3-9 OS=Homo sapiens OX=9606 GN=IGLV3-9 PE=3 SV=1	0.0007	0.3772
sp|A0A0A0MT36|KVD21_HUMAN	A0A0A0MT36	2	2	15.8	114	12340	Immunoglobulin kappa variable 6D-21 OS=Homo sapiens OX=9606 GN=IGKV6D-21 PE=3 SV=1	0.0007	0.4388
sp|A0A0C4DH24|KV621_HUMAN	A0A0C4DH24	2	2	15.8	114	12430	Immunoglobulin kappa variable 6-21 OS=Homo sapiens OX=9606 GN=IGKV6-21 PE=3 SV=1	0.0007	0.4388
sp|A0A0C4DH38|HV551_HUMAN;sp|A0A0J9YXX1|HV5X1_HUMAN	A0A0C4DH38;A0A0J9YXX1	1	2	9.4	117	12675	Immunoglobulin heavy variable 5-51 OS=Homo sapiens OX=9606 GN=IGHV5-51 PE=3 SV=1	0.0007	0.2417
sp|P01023|A2MG_HUMAN	P01023	1	2	0.8	1474	163290	Alpha-2-macroglobulin OS=Homo sapiens OX=9606 GN=A2M PE=1 SV=3	0.0001	0.0186
sp|P01593|KVD33_HUMAN;sp|P01594|KV133_HUMAN	P01593;P01594	1	2	13.7	117	12848	Immunoglobulin kappa variable 1D-33 OS=Homo sapiens OX=9606 GN=IGKV1D-33 PE=1 SV=2	0.0007	0.3709
sp|P02652|APOA2_HUMAN	P02652	2	2	21	100	11175	Apolipoprotein A-II OS=Homo sapiens OX=9606 GN=APOA2 PE=1 SV=1	0.0008	0.6218
sp|P12830|CADH1_HUMAN	P12830	1	2	1	882	97456	Cadherin-1 OS=Homo sapiens OX=9606 GN=CDH1 PE=1 SV=3	0.0001	0.0233
sp|P14923|PLAK_HUMAN	P14923	2	2	3	745	81745	Junction plakoglobin OS=Homo sapiens OX=9606 GN=JUP PE=1 SV=3	0.0001	0.0715
sp|P31749|AKT1_HUMAN;sp|Q9Y243|AKT3_HUMAN;sp|P31751|AKT2_HUMAN	P31749;Q9Y243;P31751	1	2	3.3	480	55686	RAC-alpha serine/threonine-protein kinase OS=Homo sapiens OX=9606 GN=AKT1 PE=1 SV=2	0.0002	0.0789
sp|P63104|1433Z_HUMAN	P63104	1	2	5.7	245	27745	14-3-3 protein zeta/delta OS=Homo sapiens OX=9606 GN=YWHAZ PE=1 SV=1	0.0003	0.1402
sp|Q01469|FABP5_HUMAN	Q01469	1	2	10.4	135	15164	Fatty acid-binding protein 5 OS=Homo sapiens OX=9606 GN=FABP5 PE=1 SV=3	0.0006	0.2706
sp|Q08554|DSC1_HUMAN	Q08554	1	2	1.9	894	99987	Desmocollin-1 OS=Homo sapiens OX=9606 GN=DSC1 PE=1 SV=2	0.0001	0.0447
sp|Q16651|PRSS8_HUMAN	Q16651	1	2	4.1	343	36431	Prostasin OS=Homo sapiens OX=9606 GN=PRSS8 PE=1 SV=1	0.0002	0.099
sp|Q6PRD1|GP179_HUMAN	Q6PRD1	1	2	0.5	2367	257360	Probable G-protein coupled receptor 179 OS=Homo sapiens OX=9606 GN=GPR179 PE=1 SV=2	0	0.0116
sp|Q86YZ3|HORN_HUMAN	Q86YZ3	2	2	4.4	2850	282389	Hornerin OS=Homo sapiens OX=9606 GN=HRNR PE=1 SV=2	0	0.1066
sp|Q8WXG9|AGRV1_HUMAN	Q8WXG9	1	2	0.1	6306	693082	Adhesion G-protein coupled receptor V1 OS=Homo sapiens OX=9606 GN=ADGRV1 PE=1 SV=2	0	0.0023
sp|Q9P127|LUZP4_HUMAN	Q9P127	1	2	3.2	313	35937	Leucine zipper protein 4 OS=Homo sapiens OX=9606 GN=LUZP4 PE=1 SV=1	0.0002	0.0765
sp|A0A0C4DH35|HV335_HUMAN	A0A0C4DH35	1	1	9.4	117	12810	Probable non-functional immunoglobulin heavy variable 3-35 OS=Homo sapiens OX=9606 GN=IGHV3-35 PE=1 SV=1	0.0003	0.2417
sp|O60814|H2B1K_HUMAN;sp|Q99880|H2B1L_HUMAN;sp|Q99879|H2B1M_HUMAN;sp|Q99877|H2B1N_HUMAN;sp|Q93079|H2B1H_HUMAN;sp|Q8N257|H2B3B_HUMAN;sp|Q5QNW6|H2B2F_HUMAN;sp|Q16778|H2B2E_HUMAN;sp|P62807|H2B1C_HUMAN;sp|P58876|H2B1D_HUMAN;sp|P57053|H2BFS_HUMAN;sp|P33778|H2B1B_HUMAN;sp|P23527|H2B1O_HUMAN;sp|P06899|H2B1J_HUMAN	O60814;Q99880;Q99879;Q99877;Q93079;Q8N257;Q5QNW6;Q16778;P62807;P58876;P57053;P33778;P23527;P06899	1	1	11.9	126	13890	Histone H2B type 1-K OS=Homo sapiens OX=9606 GN=H2BC12 PE=1 SV=3	0.0003	0.3152
sp|O75688|PPM1B_HUMAN	O75688	1	1	3.8	479	52643	Protein phosphatase 1B OS=Homo sapiens OX=9606 GN=PPM1B PE=1 SV=1	0.0001	0.0914
sp|P00338|LDHA_HUMAN;sp|Q6ZMR3|LDH6A_HUMAN;sp|P07864|LDHC_HUMAN;sp|P07195|LDHB_HUMAN	P00338;Q6ZMR3;P07864;P07195	1	1	3.6	332	36689	L-lactate dehydrogenase A chain OS=Homo sapiens OX=9606 GN=LDHA PE=1 SV=2	0.0001	0.0864
sp|P04908|H2A1B_HUMAN;sp|Q9BTM1|H2AJ_HUMAN;sp|Q99878|H2A1J_HUMAN;sp|Q96QV6|H2A1A_HUMAN;sp|Q96KK5|H2A1H_HUMAN;sp|Q93077|H2A1C_HUMAN;sp|Q8IUE6|H2A2B_HUMAN;sp|Q7L7L0|H2A3_HUMAN;sp|Q71UI9|H2AV_HUMAN;sp|Q6FI13|H2A2A_HUMAN;sp|Q16777|H2A2C_HUMAN;sp|P20671|H2A1D_HUMAN;sp|P16104|H2AX_HUMAN;sp|P0C0S8|H2A1_HUMAN;sp|P0C0S5|H2AZ_HUMAN	P04908;Q9BTM1;Q99878;Q96QV6;Q96KK5;Q93077;Q8IUE6;Q7L7L0;Q71UI9;Q6FI13;Q16777;P20671;P16104;P0C0S8;P0C0S5	1	1	6.9	130	14135	Histone H2A type 1-B/E OS=Homo sapiens OX=9606 GN=H2AC4 PE=1 SV=2	0.0003	0.1722
sp|P07711|CATL1_HUMAN	P07711	1	1	3.6	333	37564	Procathepsin L OS=Homo sapiens OX=9606 GN=CTSL PE=1 SV=2	0.0001	0.0864
sp|P08571|CD14_HUMAN	P08571	1	1	4.8	375	40076	Monocyte differentiation antigen CD14 OS=Homo sapiens OX=9606 GN=CD14 PE=1 SV=2	0.0001	0.1169
sp|P0DJI8|SAA1_HUMAN;sp|P0DJI9|SAA2_HUMAN	P0DJI8;P0DJI9	1	1	11.5	122	13532	Serum amyloid A-1 protein OS=Homo sapiens OX=9606 GN=SAA1 PE=1 SV=1	0.0003	0.3032
sp|P13928|ANXA8_HUMAN;sp|Q5VT79|AXA81_HUMAN	P13928;Q5VT79	1	1	2.4	327	36881	Annexin A8 OS=Homo sapiens OX=9606 GN=ANXA8 PE=1 SV=3	0.0001	0.0568
sp|P31947|1433S_HUMAN	P31947	1	1	4.8	248	27774	14-3-3 protein sigma OS=Homo sapiens OX=9606 GN=SFN PE=1 SV=1	0.0002	0.1169
sp|P68431|H31_HUMAN;sp|Q71DI3|H32_HUMAN;sp|Q16695|H31T_HUMAN;sp|P84243|H33_HUMAN	P68431;Q71DI3;Q16695;P84243	1	1	8.1	136	15404	Histone H3.1 OS=Homo sapiens OX=9606 GN=H3C1 PE=1 SV=2	0.0003	0.205
sp|Q14508|WFDC2_HUMAN	Q14508	1	1	11.3	124	12993	WAP four-disulfide core domain protein 2 OS=Homo sapiens OX=9606 GN=WFDC2 PE=1 SV=2	0.0003	0.2972
sp|Q6NUJ1|SAPL1_HUMAN	Q6NUJ1	1	1	2.1	521	56627	Proactivator polypeptide-like 1 OS=Homo sapiens OX=9606 GN=PSAPL1 PE=2 SV=2	0.0001	0.0495
sp|Q6UXB3|LYPD2_HUMAN	Q6UXB3	1	1	11.2	125	13115	Ly6/PLAUR domain-containing protein 2 OS=Homo sapiens OX=9606 GN=LYPD2 PE=1 SV=1	0.0003	0.2942
sp|Q96BQ1|FAM3D_HUMAN	Q96BQ1	1	1	8	224	24963	Protein FAM3D OS=Homo sapiens OX=9606 GN=FAM3D PE=1 SV=1	0.0002	0.2023
sp|Q9UBC9|SPRR3_HUMAN	Q9UBC9	1	1	8.9	169	18154	Small proline-rich protein 3 OS=Homo sapiens OX=9606 GN=SPRR3 PE=1 SV=2	0.0002	0.2274
sp|Q9UBG3|CRNN_HUMAN	Q9UBG3	1	1	3.2	495	53533	Cornulin OS=Homo sapiens OX=9606 GN=CRNN PE=1 SV=1	0.0001	0.0765

## Sheet: 10) 200ng-88min#1(402)
Protein Group Name	Protein Accession	Number Stripped Peptides	Number PSMs	Protein Coverage	Protein Length	Protein Molecular Weight	Protein Description	NSAF Score	EmPAI Score
sp|P02788|TRFL_HUMAN	P02788	219	1870	90	710	78182	Lactotransferrin OS=Homo sapiens OX=9606 GN=LTF PE=1 SV=6	0.0455	6.9433
sp|P61626|LYSC_HUMAN	P61626	63	725	87.2	148	16537	Lysozyme C OS=Homo sapiens OX=9606 GN=LYZ PE=1 SV=1	0.0847	6.4473
sp|P31025|LCN1_HUMAN	P31025	64	522	78.4	176	19250	Lipocalin-1 OS=Homo sapiens OX=9606 GN=LCN1 PE=1 SV=1	0.0513	5.0814
sp|P01833|PIGR_HUMAN	P01833	100	461	64.9	764	83284	Polymeric immunoglobulin receptor OS=Homo sapiens OX=9606 GN=PIGR PE=1 SV=4	0.0104	3.4566
sp|P01876|IGHA1_HUMAN	P01876	48	436	79.6	398	42849	Immunoglobulin heavy constant alpha 1 OS=Homo sapiens OX=9606 GN=IGHA1 PE=1 SV=3	0.0189	5.2517
sp|P02768|ALBU_HUMAN	P02768	128	371	90.8	609	69367	Albumin OS=Homo sapiens OX=9606 GN=ALB PE=1 SV=2	0.0105	7.091
sp|P04264|K2C1_HUMAN	P04264	96	356	65.5	644	66039	Keratin, type II cytoskeletal 1 OS=Homo sapiens OX=9606 GN=KRT1 PE=1 SV=6	0.0096	3.5186
sp|P12273|PIP_HUMAN	P12273	29	329	77.4	146	16572	Prolactin-inducible protein OS=Homo sapiens OX=9606 GN=PIP PE=1 SV=1	0.039	4.9429
sp|P01024|CO3_HUMAN	P01024	127	296	58.1	1663	187147	Complement C3 OS=Homo sapiens OX=9606 GN=C3 PE=1 SV=2	0.0031	2.8107
sp|P98160|PGBM_HUMAN	P98160	142	262	34.2	4391	468835	Basement membrane-specific heparan sulfate proteoglycan core protein OS=Homo sapiens OX=9606 GN=HSPG2 PE=1 SV=4	0.001	1.1979
sp|P25311|ZA2G_HUMAN	P25311	53	259	65.8	298	34259	Zinc-alpha-2-glycoprotein OS=Homo sapiens OX=9606 GN=AZGP1 PE=1 SV=2	0.015	3.5499
sp|P0DOX2|IGA2_HUMAN	P0DOX2	26	242	48.6	455	48934	Immunoglobulin alpha-2 heavy chain OS=Homo sapiens OX=9606 PE=1 SV=2	0.0092	2.062
sp|Q9UGM3|DMBT1_HUMAN	Q9UGM3	56	238	40.5	2413	260734	Deleted in malignant brain tumors 1 protein OS=Homo sapiens OX=9606 GN=DMBT1 PE=1 SV=2	0.0017	1.541
sp|P01834|IGKC_HUMAN	P01834	22	226	100	107	11765	Immunoglobulin kappa constant OS=Homo sapiens OX=9606 GN=IGKC PE=1 SV=2	0.0365	9
sp|Q9GZZ8|LACRT_HUMAN	Q9GZZ8	29	222	43.5	138	14246	Extracellular glycoprotein lacritin OS=Homo sapiens OX=9606 GN=LACRT PE=1 SV=1	0.0278	1.7227
sp|P35527|K1C9_HUMAN	P35527	62	220	77	623	62064	Keratin, type I cytoskeletal 9 OS=Homo sapiens OX=9606 GN=KRT9 PE=1 SV=3	0.0061	4.8884
sp|O75556|SG2A1_HUMAN	O75556	39	217	75.8	95	10884	Mammaglobin-B OS=Homo sapiens OX=9606 GN=SCGB2A1 PE=1 SV=1	0.0395	4.728
sp|P01877|IGHA2_HUMAN	P01877	21	213	42.7	391	42334	Immunoglobulin heavy constant alpha 2 OS=Homo sapiens OX=9606 GN=IGHA2 PE=1 SV=5	0.0094	1.673
sp|P01036|CYTS_HUMAN	P01036	28	207	76.6	141	16214	Cystatin-S OS=Homo sapiens OX=9606 GN=CST4 PE=1 SV=3	0.0254	4.8345
sp|P13645|K1C10_HUMAN	P13645	60	205	60.8	584	58827	Keratin, type I cytoskeletal 10 OS=Homo sapiens OX=9606 GN=KRT10 PE=1 SV=6	0.0061	3.0551
sp|P0DOY3|IGLC3_HUMAN	P0DOY3	22	188	93.4	106	11266	Immunoglobulin lambda constant 3 OS=Homo sapiens OX=9606 GN=IGLC3 PE=1 SV=1	0.0307	7.5901
sp|P0DOX7|IGK_HUMAN	P0DOX7	21	181	66.4	214	23379	Immunoglobulin kappa light chain OS=Homo sapiens OX=9606 PE=1 SV=1	0.0146	3.6132
sp|Q16378|PROL4_HUMAN	Q16378	15	162	39.6	134	15097	Proline-rich protein 4 OS=Homo sapiens OX=9606 GN=PRR4 PE=1 SV=3	0.0209	1.4889
sp|P35908|K22E_HUMAN	P35908	67	160	66.4	639	65433	Keratin, type II cytoskeletal 2 epidermal OS=Homo sapiens OX=9606 GN=KRT2 PE=1 SV=2	0.0043	3.6132
sp|P13647|K2C5_HUMAN	P13647	67	153	56.3	590	62378	Keratin, type II cytoskeletal 5 OS=Homo sapiens OX=9606 GN=KRT5 PE=1 SV=3	0.0045	2.6559
sp|Q99935|PROL1_HUMAN	Q99935	12	146	31.9	248	27216	Opiorphin prepropeptide OS=Homo sapiens OX=9606 GN=OPRPN PE=1 SV=2	0.0102	1.0845
sp|P02538|K2C6A_HUMAN	P02538	63	141	61.7	564	60045	Keratin, type II cytoskeletal 6A OS=Homo sapiens OX=9606 GN=KRT6A PE=1 SV=3	0.0043	3.14
sp|P0DOX8|IGL1_HUMAN	P0DOX8	17	141	55.6	216	22830	Immunoglobulin lambda-1 light chain OS=Homo sapiens OX=9606 PE=1 SV=1	0.0113	2.5975
sp|P48668|K2C6C_HUMAN	P48668	61	132	59.9	564	60025	Keratin, type II cytoskeletal 6C OS=Homo sapiens OX=9606 GN=KRT6C PE=1 SV=3	0.004	2.9719
sp|P13646|K1C13_HUMAN	P13646	47	126	60.7	458	49588	Keratin, type I cytoskeletal 13 OS=Homo sapiens OX=9606 GN=KRT13 PE=1 SV=4	0.0048	3.0458
sp|P01037|CYTN_HUMAN	P01037	20	123	67.4	141	16388	Cystatin-SN OS=Homo sapiens OX=9606 GN=CST1 PE=1 SV=3	0.0151	3.7206
sp|P02533|K1C14_HUMAN	P02533	55	123	69.9	472	51561	Keratin, type I cytoskeletal 14 OS=Homo sapiens OX=9606 GN=KRT14 PE=1 SV=4	0.0045	4.0003
sp|O95968|SG1D1_HUMAN	O95968	25	120	52.2	90	9898	Secretoglobin family 1D member 1 OS=Homo sapiens OX=9606 GN=SCGB1D1 PE=1 SV=1	0.0231	2.3266
sp|P04259|K2C6B_HUMAN	P04259	54	116	56.4	564	60067	Keratin, type II cytoskeletal 6B OS=Homo sapiens OX=9606 GN=KRT6B PE=1 SV=5	0.0036	2.6644
sp|P01591|IGJ_HUMAN	P01591	22	112	69.8	159	18099	Immunoglobulin J chain OS=Homo sapiens OX=9606 GN=JCHAIN PE=1 SV=4	0.0122	3.9888
sp|P01871|IGHM_HUMAN	P01871	34	112	50.4	474	51924	Immunoglobulin heavy constant mu OS=Homo sapiens OX=9606 GN=IGHM PE=1 SV=5	0.0041	2.1915
sp|P22079|PERL_HUMAN	P22079	44	112	50.1	712	80288	Lactoperoxidase OS=Homo sapiens OX=9606 GN=LPO PE=1 SV=2	0.0027	2.1696
sp|P10909|CLUS_HUMAN	P10909	38	104	46.1	449	52495	Clusterin OS=Homo sapiens OX=9606 GN=CLU PE=1 SV=1	0.004	1.8907
sp|Q13421|MSLN_HUMAN	Q13421	34	104	41.3	630	68986	Mesothelin OS=Homo sapiens OX=9606 GN=MSLN PE=1 SV=2	0.0029	1.5882
sp|P08779|K1C16_HUMAN	P08779	39	94	56.2	473	51268	Keratin, type I cytoskeletal 16 OS=Homo sapiens OX=9606 GN=KRT16 PE=1 SV=4	0.0034	2.6475
sp|P02787|TRFE_HUMAN	P02787	51	92	57.2	698	77050	Serotransferrin OS=Homo sapiens OX=9606 GN=TF PE=1 SV=4	0.0023	2.7325
sp|P0DOX6|IGM_HUMAN	P0DOX6	29	88	35.9	576	63486	Immunoglobulin mu heavy chain OS=Homo sapiens OX=9606 PE=1 SV=2	0.0026	1.2856
sp|Q08380|LG3BP_HUMAN	Q08380	31	84	40	585	65331	Galectin-3-binding protein OS=Homo sapiens OX=9606 GN=LGALS3BP PE=1 SV=1	0.0025	1.5119
sp|P14555|PA2GA_HUMAN	P14555	22	78	61.8	144	16083	Phospholipase A2, membrane associated OS=Homo sapiens OX=9606 GN=PLA2G2A PE=1 SV=2	0.0094	3.1495
sp|P08727|K1C19_HUMAN	P08727	37	73	68.5	400	44106	Keratin, type I cytoskeletal 19 OS=Homo sapiens OX=9606 GN=KRT19 PE=1 SV=4	0.0032	3.8417
sp|P19013|K2C4_HUMAN	P19013	41	72	58.3	520	56144	Keratin, type II cytoskeletal 4 OS=Homo sapiens OX=9606 GN=KRT4 PE=1 SV=5	0.0024	2.8282
sp|Q04695|K1C17_HUMAN	Q04695	29	72	41.2	432	48106	Keratin, type I cytoskeletal 17 OS=Homo sapiens OX=9606 GN=KRT17 PE=1 SV=2	0.0029	1.5823
sp|P09228|CYTT_HUMAN	P09228	8	70	31.9	141	16445	Cystatin-SA OS=Homo sapiens OX=9606 GN=CST2 PE=1 SV=1	0.0086	1.0845
sp|P00738|HPT_HUMAN	P00738	30	68	55.7	406	45205	Haptoglobin OS=Homo sapiens OX=9606 GN=HP PE=1 SV=1	0.0029	2.6058
sp|P00450|CERU_HUMAN	P00450	37	66	37.2	1065	122205	Ceruloplasmin OS=Homo sapiens OX=9606 GN=CP PE=1 SV=1	0.0011	1.355
sp|P19012|K1C15_HUMAN	P19012	21	64	23.2	456	49212	Keratin, type I cytoskeletal 15 OS=Homo sapiens OX=9606 GN=KRT15 PE=1 SV=3	0.0024	0.7061
sp|P60709|ACTB_HUMAN;sp|P63261|ACTG_HUMAN	P60709;P63261	32	61	62.7	375	41737	Actin, cytoplasmic 1 OS=Homo sapiens OX=9606 GN=ACTB PE=1 SV=1	0.0028	3.2364
sp|O95678|K2C75_HUMAN	O95678	28	60	18.9	551	59560	Keratin, type II cytoskeletal 75 OS=Homo sapiens OX=9606 GN=KRT75 PE=1 SV=2	0.0019	0.5453
sp|P80188|NGAL_HUMAN	P80188	25	60	75.3	198	22588	Neutrophil gelatinase-associated lipocalin OS=Homo sapiens OX=9606 GN=LCN2 PE=1 SV=2	0.0052	4.6624
sp|P06396|GELS_HUMAN	P06396	30	59	35.5	782	85697	Gelsolin OS=Homo sapiens OX=9606 GN=GSN PE=1 SV=1	0.0013	1.2646
sp|P98088|MUC5A_HUMAN	P98088	34	55	13.9	5654	585574	Mucin-5AC OS=Homo sapiens OX=9606 GN=MUC5AC PE=1 SV=4	0.0002	0.3772
sp|P03973|SLPI_HUMAN	P03973	19	54	75.8	132	14326	Antileukoproteinase OS=Homo sapiens OX=9606 GN=SLPI PE=1 SV=2	0.0071	4.728
sp|P12035|K2C3_HUMAN	P12035	25	52	15.4	628	64417	Keratin, type II cytoskeletal 3 OS=Homo sapiens OX=9606 GN=KRT3 PE=1 SV=3	0.0014	0.4256
sp|Q01546|K22O_HUMAN	Q01546	21	49	15	638	65841	Keratin, type II cytoskeletal 2 oral OS=Homo sapiens OX=9606 GN=KRT76 PE=1 SV=2	0.0013	0.4125
sp|P07858|CATB_HUMAN	P07858	19	48	47.5	339	37822	Cathepsin B OS=Homo sapiens OX=9606 GN=CTSB PE=1 SV=3	0.0024	1.9854
sp|P15924|DESP_HUMAN	P15924	34	48	13.6	2871	331774	Desmoplakin OS=Homo sapiens OX=9606 GN=DSP PE=1 SV=3	0.0003	0.3677
sp|P61769|B2MG_HUMAN	P61769	16	47	78.2	119	13715	Beta-2-microglobulin OS=Homo sapiens OX=9606 GN=B2M PE=1 SV=1	0.0068	5.0534
sp|P68032|ACTC_HUMAN;sp|P68133|ACTS_HUMAN	P68032;P68133	23	47	34.7	377	42019	Actin, alpha cardiac muscle 1 OS=Homo sapiens OX=9606 GN=ACTC1 PE=1 SV=1	0.0022	1.2233
sp|Q5XKE5|K2C79_HUMAN	Q5XKE5	18	46	14.8	535	57836	Keratin, type II cytoskeletal 79 OS=Homo sapiens OX=9606 GN=KRT79 PE=1 SV=2	0.0015	0.406
sp|P04083|ANXA1_HUMAN	P04083	25	45	59	346	38714	Annexin A1 OS=Homo sapiens OX=9606 GN=ANXA1 PE=1 SV=2	0.0022	2.8905
sp|P80303|NUCB2_HUMAN	P80303	33	45	51.2	420	50223	Nucleobindin-2 OS=Homo sapiens OX=9606 GN=NUCB2 PE=1 SV=3	0.0019	2.2509
sp|Q8N474|SFRP1_HUMAN	Q8N474	16	45	38.9	314	35386	Secreted frizzled-related protein 1 OS=Homo sapiens OX=9606 GN=SFRP1 PE=1 SV=1	0.0025	1.4491
sp|P01034|CYTC_HUMAN	P01034	12	41	55.5	146	15799	Cystatin-C OS=Homo sapiens OX=9606 GN=CST3 PE=1 SV=1	0.0049	2.5892
sp|A0A0B4J1X5|HV374_HUMAN	A0A0B4J1X5	14	40	54.7	117	12840	Immunoglobulin heavy variable 3-74 OS=Homo sapiens OX=9606 GN=IGHV3-74 PE=3 SV=1	0.0059	2.5237
sp|P02814|SMR3B_HUMAN	P02814	4	39	65.8	79	8188	Submaxillary gland androgen-regulated protein 3B OS=Homo sapiens OX=9606 GN=SMR3B PE=1 SV=2	0.0085	3.5499
sp|P01009|A1AT_HUMAN	P01009	22	36	34	418	46737	Alpha-1-antitrypsin OS=Homo sapiens OX=9606 GN=SERPINA1 PE=1 SV=3	0.0015	1.1878
sp|P07602|SAP_HUMAN	P07602	18	36	29.8	524	58113	Prosaposin OS=Homo sapiens OX=9606 GN=PSAP PE=1 SV=2	0.0012	0.9861
sp|P20061|TCO1_HUMAN	P20061	17	36	35.1	433	48207	Transcobalamin-1 OS=Homo sapiens OX=9606 GN=TCN1 PE=1 SV=2	0.0014	1.2439
sp|P00751|CFAB_HUMAN	P00751	18	35	23.8	764	85533	Complement factor B OS=Homo sapiens OX=9606 GN=CFB PE=1 SV=2	0.0008	0.7298
sp|Q14697|GANAB_HUMAN	Q14697	18	35	20.2	944	106874	Neutral alpha-glucosidase AB OS=Homo sapiens OX=9606 GN=GANAB PE=1 SV=3	0.0006	0.5922
sp|Q86Y46|K2C73_HUMAN	Q86Y46	14	35	15.4	540	58923	Keratin, type II cytoskeletal 73 OS=Homo sapiens OX=9606 GN=KRT73 PE=1 SV=1	0.0011	0.4256
sp|P07355|ANXA2_HUMAN	P07355	21	34	55.5	339	38604	Annexin A2 OS=Homo sapiens OX=9606 GN=ANXA2 PE=1 SV=2	0.0017	2.5892
sp|P01772|HV333_HUMAN	P01772	14	33	50.4	117	13074	Immunoglobulin heavy variable 3-33 OS=Homo sapiens OX=9606 GN=IGHV3-33 PE=1 SV=2	0.0049	2.1915
sp|P07339|CATD_HUMAN	P07339	17	33	37.9	412	44552	Cathepsin D OS=Homo sapiens OX=9606 GN=CTSD PE=1 SV=1	0.0014	1.3933
sp|P0DP02|HVC33_HUMAN	P0DP02	13	33	50.4	117	12989	Immunoglobulin heavy variable 3-30-3 OS=Homo sapiens OX=9606 GN=IGHV3-30-3 PE=1 SV=1	0.0049	2.1915
sp|Q14515|SPRL1_HUMAN	Q14515	14	33	25.3	664	75208	SPARC-like protein 1 OS=Homo sapiens OX=9606 GN=SPARCL1 PE=1 SV=2	0.0009	0.7906
sp|P02647|APOA1_HUMAN	P02647	17	32	53.9	267	30778	Apolipoprotein A-I OS=Homo sapiens OX=9606 GN=APOA1 PE=1 SV=1	0.0021	2.4594
sp|P0DOX5|IGG1_HUMAN	P0DOX5	16	32	39.2	449	49329	Immunoglobulin gamma-1 heavy chain OS=Homo sapiens OX=9606 PE=1 SV=2	0.0012	1.466
sp|Q6MZM9|PRR27_HUMAN	Q6MZM9	4	32	19.2	219	22720	Proline-rich protein 27 OS=Homo sapiens OX=9606 GN=PRR27 PE=2 SV=1	0.0025	0.556
sp|P04792|HSPB1_HUMAN	P04792	13	31	56.1	205	22783	Heat shock protein beta-1 OS=Homo sapiens OX=9606 GN=HSPB1 PE=1 SV=2	0.0026	2.6392
sp|Q14CN4|K2C72_HUMAN	Q14CN4	13	30	14.9	511	55877	Keratin, type II cytoskeletal 72 OS=Homo sapiens OX=9606 GN=KRT72 PE=1 SV=2	0.001	0.4093
sp|P06733|ENOA_HUMAN	P06733	17	29	41.5	434	47169	Alpha-enolase OS=Homo sapiens OX=9606 GN=ENO1 PE=1 SV=2	0.0012	1.6002
sp|Q3SY84|K2C71_HUMAN	Q3SY84	14	29	19.5	523	57292	Keratin, type II cytoskeletal 71 OS=Homo sapiens OX=9606 GN=KRT71 PE=1 SV=3	0.001	0.5668
sp|P01780|HV307_HUMAN	P01780	14	28	47	117	12943	Immunoglobulin heavy variable 3-7 OS=Homo sapiens OX=9606 GN=IGHV3-7 PE=1 SV=2	0.0041	1.9512
sp|P05787|K2C8_HUMAN	P05787	14	28	11.8	483	53704	Keratin, type II cytoskeletal 8 OS=Homo sapiens OX=9606 GN=KRT8 PE=1 SV=7	0.001	0.3122
sp|Q02809|PLOD1_HUMAN	Q02809	12	28	21.7	727	83550	Procollagen-lysine,2-oxoglutarate 5-dioxygenase 1 OS=Homo sapiens OX=9606 GN=PLOD1 PE=1 SV=2	0.0007	0.6482
sp|P01011|AACT_HUMAN	P01011	14	27	27.4	423	47651	Alpha-1-antichymotrypsin OS=Homo sapiens OX=9606 GN=SERPINA3 PE=1 SV=2	0.0011	0.8793
sp|P01768|HV330_HUMAN;sp|P0DP03|HVC05_HUMAN	P01768;P0DP03	11	27	50.4	117	12947	Immunoglobulin heavy variable 3-30 OS=Homo sapiens OX=9606 GN=IGHV3-30 PE=1 SV=2	0.004	2.1915
sp|P06702|S10A9_HUMAN	P06702	12	27	45.6	114	13242	Protein S100-A9 OS=Homo sapiens OX=9606 GN=S100A9 PE=1 SV=1	0.0041	1.8576
sp|P05089|ARGI1_HUMAN	P05089	5	26	17.4	322	34735	Arginase-1 OS=Homo sapiens OX=9606 GN=ARG1 PE=1 SV=2	0.0014	0.4928
sp|Q7Z794|K2C1B_HUMAN	Q7Z794	11	26	14.2	578	61901	Keratin, type II cytoskeletal 1b OS=Homo sapiens OX=9606 GN=KRT77 PE=1 SV=3	0.0008	0.3868
sp|Q8N1N4|K2C78_HUMAN	Q8N1N4	13	26	19.2	520	56866	Keratin, type II cytoskeletal 78 OS=Homo sapiens OX=9606 GN=KRT78 PE=1 SV=2	0.0009	0.556
sp|Q96DA0|ZG16B_HUMAN	Q96DA0	14	26	54.3	208	22739	Zymogen granule protein 16 homolog B OS=Homo sapiens OX=9606 GN=ZG16B PE=1 SV=3	0.0022	2.4914
sp|A0A0B4J1V0|HV315_HUMAN	A0A0B4J1V0	11	25	57.1	119	12926	Immunoglobulin heavy variable 3-15 OS=Homo sapiens OX=9606 GN=IGHV3-15 PE=3 SV=1	0.0036	2.7239
sp|P55058|PLTP_HUMAN	P55058	12	25	16.4	493	54739	Phospholipid transfer protein OS=Homo sapiens OX=9606 GN=PLTP PE=1 SV=1	0.0009	0.4588
sp|A0A0B4J1Y9|HV372_HUMAN	A0A0B4J1Y9	10	24	57.1	119	13203	Immunoglobulin heavy variable 3-72 OS=Homo sapiens OX=9606 GN=IGHV3-72 PE=3 SV=1	0.0035	2.7239
sp|A0A0C4DH72|KV106_HUMAN	A0A0C4DH72	5	24	36.8	117	12697	Immunoglobulin kappa variable 1-6 OS=Homo sapiens OX=9606 GN=IGKV1-6 PE=3 SV=1	0.0035	1.3335
sp|P01763|HV348_HUMAN	P01763	10	24	44.4	117	12813	Immunoglobulin heavy variable 3-48 OS=Homo sapiens OX=9606 GN=IGHV3-48 PE=1 SV=2	0.0035	1.7797
sp|P08603|CFAH_HUMAN	P08603	13	24	12.8	1231	139096	Complement factor H OS=Homo sapiens OX=9606 GN=CFH PE=1 SV=4	0.0003	0.3428
sp|A0A0B4J1V1|HV321_HUMAN	A0A0B4J1V1	10	23	44.4	117	12840	Immunoglobulin heavy variable 3-21 OS=Homo sapiens OX=9606 GN=IGHV3-21 PE=1 SV=1	0.0034	1.7797
sp|P01597|KV139_HUMAN;sp|P04432|KVD39_HUMAN	P01597;P04432	4	22	36.8	117	12737	Immunoglobulin kappa variable 1-39 OS=Homo sapiens OX=9606 GN=IGKV1-39 PE=1 SV=2	0.0033	1.3335
sp|P01764|HV323_HUMAN	P01764	9	22	44.4	117	12582	Immunoglobulin heavy variable 3-23 OS=Homo sapiens OX=9606 GN=IGHV3-23 PE=1 SV=2	0.0033	1.7797
sp|P04406|G3P_HUMAN	P04406	13	22	48.7	335	36053	Glyceraldehyde-3-phosphate dehydrogenase OS=Homo sapiens OX=9606 GN=GAPDH PE=1 SV=3	0.0011	2.069
sp|P08729|K2C7_HUMAN	P08729	10	22	11.1	469	51386	Keratin, type II cytoskeletal 7 OS=Homo sapiens OX=9606 GN=KRT7 PE=1 SV=5	0.0008	0.2912
sp|P0DTE7|AMY1B_HUMAN;sp|P0DUB6|AMY1A_HUMAN;sp|P0DTE8|AMY1C_HUMAN	P0DTE7;P0DUB6;P0DTE8	15	22	33.1	511	57768	Alpha-amylase 1B OS=Homo sapiens OX=9606 GN=AMY1B PE=1 SV=1	0.0007	1.1429
sp|P14923|PLAK_HUMAN	P14923	14	22	21.6	745	81745	Junction plakoglobin OS=Homo sapiens OX=9606 GN=JUP PE=1 SV=3	0.0005	0.6444
sp|P49788|TIG1_HUMAN	P49788	12	22	27.2	294	33285	Retinoic acid receptor responder protein 1 OS=Homo sapiens OX=9606 GN=RARRES1 PE=1 SV=2	0.0013	0.8707
sp|Q5T749|KPRP_HUMAN	Q5T749	12	22	26.6	579	64136	Keratinocyte proline-rich protein OS=Homo sapiens OX=9606 GN=KPRP PE=1 SV=1	0.0007	0.845
sp|O00391|QSOX1_HUMAN	O00391	9	21	19.1	747	82578	Sulfhydryl oxidase 1 OS=Homo sapiens OX=9606 GN=QSOX1 PE=1 SV=3	0.0005	0.5524
sp|P0DP04|HV43D_HUMAN	P0DP04	8	21	44.1	118	13017	Immunoglobulin heavy variable 3-43D OS=Homo sapiens OX=9606 GN=IGHV3-43D PE=3 SV=1	0.0031	1.7606
sp|Q13217|DNJC3_HUMAN	Q13217	13	21	27.2	504	57580	DnaJ homolog subfamily C member 3 OS=Homo sapiens OX=9606 GN=DNAJC3 PE=1 SV=1	0.0007	0.8707
sp|A5A3E0|POTEF_HUMAN	A5A3E0	9	20	7.4	1075	121444	POTE ankyrin domain family member F OS=Homo sapiens OX=9606 GN=POTEF PE=1 SV=2	0.0003	0.1858
sp|P01782|HV309_HUMAN	P01782	7	20	44.1	118	12945	Immunoglobulin heavy variable 3-9 OS=Homo sapiens OX=9606 GN=IGHV3-9 PE=1 SV=2	0.0029	1.7606
sp|P05109|S10A8_HUMAN	P05109	11	20	53.8	93	10834	Protein S100-A8 OS=Homo sapiens OX=9606 GN=S100A8 PE=1 SV=1	0.0037	2.4514
sp|P60174|TPIS_HUMAN	P60174	10	20	46.6	249	26669	Triosephosphate isomerase OS=Homo sapiens OX=9606 GN=TPI1 PE=1 SV=4	0.0014	1.9242
sp|P02774|VTDB_HUMAN	P02774	12	19	35	474	52918	Vitamin D-binding protein OS=Homo sapiens OX=9606 GN=GC PE=1 SV=2	0.0007	1.2387
sp|P26447|S10A4_HUMAN	P26447	9	19	43.6	101	11728	Protein S100-A4 OS=Homo sapiens OX=9606 GN=S100A4 PE=1 SV=1	0.0033	1.729
sp|P62937|PPIA_HUMAN	P62937	8	19	57	165	18012	Peptidyl-prolyl cis-trans isomerase A OS=Homo sapiens OX=9606 GN=PPIA PE=1 SV=2	0.002	2.7154
sp|Q06830|PRDX1_HUMAN	Q06830	11	19	49.2	199	22110	Peroxiredoxin-1 OS=Homo sapiens OX=9606 GN=PRDX1 PE=1 SV=1	0.0017	2.1046
sp|Q96S96|PEBP4_HUMAN	Q96S96	7	19	35.7	227	25733	Phosphatidylethanolamine-binding protein 4 OS=Homo sapiens OX=9606 GN=PEBP4 PE=1 SV=3	0.0014	1.2751
sp|Q99456|K1C12_HUMAN	Q99456	7	19	11.3	494	53511	Keratin, type I cytoskeletal 12 OS=Homo sapiens OX=9606 GN=KRT12 PE=1 SV=1	0.0007	0.2972
sp|P01033|TIMP1_HUMAN	P01033	11	18	58	207	23171	Metalloproteinase inhibitor 1 OS=Homo sapiens OX=9606 GN=TIMP1 PE=1 SV=1	0.0015	2.8019
sp|P01860|IGHG3_HUMAN	P01860	9	18	24.9	446	49093	Immunoglobulin heavy constant gamma 3 OS=Homo sapiens OX=9606 GN=IGHG3 PE=1 SV=3	0.0007	0.7742
sp|P30740|ILEU_HUMAN	P30740	12	18	31.4	379	42742	Leukocyte elastase inhibitor OS=Homo sapiens OX=9606 GN=SERPINB1 PE=1 SV=1	0.0008	1.0606
sp|P34096|RNAS4_HUMAN	P34096	6	18	29.3	147	16840	Ribonuclease 4 OS=Homo sapiens OX=9606 GN=RNASE4 PE=1 SV=3	0.0021	0.9634
sp|P35900|K1C20_HUMAN	P35900	8	18	5	424	48487	Keratin, type I cytoskeletal 20 OS=Homo sapiens OX=9606 GN=KRT20 PE=1 SV=1	0.0007	0.122
sp|P59665|DEF1_HUMAN;sp|P59666|DEF3_HUMAN	P59665;P59666	6	18	20.2	94	10201	Neutrophil defensin 1 OS=Homo sapiens OX=9606 GN=DEFA1 PE=1 SV=1	0.0033	0.5922
sp|P81605|DCD_HUMAN	P81605	8	18	47.3	110	11284	Dermcidin OS=Homo sapiens OX=9606 GN=DCD PE=1 SV=2	0.0028	1.9717
sp|Q02413|DSG1_HUMAN	Q02413	9	18	11.2	1049	113748	Desmoglein-1 OS=Homo sapiens OX=9606 GN=DSG1 PE=1 SV=2	0.0003	0.2942
sp|Q02818|NUCB1_HUMAN	Q02818	13	18	22.6	461	53879	Nucleobindin-1 OS=Homo sapiens OX=9606 GN=NUCB1 PE=1 SV=4	0.0007	0.6827
sp|Q15782|CH3L2_HUMAN	Q15782	10	18	22.3	390	43501	Chitinase-3-like protein 2 OS=Homo sapiens OX=9606 GN=CHI3L2 PE=1 SV=1	0.0008	0.6711
sp|Q7Z3Y8|K1C27_HUMAN	Q7Z3Y8	9	18	16.3	459	49822	Keratin, type I cytoskeletal 27 OS=Homo sapiens OX=9606 GN=KRT27 PE=1 SV=2	0.0007	0.4555
sp|A0A0A0MS15|HV349_HUMAN	A0A0A0MS15	8	17	55.5	119	13056	Immunoglobulin heavy variable 3-49 OS=Homo sapiens OX=9606 GN=IGHV3-49 PE=3 SV=1	0.0025	2.5892
sp|A0A0J9YX35|HV64D_HUMAN	A0A0J9YX35	8	17	44.4	117	12823	Immunoglobulin heavy variable 3-64D OS=Homo sapiens OX=9606 GN=IGHV3-64D PE=3 SV=1	0.0025	1.7797
sp|P03950|ANGI_HUMAN	P03950	9	17	49.7	147	16550	Angiogenin OS=Homo sapiens OX=9606 GN=ANG PE=1 SV=1	0.002	2.1405
sp|P13987|CD59_HUMAN	P13987	9	17	28.1	128	14177	CD59 glycoprotein OS=Homo sapiens OX=9606 GN=CD59 PE=1 SV=1	0.0023	0.9099
sp|Q5D862|FILA2_HUMAN	Q5D862	8	17	5.6	2391	248072	Filaggrin-2 OS=Homo sapiens OX=9606 GN=FLG2 PE=1 SV=1	0.0001	0.1376
sp|A0A075B6R2|HV404_HUMAN	A0A075B6R2	5	16	24.8	117	12848	Immunoglobulin heavy variable 4-4 OS=Homo sapiens OX=9606 GN=IGHV4-4 PE=3 SV=2	0.0024	0.7701
sp|Q7Z3Z0|K1C25_HUMAN	Q7Z3Z0	8	16	16.2	450	49318	Keratin, type I cytoskeletal 25 OS=Homo sapiens OX=9606 GN=KRT25 PE=1 SV=1	0.0006	0.4521
sp|Q86X29|LSR_HUMAN	Q86X29	10	16	18	649	71439	Lipolysis-stimulated lipoprotein receptor OS=Homo sapiens OX=9606 GN=LSR PE=1 SV=4	0.0004	0.5136
sp|A0A087WSY4|HV432_HUMAN	A0A087WSY4	5	15	24.6	118	13025	Immunoglobulin heavy variable 4-30-2 OS=Homo sapiens OX=9606 GN=IGHV4-30-2 PE=3 SV=1	0.0022	0.762
sp|A0A0C4DH41|HV461_HUMAN;sp|P0DP08|HVD82_HUMAN;sp|P0DP06|HVD34_HUMAN;sp|P06331|HV434_HUMAN;sp|P01825|HV459_HUMAN;sp|P01824|HV439_HUMAN	A0A0C4DH41;P0DP08;P0DP06;P06331;P01825;P01824	5	15	26.3	118	13066	Immunoglobulin heavy variable 4-61 OS=Homo sapiens OX=9606 GN=IGHV4-61 PE=1 SV=1	0.0022	0.8323
sp|P01859|IGHG2_HUMAN	P01859	8	15	23	395	43806	Immunoglobulin heavy constant gamma 2 OS=Homo sapiens OX=9606 GN=IGHG2 PE=1 SV=3	0.0007	0.6982
sp|P02763|A1AG1_HUMAN	P02763	9	15	19.4	201	23540	Alpha-1-acid glycoprotein 1 OS=Homo sapiens OX=9606 GN=ORM1 PE=1 SV=2	0.0013	0.5631
sp|P0DMV8|HS71A_HUMAN;sp|P0DMV9|HS71B_HUMAN	P0DMV8;P0DMV9	10	15	18.4	641	70052	Heat shock 70 kDa protein 1A OS=Homo sapiens OX=9606 GN=HSPA1A PE=1 SV=1	0.0004	0.5276
sp|P14314|GLU2B_HUMAN	P14314	10	15	20.5	528	59425	Glucosidase 2 subunit beta OS=Homo sapiens OX=9606 GN=PRKCSH PE=1 SV=2	0.0005	0.6032
sp|P28799|GRN_HUMAN	P28799	8	15	16.9	593	63545	Progranulin OS=Homo sapiens OX=9606 GN=GRN PE=1 SV=2	0.0004	0.4757
sp|P29508|SPB3_HUMAN	P29508	8	15	25.1	390	44565	Serpin B3 OS=Homo sapiens OX=9606 GN=SERPINB3 PE=1 SV=2	0.0007	0.7824
sp|Q9BRK5|CAB45_HUMAN	Q9BRK5	8	15	27.1	362	41807	45 kDa calcium-binding protein OS=Homo sapiens OX=9606 GN=SDF4 PE=1 SV=1	0.0007	0.8664
sp|A0A0B4J1X8|HV343_HUMAN	A0A0B4J1X8	7	14	44.1	118	13077	Immunoglobulin heavy variable 3-43 OS=Homo sapiens OX=9606 GN=IGHV3-43 PE=3 SV=1	0.0021	1.7606
sp|P09211|GSTP1_HUMAN	P09211	7	14	52.9	210	23356	Glutathione S-transferase P OS=Homo sapiens OX=9606 GN=GSTP1 PE=1 SV=2	0.0012	2.3806
sp|A0A0B4J1V6|HV373_HUMAN	A0A0B4J1V6	5	13	24.4	119	12858	Immunoglobulin heavy variable 3-73 OS=Homo sapiens OX=9606 GN=IGHV3-73 PE=3 SV=1	0.0019	0.7539
sp|P01619|KV320_HUMAN	P01619	5	13	46.6	116	12557	Immunoglobulin kappa variable 3-20 OS=Homo sapiens OX=9606 GN=IGKV3-20 PE=1 SV=2	0.0019	1.9242
sp|P02790|HEMO_HUMAN	P02790	7	13	16.7	462	51676	Hemopexin OS=Homo sapiens OX=9606 GN=HPX PE=1 SV=2	0.0005	0.4689
sp|P06312|KV401_HUMAN	P06312	6	13	29.8	121	13380	Immunoglobulin kappa variable 4-1 OS=Homo sapiens OX=9606 GN=IGKV4-1 PE=1 SV=1	0.0019	0.9861
sp|P11021|BIP_HUMAN	P11021	10	13	19.3	654	72333	Endoplasmic reticulum chaperone BiP OS=Homo sapiens OX=9606 GN=HSPA5 PE=1 SV=2	0.0003	0.5596
sp|P15311|EZRI_HUMAN	P15311	10	13	17.1	586	69413	Ezrin OS=Homo sapiens OX=9606 GN=EZR PE=1 SV=4	0.0004	0.4825
sp|Q6UXB2|CXL17_HUMAN	Q6UXB2	7	13	39.5	119	13819	C-X-C motif chemokine 17 OS=Homo sapiens OX=9606 GN=CXCL17 PE=1 SV=1	0.0019	1.4831
sp|Q8NCM8|DYHC2_HUMAN	Q8NCM8	4	13	1	4307	492627	Cytoplasmic dynein 2 heavy chain 1 OS=Homo sapiens OX=9606 GN=DYNC2H1 PE=1 SV=4	0.0001	0.0233
sp|A0A075B6Q5|HV364_HUMAN	A0A075B6Q5	5	12	34.7	118	12891	Immunoglobulin heavy variable 3-64 OS=Homo sapiens OX=9606 GN=IGHV3-64 PE=3 SV=1	0.0018	1.2233
sp|A0A075B6S2|KVD29_HUMAN;sp|A2NJV5|KV229_HUMAN	A0A075B6S2;A2NJV5	4	12	25.8	120	13143	Immunoglobulin kappa variable 2D-29 OS=Homo sapiens OX=9606 GN=IGKV2D-29 PE=3 SV=1	0.0017	0.8113
sp|A0A0C4DH31|HV118_HUMAN	A0A0C4DH31	7	12	39.3	117	12820	Immunoglobulin heavy variable 1-18 OS=Homo sapiens OX=9606 GN=IGHV1-18 PE=3 SV=1	0.0018	1.4717
sp|P01602|KV105_HUMAN	P01602	5	12	32.5	117	12782	Immunoglobulin kappa variable 1-5 OS=Homo sapiens OX=9606 GN=IGKV1-5 PE=1 SV=2	0.0018	1.1135
sp|P01861|IGHG4_HUMAN	P01861	8	12	21.2	396	43832	Immunoglobulin heavy constant gamma 4 OS=Homo sapiens OX=9606 GN=IGHG4 PE=1 SV=2	0.0005	0.6293
sp|P31947|1433S_HUMAN	P31947	8	12	28.6	248	27774	14-3-3 protein sigma OS=Homo sapiens OX=9606 GN=SFN PE=1 SV=1	0.0008	0.932
sp|P63104|1433Z_HUMAN	P63104	7	12	26.1	245	27745	14-3-3 protein zeta/delta OS=Homo sapiens OX=9606 GN=YWHAZ PE=1 SV=1	0.0008	0.8239
sp|Q8NFT2|STEA2_HUMAN	Q8NFT2	1	12	1.6	490	56056	Metalloreductase STEAP2 OS=Homo sapiens OX=9606 GN=STEAP2 PE=1 SV=3	0.0004	0.0375
sp|A0A0A0MRZ8|KVD11_HUMAN;sp|P04433|KV311_HUMAN	A0A0A0MRZ8;P04433	4	11	32.2	115	12625	Immunoglobulin kappa variable 3D-11 OS=Homo sapiens OX=9606 GN=IGKV3D-11 PE=3 SV=6	0.0017	1.0989
sp|P01766|HV313_HUMAN	P01766	5	11	41.4	116	12506	Immunoglobulin heavy variable 3-13 OS=Homo sapiens OX=9606 GN=IGHV3-13 PE=1 SV=2	0.0016	1.5942
sp|P05090|APOD_HUMAN	P05090	6	11	32.8	189	21276	Apolipoprotein D OS=Homo sapiens OX=9606 GN=APOD PE=1 SV=1	0.001	1.1281
sp|P07237|PDIA1_HUMAN	P07237	7	11	13.8	508	57116	Protein disulfide-isomerase OS=Homo sapiens OX=9606 GN=P4HB PE=1 SV=3	0.0004	0.374
sp|P08571|CD14_HUMAN	P08571	5	11	21.1	375	40076	Monocyte differentiation antigen CD14 OS=Homo sapiens OX=9606 GN=CD14 PE=1 SV=2	0.0005	0.6255
sp|P0C0S8|H2A1_HUMAN;sp|Q9BTM1|H2AJ_HUMAN;sp|Q99878|H2A1J_HUMAN;sp|Q96KK5|H2A1H_HUMAN;sp|Q6FI13|H2A2A_HUMAN;sp|Q16777|H2A2C_HUMAN;sp|P20671|H2A1D_HUMAN	P0C0S8;Q9BTM1;Q99878;Q96KK5;Q6FI13;Q16777;P20671	4	11	35.4	130	14091	Histone H2A type 1 OS=Homo sapiens OX=9606 GN=H2AC11 PE=1 SV=2	0.0015	1.2594
sp|P31749|AKT1_HUMAN	P31749	2	11	5.4	480	55686	RAC-alpha serine/threonine-protein kinase OS=Homo sapiens OX=9606 GN=AKT1 PE=1 SV=2	0.0004	0.1324
sp|P32119|PRDX2_HUMAN	P32119	5	11	33.3	198	21892	Peroxiredoxin-2 OS=Homo sapiens OX=9606 GN=PRDX2 PE=1 SV=5	0.001	1.1528
sp|P68371|TBB4B_HUMAN	P68371	7	11	20.2	445	49831	Tubulin beta-4B chain OS=Homo sapiens OX=9606 GN=TUBB4B PE=1 SV=1	0.0004	0.5922
sp|Q08554|DSC1_HUMAN	Q08554	6	11	8.7	894	99987	Desmocollin-1 OS=Homo sapiens OX=9606 GN=DSC1 PE=1 SV=2	0.0002	0.2218
sp|Q92743|HTRA1_HUMAN	Q92743	8	11	17.1	480	51287	Serine protease HTRA1 OS=Homo sapiens OX=9606 GN=HTRA1 PE=1 SV=1	0.0004	0.4825
sp|A0A075B6P5|KV228_HUMAN;sp|P01615|KVD28_HUMAN;sp|P01614|KVD40_HUMAN;sp|A0A087WW87|KV240_HUMAN	A0A075B6P5;P01615;P01614;A0A087WW87	3	10	16.7	120	12957	Immunoglobulin kappa variable 2-28 OS=Homo sapiens OX=9606 GN=IGKV2-28 PE=3 SV=1	0.0014	0.4689
sp|A0A075B6S5|KV127_HUMAN	A0A075B6S5	3	10	34.2	117	12711	Immunoglobulin kappa variable 1-27 OS=Homo sapiens OX=9606 GN=IGKV1-27 PE=3 SV=1	0.0015	1.1979
sp|O00584|RNT2_HUMAN	O00584	7	10	27	256	29481	Ribonuclease T2 OS=Homo sapiens OX=9606 GN=RNASET2 PE=1 SV=2	0.0007	0.8621
sp|O43707|ACTN4_HUMAN	O43707	5	10	7.7	911	104854	Alpha-actinin-4 OS=Homo sapiens OX=9606 GN=ACTN4 PE=1 SV=2	0.0002	0.194
sp|O60814|H2B1K_HUMAN;sp|Q99880|H2B1L_HUMAN;sp|Q99879|H2B1M_HUMAN;sp|Q99877|H2B1N_HUMAN;sp|Q93079|H2B1H_HUMAN;sp|Q5QNW6|H2B2F_HUMAN;sp|P62807|H2B1C_HUMAN;sp|P58876|H2B1D_HUMAN;sp|P57053|H2BFS_HUMAN	O60814;Q99880;Q99879;Q99877;Q93079;Q5QNW6;P62807;P58876;P57053	7	10	45.2	126	13890	Histone H2B type 1-K OS=Homo sapiens OX=9606 GN=H2BC12 PE=1 SV=3	0.0014	1.8314
sp|P01624|KV315_HUMAN	P01624	4	10	32.2	115	12496	Immunoglobulin kappa variable 3-15 OS=Homo sapiens OX=9606 GN=IGKV3-15 PE=1 SV=2	0.0015	1.0989
sp|P04075|ALDOA_HUMAN	P04075	7	10	27.2	364	39420	Fructose-bisphosphate aldolase A OS=Homo sapiens OX=9606 GN=ALDOA PE=1 SV=2	0.0005	0.8707
sp|P0DJI8|SAA1_HUMAN	P0DJI8	4	10	45.1	122	13532	Serum amyloid A-1 protein OS=Homo sapiens OX=9606 GN=SAA1 PE=1 SV=1	0.0014	1.8249
sp|P0DTE1|HV383_HUMAN	P0DTE1	5	10	35.7	115	12671	Probable non-functional immunoglobulin heavy variable 3-38-3 OS=Homo sapiens OX=9606 GN=IGHV3-38-3 PE=1 SV=1	0.0015	1.2751
sp|P14618|KPYM_HUMAN	P14618	6	10	15.1	531	57937	Pyruvate kinase PKM OS=Homo sapiens OX=9606 GN=PKM PE=1 SV=4	0.0003	0.4158
sp|P31944|CASPE_HUMAN	P31944	7	10	20.2	242	27680	Caspase-14 OS=Homo sapiens OX=9606 GN=CASP14 PE=1 SV=2	0.0007	0.5922
sp|P68431|H31_HUMAN;sp|Q71DI3|H32_HUMAN;sp|Q16695|H31T_HUMAN;sp|P84243|H33_HUMAN	P68431;Q71DI3;Q16695;P84243	6	10	24.3	136	15404	Histone H3.1 OS=Homo sapiens OX=9606 GN=H3C1 PE=1 SV=2	0.0013	0.7498
sp|Q13162|PRDX4_HUMAN	Q13162	7	10	23.2	271	30540	Peroxiredoxin-4 OS=Homo sapiens OX=9606 GN=PRDX4 PE=1 SV=1	0.0006	0.7061
sp|Q96BQ1|FAM3D_HUMAN	Q96BQ1	6	10	21	224	24963	Protein FAM3D OS=Homo sapiens OX=9606 GN=FAM3D PE=1 SV=1	0.0008	0.6218
sp|Q99574|NEUS_HUMAN	Q99574	5	10	12.7	410	46427	Neuroserpin OS=Homo sapiens OX=9606 GN=SERPINI1 PE=1 SV=1	0.0004	0.3397
sp|A0A075B6K0|LV316_HUMAN	A0A075B6K0	5	9	26.1	115	12466	Immunoglobulin lambda variable 3-16 OS=Homo sapiens OX=9606 GN=IGLV3-16 PE=3 SV=2	0.0014	0.8239
sp|A0A0B4J2H0|HV69D_HUMAN;sp|P01742|HV169_HUMAN	A0A0B4J2H0;P01742	3	9	24.8	117	12660	Immunoglobulin heavy variable 1-69D OS=Homo sapiens OX=9606 GN=IGHV1-69D PE=1 SV=1	0.0013	0.7701
sp|A0A0C4DH68|KV224_HUMAN	A0A0C4DH68	4	9	20	120	13079	Immunoglobulin kappa variable 2-24 OS=Homo sapiens OX=9606 GN=IGKV2-24 PE=3 SV=1	0.0013	0.5849
sp|P00352|AL1A1_HUMAN	P00352	6	9	17.2	501	54862	Aldehyde dehydrogenase 1A1 OS=Homo sapiens OX=9606 GN=ALDH1A1 PE=1 SV=2	0.0003	0.4859
sp|P01700|LV147_HUMAN	P01700	4	9	29.1	117	12284	Immunoglobulin lambda variable 1-47 OS=Homo sapiens OX=9606 GN=IGLV1-47 PE=1 SV=2	0.0013	0.9543
sp|P01743|HV146_HUMAN	P01743	3	9	22.2	117	12933	Immunoglobulin heavy variable 1-46 OS=Homo sapiens OX=9606 GN=IGHV1-46 PE=1 SV=2	0.0013	0.6672
sp|P02750|A2GL_HUMAN	P02750	4	9	15.6	347	38178	Leucine-rich alpha-2-glycoprotein OS=Homo sapiens OX=9606 GN=LRG1 PE=1 SV=2	0.0004	0.4322
sp|P07437|TBB5_HUMAN	P07437	7	9	20.3	444	49671	Tubulin beta chain OS=Homo sapiens OX=9606 GN=TUBB PE=1 SV=2	0.0004	0.5959
sp|P0DP01|HV108_HUMAN	P0DP01	3	9	24.8	117	12992	Immunoglobulin heavy variable 1-8 OS=Homo sapiens OX=9606 GN=IGHV1-8 PE=1 SV=1	0.0013	0.7701
sp|P15328|FOLR1_HUMAN	P15328	5	9	24.5	257	29819	Folate receptor alpha OS=Homo sapiens OX=9606 GN=FOLR1 PE=1 SV=3	0.0006	0.7579
sp|P19957|ELAF_HUMAN	P19957	3	9	39.3	117	12270	Elafin OS=Homo sapiens OX=9606 GN=PI3 PE=1 SV=3	0.0013	1.4717
sp|P22352|GPX3_HUMAN	P22352	6	9	28.3	226	25402	Glutathione peroxidase 3 OS=Homo sapiens OX=9606 GN=GPX3 PE=1 SV=2	0.0007	0.9187
sp|Q13296|SG2A2_HUMAN	Q13296	3	9	12.9	93	10499	Mammaglobin-A OS=Homo sapiens OX=9606 GN=SCGB2A2 PE=1 SV=1	0.0017	0.3459
sp|Q13835|PKP1_HUMAN	Q13835	4	9	7.5	747	82861	Plakophilin-1 OS=Homo sapiens OX=9606 GN=PKP1 PE=1 SV=2	0.0002	0.1885
sp|Q8NBJ4|GOLM1_HUMAN	Q8NBJ4	6	9	13.5	401	45333	Golgi membrane protein 1 OS=Homo sapiens OX=9606 GN=GOLM1 PE=1 SV=1	0.0004	0.3646
sp|Q8NCL4|GALT6_HUMAN	Q8NCL4	7	9	13.3	622	71159	Polypeptide N-acetylgalactosaminyltransferase 6 OS=Homo sapiens OX=9606 GN=GALNT6 PE=1 SV=2	0.0003	0.3583
sp|A0A087WSY6|KVD15_HUMAN	A0A087WSY6	4	8	32.2	115	12534	Immunoglobulin kappa variable 3D-15 OS=Homo sapiens OX=9606 GN=IGKV3D-15 PE=3 SV=6	0.0012	1.0989
sp|A0A0C4DH25|KVD20_HUMAN	A0A0C4DH25	3	8	27.6	116	12515	Immunoglobulin kappa variable 3D-20 OS=Homo sapiens OX=9606 GN=IGKV3D-20 PE=3 SV=1	0.0012	0.888
sp|A0A0C4DH36|HV338_HUMAN	A0A0C4DH36	4	8	19	116	12759	Probable non-functional immunoglobulin heavy variable 3-38 OS=Homo sapiens OX=9606 GN=IGHV3-38 PE=1 SV=1	0.0012	0.5488
sp|A0A0C4DH67|KV108_HUMAN;sp|A0A0C4DH69|KV109_HUMAN	A0A0C4DH67;A0A0C4DH69	3	8	37.4	115	12537	Immunoglobulin kappa variable 1-8 OS=Homo sapiens OX=9606 GN=IGKV1-8 PE=3 SV=1	0.0012	1.3659
sp|O14773|TPP1_HUMAN	O14773	4	8	9.4	563	61248	Tripeptidyl-peptidase 1 OS=Homo sapiens OX=9606 GN=TPP1 PE=1 SV=2	0.0002	0.2417
sp|O43852|CALU_HUMAN	O43852	6	8	16.8	315	37107	Calumenin OS=Homo sapiens OX=9606 GN=CALU PE=1 SV=2	0.0004	0.4723
sp|P01023|A2MG_HUMAN	P01023	6	8	5.4	1474	163290	Alpha-2-macroglobulin OS=Homo sapiens OX=9606 GN=A2M PE=1 SV=3	0.0001	0.1324
sp|P01717|LV325_HUMAN	P01717	3	8	18.8	112	12011	Immunoglobulin lambda variable 3-25 OS=Homo sapiens OX=9606 GN=IGLV3-25 PE=1 SV=2	0.0012	0.5417
sp|P02675|FIBB_HUMAN	P02675	6	8	20.2	491	55928	Fibrinogen beta chain OS=Homo sapiens OX=9606 GN=FGB PE=1 SV=2	0.0003	0.5922
sp|P04004|VTNC_HUMAN	P04004	6	8	16.9	478	54306	Vitronectin OS=Homo sapiens OX=9606 GN=VTN PE=1 SV=1	0.0003	0.4757
sp|P05164|PERM_HUMAN	P05164	5	8	8.6	745	83869	Myeloperoxidase OS=Homo sapiens OX=9606 GN=MPO PE=1 SV=1	0.0002	0.219
sp|P06310|KV230_HUMAN	P06310	3	8	38.3	120	13185	Immunoglobulin kappa variable 2-30 OS=Homo sapiens OX=9606 GN=IGKV2-30 PE=3 SV=2	0.0012	1.4155
sp|P06703|S10A6_HUMAN	P06703	7	8	33.3	90	10180	Protein S100-A6 OS=Homo sapiens OX=9606 GN=S100A6 PE=1 SV=1	0.0015	1.1528
sp|P11142|HSP7C_HUMAN	P11142	6	8	10.8	646	70898	Heat shock cognate 71 kDa protein OS=Homo sapiens OX=9606 GN=HSPA8 PE=1 SV=1	0.0002	0.2823
sp|P20930|FILA_HUMAN	P20930	6	8	3.3	4061	435180	Filaggrin OS=Homo sapiens OX=9606 GN=FLG PE=1 SV=3	0	0.0789
sp|P23528|COF1_HUMAN;sp|Q9Y281|COF2_HUMAN	P23528;Q9Y281	3	8	13.9	166	18502	Cofilin-1 OS=Homo sapiens OX=9606 GN=CFL1 PE=1 SV=3	0.0008	0.3772
sp|P31151|S10A7_HUMAN	P31151	5	8	25.7	101	11471	Protein S100-A7 OS=Homo sapiens OX=9606 GN=S100A7 PE=1 SV=4	0.0014	0.8072
sp|Q13438|OS9_HUMAN	Q13438	6	8	12.3	667	75562	Protein OS-9 OS=Homo sapiens OX=9606 GN=OS9 PE=1 SV=1	0.0002	0.3274
sp|Q14508|WFDC2_HUMAN	Q14508	1	8	11.3	124	12993	WAP four-disulfide core domain protein 2 OS=Homo sapiens OX=9606 GN=WFDC2 PE=1 SV=2	0.0011	0.2972
sp|Q92896|GSLG1_HUMAN	Q92896	3	8	3.1	1179	134552	Golgi apparatus protein 1 OS=Homo sapiens OX=9606 GN=GLG1 PE=1 SV=2	0.0001	0.074
sp|A0A075B6I9|LV746_HUMAN	A0A075B6I9	3	7	21.4	117	12468	Immunoglobulin lambda variable 7-46 OS=Homo sapiens OX=9606 GN=IGLV7-46 PE=3 SV=4	0.001	0.6368
sp|A0A075B6K4|LV310_HUMAN	A0A075B6K4	3	7	16.5	115	12441	Immunoglobulin lambda variable 3-10 OS=Homo sapiens OX=9606 GN=IGLV3-10 PE=3 SV=2	0.0011	0.4622
sp|A0A0A0MT36|KVD21_HUMAN	A0A0A0MT36	3	7	34.2	114	12340	Immunoglobulin kappa variable 6D-21 OS=Homo sapiens OX=9606 GN=IGKV6D-21 PE=3 SV=1	0.0011	1.1979
sp|A0A0C4DH34|HV428_HUMAN	A0A0C4DH34	4	7	12.8	117	13124	Immunoglobulin heavy variable 4-28 OS=Homo sapiens OX=9606 GN=IGHV4-28 PE=3 SV=1	0.001	0.3428
sp|O00299|CLIC1_HUMAN	O00299	4	7	19.9	241	26923	Chloride intracellular channel protein 1 OS=Homo sapiens OX=9606 GN=CLIC1 PE=1 SV=4	0.0005	0.5812
sp|O43490|PROM1_HUMAN	O43490	5	7	7.2	865	97202	Prominin-1 OS=Homo sapiens OX=9606 GN=PROM1 PE=1 SV=1	0.0001	0.1803
sp|P01709|LV208_HUMAN	P01709	3	7	17.8	118	12382	Immunoglobulin lambda variable 2-8 OS=Homo sapiens OX=9606 GN=IGLV2-8 PE=1 SV=2	0.001	0.5066
sp|P02671|FIBA_HUMAN	P02671	4	7	6.4	866	94973	Fibrinogen alpha chain OS=Homo sapiens OX=9606 GN=FGA PE=1 SV=2	0.0001	0.1588
sp|P02679|FIBG_HUMAN	P02679	4	7	15.9	453	51512	Fibrinogen gamma chain OS=Homo sapiens OX=9606 GN=FGG PE=1 SV=3	0.0003	0.4421
sp|P02749|APOH_HUMAN	P02749	6	7	21.7	345	38298	Beta-2-glycoprotein 1 OS=Homo sapiens OX=9606 GN=APOH PE=1 SV=3	0.0004	0.6482
sp|P04430|KV116_HUMAN	P04430	3	7	34.2	117	12618	Immunoglobulin kappa variable 1-16 OS=Homo sapiens OX=9606 GN=IGKV1-16 PE=1 SV=2	0.001	1.1979
sp|P0DP23|CALM1_HUMAN;sp|P0DP25|CALM3_HUMAN;sp|P0DP24|CALM2_HUMAN	P0DP23;P0DP25;P0DP24	4	7	20.8	149	16838	Calmodulin-1 OS=Homo sapiens OX=9606 GN=CALM1 PE=1 SV=1	0.0008	0.6144
sp|P12830|CADH1_HUMAN	P12830	4	7	3.4	882	97456	Cadherin-1 OS=Homo sapiens OX=9606 GN=CDH1 PE=1 SV=3	0.0001	0.0814
sp|P17931|LEG3_HUMAN	P17931	4	7	17.6	250	26152	Galectin-3 OS=Homo sapiens OX=9606 GN=LGALS3 PE=1 SV=5	0.0005	0.4997
sp|P30044|PRDX5_HUMAN	P30044	3	7	20.6	214	22086	Peroxiredoxin-5, mitochondrial OS=Homo sapiens OX=9606 GN=PRDX5 PE=1 SV=4	0.0006	0.6069
sp|P31949|S10AB_HUMAN	P31949	5	7	41	105	11740	Protein S100-A11 OS=Homo sapiens OX=9606 GN=S100A11 PE=1 SV=2	0.0012	1.5704
sp|P60660|MYL6_HUMAN	P60660	3	7	25.8	151	16930	Myosin light polypeptide 6 OS=Homo sapiens OX=9606 GN=MYL6 PE=1 SV=2	0.0008	0.8113
sp|P68104|EF1A1_HUMAN;sp|Q5VTE0|EF1A3_HUMAN	P68104;Q5VTE0	6	7	15.8	462	50141	Elongation factor 1-alpha 1 OS=Homo sapiens OX=9606 GN=EEF1A1 PE=1 SV=1	0.0003	0.4388
sp|Q08431|MFGM_HUMAN	Q08431	4	7	15	387	43105	Lactadherin OS=Homo sapiens OX=9606 GN=MFGE8 PE=1 SV=3	0.0003	0.4125
sp|Q14118|DAG1_HUMAN	Q14118	5	7	7.9	895	97441	Dystroglycan 1 OS=Homo sapiens OX=9606 GN=DAG1 PE=1 SV=2	0.0001	0.1995
sp|Q16651|PRSS8_HUMAN	Q16651	4	7	9.6	343	36431	Prostasin OS=Homo sapiens OX=9606 GN=PRSS8 PE=1 SV=1	0.0004	0.2474
sp|Q9BWS9|CHID1_HUMAN	Q9BWS9	3	7	9.4	393	44941	Chitinase domain-containing protein 1 OS=Homo sapiens OX=9606 GN=CHID1 PE=1 SV=1	0.0003	0.2417
sp|A0A0C4DH38|HV551_HUMAN	A0A0C4DH38	2	6	23.1	117	12675	Immunoglobulin heavy variable 5-51 OS=Homo sapiens OX=9606 GN=IGHV5-51 PE=3 SV=1	0.0009	0.7022
sp|O60437|PEPL_HUMAN	O60437	5	6	3.5	1756	204745	Periplakin OS=Homo sapiens OX=9606 GN=PPL PE=1 SV=4	0.0001	0.0839
sp|P00558|PGK1_HUMAN	P00558	4	6	14.6	417	44615	Phosphoglycerate kinase 1 OS=Homo sapiens OX=9606 GN=PGK1 PE=1 SV=3	0.0002	0.3996
sp|P01593|KVD33_HUMAN;sp|P01594|KV133_HUMAN	P01593;P01594	1	6	13.7	117	12848	Immunoglobulin kappa variable 1D-33 OS=Homo sapiens OX=9606 GN=IGKV1D-33 PE=1 SV=2	0.0009	0.3709
sp|P10599|THIO_HUMAN	P10599	3	6	39	105	11737	Thioredoxin OS=Homo sapiens OX=9606 GN=TXN PE=1 SV=3	0.001	1.4547
sp|P23083|HV102_HUMAN	P23083	4	6	22.2	117	13085	Immunoglobulin heavy variable 1-2 OS=Homo sapiens OX=9606 GN=IGHV1-2 PE=1 SV=2	0.0009	0.6672
sp|P30838|AL3A1_HUMAN	P30838	4	6	11	453	50395	Aldehyde dehydrogenase, dimeric NADP-preferring OS=Homo sapiens OX=9606 GN=ALDH3A1 PE=1 SV=3	0.0002	0.2882
sp|P36955|PEDF_HUMAN	P36955	2	6	6.2	418	46312	Pigment epithelium-derived factor OS=Homo sapiens OX=9606 GN=SERPINF1 PE=1 SV=4	0.0002	0.1535
sp|P80748|LV321_HUMAN	P80748	3	6	29.9	117	12446	Immunoglobulin lambda variable 3-21 OS=Homo sapiens OX=9606 GN=IGLV3-21 PE=1 SV=2	0.0009	0.9907
sp|Q01469|FABP5_HUMAN	Q01469	5	6	53.3	135	15164	Fatty acid-binding protein 5 OS=Homo sapiens OX=9606 GN=FABP5 PE=1 SV=3	0.0008	2.4119
sp|Q02487|DSC2_HUMAN	Q02487	4	6	2.9	901	99962	Desmocollin-2 OS=Homo sapiens OX=9606 GN=DSC2 PE=1 SV=1	0.0001	0.0691
sp|Q6KB66|K2C80_HUMAN	Q6KB66	4	6	9.5	452	50525	Keratin, type II cytoskeletal 80 OS=Homo sapiens OX=9606 GN=KRT80 PE=1 SV=2	0.0002	0.2445
sp|Q8NES3|LFNG_HUMAN	Q8NES3	3	6	14.8	379	41773	Beta-1,3-N-acetylglucosaminyltransferase lunatic fringe OS=Homo sapiens OX=9606 GN=LFNG PE=1 SV=2	0.0003	0.406
sp|Q8WVQ1|CANT1_HUMAN	Q8WVQ1	4	6	11.7	401	44840	Soluble calcium-activated nucleotidase 1 OS=Homo sapiens OX=9606 GN=CANT1 PE=1 SV=1	0.0003	0.3092
sp|Q9UJJ9|GNPTG_HUMAN	Q9UJJ9	3	6	18	305	33974	N-acetylglucosamine-1-phosphotransferase subunit gamma OS=Homo sapiens OX=9606 GN=GNPTG PE=1 SV=1	0.0003	0.5136
sp|A0A0C4DH24|KV621_HUMAN	A0A0C4DH24	3	5	34.2	114	12430	Immunoglobulin kappa variable 6-21 OS=Homo sapiens OX=9606 GN=IGKV6-21 PE=3 SV=1	0.0008	1.1979
sp|A0A0J9YXX1|HV5X1_HUMAN	A0A0J9YXX1	3	5	19.7	117	12773	Immunoglobulin heavy variable 5-10-1 OS=Homo sapiens OX=9606 GN=IGHV5-10-1 PE=3 SV=1	0.0007	0.574
sp|A6NKL6|T200C_HUMAN	A6NKL6	1	5	1.1	621	63928	Transmembrane protein 200C OS=Homo sapiens OX=9606 GN=TMEM200C PE=2 SV=2	0.0001	0.0257
sp|O75888|TNF13_HUMAN	O75888	3	5	10	250	27433	Tumor necrosis factor ligand superfamily member 13 OS=Homo sapiens OX=9606 GN=TNFSF13 PE=1 SV=1	0.0003	0.2589
sp|O95841|ANGL1_HUMAN	O95841	2	5	5.3	491	56720	Angiopoietin-related protein 1 OS=Homo sapiens OX=9606 GN=ANGPTL1 PE=2 SV=1	0.0002	0.1298
sp|P00338|LDHA_HUMAN	P00338	4	5	11.4	332	36689	L-lactate dehydrogenase A chain OS=Homo sapiens OX=9606 GN=LDHA PE=1 SV=2	0.0003	0.3002
sp|P02652|APOA2_HUMAN	P02652	2	5	21	100	11175	Apolipoprotein A-II OS=Homo sapiens OX=9606 GN=APOA2 PE=1 SV=1	0.0009	0.6218
sp|P02765|FETUA_HUMAN	P02765	2	5	11.2	367	39341	Alpha-2-HS-glycoprotein OS=Homo sapiens OX=9606 GN=AHSG PE=1 SV=2	0.0002	0.2942
sp|P07737|PROF1_HUMAN	P07737	3	5	25.7	140	15054	Profilin-1 OS=Homo sapiens OX=9606 GN=PFN1 PE=1 SV=2	0.0006	0.8072
sp|P07996|TSP1_HUMAN	P07996	3	5	3.5	1170	129383	Thrombospondin-1 OS=Homo sapiens OX=9606 GN=THBS1 PE=1 SV=2	0.0001	0.0839
sp|P09237|MMP7_HUMAN	P09237	2	5	11.2	267	29677	Matrilysin OS=Homo sapiens OX=9606 GN=MMP7 PE=1 SV=1	0.0003	0.2942
sp|P19021|AMD_HUMAN	P19021	4	5	6.8	973	108332	Peptidyl-glycine alpha-amidating monooxygenase OS=Homo sapiens OX=9606 GN=PAM PE=1 SV=2	0.0001	0.1695
sp|P19652|A1AG2_HUMAN	P19652	3	5	16.4	201	23603	Alpha-1-acid glycoprotein 2 OS=Homo sapiens OX=9606 GN=ORM2 PE=1 SV=2	0.0004	0.4588
sp|P25774|CATS_HUMAN	P25774	2	5	9.4	331	37496	Cathepsin S OS=Homo sapiens OX=9606 GN=CTSS PE=1 SV=3	0.0003	0.2417
sp|P40394|ADH7_HUMAN	P40394	3	5	10.6	386	41481	All-trans-retinol dehydrogenase [NAD(+)] ADH7 OS=Homo sapiens OX=9606 GN=ADH7 PE=1 SV=2	0.0002	0.2764
sp|P40925|MDHC_HUMAN	P40925	3	5	11.4	334	36426	Malate dehydrogenase, cytoplasmic OS=Homo sapiens OX=9606 GN=MDH1 PE=1 SV=4	0.0003	0.3002
sp|P62805|H4_HUMAN	P62805	5	5	51.5	103	11367	Histone H4 OS=Homo sapiens OX=9606 GN=H4C1 PE=1 SV=2	0.0008	2.2734
sp|P68363|TBA1B_HUMAN	P68363	4	5	13.7	451	50152	Tubulin alpha-1B chain OS=Homo sapiens OX=9606 GN=TUBA1B PE=1 SV=1	0.0002	0.3709
sp|Q13510|ASAH1_HUMAN	Q13510	3	5	6.6	395	44660	Acid ceramidase OS=Homo sapiens OX=9606 GN=ASAH1 PE=1 SV=5	0.0002	0.1641
sp|Q13867|BLMH_HUMAN	Q13867	3	5	9.7	455	52562	Bleomycin hydrolase OS=Homo sapiens OX=9606 GN=BLMH PE=1 SV=1	0.0002	0.2503
sp|Q86YZ3|HORN_HUMAN	Q86YZ3	4	5	6.7	2850	282389	Hornerin OS=Homo sapiens OX=9606 GN=HRNR PE=1 SV=2	0	0.1668
sp|Q9UBG3|CRNN_HUMAN	Q9UBG3	3	5	10.9	495	53533	Cornulin OS=Homo sapiens OX=9606 GN=CRNN PE=1 SV=1	0.0002	0.2853
sp|A0A075B6H9|LV469_HUMAN	A0A075B6H9	2	4	21.8	119	12773	Immunoglobulin lambda variable 4-69 OS=Homo sapiens OX=9606 GN=IGLV4-69 PE=1 SV=1	0.0006	0.652
sp|A0A075B6J9|LV218_HUMAN	A0A075B6J9	3	4	28.8	118	12412	Immunoglobulin lambda variable 2-18 OS=Homo sapiens OX=9606 GN=IGLV2-18 PE=3 SV=2	0.0006	0.9409
sp|A0A0C4DH35|HV335_HUMAN	A0A0C4DH35	2	4	15.4	117	12810	Probable non-functional immunoglobulin heavy variable 3-35 OS=Homo sapiens OX=9606 GN=IGHV3-35 PE=1 SV=1	0.0006	0.4256
sp|B0FP48|UPK3L_HUMAN;sp|E5RIL1|UPKL2_HUMAN	B0FP48;E5RIL1	2	4	8	263	28385	Uroplakin-3b-like protein 1 OS=Homo sapiens OX=9606 GN=UPK3BL1 PE=2 SV=1	0.0003	0.2023
sp|O14745|NHRF1_HUMAN	O14745	2	4	7.8	358	38868	Na(+)/H(+) exchange regulatory cofactor NHE-RF1 OS=Homo sapiens OX=9606 GN=NHERF1 PE=1 SV=4	0.0002	0.1967
sp|P01601|KVD16_HUMAN	P01601	2	4	18.8	117	12730	Immunoglobulin kappa variable 1D-16 OS=Homo sapiens OX=9606 GN=IGKV1D-16 PE=3 SV=2	0.0006	0.5417
sp|P01706|LV211_HUMAN	P01706	3	4	50.4	119	12644	Immunoglobulin lambda variable 2-11 OS=Homo sapiens OX=9606 GN=IGLV2-11 PE=1 SV=2	0.0006	2.1915
sp|P04040|CATA_HUMAN	P04040	3	4	8.3	527	59756	Catalase OS=Homo sapiens OX=9606 GN=CAT PE=1 SV=3	0.0001	0.2106
sp|P07686|HEXB_HUMAN	P07686	2	4	5.9	556	63137	Beta-hexosaminidase subunit beta OS=Homo sapiens OX=9606 GN=HEXB PE=1 SV=4	0.0001	0.1455
sp|P07711|CATL1_HUMAN	P07711	3	4	12	333	37564	Procathepsin L OS=Homo sapiens OX=9606 GN=CTSL PE=1 SV=2	0.0002	0.3183
sp|P08311|CATG_HUMAN	P08311	3	4	14.1	255	28837	Cathepsin G OS=Homo sapiens OX=9606 GN=CTSG PE=1 SV=2	0.0003	0.3836
sp|P16035|TIMP2_HUMAN	P16035	1	4	6.8	220	24399	Metalloproteinase inhibitor 2 OS=Homo sapiens OX=9606 GN=TIMP2 PE=1 SV=2	0.0003	0.1695
sp|P21741|MK_HUMAN	P21741	3	4	34.3	143	15585	Midkine OS=Homo sapiens OX=9606 GN=MDK PE=1 SV=1	0.0005	1.2029
sp|P22528|SPR1B_HUMAN	P22528	2	4	34.8	89	9888	Cornifin-B OS=Homo sapiens OX=9606 GN=SPRR1B PE=1 SV=2	0.0008	1.2284
sp|P35321|SPR1A_HUMAN	P35321	2	4	34.8	89	9877	Cornifin-A OS=Homo sapiens OX=9606 GN=SPRR1A PE=1 SV=2	0.0008	1.2284
sp|Q15293|RCN1_HUMAN	Q15293	2	4	8.5	331	38890	Reticulocalbin-1 OS=Homo sapiens OX=9606 GN=RCN1 PE=1 SV=1	0.0002	0.2162
sp|Q96DR8|MUCL1_HUMAN	Q96DR8	1	4	10	90	9039	Mucin-like protein 1 OS=Homo sapiens OX=9606 GN=MUCL1 PE=1 SV=1	0.0008	0.2589
sp|Q96GS6|AB17A_HUMAN	Q96GS6	1	4	2.3	310	33990	Alpha/beta hydrolase domain-containing protein 17A OS=Homo sapiens OX=9606 GN=ABHD17A PE=1 SV=1	0.0002	0.0544
sp|Q9NZT1|CALL5_HUMAN	Q9NZT1	3	4	21.9	146	15892	Calmodulin-like protein 5 OS=Homo sapiens OX=9606 GN=CALML5 PE=1 SV=2	0.0005	0.6558
sp|A0A0A0MS14|HV145_HUMAN	A0A0A0MS14	1	3	9.4	117	13508	Immunoglobulin heavy variable 1-45 OS=Homo sapiens OX=9606 GN=IGHV1-45 PE=3 SV=1	0.0004	0.2417
sp|A0A0C4DH43|HV70D_HUMAN	A0A0C4DH43	2	3	17.6	119	13312	Immunoglobulin heavy variable 2-70D OS=Homo sapiens OX=9606 GN=IGHV2-70D PE=3 SV=1	0.0004	0.4997
sp|O75787|RENR_HUMAN	O75787	2	3	7.4	350	39008	Renin receptor OS=Homo sapiens OX=9606 GN=ATP6AP2 PE=1 SV=2	0.0001	0.1858
sp|P01008|ANT3_HUMAN	P01008	2	3	5	464	52602	Antithrombin-III OS=Homo sapiens OX=9606 GN=SERPINC1 PE=1 SV=1	0.0001	0.122
sp|P01701|LV151_HUMAN	P01701	2	3	35.9	117	12249	Immunoglobulin lambda variable 1-51 OS=Homo sapiens OX=9606 GN=IGLV1-51 PE=1 SV=2	0.0004	1.2856
sp|P02656|APOC3_HUMAN	P02656	2	3	19.2	99	10852	Apolipoprotein C-III OS=Homo sapiens OX=9606 GN=APOC3 PE=1 SV=1	0.0005	0.556
sp|P04155|TFF1_HUMAN	P04155	3	3	32.1	84	9149	Trefoil factor 1 OS=Homo sapiens OX=9606 GN=TFF1 PE=1 SV=1	0.0006	1.0941
sp|P04439|HLAA_HUMAN	P04439	2	3	7.4	365	40841	HLA class I histocompatibility antigen, A alpha chain OS=Homo sapiens OX=9606 GN=HLA-A PE=1 SV=2	0.0001	0.1858
sp|P08174|DAF_HUMAN	P08174	2	3	4.5	381	41400	Complement decay-accelerating factor OS=Homo sapiens OX=9606 GN=CD55 PE=1 SV=4	0.0001	0.1092
sp|P08582|TRFM_HUMAN	P08582	2	3	4.3	738	80215	Melanotransferrin OS=Homo sapiens OX=9606 GN=MELTF PE=1 SV=2	0.0001	0.1041
sp|P08758|ANXA5_HUMAN	P08758	3	3	12.5	320	35937	Annexin A5 OS=Homo sapiens OX=9606 GN=ANXA5 PE=1 SV=2	0.0002	0.3335
sp|P15515|HIS1_HUMAN	P15515	2	3	36.8	57	6963	Histatin-1 OS=Homo sapiens OX=9606 GN=HTN1 PE=1 SV=2	0.0009	1.3335
sp|P16070|CD44_HUMAN	P16070	2	3	3	742	81538	CD44 antigen OS=Homo sapiens OX=9606 GN=CD44 PE=1 SV=3	0.0001	0.0715
sp|P25815|S100P_HUMAN	P25815	2	3	17.9	95	10400	Protein S100-P OS=Homo sapiens OX=9606 GN=S100P PE=1 SV=2	0.0005	0.5101
sp|P30086|PEBP1_HUMAN	P30086	2	3	11.2	187	21057	Phosphatidylethanolamine-binding protein 1 OS=Homo sapiens OX=9606 GN=PEBP1 PE=1 SV=3	0.0003	0.2942
sp|P30101|PDIA3_HUMAN	P30101	3	3	6.7	505	56782	Protein disulfide-isomerase A3 OS=Homo sapiens OX=9606 GN=PDIA3 PE=1 SV=4	0.0001	0.1668
sp|P43251|BTD_HUMAN	P43251	2	3	7	543	61133	Biotinidase OS=Homo sapiens OX=9606 GN=BTD PE=1 SV=2	0.0001	0.1749
sp|P50897|PPT1_HUMAN	P50897	2	3	10.8	306	34193	Palmitoyl-protein thioesterase 1 OS=Homo sapiens OX=9606 GN=PPT1 PE=1 SV=1	0.0002	0.2823
sp|P60953|CDC42_HUMAN	P60953	2	3	11	191	21259	Cell division control protein 42 homolog OS=Homo sapiens OX=9606 GN=CDC42 PE=1 SV=2	0.0003	0.2882
sp|P61916|NPC2_HUMAN	P61916	3	3	37.7	151	16570	NPC intracellular cholesterol transporter 2 OS=Homo sapiens OX=9606 GN=NPC2 PE=1 SV=1	0.0003	1.3823
sp|Q04609|FOLH1_HUMAN	Q04609	2	3	3.5	750	84331	Glutamate carboxypeptidase 2 OS=Homo sapiens OX=9606 GN=FOLH1 PE=1 SV=1	0.0001	0.0839
sp|Q86UD1|OAF_HUMAN	Q86UD1	1	3	4	273	30688	Out at first protein homolog OS=Homo sapiens OX=9606 GN=OAF PE=2 SV=1	0.0002	0.0965
sp|Q8WVV4|POF1B_HUMAN	Q8WVV4	2	3	3.2	589	68065	Protein POF1B OS=Homo sapiens OX=9606 GN=POF1B PE=1 SV=3	0.0001	0.0765
sp|Q9HCY8|S10AE_HUMAN	Q9HCY8	2	3	25	104	11662	Protein S100-A14 OS=Homo sapiens OX=9606 GN=S100A14 PE=1 SV=1	0.0005	0.7783
sp|O75629|CREG1_HUMAN	O75629	2	2	15	220	24075	Protein CREG1 OS=Homo sapiens OX=9606 GN=CREG1 PE=1 SV=1	0.0002	0.4125
sp|P02649|APOE_HUMAN	P02649	2	2	6.3	317	36154	Apolipoprotein E OS=Homo sapiens OX=9606 GN=APOE PE=1 SV=1	0.0001	0.1561
sp|P02753|RET4_HUMAN	P02753	1	2	5	201	23010	Retinol-binding protein 4 OS=Homo sapiens OX=9606 GN=RBP4 PE=1 SV=3	0.0002	0.122
sp|P04080|CYTB_HUMAN	P04080	1	2	12.2	98	11140	Cystatin-B OS=Homo sapiens OX=9606 GN=CSTB PE=1 SV=2	0.0004	0.3243
sp|P05186|PPBT_HUMAN	P05186	2	2	7.1	524	57305	Alkaline phosphatase, tissue-nonspecific isozyme OS=Homo sapiens OX=9606 GN=ALPL PE=1 SV=4	0.0001	0.1776
sp|P07384|CAN1_HUMAN	P07384	1	2	1.8	714	81890	Calpain-1 catalytic subunit OS=Homo sapiens OX=9606 GN=CAPN1 PE=1 SV=1	0	0.0423
sp|P09758|TACD2_HUMAN	P09758	2	2	9.9	323	35709	Tumor-associated calcium signal transducer 2 OS=Homo sapiens OX=9606 GN=TACSTD2 PE=1 SV=3	0.0001	0.256
sp|P10412|H14_HUMAN;sp|Q02539|H11_HUMAN;sp|P22492|H1T_HUMAN;sp|P16403|H12_HUMAN;sp|P16402|H13_HUMAN	P10412;Q02539;P22492;P16403;P16402	2	2	6.8	219	21865	Histone H1.4 OS=Homo sapiens OX=9606 GN=H1-4 PE=1 SV=2	0.0002	0.1695
sp|P13284|GILT_HUMAN	P13284	1	2	4.4	250	27964	Gamma-interferon-inducible lysosomal thiol reductase OS=Homo sapiens OX=9606 GN=IFI30 PE=1 SV=3	0.0001	0.1066
sp|P15104|GLNA_HUMAN	P15104	1	2	4.3	373	42064	Glutamine synthetase OS=Homo sapiens OX=9606 GN=GLUL PE=1 SV=4	0.0001	0.1041
sp|P15309|PPAP_HUMAN	P15309	2	2	6.5	386	44566	Prostatic acid phosphatase OS=Homo sapiens OX=9606 GN=ACP3 PE=1 SV=3	0.0001	0.1614
sp|P20160|CAP7_HUMAN	P20160	1	2	4	251	26886	Azurocidin OS=Homo sapiens OX=9606 GN=AZU1 PE=1 SV=3	0.0001	0.0965
sp|P22392|NDKB_HUMAN	P22392	2	2	23	152	17298	Nucleoside diphosphate kinase B OS=Homo sapiens OX=9606 GN=NME2 PE=1 SV=1	0.0002	0.6982
sp|P27105|STOM_HUMAN	P27105	2	2	6.6	288	31731	Stomatin OS=Homo sapiens OX=9606 GN=STOM PE=1 SV=3	0.0001	0.1641
sp|P36952|SPB5_HUMAN	P36952	2	2	7.7	375	42100	Serpin B5 OS=Homo sapiens OX=9606 GN=SERPINB5 PE=1 SV=2	0.0001	0.194
sp|P52209|6PGD_HUMAN	P52209	2	2	6.2	483	53140	6-phosphogluconate dehydrogenase, decarboxylating OS=Homo sapiens OX=9606 GN=PGD PE=1 SV=3	0.0001	0.1535
sp|P53634|CATC_HUMAN	P53634	1	2	2.4	463	51854	Dipeptidyl peptidase 1 OS=Homo sapiens OX=9606 GN=CTSC PE=1 SV=2	0.0001	0.0568
sp|P62987|RL40_HUMAN	P62987	2	2	19.5	128	14728	Ubiquitin-ribosomal protein eL40 fusion protein OS=Homo sapiens OX=9606 GN=UBA52 PE=1 SV=2	0.0003	0.5668
sp|Q01459|DIAC_HUMAN	Q01459	2	2	8.3	385	43760	Di-N-acetylchitobiase OS=Homo sapiens OX=9606 GN=CTBS PE=1 SV=1	0.0001	0.2106
sp|Q08188|TGM3_HUMAN	Q08188	2	2	5.3	693	76632	Protein-glutamine gamma-glutamyltransferase E OS=Homo sapiens OX=9606 GN=TGM3 PE=1 SV=4	0	0.1298
sp|Q11201|SIA4A_HUMAN	Q11201	2	2	9.4	340	39075	CMP-N-acetylneuraminate-beta-galactosamide-alpha-2,3-sialyltransferase 1 OS=Homo sapiens OX=9606 GN=ST3GAL1 PE=1 SV=1	0.0001	0.2417
sp|Q6UXB3|LYPD2_HUMAN	Q6UXB3	1	2	11.2	125	13115	Ly6/PLAUR domain-containing protein 2 OS=Homo sapiens OX=9606 GN=LYPD2 PE=1 SV=1	0.0003	0.2942
sp|Q6ZVX7|FBX50_HUMAN	Q6ZVX7	2	2	8.4	275	30847	F-box only protein 50 OS=Homo sapiens OX=9606 GN=NCCRP1 PE=1 SV=1	0.0001	0.2134
sp|Q7Z7M9|GALT5_HUMAN	Q7Z7M9	2	2	3	940	106266	Polypeptide N-acetylgalactosaminyltransferase 5 OS=Homo sapiens OX=9606 GN=GALNT5 PE=1 SV=1	0	0.0715
sp|Q8NBJ7|SUMF2_HUMAN	Q8NBJ7	2	2	8.3	301	33843	Inactive C-alpha-formylglycine-generating enzyme 2 OS=Homo sapiens OX=9606 GN=SUMF2 PE=1 SV=2	0.0001	0.2106
sp|Q8WXG9|AGRV1_HUMAN	Q8WXG9	1	2	0.1	6306	693082	Adhesion G-protein coupled receptor V1 OS=Homo sapiens OX=9606 GN=ADGRV1 PE=1 SV=2	0	0.0023
sp|Q9UBC9|SPRR3_HUMAN	Q9UBC9	2	2	18.9	169	18154	Small proline-rich protein 3 OS=Homo sapiens OX=9606 GN=SPRR3 PE=1 SV=2	0.0002	0.5453
sp|A0A087WSX0|LV545_HUMAN	A0A087WSX0	1	1	13.8	123	13162	Immunoglobulin lambda variable 5-45 OS=Homo sapiens OX=9606 GN=IGLV5-45 PE=3 SV=1	0.0001	0.374
sp|A6NIZ1|RP1BL_HUMAN;sp|P62834|RAP1A_HUMAN;sp|P61224|RAP1B_HUMAN	A6NIZ1;P62834;P61224	1	1	7.6	184	20925	Ras-related protein Rap-1b-like protein OS=Homo sapiens OX=9606 GN=RAP1BL PE=2 SV=1	0.0001	0.1912
sp|O60888|CUTA_HUMAN	O60888	1	1	7.8	179	19116	Protein CutA OS=Homo sapiens OX=9606 GN=CUTA PE=1 SV=2	0.0001	0.1967
sp|O60911|CATL2_HUMAN	O60911	1	1	8.4	334	37329	Cathepsin L2 OS=Homo sapiens OX=9606 GN=CTSV PE=1 SV=2	0.0001	0.2134
sp|O75094|SLIT3_HUMAN	O75094	1	1	0.9	1523	167712	Slit homolog 3 protein OS=Homo sapiens OX=9606 GN=SLIT3 PE=2 SV=3	0	0.0209
sp|O75841|UPK1B_HUMAN	O75841	1	1	6.9	260	29643	Uroplakin-1b OS=Homo sapiens OX=9606 GN=UPK1B PE=1 SV=5	0.0001	0.1722
sp|O75874|IDHC_HUMAN	O75874	1	1	3.1	414	46659	Isocitrate dehydrogenase [NADP] cytoplasmic OS=Homo sapiens OX=9606 GN=IDH1 PE=1 SV=2	0	0.074
sp|O95436|NPT2B_HUMAN	O95436	1	1	2.6	690	75759	Sodium-dependent phosphate transport protein 2B OS=Homo sapiens OX=9606 GN=SLC34A2 PE=1 SV=3	0	0.0617
sp|O95716|RAB3D_HUMAN;sp|Q9NRW1|RAB6B_HUMAN;sp|Q9H0U4|RAB1B_HUMAN;sp|Q9H082|RB33B_HUMAN;sp|Q96E17|RAB3C_HUMAN;sp|Q96DA2|RB39B_HUMAN;sp|Q96AX2|RAB37_HUMAN;sp|Q92930|RAB8B_HUMAN;sp|Q92928|RAB1C_HUMAN;sp|Q86YS6|RAB43_HUMAN;sp|Q6IQ22|RAB12_HUMAN;sp|Q15771|RAB30_HUMAN;sp|Q15286|RAB35_HUMAN;sp|Q14964|RB39A_HUMAN;sp|P62820|RAB1A_HUMAN;sp|P61106|RAB14_HUMAN;sp|P61026|RAB10_HUMAN;sp|P61018|RAB4B_HUMAN;sp|…	O95716;Q9NRW1;Q9H0U4;Q9H082;Q96E17;Q96DA2;Q96AX2;Q92930;Q92928;Q86YS6;Q6IQ22;Q15771;Q15286;Q14964;P62820;P61106;P61026;P61018;P61006;P59190;P20340;P20338;P20337;P20336	1	1	5	219	24267	Ras-related protein Rab-3D OS=Homo sapiens OX=9606 GN=RAB3D PE=1 SV=1	0.0001	0.122
sp|O95994|AGR2_HUMAN	O95994	1	1	10.3	175	19979	Anterior gradient protein 2 homolog OS=Homo sapiens OX=9606 GN=AGR2 PE=1 SV=1	0.0001	0.2677
sp|P00734|THRB_HUMAN	P00734	1	1	2.1	622	70037	Prothrombin OS=Homo sapiens OX=9606 GN=F2 PE=1 SV=2	0	0.0495
sp|P02808|STAT_HUMAN	P02808	1	1	48.4	62	7304	Statherin OS=Homo sapiens OX=9606 GN=STATH PE=1 SV=2	0.0003	2.0479
sp|P04066|FUCO_HUMAN	P04066	1	1	3.6	466	53689	Tissue alpha-L-fucosidase OS=Homo sapiens OX=9606 GN=FUCA1 PE=1 SV=4	0	0.0864
sp|P0C0L4|CO4A_HUMAN;sp|P0C0L5|CO4B_HUMAN	P0C0L4;P0C0L5	1	1	0.9	1744	192784	Complement C4-A OS=Homo sapiens OX=9606 GN=C4A PE=1 SV=2	0	0.0209
sp|P12109|CO6A1_HUMAN	P12109	1	1	1.8	1028	108529	Collagen alpha-1(VI) chain OS=Homo sapiens OX=9606 GN=COL6A1 PE=1 SV=3	0	0.0423
sp|P12259|FA5_HUMAN	P12259	1	1	0.8	2224	251701	Coagulation factor V OS=Homo sapiens OX=9606 GN=F5 PE=1 SV=4	0	0.0186
sp|P13796|PLSL_HUMAN;sp|P13797|PLST_HUMAN	P13796;P13797	1	1	2.1	627	70289	Plastin-2 OS=Homo sapiens OX=9606 GN=LCP1 PE=1 SV=6	0	0.0495
sp|P15259|PGAM2_HUMAN;sp|Q8N0Y7|PGAM4_HUMAN;sp|P18669|PGAM1_HUMAN	P15259;Q8N0Y7;P18669	1	1	6.3	253	28766	Phosphoglycerate mutase 2 OS=Homo sapiens OX=9606 GN=PGAM2 PE=1 SV=3	0.0001	0.1561
sp|P15291|B4GT1_HUMAN	P15291	1	1	3	398	43920	Beta-1,4-galactosyltransferase 1 OS=Homo sapiens OX=9606 GN=B4GALT1 PE=1 SV=5	0	0.0715
sp|P15814|IGLL1_HUMAN	P15814	1	1	7	213	22963	Immunoglobulin lambda-like polypeptide 1 OS=Homo sapiens OX=9606 GN=IGLL1 PE=1 SV=1	0.0001	0.1749
sp|P16401|H15_HUMAN	P16401	1	1	6.6	226	22580	Histone H1.5 OS=Homo sapiens OX=9606 GN=H1-5 PE=1 SV=3	0.0001	0.1641
sp|P21926|CD9_HUMAN	P21926	1	1	4.4	228	25416	CD9 antigen OS=Homo sapiens OX=9606 GN=CD9 PE=1 SV=4	0.0001	0.1066
sp|P21980|TGM2_HUMAN	P21980	1	1	1.9	687	77329	Protein-glutamine gamma-glutamyltransferase 2 OS=Homo sapiens OX=9606 GN=TGM2 PE=1 SV=2	0	0.0447
sp|P24158|PRTN3_HUMAN	P24158	1	1	4.7	256	27807	Myeloblastin OS=Homo sapiens OX=9606 GN=PRTN3 PE=1 SV=3	0.0001	0.1143
sp|P27797|CALR_HUMAN	P27797	1	1	4.3	417	48142	Calreticulin OS=Homo sapiens OX=9606 GN=CALR PE=1 SV=1	0	0.1041
sp|P28325|CYTD_HUMAN	P28325	1	1	10.6	142	16080	Cystatin-D OS=Homo sapiens OX=9606 GN=CST5 PE=1 SV=1	0.0001	0.2764
sp|P29401|TKT_HUMAN	P29401	1	1	3.5	623	67878	Transketolase OS=Homo sapiens OX=9606 GN=TKT PE=1 SV=3	0	0.0839
sp|P35579|MYH9_HUMAN	P35579	1	1	0.9	1960	226530	Myosin-9 OS=Homo sapiens OX=9606 GN=MYH9 PE=1 SV=4	0	0.0209
sp|P37802|TAGL2_HUMAN	P37802	1	1	5.5	199	22391	Transgelin-2 OS=Homo sapiens OX=9606 GN=TAGLN2 PE=1 SV=3	0.0001	0.135
sp|P48723|HSP13_HUMAN	P48723	1	1	3.4	471	51928	Heat shock 70 kDa protein 13 OS=Homo sapiens OX=9606 GN=HSPA13 PE=1 SV=1	0	0.0814
sp|P52565|GDIR1_HUMAN	P52565	1	1	7.4	204	23207	Rho GDP-dissociation inhibitor 1 OS=Homo sapiens OX=9606 GN=ARHGDIA PE=1 SV=3	0.0001	0.1858
sp|P54108|CRIS3_HUMAN	P54108	1	1	6.5	245	27630	Cysteine-rich secretory protein 3 OS=Homo sapiens OX=9606 GN=CRISP3 PE=1 SV=1	0.0001	0.1614
sp|Q14574|DSC3_HUMAN	Q14574	1	1	1.6	896	99969	Desmocollin-3 OS=Homo sapiens OX=9606 GN=DSC3 PE=1 SV=3	0	0.0375
sp|Q8WUM4|PDC6I_HUMAN	Q8WUM4	1	1	1.8	868	96023	Programmed cell death 6-interacting protein OS=Homo sapiens OX=9606 GN=PDCD6IP PE=1 SV=1	0	0.0423
sp|Q8WXI7|MUC16_HUMAN	Q8WXI7	1	1	0.2	14507	1519216	Mucin-16 OS=Homo sapiens OX=9606 GN=MUC16 PE=1 SV=3	0	0.0046
sp|Q9NRA1|PDGFC_HUMAN	Q9NRA1	1	1	5.2	345	39029	Platelet-derived growth factor C OS=Homo sapiens OX=9606 GN=PDGFC PE=1 SV=2	0.0001	0.1272
sp|Q9NZP8|C1RL_HUMAN	Q9NZP8	1	1	3.1	487	53498	Complement C1r subcomponent-like protein OS=Homo sapiens OX=9606 GN=C1RL PE=1 SV=2	0	0.074
sp|Q9UBR2|CATZ_HUMAN	Q9UBR2	1	1	3.3	303	33868	Cathepsin Z OS=Homo sapiens OX=9606 GN=CTSZ PE=1 SV=1	0.0001	0.0789
sp|Q9UBT3|DKK4_HUMAN	Q9UBT3	1	1	5.4	224	24876	Dickkopf-related protein 4 OS=Homo sapiens OX=9606 GN=DKK4 PE=1 SV=1	0.0001	0.1324

[truncated: 20 more sheets: 11) 200ng-88min#2(411), 12) 200ng-88min#3(429), 13) 500ng-21min#1(292), 14) 500ng-21min#2(304), 15) 500ng-21min#3(284), 16) 500ng-44min#1(322), 17) 500ng-44min#2(316), 18) 500ng-44min#3(337), 19) 500ng-88min#1(597), 20) 500ng-88min#2(568), 21) 500ng-88min#3(608), 22) 1000ng-21min#1(241), 23) 1000ng-21min#2(238), 24) 1000ng-21min#3(245), 25) 1000ng-44min#1(277), 26) 1000ng-44min#2(268), 27) 1000ng-44min#3(276), 28) 1000ng-88min#1(541), 29) 1000ng-88min#2(528), 30) 1000ng-88min#3(504)]
